# Supplementary material for: Bone-Metabolism-Related Serum microRNAs to Diagnose Osteoporosis in Middle-Aged and Elderly Women
Source: MDPI journal article supplement (doi:10.3390/diagnostics12112872), 2022-11-19
Supplement: s1 [file s1]

**Supplementary Table S2. Upregulated and downregulated miRNAs between PMOP patients and n-PMOP controls**

| Level                        | Gene                       |                           |                             |                            |                           |
|------------------------------|----------------------------|---------------------------|-----------------------------|----------------------------|---------------------------|
| Upregulated miRNAs (n = 148) | hsa-miR-5186<br>(6.57)     | hsa-miR-4527<br>(6.42)    | hsa-miR-144-5p<br>(6.41)    | hsa-miR-4320<br>(5.90)     | hsa-miR-4770<br>(5.80)    |
|                              | hsa-miR-340-5p<br>(5.80)   | hsa-miR-506-3p<br>(5.71)  | hsa-miR-8068<br>(5.52)      | hsa-let-7b-5p<br>(5.42)    | hsa-miR-6851-3p<br>(5.39) |
|                              | hsa-miR-136-5p<br>(5.38)   | hsa-miR-6737-3p<br>(5.17) | hsa-miR-4504<br>(5.15)      | hsa-miR-6889-3p<br>(5.07)  | hsa-miR-4777-5p<br>(5.04) |
|                              | hsa-miR-605-3p<br>(5.04)   | hsa-miR-6514-3p<br>(4.84) | hsa-miR-128-2-5p<br>(4.74)  | hsa-miR-128-1-5p<br>(4.71) | hsa-miR-1298-3p<br>(4.65) |
|                              | hsa-miR-103a-3p<br>(4.62)  | hsa-miR-5191<br>(4.61)    | hsa-miR-3654<br>(4.60)      | hsa-miR-545-5p<br>(4.57)   | hsa-miR-3653-5p<br>(4.56) |
|                              | hsa-miR-15b-5p<br>(4.56)   | hsa-miR-4658<br>(4.53)    | hsa-miR-491-3p<br>(4.52)    | hsa-miR-4490<br>(4.51)     | hsa-let-7c-5p<br>(4.48)   |
|                              | hsa-miR-4690-5p<br>(4.47)  | hsa-let-7a-5p<br>(4.36)   | hsa-miR-5010-3p<br>(4.32)   | hsa-miR-107<br>(4.22)      | hsa-miR-6880-3p<br>(4.19) |
|                              | hsa-miR-4692<br>(4.18)     | hsa-miR-144-3p<br>(4.17)  | hsa-miR-8086<br>(4.08)      | hsa-miR-299-3p<br>(4.05)   | hsa-miR-21-3p<br>(4.03)   |
|                              | hsa-miR-1245b-3p<br>(4.02) | hsa-miR-216b-5p<br>(3.78) | hsa-miR-6506-3p<br>(3.76)   | hsa-miR-507<br>(3.74)      | hsa-miR-99b-3p<br>(3.64)  |
|                              | hsa-miR-4694-3p<br>(3.50)  | hsa-miR-1208<br>(3.49)    | hsa-miR-1303<br>(3.49)      | hsa-miR-183-5p<br>(3.49)   | hsa-miR-200b-3p<br>(3.49) |
|                              | hsa-miR-217<br>(3.49)      | hsa-miR-3157-5p<br>(3.49) | hsa-miR-3668<br>(3.49)      | hsa-miR-3913-5p<br>(3.49)  | hsa-miR-3914<br>(3.49)    |
|                              | hsa-miR-4300<br>(3.49)     | hsa-miR-4538<br>(3.49)    | hsa-miR-4677-3p<br>(3.49)   | hsa-miR-4725-5p<br>(3.49)  | hsa-miR-490-5p<br>(3.49)  |
|                              | hsa-miR-5588-5p<br>(3.49)  | hsa-miR-580-5p<br>(3.49)  | hsa-miR-6760-3p<br>(3.49)   | hsa-miR-6832-5p<br>(3.49)  | hsa-miR-6870-3p<br>(3.49) |
|                              | hsa-miR-922<br>(3.49)      | hsa-miR-937-3p<br>(3.49)  | hsa-miR-4793-3p<br>(3.47)   | hsa-miR-181b-5p<br>(3.42)  | hsa-miR-4763-3p<br>(3.29) |
|                              | hsa-miR-520a-3p<br>(3.24)  | hsa-miR-7108-5p<br>(3.20) | hsa-miR-6753-5p<br>(3.19)   | hsa-miR-3917<br>(3.15)     | hsa-miR-6718-5p<br>(3.04) |
|                              | hsa-miR-1266-3p<br>(3.01)  | hsa-miR-7157-3p<br>(2.99) | hsa-miR-378j<br>(2.98)      | hsa-miR-4434<br>(2.98)     | hsa-miR-4754<br>(2.87)    |
|                              | hsa-miR-511-3p<br>(2.86)   | hsa-miR-6840-3p<br>(2.83) | hsa-miR-181a-2-3p<br>(2.80) | hsa-miR-500a-3p<br>(2.79)  | hsa-miR-6892-3p<br>(2.79) |
|                              | hsa-miR-6503-3p<br>(2.77)  | hsa-miR-6731-3p<br>(2.77) | hsa-miR-7154-3p<br>(2.72)   | hsa-miR-3155a<br>(2.72)    | hsa-miR-6800-5p<br>(2.70) |

|                                                    |                            |                             |                            |                            |                             |
|----------------------------------------------------|----------------------------|-----------------------------|----------------------------|----------------------------|-----------------------------|
|                                                    | hsa-miR-4652-5p<br>(2.69)  | hsa-miR-6777-5p<br>(2.56)   | hsa-miR-2355-5p<br>(2.51)  | hsa-miR-4426<br>(2.49)     | hsa-miR-6854-5p<br>(2.36)   |
|                                                    | hsa-miR-8075<br>(2.35)     | hsa-miR-4518<br>(2.33)      | hsa-miR-1304-3p<br>(2.25)  | hsa-miR-6795-3p<br>(2.25)  | hsa-miR-6865-3p<br>(2.23)   |
|                                                    | hsa-miR-5003-3p<br>(2.22)  | hsa-miR-4431<br>(2.20)      | hsa-miR-3915<br>(2.16)     | hsa-miR-6884-5p<br>(2.11)  | hsa-miR-6800-3p<br>(2.06)   |
|                                                    | hsa-miR-373-3p<br>(2.02)   | hsa-miR-6509-5p<br>(2.00)   | hsa-miR-4436b-3p<br>(1.85) | hsa-miR-3648<br>(1.80)     | hsa-miR-541-3p<br>(1.78)    |
|                                                    | hsa-miR-1258<br>(1.77)     | hsa-miR-3133<br>(1.74)      | hsa-miR-4784<br>(1.71)     | hsa-miR-4712-3p<br>(1.70)  | hsa-miR-30c-2-3p<br>(1.65)  |
|                                                    | hsa-miR-6134<br>(1.63)     | hsa-miR-184<br>(1.54)       | hsa-miR-6739-5p<br>(1.51)  | hsa-miR-3150b-3p<br>(1.51) | hsa-miR-182-5p<br>(1.49)    |
|                                                    | hsa-miR-4673<br>(1.46)     | hsa-miR-1288-5p<br>(1.44)   | hsa-miR-492<br>(1.36)      | hsa-miR-4691-3p<br>(1.33)  | hsa-miR-6797-5p<br>(1.33)   |
|                                                    | hsa-miR-4632-5p<br>(1.31)  | hsa-miR-6766-5p<br>(1.30)   | hsa-miR-3150b-5p<br>(1.23) | hsa-miR-5587-3p<br>(1.23)  | hsa-miR-6888-5p<br>(1.23)   |
|                                                    | hsa-miR-4651<br>(1.21)     | hsa-miR-4309<br>(1.19)      | hsa-miR-3132<br>(1.17)     | hsa-miR-6125<br>(1.16)     | hsa-miR-487a-3p<br>(1.16)   |
|                                                    | hsa-miR-5197-3p<br>(1.16)  | hsa-miR-664a-5p<br>(1.13)   | hsa-miR-6717-5p<br>(1.11)  | hsa-miR-6791-5p<br>(1.09)  | hsa-miR-4306<br>(1.08)      |
|                                                    | hsa-miR-4469<br>(1.07)     | hsa-miR-502-3p<br>(1.07)    | hsa-miR-6788-5p<br>(1.06)  | hsa-miR-4737<br>(1.04)     | hsa-miR-330-3p<br>(1.04)    |
|                                                    | hsa-miR-6745<br>(1.03)     | hsa-miR-1247-3p<br>(1.01)   | hsa-miR-6748-5p<br>(1.01)  |                            |                             |
| Downr<br>egulate<br>d<br>miRN<br>As<br>(n =<br>50) | hsa-miR-4767<br>(-5.11)    | hsa-miR-4724-5p<br>(-3.70)  | hsa-miR-1260a<br>(-2.90)   | hsa-miR-1270<br>(-2.50)    | hsa-miR-6500-3p<br>(-2.47)  |
|                                                    | hsa-miR-4260<br>(-2.38)    | hsa-miR-6752-5p<br>(-2.38)  | hsa-miR-4444<br>(-2.27)    | hsa-miR-668-5p<br>(-2.27)  | hsa-miR-4768-5p<br>(-2.20)  |
|                                                    | hsa-miR-6781-5p<br>(-2.18) | hsa-miR-6877-5p<br>(-2.14)  | hsa-miR-3158-5p<br>(-1.97) | hsa-miR-921<br>(-1.97)     | hsa-miR-4429<br>(-1.96)     |
|                                                    | hsa-miR-758-5p<br>(-1.84)  | hsa-miR-6769a-5p<br>(-1.75) | hsa-miR-4698<br>(-1.69)    | hsa-miR-6798-5p<br>(-1.69) | hsa-miR-6786-5p<br>(-1.69)  |
|                                                    | hsa-miR-4261<br>(-1.64)    | hsa-miR-125a-3p<br>(-1.62)  | hsa-miR-6798-3p<br>(-1.60) | hsa-miR-4299<br>(-1.55)    | hsa-miR-6738-5p<br>(-1.55)  |
|                                                    | hsa-miR-550a-5p<br>(-1.54) | hsa-miR-300<br>(-1.54)      | hsa-miR-328-5p<br>(-1.54)  | hsa-miR-616-3p<br>(-1.54)  | hsa-miR-92a-1-5p<br>(-1.54) |
|                                                    | hsa-miR-518f-5p<br>(-1.51) | hsa-miR-4687-3p<br>(-1.47)  | hsa-miR-4484<br>(-1.44)    | hsa-miR-934<br>(-1.43)     | hsa-miR-4428<br>(-1.41)     |

|  |                            |                            |                            |                            |                            |
|--|----------------------------|----------------------------|----------------------------|----------------------------|----------------------------|
|  | hsa-miR-494-3p<br>(-1.38)  | hsa-miR-6812-5p<br>(-1.37) | hsa-miR-6814-5p<br>(-1.35) | hsa-miR-4667-5p<br>(-1.31) | hsa-miR-574-3p<br>(-1.30)  |
|  | hsa-miR-6845-5p<br>(-1.29) | hsa-miR-933<br>(-1.28)     | hsa-miR-4656<br>(-1.24)    | hsa-miR-6893-5p<br>(-1.21) | hsa-miR-7847-3p<br>(-1.19) |
|  | hsa-miR-4788<br>(-1.15)    | hsa-miR-6086<br>(-1.10)    | hsa-miR-6826-5p<br>(-1.09) | hsa-miR-7152-3p<br>(-1.08) | hsa-miR-6794-5p<br>(-1.02) |

The screening criteria of DE miRNAs were  $\text{adj.}P < 0.05$  and  $|\text{Log2FC}| > 1$ . The values of Log2FC were shown in parentheses.

PMOP, postmenopausal osteoporosis; n-PMOP, postmenopausal without osteoporosis; FC, fold change.
