# Supplementary material for: Bone-Metabolism-Related Serum microRNAs to Diagnose Osteoporosis in Middle-Aged and Elderly Women
Source: MDPI journal article supplement (doi:10.3390/diagnostics12112872), 2022-11-19
Supplement: s1 [file s1]

**Supplementary Table S6. General clinical data, serum BTMs and biochemical indices of participants with different BMDs**

| Variable                        | Normal<br>( <i>n</i> = 6)    | Osteopenia<br>( <i>n</i> = 20) | Osteoporosis<br>( <i>n</i> = 29) | Severe osteoporosis<br>( <i>n</i> = 18) | <i>F</i> | <i>P</i>          |
|---------------------------------|------------------------------|--------------------------------|----------------------------------|-----------------------------------------|----------|-------------------|
| Age (years)                     | 59.2 ± 6.3 <sup>d</sup>      | 61.4 ± 7.8 <sup>d</sup>        | 65.9 ± 9.3                       | 68.7 ± 5.5 <sup>ab</sup>                | 3.930    | <b>0.012</b>      |
| BMI (g/cm <sup>2</sup> )        | 24.4 ± 2.7                   | 23.7 ± 2.6                     | 22.0 ± 3.2                       | 22.7 ± 3.7                              | 1.734    | 0.168             |
| Age at menopause (years)        | 53.5 ± 2.9                   | 51.5 ± 3.7                     | 51.0 ± 3.3                       | 52.6 ± 4.3                              | 1.247    | 0.299             |
| Menopausal duration (years)     | 5.7 ± 4.5 <sup>cd</sup>      | 10.0 ± 7.0 <sup>cd</sup>       | 14.9 ± 9.0 <sup>ab</sup>         | 16.2 ± 6.5 <sup>ab</sup>                | 4.555    | <b>0.006</b>      |
| LS 1–4 BMD (T-score)            | 0.0 ± 0.9 <sup>bcd</sup>     | −1.3 ± 0.7 <sup>acd</sup>      | −2.6 ± 0.9 <sup>abd</sup>        | −3.5 ± 1.3 <sup>abc</sup>               | 28.679   | <b>&lt; 0.001</b> |
| TH BMD (T-score)                | −0.1 ± 0.6 <sup>bcd</sup>    | −1.4 ± 0.6 <sup>acd</sup>      | −2.3 ± 0.9 <sup>ab</sup>         | −2.7 ± 0.6 <sup>ab</sup>                | 22.150   | <b>&lt; 0.001</b> |
| FN BMD (T-score)                | −0.6 ± 0.6 <sup>bcd</sup>    | −1.8 ± 0.5 <sup>acd</sup>      | −2.7 ± 0.7 <sup>ab</sup>         | −2.9 ± 0.6 <sup>ab</sup>                | 31.475   | <b>&lt; 0.001</b> |
| LS 1–4 BMD (g/cm <sup>2</sup> ) | 1.110 ± 0.111 <sup>bcd</sup> | 0.941 ± 0.078 <sup>acd</sup>   | 0.800 ± 0.099 <sup>abd</sup>     | 0.692 ± 0.149 <sup>abc</sup>            | 30.002   | <b>&lt; 0.001</b> |
| TH BMD (g/cm <sup>2</sup> )     | 0.962 ± 0.071 <sup>bcd</sup> | 0.788 ± 0.082 <sup>acd</sup>   | 0.684 ± 0.111 <sup>abd</sup>     | 0.627 ± 0.084 <sup>abc</sup>            | 23.506   | <b>&lt; 0.001</b> |
| FN BMD (g/cm <sup>2</sup> )     | 0.864 ± 0.066 <sup>bcd</sup> | 0.713 ± 0.055 <sup>acd</sup>   | 0.616 ± 0.077 <sup>ab</sup>      | 0.578 ± 0.076 <sup>ab</sup>             | 32.011   | <b>&lt; 0.001</b> |
| 25(OH)D (ng/mL)                 | 26.7 ± 9.8                   | 23.6 ± 6.4                     | 23.3 ± 6.6                       | 24.3 ± 10.6                             | 0.317    | 0.813             |
| N-MID (ng/mL)                   | 20.46 ± 6.59                 | 16.79 ± 6.25 <sup>c</sup>      | 21.43 ± 8.69 <sup>bd</sup>       | 15.37 ± 8.15 <sup>c</sup>               | 2.772    | <b>0.048</b>      |
| P1NP (ng/mL)                    | 57.14 ± 44.01                | 57.79 ± 29.50                  | 55.48 ± 27.90                    | 49.05 ± 30.41                           | 0.296    | 0.828             |
| β-CTX (ng/mL)                   | 0.512 ± 0.234                | 0.526 ± 0.286                  | 0.605 ± 0.518                    | 0.637 ± 0.475                           | 0.283    | 0.838             |
| UA (μmol/L)                     | 304.0 ± 79.2                 | 300.2 ± 93.4                   | 305.7 ± 73.4                     | 296.3 ± 90.2                            | 0.050    | 0.985             |
| ALP (U/L)                       | 68.5 ± 17.6 <sup>d</sup>     | 75.6 ± 31.3 <sup>d</sup>       | 74.4 ± 21.6 <sup>d</sup>         | 108.2 ± 36.3 <sup>abc</sup>             | 6.588    | <b>0.001</b>      |
| Calcium (mmol/L)                | 2.30 ± 0.19                  | 2.21 ± 0.18 <sup>c</sup>       | 2.32 ± 0.12 <sup>bd</sup>        | 2.21 ± 0.19 <sup>c</sup>                | 2.617    | 0.058             |
| Phosphorus (mmol/L)             | 1.34 ± 0.07 <sup>bcd</sup>   | 1.10 ± 0.18 <sup>a</sup>       | 1.17 ± 0.18 <sup>a</sup>         | 1.16 ± 0.19 <sup>a</sup>                | 2.791    | <b>0.047</b>      |

Data are presented as mean ± standard deviation. All *P* values were calculated with the One-Way ANOVA. a, *P* < 0.05 when compared to normal group; b, *P* < 0.05 when compared to osteopenia group; c, *P* < 0.05 when compared to osteoporosis group; d, *P* < 0.05 when compared to severe osteoporosis group.

BTMs, bone turnover markers; BMD, bone mineral density; BMI, body mass index; LS, lumbar spine; TH, total hip; FN, femoral neck; 25(OH)D, 25-hydroxy vitamin D; N-MID, N-terminal middle segment osteocalcin; P1NP, propeptide of type I procollagen; β-CTX, β-C-terminal telopeptide of type I collagen; UA, uric acid; ALP, alkaline phosphatase.
