# Supplementary material for: Bone-Metabolism-Related Serum microRNAs to Diagnose Osteoporosis in Middle-Aged and Elderly Women
Source: MDPI journal article supplement (doi:10.3390/diagnostics12112872), 2022-11-19
Supplement: s1 [file s1]

**Supplemental Table S1. Primer sequences used for qRT-PCR**

| <b>Gene</b>     | <b>Primer</b>                                              | <b>Annealing temperature (°C)</b> | <b>Product length (bp)</b> |
|-----------------|------------------------------------------------------------|-----------------------------------|----------------------------|
| hsa-miR-5186    | GSP:5'GGGGGGAGAGATTGGTAGAAA3'<br>R:5'GTGCGTGTCGTGGAGTCG3'  | 60                                | 65                         |
| hsa-miR-4527    | GSP:5'GGGATGGTCTGCAAAGAGAT3'<br>R:5'GTGCGTGTCGTGGAGTCG3'   | 60                                | 64                         |
| hsa-miR-144-5p  | GSP:5'GGGGGGGGATATCATCATATAC3'<br>R:5'GTGCGTGTCGTGGAGTCG3' | 60                                | 66                         |
| hsa-miR-4320    | GSP:5'GGGGGAAAGGGATTCTGTAG3'<br>R:5'GTGCGTGTCGTGGAGTCG3'   | 60                                | 64                         |
| hsa-miR-4770    | GSP:5'GGGGCTTGAGATGACACTG3'<br>R:5'GTGCGTGTCGTGGAGTCG3'    | 60                                | 62                         |
| hsa-miR-340-5p  | GSP:5'GCGGTTATAAAGCAATGAGA3'<br>R:5'GTGCGTGTCGTGGAGTCG3'   | 60                                | 66                         |
| hsa-miR-506-3p  | GSP:5'GGGATAAGGCACCCTTCTG3'<br>R:5'GTGCGTGTCGTGGAGTCG3'    | 60                                | 63                         |
| hsa-miR-8068    | GSP:5'GGGGGTGTTTGTGTGTAAGGAT3'<br>R:5'GTGCGTGTCGTGGAGTCG3' | 60                                | 65                         |
| hsa-let-7b-5p   | GSP:5'AGGGGGTGAGGTAGTAGGTTGT3'<br>R:5'GTGCGTGTCGTGGAGTCG3' | 60                                | 66                         |
| hsa-miR-6851-3p | GSP:5'GGATGGCCCTTTGTACCC3'<br>R:5'GTGCGTGTCGTGGAGTCG3'     | 60                                | 62                         |
| hsa-miR-425-5p  | GSP:5'GGGGAATGACACGATCACTC3'<br>R:5'GTGCGTGTCGTGGAGTCG3'   | 60                                | 65                         |

GSP is the specific primer corresponding to miRNA; R is the primer that matched with RT primer.
