# Supplementary material for: Bone-Metabolism-Related Serum microRNAs to Diagnose Osteoporosis in Middle-Aged and Elderly Women
Source: MDPI journal article supplement (doi:10.3390/diagnostics12112872), 2022-11-19
Supplement: s1 [file s1]

**Supplementary Table S5. Performance characteristics of the miRNAs for diagnosing PMOP (training set)**

| Variable                                             | AUC<br>(95% CI)     | <i>P</i>       | Sensitivity<br>(95% CI) | Specificity<br>(95% CI) | PPV<br>(95% CI)  | NPV<br>(95% CI)    |
|------------------------------------------------------|---------------------|----------------|-------------------------|-------------------------|------------------|--------------------|
| Numbers of miRNA: 1                                  |                     |                |                         |                         |                  |                    |
| hsa-miR-144-5p                                       | 0.747 (0.580–0.874) | 0.006          | 100.0 (85.8–100.0)      | 50.0 (23.0–77.0)        | 77.4 (58.9–90.4) | 100.0 (59.0–100.0) |
| hsa-miR-506-3p                                       | 0.832 (0.675–0.933) | < <b>0.001</b> | 91.7 (73.0–99.9)        | 78.6 (49.2–95.3)        | 88.0 (68.8–97.5) | 84.6 (54.6–98.1)   |
| hsa-miR-8068                                         | 0.775 (0.611–0.894) | < <b>0.001</b> | 66.7 (44.7–84.4)        | 85.7 (57.2–98.2)        | 88.9 (65.3–98.6) | 60.0 (36.1–80.9)   |
| hsa-miR-6851-3p                                      | 0.814 (0.655–0.921) | < <b>0.001</b> | 91.7 (73.0–99.0)        | 64.3 (35.1–87.2)        | 81.5 (61.9–93.7) | 81.8 (48.2–97.7)   |
| Numbers of miRNA: 2                                  |                     |                |                         |                         |                  |                    |
| hsa-miR-144-5p + hsa-miR-506-3p                      | 0.804 (0.643–0.914) | < <b>0.001</b> | 100.0 (85.8–100.0)      | 57.14 (28.9–82.3)       | 80.0 (61.4–92.3) | 100.0 (63.1–100.0) |
| hsa-miR-144-5p + hsa-miR-8068                        | 0.810 (0.650–0.918) | < <b>0.001</b> | 70.8 (48.9–87.4)        | 85.7 (57.2–98.2)        | 89.5 (66.9–98.7) | 63.2 (38.4–83.7)   |
| hsa-miR-144-5p + hsa-miR-6851-3p                     | 0.824 (0.667–0.928) | < <b>0.001</b> | 95.8 (78.9–99.9)        | 57.14 (28.9–82.3)       | 79.3 (60.3–92.0) | 88.9 (51.8–99.7)   |
| hsa-miR-506-3p + hsa-miR-8068                        | 0.801 (0.639–0.912) | < <b>0.001</b> | 70.8 (48.9–87.4)        | 85.7 (57.2–98.2)        | 89.5 (66.9–98.7) | 63.2 (38.4–83.7)   |
| hsa-miR-506-3p + hsa-miR-6851-3p                     | 0.818 (0.660–0.924) | < <b>0.001</b> | 91.7 (73.0–99.0)        | 64.3 (35.1–87.2)        | 81.5 (61.9–93.7) | 81.8 (48.2–97.7)   |
| hsa-miR-8068 + hsa-miR-6851-3p                       | 0.810 (0.650–0.918) | < <b>0.001</b> | 79.2 (57.8–92.9)        | 78.6 (49.2–95.3)        | 86.4 (65.1–97.1) | 68.7 (41.3–89.0)   |
| Numbers of miRNA: 3                                  |                     |                |                         |                         |                  |                    |
| hsa-miR-144-5p + hsa-miR-506-3p +<br>hsa-miR-8068    | 0.813 (0.653–0.920) | < <b>0.001</b> | 75.0 (53.3–90.2)        | 85.7 (57.2–98.2)        | 90.0 (68.3–98.8) | 66.7 (41.0–86.7)   |
| hsa-miR-144-5p + hsa-miR-506-3p +<br>hsa-miR-6851-3p | 0.836 (0.681–0.936) | < <b>0.001</b> | 95.8 (78.9–99.9)        | 57.1 (28.9–82.3)        | 79.3 (60.3–92.0) | 88.9 (51.8–99.7)   |
| hsa-miR-506-3p + hsa-miR-8068 +<br>hsa-miR-6851-3p   | 0.815 (0.656–0.922) | < <b>0.001</b> | 83.3 (62.6–95.3)        | 71.4 (41.9–91.6)        | 83.3 (62.6–95.3) | 71.4 (41.9–91.6)   |
| hsa-miR-144-5p + hsa-miR-8068 +<br>hsa-miR-6851-3p   | 0.836 (0.681–0.936) | < <b>0.001</b> | 79.2 (57.8–92.9)        | 78.6 (49.2–95.3)        | 86.4 (65.1–97.1) | 68.7 (41.3–89.0)   |
| Numbers of miRNA: 4                                  |                     |                |                         |                         |                  |                    |
| hsa-miR-144-5p + hsa-miR-506-3p +                    | 0.845 (0.691–0.942) | < <b>0.001</b> | 91.7 (73.0–99.0)        | 64.3 (35.1–87.2)        | 81.5 (61.9–93.7) | 81.8 (48.2–97.7)   |

| <b>Variable</b>                | <b>AUC<br/>(95% CI)</b> | <b><i>P</i></b> | <b>Sensitivity<br/>(95% CI)</b> | <b>Specificity<br/>(95% CI)</b> | <b>PPV<br/>(95% CI)</b> | <b>NPV<br/>(95% CI)</b> |
|--------------------------------|-------------------------|-----------------|---------------------------------|---------------------------------|-------------------------|-------------------------|
| hsa-miR-8068 + hsa-miR-6851-3p |                         |                 |                                 |                                 |                         |                         |

Data are presented as value, value (95% CI) or % (95% CI). *P* value < 0.05 was considered to indicate a statistically significant difference (highlighted in bold).

PMOP, postmenopausal osteoporosis; AUC, area under the curve; CI, confidence interval; PPV, positive predictive value; NPV, negative predictive value.
