# Supplementary material for: Bone-Metabolism-Related Serum microRNAs to Diagnose Osteoporosis in Middle-Aged and Elderly Women
Source: MDPI journal article supplement (doi:10.3390/diagnostics12112872), 2022-11-19
Supplement: s1 [file s1]

**Supplementary Table S4. qRT-PCR results for candidate key miRNAs in the training set**

| Variable        | $2^{-\Delta\Delta CT}$ | FC   | Log2FC | <i>P</i>     |
|-----------------|------------------------|------|--------|--------------|
| hsa-miR-144-5p  |                        |      |        |              |
| PMOP            | 1.66                   | 3.02 | 1.59   | <b>0.028</b> |
| n-PMOP          | 0.55                   |      |        |              |
| hsa-miR-340-5p  |                        |      |        |              |
| PMOP            | 0.57                   | 1.44 | 0.53   | 0.371        |
| n-PMOP          | 0.40                   |      |        |              |
| hsa-miR-506-3p  |                        |      |        |              |
| PMOP            | 1.14                   | 3.19 | 1.67   | <b>0.030</b> |
| n-PMOP          | 0.36                   |      |        |              |
| hsa-miR-8068    |                        |      |        |              |
| PMOP            | 1.02                   | 1.56 | 0.64   | <b>0.009</b> |
| n-PMOP          | 0.65                   |      |        |              |
| hsa-miR-6851-3p |                        |      |        |              |
| PMOP            | 1.30                   | 3.09 | 1.63   | <b>0.009</b> |
| n-PMOP          | 0.42                   |      |        |              |

All *P* values were calculated with the *t*-test. *P* value < 0.05 was considered to indicate a statistically significant difference (highlighted in bold).

qRT-PCR, quantitative real-time PCR; FC, fold change; PMOP, postmenopausal osteoporosis; n-PMOP, postmenopausal without osteoporosis.
