# Supplementary material for: Bone-Metabolism-Related Serum microRNAs to Diagnose Osteoporosis in Middle-Aged and Elderly Women
Source: MDPI journal article supplement (doi:10.3390/diagnostics12112872), 2022-11-19
Supplement: s1 [file s1]

**Supplementary Table S10. The top 20 target genes and their degree of enrichment (DEmiRNAs)**

| <b>Gene</b>   | <b>Degree</b> | <b>Gene</b>   | <b>Degree</b> |
|---------------|---------------|---------------|---------------|
| <i>UBB</i>    | 198           | <i>PIK3R1</i> | 67            |
| <i>TP53</i>   | 110           | <i>CUL3</i>   | 67            |
| <i>MAPK1</i>  | 79            | <i>H2AFZ</i>  | 66            |
| <i>POLR2F</i> | 79            | <i>CUL2</i>   | 66            |
| <i>BTRC</i>   | 79            | <i>PPP2CA</i> | 65            |
| <i>SKP2</i>   | 77            | <i>UBE2D2</i> | 64            |
| <i>RHOA</i>   | 76            | <i>FBXL7</i>  | 64            |
| <i>CDC27</i>  | 70            | <i>CCNB1</i>  | 63            |
| <i>SMURF1</i> | 68            | <i>FBXW7</i>  | 62            |
| <i>ANAPC7</i> | 68            | <i>FBXL3</i>  | 62            |

DEmiRNAs, differentially expressed miRNAs.
