# Supplementary material for: Bone-Metabolism-Related Serum microRNAs to Diagnose Osteoporosis in Middle-Aged and Elderly Women
Source: MDPI journal article supplement (doi:10.3390/diagnostics12112872), 2022-11-19
Supplement: s1 [file s1]

**Supplementary Table S3. Verification of microarray results by qRT-PCR**

| Variable        | $2^{-\Delta\Delta CT}$ | FC    | Log2FC | <i>P</i> |
|-----------------|------------------------|-------|--------|----------|
| hsa-miR-5186    |                        |       |        |          |
| PMOP            | 2.91                   | 2.51  | 1.33   | < 0.001  |
| n-PMOP          | 1.16                   |       |        |          |
| hsa-miR-4527    |                        |       |        |          |
| PMOP            | 5.76                   | 2.77  | 1.47   | 0.036    |
| n-PMOP          | 2.08                   |       |        |          |
| hsa-miR-144-5p  |                        |       |        |          |
| PMOP            | 66.52                  | 23.97 | 4.58   | 0.005    |
| n-PMOP          | 2.78                   |       |        |          |
| hsa-miR-4320    |                        |       |        |          |
| PMOP            | 2.05                   | 3.77  | 1.91   | < 0.001  |
| n-PMOP          | 0.55                   |       |        |          |
| hsa-miR-4770    |                        |       |        |          |
| PMOP            | 2.31                   | 3.26  | 1.70   | 0.006    |
| n-PMOP          | 0.71                   |       |        |          |
| hsa-miR-340-5p  |                        |       |        |          |
| PMOP            | 6.02                   | 6.08  | 2.60   | < 0.001  |
| n-PMOP          | 0.99                   |       |        |          |
| hsa-miR-506-3p  |                        |       |        |          |
| PMOP            | 8.75                   | 6.47  | 2.69   | < 0.001  |
| n-PMOP          | 1.35                   |       |        |          |
| hsa-miR-8068    |                        |       |        |          |
| PMOP            | 7.76                   | 6.19  | 2.63   | < 0.001  |
| n-PMOP          | 1.25                   |       |        |          |
| hsa-let-7b-5p   |                        |       |        |          |
| PMOP            | 3.53                   | 3.53  | 1.82   | 0.007    |
| n-PMOP          | 1.00                   |       |        |          |
| hsa-miR-6851-3p |                        |       |        |          |
| PMOP            | 5.06                   | 4.95  | 2.31   | < 0.001  |
| n-PMOP          | 1.02                   |       |        |          |

All *P* values were calculated with the *t*-test. *P* value < 0.05 was considered to indicate a statistically significant difference (highlighted in bold).

qRT-PCR, quantitative real-time PCR; FC, fold change; PMOP, postmenopausal osteoporosis; n-PMOP, postmenopausal without osteoporosis.
