# Supplementary material for: Bone-Metabolism-Related Serum microRNAs to Diagnose Osteoporosis in Middle-Aged and Elderly Women
Source: Diagnostics (Basel). 2022 Nov 19;12(11):2872. doi: 10.3390/diagnostics12112872 (PMC9689310; doi:10.3390/diagnostics12112872)
Supplement: Supplementary file 1 [file diagnostics-12-02872-s001.zip]

Archive with 12 entries (12 files):
- Supplementary Figure S1.tif
- Supplementary Figure S2.png
- Supplementary Table S1.pdf
- Supplementary Table S10.pdf
- Supplementary Table S2.pdf
- Supplementary Table S3.pdf
- Supplementary Table S4.pdf
- Supplementary Table S5.pdf
- Supplementary Table S6.pdf
- Supplementary Table S7.pdf
- Supplementary Table S8.xls
- Supplementary Table S9.xls
