# Supplementary material for: Bone-Metabolism-Related Serum microRNAs to Diagnose Osteoporosis in Middle-Aged and Elderly Women
Source: Diagnostics (Basel). 2022 Nov 19;12(11):2872. doi: 10.3390/diagnostics12112872 (PMC9689310; doi:10.3390/diagnostics12112872)
Supplement: Supplementary file 1 [file diagnostics-12-02872-s001.zip › Supplementary Table S8.xls]

## Sheet: Sheet1
Supplementary Table S8. GO analysis of DEmiRNA target genes
ONTOLOGY	ID	Description	GeneRatio	BgRatio	pvalue	p.adjust	qvalue	geneID	Count
BP	GO:0007265	Ras protein signal transduction	92/1785	448/18670	1.03125e-12	6.17719e-09	4.70467e-09	KPNB1/TAX1BP3/RAB22A/PSD3/NRAS/RAB14/IQSEC3/RAB6C/FLOT1/SSX2IP/DNMBP/CDC42SE1/RTN4R/SHOC2/TRIM67/CDKN1A/SPRY1/ABL2/ITGB1/RAB10/RHOC/RAB5B/RND3/JUN/FGF2/RREB1/VAV3/NOTCH2/BRAP/RAB13/ARF6/RHOBTB3/RABL2A/GDI1/MAPRE2/ROCK2/G3BP2/RHOA/SOS1/RRAS2/RAB21/CUL3/TP53/COL3A1/RAP2C/RALB/STMN1/ARHGAP1/KRAS/RDX/PLEKHG2/DLC1/OGT/RAB1B/CBL/RB1/ELMO1/PPP2CB/TNFAIP1/RAB1A/PHACTR4/ITSN2/ITGA3/RHOB/CRKL/SPATA13/IRS2/…	92
BP	GO:0071559	response to transforming growth factor beta	61/1785	255/18670	1.07135e-11	3.2087e-08	2.44381e-08	PPM1A/FURIN/ZBTB7A/PDPK1/LEFTY1/RNF111/LEFTY2/TGFBR3/ZEB1/ZFP36L1/ZFP36L2/CLDN1/SKI/TGFBR1/LIMS1/ACVR2A/UBB/GLG1/MTMR4/JUN/RUNX3/BCL9L/EDN1/ROCK2/RHOA/FERMT2/ADAM9/FYN/APAF1/NR3C1/SIRT1/TP53/COL3A1/FOS/CREB1/ONECUT2/SKIL/SMURF1/LOX/CAV1/WNT4/PIN1/CBL/SMAD3/FOLR1/ITGA3/SMAD7/CRKL/USP15/ACVR1/SMAD1/THBS1/MYOCD/ADAM17/APPL1/TGFBR2/ZFYVE9/NLK/ZNF703/CITED2/PEG10	61
BP	GO:0000082	G1/S transition of mitotic cell cycle	64/1785	279/18670	2.34979e-11	3.51881e-08	2.68e-08	CDC34/SKP2/LATS2/CDK6/WEE1/MDM4/PTEN/KMT2E/PIM2/ORC4/E2F6/SLFN11/ZNF385A/PSME3/BACH1/CDKN1A/ITGB1/CDT1/TRIM71/NACC2/AURKA/CDC25A/CCND2/CNOT6L/CASP2/BTG2/RBL1/CCNE1/LSM11/DCUN1D3/PKD1/MCM7/PPP6C/RRM2/CUL3/TP53/EZH2/CCND1/TFDP2/USP37/CARM1/E2F7/MAX/RDX/RB1/CTDSP1/RFWD3/PHF8/ACVR1/CCNB1/BRD4/MCM4/DDX3X/ID2/PLRG1/CDK2AP2/CTDSP2/ADAM17/MYC/CACUL1/PCNA/ATM/CTDSPL/CUL2	64
BP	GO:0060485	mesenchyme development	64/1785	279/18670	2.34979e-11	3.51881e-08	2.68e-08	AXIN2/SIX4/HAS2/PAX2/ACTA1/MDM4/TGFBR3/ZFP36L1/PTEN/TGFBR1/PDCD6/HMGA2/EFNA1/SPRY1/HAND1/MAPK1/BCL9L/BASP1/FN1/AMER1/PDCD4/EDN1/CLASP1/SEMA6A/SEMA4C/EZH2/CORO1C/RDH10/TCF7L2/TMEM100/WNT4/SMAD3/PHOX2B/GATA4/EFNB1/PHACTR4/FOLR1/SMAD7/KLHL12/SIX2/DDX5/ACVR1/ZFPM2/WNT3A/PDPN/SNAI2/PPP2CA/JAG1/LOXL2/MYC/HIF1A/FBXL17/SEMA6D/TGFBR2/NOTCH1/HNRNPAB/PITX2/ZNF703/LRP6/FOXF2/FGF9/SEMA7A/CITED2/RBPJ	64
BP	GO:0071560	cellular response to transforming growth factor beta stimulus	59/1785	249/18670	3.5291e-11	4.22786e-08	3.22002e-08	PPM1A/FURIN/ZBTB7A/PDPK1/LEFTY1/RNF111/LEFTY2/TGFBR3/ZEB1/ZFP36L1/ZFP36L2/CLDN1/SKI/TGFBR1/LIMS1/ACVR2A/UBB/GLG1/MTMR4/JUN/BCL9L/EDN1/RHOA/FERMT2/ADAM9/FYN/APAF1/NR3C1/SIRT1/TP53/COL3A1/FOS/CREB1/ONECUT2/SKIL/SMURF1/LOX/CAV1/WNT4/PIN1/CBL/SMAD3/FOLR1/ITGA3/SMAD7/CRKL/USP15/ACVR1/SMAD1/THBS1/MYOCD/ADAM17/APPL1/TGFBR2/ZFYVE9/NLK/ZNF703/CITED2/PEG10	59
BP	GO:0044843	cell cycle G1/S phase transition	66/1785	298/18670	5.8792e-11	5.57557e-08	4.24646e-08	CDC34/SKP2/LATS2/CDK6/WEE1/MDM4/PTEN/KMT2E/PIM2/ORC4/E2F6/SLFN11/ZNF385A/PSME3/BACH1/CDKN1A/ITGB1/CDT1/TRIM71/NACC2/AURKA/CDC25A/CCND2/CNOT6L/PHB2/CASP2/BTG2/RBL1/CCNE1/LSM11/DCUN1D3/PKD1/MCM7/PPP6C/RRM2/CUL3/TP53/EZH2/CCND1/FBXW7/TFDP2/USP37/CARM1/E2F7/MAX/RDX/RB1/CTDSP1/RFWD3/PHF8/ACVR1/CCNB1/BRD4/MCM4/DDX3X/ID2/PLRG1/CDK2AP2/CTDSP2/ADAM17/MYC/CACUL1/PCNA/ATM/CTDSPL/CUL2	66
BP	GO:0042326	negative regulation of phosphorylation	90/1785	468/18670	7.6292e-11	5.57557e-08	4.24646e-08	SOCS1/GSKIP/IGF1R/PDPK1/LATS2/CYLD/ATG14/PTEN/DUSP2/ZMYND11/MLLT1/EFNA1/CDKN1A/SPRY1/PPP1R15B/SOCS5/KAT2B/DUSP4/JUN/NR2F2/SH3BP5/TFAP4/EZR/NNT/DNAJA1/PDCD4/DNAJC10/RHOA/DDIT4/SMCR8/DUSP14/SEMA6A/PRKCD/ASH1L/PRKAR2A/SIRT1/CORO1C/UBE2B/BAK1/TRIB3/EPHA1/IPO5/CAV1/DMD/PIN1/CBL/RB1/CTDSP1/IPO7/PAK2/NPM1/PPM1F/SMAD7/CRKL/DNAJC15/STK38/IRS2/CCNB1/SLIT2/PBK/SPRED1/CALM1/NF2/ATF3/PRKAR1A/CBFA2T3/PPP2CA/TA…	90
BP	GO:0009896	positive regulation of catabolic process	84/1785	425/18670	7.92195e-11	5.57557e-08	4.24646e-08	ARIH1/PIP4K2A/MYLIP/PTK2B/HMGB1/DDA1/FURIN/SESN3/WAC/PAFAH1B2/KHSRP/PABPC1/ZFP36L1/CPT1A/ZFP36L2/PTEN/YTHDF3/AREL1/PIM2/TRIM67/TRIM71/SOCS5/APP/CPEB3/AURKA/CAMKK2/ULK1/WWP2/CNOT6L/BTG2/EZR/TMTC3/NNT/APC2/AMER1/ROCK2/SMCR8/ADAM9/HECW2/PRKAA2/PRKCD/RNF41/IRS1/SIRT1/FBXW7/RALB/SPTLC2/KDR/SMURF1/RDX/TRIB3/ARIH2/CAV1/RAB3GAP2/UBQLN1/HSP90AA1/SMAD7/TRIM65/MTDH/IRS2/SCOC/PRKCE/SESN2/FOXO3/TIPARP/TBK1/CB…	84
BP	GO:0031331	positive regulation of cellular catabolic process	75/1785	362/18670	8.51341e-11	5.57557e-08	4.24646e-08	ARIH1/PIP4K2A/PTK2B/HMGB1/DDA1/FURIN/SESN3/WAC/PAFAH1B2/KHSRP/PABPC1/ZFP36L1/CPT1A/ZFP36L2/PTEN/YTHDF3/PIM2/TRIM67/TRIM71/SOCS5/APP/CPEB3/AURKA/CAMKK2/ULK1/CNOT6L/BTG2/EZR/TMTC3/NNT/AMER1/ROCK2/SMCR8/ADAM9/PRKAA2/PRKCD/IRS1/SIRT1/FBXW7/RALB/SPTLC2/KDR/SMURF1/RDX/TRIB3/ARIH2/CAV1/RAB3GAP2/UBQLN1/HSP90AA1/SMAD7/TRIM65/MTDH/IRS2/SCOC/SESN2/FOXO3/TBK1/CBFA2T3/TP53INP1/TNRC6A/PRKAA1/RNF14/HIF1A/ATM/SH…	75
BP	GO:0010498	proteasomal protein catabolic process	91/1785	477/18670	9.30812e-11	5.57557e-08	4.24646e-08	ARIH1/USP25/CDC34/DDA1/CCNF/WAC/ANAPC16/SKP2/PSMD3/N4BP1/FBXL3/FBXL20/AREL1/KLHL15/HSP90B1/EDEM3/FBXL13/CLOCK/SMARCC1/PSME3/CDC27/UBB/SENP1/TMEM67/YOD1/UBE2G1/TRIM71/SOCS5/ZNRF1/NHLRC3/AURKA/BTRC/WWP2/DNAJB9/TMTC3/KCTD2/TBL1XR1/USP14/DNAJC10/ARNTL/UGGT1/HECW2/PKD1/RNF41/CUL3/SIRT1/FBXW7/SIAH3/SPOP/RAD23B/UBQLN4/FOXRED2/UBE2B/UBE2H/UBR3/CD2AP/SMURF1/TRIB3/ARIH2/UBE4B/OGT/CAV1/PPP2CB/HFE/PMAIP1/TNF…	91
BP	GO:0001933	negative regulation of protein phosphorylation	84/1785	429/18670	1.29537e-10	7.05388e-08	5.37238e-08	SOCS1/GSKIP/IGF1R/PDPK1/LATS2/CYLD/ATG14/PTEN/DUSP2/ZMYND11/MLLT1/EFNA1/CDKN1A/SPRY1/PPP1R15B/SOCS5/KAT2B/DUSP4/JUN/NR2F2/SH3BP5/TFAP4/EZR/NNT/DNAJA1/PDCD4/DNAJC10/DDIT4/SMCR8/DUSP14/SEMA6A/PRKCD/ASH1L/PRKAR2A/SIRT1/CORO1C/UBE2B/BAK1/TRIB3/EPHA1/IPO5/CAV1/DMD/PIN1/CBL/RB1/CTDSP1/IPO7/PAK2/NPM1/PPM1F/SMAD7/CRKL/STK38/CCNB1/SLIT2/PBK/SPRED1/CALM1/NF2/ATF3/PRKAR1A/PPP2CA/TARBP2/MYOCD/CTDSP2/MYC/LYN/…	84
BP	GO:0060537	muscle tissue development	80/1785	408/18670	3.34213e-10	1.66762e-07	1.27009e-07	CYP26B1/FOXN2/SIX4/ARID1A/DDX39B/ACTA1/TGFBR3/PIM1/PTEN/FLOT1/SKI/TTN/SIK1/ZBTB18/TGFBR1/ITGB1/ELN/HAND1/MAPK1/FGF2/BCL9/GATA6/NR2F2/RARA/BCL9L/BTG2/GPCPD1/MEF2D/EDN1/RARB/ARNTL/RHOA/NLN/CCNT2/CALR/COL3A1/FOS/CREB1/HIVEP3/FRS2/CSRP1/ADAMTS9/VEGFA/LOX/UBE4B/CAV1/PIN1/RB1/SMAD3/FKBP1A/PHOX2B/GATA4/JARID2/SMAD7/DDX5/AKIRIN1/ACVR1/RXRA/ZFPM2/CCNB1/WNT3A/MTPN/SMAD1/KDM6B/TIPARP/ID2/ATF3/PRKAR1A/YY1/CF…	80
BP	GO:1903311	regulation of mRNA metabolic process	68/1785	324/18670	3.6192e-10	1.66762e-07	1.27009e-07	IGF2BP3/AXIN2/YWHAZ/ZBTB7A/TIRAP/PSMD3/KHSRP/PABPC1/ZFP36L1/ZFP36L2/YTHDF3/RBFOX1/SRSF6/FXR1/CELF1/PSME3/PUM2/UBB/TRIM71/SET/MBNL2/CPEB3/CNOT6L/HNRNPA0/DAZAP1/BTG2/RNPS1/PABPN1/PKP1/TNPO1/ROCK2/SREK1/PRKCD/SYNCRIP/MBNL1/FXR2/REST/YTHDC1/WTAP/IGF2BP1/NPM1/SAMD4B/PSMA2/DDX5/SERBP1/RBFOX2/NUDT21/VIM/CCNB1/YBX1/PSMA7/SON/SRSF2/HNRNPC/IGF2BP2/TNRC6A/RBM25/DYRK1A/CPEB1/CCNT1/ANGEL2/PTBP1/PSMF1/NUP98/HN…	68
BP	GO:0007179	transforming growth factor beta receptor signaling pathway	49/1785	199/18670	3.93637e-10	1.6842e-07	1.28272e-07	PPM1A/FURIN/ZBTB7A/PDPK1/LEFTY1/RNF111/LEFTY2/TGFBR3/ZEB1/SKI/TGFBR1/ACVR2A/UBB/GLG1/MTMR4/JUN/BCL9L/RHOA/FERMT2/ADAM9/SIRT1/TP53/COL3A1/FOS/CREB1/ONECUT2/SKIL/SMURF1/LOX/CAV1/PIN1/CBL/SMAD3/FOLR1/ITGA3/SMAD7/USP15/ACVR1/SMAD1/THBS1/MYOCD/ADAM17/APPL1/TGFBR2/ZFYVE9/NLK/ZNF703/CITED2/PEG10	49
BP	GO:0016570	histone modification	86/1785	454/18670	4.44332e-10	1.77437e-07	1.35139e-07	HCFC1/CPA4/MECP2/SETD5/ELK4/SETD1B/WAC/HLCS/KMT2D/ATXN7L3/PCGF3/BCOR/OTUB1/MLLT6/CRTC2/KMT2E/SKI/BAP1/CLOCK/NSD1/RPS6KA5/MSL1/HMGA2/CHEK1/MRGBP/KMT2A/ATXN7/SET/KAT2B/KDM5A/SUZ12/NACC2/AURKA/EZH1/SMARCAD1/TET3/ARID4B/TBL1XR1/DPF1/RNF2/PRKAA2/NCOA3/PRKCD/SETD1A/ASH1L/SIRT1/TP53/EZH2/BAZ2A/CARM1/MTHFR/ASXL1/YEATS4/KANSL1/REST/UBE2B/PRDM4/VEGFA/OGT/PHF19/JARID2/NAA50/KANSL1L/PPM1F/USP15/PHF8/TAF9B/CC…	86
BP	GO:0043161	proteasome-mediated ubiquitin-dependent protein catabolic process	81/1785	419/18670	5.26862e-10	1.97244e-07	1.50225e-07	ARIH1/CDC34/DDA1/CCNF/WAC/ANAPC16/SKP2/PSMD3/N4BP1/FBXL3/FBXL20/AREL1/KLHL15/HSP90B1/EDEM3/FBXL13/CLOCK/SMARCC1/PSME3/CDC27/UBB/SENP1/TMEM67/YOD1/UBE2G1/TRIM71/SOCS5/ZNRF1/NHLRC3/AURKA/BTRC/WWP2/DNAJB9/KCTD2/TBL1XR1/USP14/DNAJC10/ARNTL/HECW2/CUL3/SIRT1/FBXW7/SIAH3/SPOP/RAD23B/UBQLN4/FOXRED2/UBE2B/UBE2H/UBR3/CD2AP/SMURF1/TRIB3/ARIH2/UBE4B/OGT/CAV1/PPP2CB/HFE/TNFAIP1/UBQLN1/SMAD7/PSMA2/FBXL7/UBXN2A…	81
BP	GO:0048762	mesenchymal cell differentiation	52/1785	220/18670	5.60456e-10	1.97478e-07	1.50403e-07	AXIN2/HAS2/PAX2/TGFBR3/PTEN/TGFBR1/PDCD6/HMGA2/EFNA1/SPRY1/MAPK1/BCL9L/FN1/AMER1/PDCD4/EDN1/CLASP1/SEMA6A/SEMA4C/EZH2/CORO1C/RDH10/TCF7L2/TMEM100/WNT4/SMAD3/PHOX2B/EFNB1/PHACTR4/FOLR1/SMAD7/KLHL12/SIX2/DDX5/ACVR1/PDPN/SNAI2/PPP2CA/JAG1/LOXL2/HIF1A/FBXL17/SEMA6D/TGFBR2/NOTCH1/HNRNPAB/PITX2/ZNF703/LRP6/FOXF2/SEMA7A/RBPJ	52
BP	GO:0016569	covalent chromatin modification	88/1785	474/18670	7.97308e-10	2.65326e-07	2.02078e-07	HCFC1/CPA4/MECP2/SETD5/ELK4/SETD1B/WAC/HLCS/KMT2D/ATXN7L3/PCGF3/BCOR/OTUB1/MLLT6/CRTC2/KMT2E/SKI/BAP1/MBD2/CLOCK/NSD1/RPS6KA5/MSL1/HMGA2/CHEK1/MRGBP/KMT2A/ATXN7/SET/KAT2B/KDM5A/SUZ12/NACC2/AURKA/EZH1/SMARCAD1/TET3/ARID4B/TBL1XR1/DPF1/RNF2/PRKAA2/NCOA3/PRKCD/SETD1A/ASH1L/SIRT1/TP53/EZH2/BAZ2A/CARM1/MTHFR/ASXL1/YEATS4/KANSL1/REST/UBE2B/PRDM4/VEGFA/OGT/PHF19/DNMT3A/JARID2/NAA50/KANSL1L/PPM1F/USP15/P…	88
BP	GO:0007409	axonogenesis	87/1785	468/18670	9.31292e-10	2.93602e-07	2.23613e-07	PIK3R1/SLC9A6/NDEL1/PAX2/EPHA5/DPYSL5/BDNF/LLGL1/PTEN/FLOT1/UNC5B/TRAK1/NFASC/RNF165/RTN4R/NR4A2/RPS6KA5/EFNA1/PLXNA2/ITGB1/MARK2/PLXNA1/RAB10/APP/SLITRK4/DCC/SPTBN2/MAPK1/ULK1/FN1/EZR/KIF5A/GDI1/PLXND1/RHOA/SOS1/SEMA6A/FYN/MAP2K1/RAB21/PTPRM/SEMA4C/CREB1/EPHA4/KIF5C/STMN1/PAK3/FRS2/SKIL/VEGFA/YTHDF1/GLI2/EPHA1/MAP1B/PHOX2B/EXT1/EFNB1/HSP90AA1/NPTX1/IRS2/WNT3A/PICALM/SLIT2/NFIB/CELSR3/LAMA2/FSTL4…	87
BP	GO:0014706	striated muscle tissue development	76/1785	390/18670	1.23923e-09	3.67118e-07	2.79604e-07	CYP26B1/FOXN2/SIX4/ARID1A/DDX39B/ACTA1/TGFBR3/PIM1/PTEN/FLOT1/SKI/TTN/SIK1/ZBTB18/TGFBR1/ITGB1/ELN/HAND1/MAPK1/FGF2/BCL9/GATA6/NR2F2/RARA/BCL9L/BTG2/GPCPD1/MEF2D/EDN1/RARB/ARNTL/RHOA/NLN/CCNT2/CALR/FOS/CREB1/HIVEP3/FRS2/ADAMTS9/VEGFA/LOX/UBE4B/CAV1/PIN1/RB1/SMAD3/FKBP1A/PHOX2B/GATA4/JARID2/SMAD7/DDX5/AKIRIN1/ACVR1/RXRA/ZFPM2/CCNB1/WNT3A/MTPN/SMAD1/KDM6B/ID2/ATF3/PRKAR1A/YY1/CFL2/DSG2/MYOCD/PRKAA1…	76
BP	GO:0048732	gland development	82/1785	434/18670	1.28706e-09	3.67118e-07	2.79604e-07	HOXA3/RARG/NPHP3/SIX4/ASCL1/DDX39B/SIX3/ETS1/TGFBR3/PTEN/CLDN1/HOXA9/SALL1/TGFBR1/ETV5/IGF2R/SMARCC1/PLXNA1/SEC63/JUN/MAPK1/AURKA/BTRC/RREB1/GATA6/PHB2/RARA/ARF6/RARB/PLAG1/PLXND1/TFCP2L1/PKD1/ASH1L/MAP2K1/CUL3/EZH2/CCND1/CREB1/FBXW7/E2F7/ASXL1/FRS2/ONECUT2/KRAS/VEGFA/GLI2/CAV1/WNT7B/WNT4/SMAD3/HFE/JARID2/IGSF3/ITGA2/CRKL/IRS2/RXRA/WNT3A/HOXD13/SNAI2/NFIB/ID2/CSF1/PCK1/ARHGAP5/HIF1A/PCNA/ATM/TGFB…	82
BP	GO:0030099	myeloid cell differentiation	78/1785	416/18670	4.65347e-09	1.26701e-06	9.64982e-07	AGO1/PIP4K2A/PTK2B/FLVCR1/PIK3R1/RARG/CCR7/ZBTB7A/TIRAP/HMGB3/ETS1/CDK6/MITF/TGFBR3/KMT2D/ZFP36L1/CLDN18/KMT2E/GABPA/HOXA9/ACVR2A/ZNF385A/SENP1/KMT2A/AGO4/HMGB2/KAT2B/APP/JUN/RARA/NOTCH2/TRAF6/OSTM1/PTBP3/SETD1A/RNF41/GLO1/SIRT1/FOS/CREB1/FBXW7/SH3PXD2A/VEGFA/LOX/RB1/SNRK/TOB2/RBFOX2/SNX10/PURB/TSPAN2/FOXO3/THBS1/ID2/HAX1/CSF1/CBFA2T3/JAG1/TNRC6A/VPS33A/ACIN1/MYC/HIF1A/KLF10/MPL/NCAPG2/LYN/TGFBR2…	78
BP	GO:0007517	muscle organ development	77/1785	410/18670	5.42278e-09	1.41228e-06	1.07562e-06	CYP26B1/FOXN2/SIX4/DDX39B/ACTA1/TGFBR3/PIM1/PTEN/FLOT1/SKI/FXR1/TTN/ZBTB18/SERP1/TGFBR1/EVC/ELN/HAND1/MAPK1/FGF2/BCL9/GATA6/NR2F2/BCL9L/BTG2/BASP1/GPCPD1/MEF2D/EDN1/ARNTL/RHOA/NLN/FGFRL1/CCNT2/SIRT1/COL3A1/FOS/CREB1/HIVEP3/FZD2/TAGLN/FRS2/LOX/CD164/UBE4B/CAV1/DMD/PIN1/RB1/SMAD3/ZNF609/FKBP1A/PHOX2B/JARID2/MKX/SMAD7/DDX5/AKIRIN1/RXRA/ZFPM2/CCNB1/WNT3A/MTPN/JPH1/ATF3/YY1/CFL2/LAMA2/MYOCD/PRKAA1/FOX…	77
BP	GO:0016050	vesicle organization	65/1785	325/18670	6.75406e-09	1.6857e-06	1.28386e-06	SAR1B/SNAPIN/TMCC1/RAB22A/SEC24A/SYT7/KIF5B/TGFA/RAB14/TMED10/ALS2CL/PDCD6/ZNF385A/AP2M1/STX17/UNC13A/RAB5B/KIF13A/VAV3/SAR1A/FAM160A2/AGFG1/PPP6R1/SEC23IP/LAPTM4B/STX16/SCARB2/AP3D1/PPP6C/CUL3/CALR/TBC1D20/CREB1/CORO1C/PI4K2B/CD2AP/CAV1/RAB1B/ANKRD28/RAB1A/FOLR1/TBPL1/KLHL12/STX6/SYNJ1/TRAPPC2/SNX10/PICALM/SEC23A/VPS39/INSIG1/SNAP25/VPS4A/F2R/WASL/CPLX1/SQSTM1/GOSR1/TMF1/ARF1/SEC24C/PAFAH1B1/VAM…	65
BP	GO:0048545	response to steroid hormone	73/1785	383/18670	7.07146e-09	1.69432e-06	1.29043e-06	NR6A1/RARG/ARID1A/ZBTB7A/SKP2/NKX2-2/ACTA1/KMT2D/ZFP36L1/NR2C2/ZFP36L2/NCOA2/CLDN1/GABRB1/UFM1/CLOCK/CREBRF/FBXO32/NR4A2/YWHAH/CDKN1A/HMGB2/NR2F2/PHB2/RARA/TFAP4/DNAJA1/EDN1/RARB/TFPI/ARNTL/CCNE1/RHOA/DDIT4/ADAM9/NCOA3/CRY2/NR3C1/CALR/SIRT1/FOS/CCND1/CARM1/KCTD6/REST/KRAS/TXNIP/ATP1A3/LOX/CAV1/WNT7B/RB1/PAQR7/DDX5/RXRB/RBFOX2/RORA/RXRA/SLIT2/ATP2B1/FOXO3/THBS1/DSG2/PCK1/RNF14/PCNA/TGFBR2/CASP3/NO…	73
BP	GO:0036293	response to decreased oxygen levels	71/1785	370/18670	8.48936e-09	1.95582e-06	1.48959e-06	PTK2B/MECP2/PSMD3/KCNK3/ETS1/MDM4/TGFBR3/ZFP36L1/PTEN/HSP90B1/NR4A2/PSME3/UBB/BACH1/AHCY/GATA6/PHB2/EDN1/TMBIM6/ROCK2/RHOA/DDIT4/APAF1/SIRT1/TP53/CREB1/MTHFR/NPEPPS/REST/VEGFA/CAV1/PIN1/DNMT3A/CBL/SMAD3/PMAIP1/UBQLN1/ITGA2/PSMA2/PRKCE/RORA/CCNB1/FOXO3/SLC2A1/PSMA7/THBS1/NAMPT/CBFA2T3/LOXL2/MYOCD/PCK1/PRKAA1/ADAM17/MYC/HIF1A/CPEB1/MPL/ATM/PSMF1/TGFBR2/LIMD1/CASP3/CUL2/NOTCH1/SIRT4/HYOU1/NFE2L2/CYG…	71
BP	GO:0051656	establishment of organelle localization	75/1785	401/18670	1.02866e-08	2.28211e-06	1.7381e-06	KPNB1/RRS1/SAR1B/YWHAZ/SNAPIN/NDEL1/ARHGAP21/PDPK1/SEC24A/LLGL1/KIF5B/TGFA/TMED10/ESPL1/TRAK1/SUN2/CEP120/PDCD6/KIF23/UBB/UNC13D/SPRY1/CDT1/ACTR2/MYO5A/KIF13A/SAR1A/STARD3/EZR/KIF5A/PPP6R1/SEC23IP/CLASP1/AP3D1/PPP6C/CUL3/TBC1D20/ADORA2B/KIF5C/UBE2B/BICD2/RAB1B/MAP1B/CBL/CENPQ/KIF3B/ANKRD28/RAB1A/FOLR1/NPM1/KLHL12/SYNJ1/TRAPPC2/CCNB1/PICALM/ACTR1A/SEC23A/MYO1C/VPS4A/HIF1A/WASL/DOCK7/VAMP8/ATM/GOSR…	75
BP	GO:0022604	regulation of cell morphogenesis	86/1785	484/18670	1.08632e-08	2.32396e-06	1.76997e-06	PTK2B/NDEL1/HAS2/BDNF/CAPRIN2/CPNE5/PTEN/TRAK1/DNMBP/CDC42SE1/RTN4R/LIMS1/UNC13D/EFNA1/YWHAH/AGO4/PLXNA2/MARK2/ACTR2/PLXNA1/UNC13A/RHOC/DCC/CAPRIN1/RND3/RREB1/BCL9L/FN1/EZR/MYO10/FBXW8/RNF157/RHOBTB3/GDI1/PLXND1/RHOA/FERMT2/SEMA6A/HECW2/FYN/MAP2K1/RAB21/SEMA4C/CALR/CORO1C/EPHA4/PAK3/WASF3/KDR/SKIL/VEGFA/SMURF1/RDX/YTHDF1/DLC1/MAP1B/ITSN2/RHOB/CRKL/ARHGAP15/CDC42SE2/WNT3A/SLIT2/BRWD1/PDPN/RCC2/PTP…	86
BP	GO:0001666	response to hypoxia	69/1785	359/18670	1.28432e-08	2.65279e-06	2.02042e-06	PTK2B/MECP2/PSMD3/KCNK3/ETS1/MDM4/TGFBR3/ZFP36L1/PTEN/HSP90B1/NR4A2/PSME3/UBB/BACH1/AHCY/GATA6/PHB2/EDN1/TMBIM6/ROCK2/RHOA/DDIT4/APAF1/SIRT1/TP53/CREB1/MTHFR/NPEPPS/REST/VEGFA/CAV1/PIN1/DNMT3A/SMAD3/PMAIP1/UBQLN1/ITGA2/PSMA2/PRKCE/RORA/CCNB1/FOXO3/SLC2A1/PSMA7/THBS1/CBFA2T3/LOXL2/MYOCD/PCK1/PRKAA1/ADAM17/MYC/HIF1A/CPEB1/MPL/ATM/PSMF1/TGFBR2/LIMD1/CASP3/CUL2/NOTCH1/SIRT4/HYOU1/NFE2L2/CYGB/CPEB2/CI…	69
BP	GO:0000209	protein polyubiquitination	62/1785	310/18670	1.50045e-08	2.99589e-06	2.28173e-06	ARIH1/MYLIP/CDC34/CCNF/ANAPC13/ZNRF2/SKP2/PSMD3/RNF111/FBXL3/PELI3/OTUB1/FBXL20/LONRF1/AREL1/RNF165/FBXL13/FBXO32/PSME3/UBE2V1/CDC27/UBB/TNKS2/UBE2G1/UBE3C/TRIM71/ZNRF1/NHLRC3/BTRC/WWP2/TRIM44/FBXW8/TRAF6/HECW2/RNF41/CUL3/FBXW7/NPEPPS/UBE2B/UBE2H/SMURF1/RBBP6/TRIM5/ARIH2/UBE4B/CBL/FBXO41/PSMA2/FBXL7/UBE2D2/ANAPC7/PSMA7/ZFP91/FBXO11/RNF14/FBXL17/UBE2A/PSMF1/FOXF2/UNKL/UBE4A/FBXL18	62
BP	GO:0010948	negative regulation of cell cycle process	69/1785	361/18670	1.62156e-08	3.13328e-06	2.38637e-06	CCNF/CBX5/PSMD3/PHC3/CDK6/WEE1/MDM4/ZFP36L1/NME6/ZFP36L2/PTEN/ESPL1/TAOK1/E2F6/SLFN11/ZNF385A/PSME3/HMGA2/CHEK1/TMEM67/CDKN1A/CDT1/KAT2B/SUZ12/NACC2/CCNK/AURKA/SMC1A/CNOT6L/TFAP4/CASP2/BTG2/RBL1/ZNF207/RNF2/DCUN1D3/APAF1/RRM2/CALR/TP53/EZH2/CCND1/FBXW7/TFDP2/CARM1/E2F7/MAX/RB1/PHOX2B/CTDSP1/NPM1/PSMA2/FBXL7/RFWD3/FOXN3/CCNB1/PSMA7/PRKAR1A/VPS4A/CDK2AP2/CTDSP2/CBX3/ZNF268/BUB3/PCNA/ATM/CTDSPL/PSMF…	69
BP	GO:1901990	regulation of mitotic cell cycle phase transition	80/1785	444/18670	1.88442e-08	3.52739e-06	2.68653e-06	MECP2/ANAPC16/PSMD3/CEP135/CDK6/WEE1/MDM4/ZFP36L1/ZFP36L2/PTEN/KMT2E/ESPL1/TAOK1/SLFN11/ZNF385A/PSME3/HMGA2/CDC27/TUBB4A/CDKN1A/CDT1/APP/NACC2/AURKA/CDC25A/BTRC/CCND2/CNOT6L/PHB2/YWHAE/TFAP4/CASP2/BTG2/RBL1/CCNE1/CLASP1/PPP1R9B/LSM11/ZNF207/HECW2/DCUN1D3/PKD1/CUL3/TP53/EZH2/CCND1/TFDP2/MAPRE1/CARM1/E2F7/RDX/RB1/PHOX2B/CTDSP1/HSP90AA1/PSMA2/FBXL7/RFWD3/FOXN3/CCNB1/ACTR1A/BRD4/ANAPC7/PSMA7/DDX3X/ID…	80
BP	GO:0007050	cell cycle arrest	51/1785	237/18670	2.40152e-08	4.26937e-06	3.25164e-06	PPM1A/PRKAB2/CDK6/MDM4/CAB39/KMT2E/TGFBR1/ZNF385A/HMGA2/HBP1/CDKN1A/KAT2B/CCNK/AURKA/GATA6/CNOT6L/TFAP4/CASP2/BTG2/NOTCH2/STRADB/PPP1R9B/NEUROD1/PRKAA2/PKD1/MAP2K1/CALR/TP53/CCND1/TFDP2/CARM1/E2F7/WHAMM/TCF7L2/EIF4G2/SKIL/UHRF2/RB1/SMAD3/PHOX2B/CCNB1/ZBTB49/THBS1/ID2/TP53INP1/PRKAA1/MYC/ZNF268/PCNA/ATM/NOTCH1	51
BP	GO:0070482	response to oxygen levels	73/1785	394/18670	2.42335e-08	4.26937e-06	3.25164e-06	PTK2B/MECP2/PSMD3/KCNK3/ETS1/MDM4/TGFBR3/ZFP36L1/PTEN/HSP90B1/NR4A2/PSME3/UBB/BACH1/CDKN1A/AHCY/GATA6/PHB2/EDN1/TMBIM6/ROCK2/RHOA/DDIT4/APAF1/SIRT1/TP53/CREB1/MTHFR/NPEPPS/REST/VEGFA/CAV1/PIN1/DNMT3A/CBL/SMAD3/PMAIP1/UBQLN1/ITGA2/PSMA2/PRKCE/RORA/CCNB1/FOXO3/SLC2A1/PSMA7/THBS1/NAMPT/CBFA2T3/LOXL2/MYOCD/PCK1/PRKAA1/ADAM17/MYC/HIF1A/CPEB1/MPL/ATM/PSMF1/TGFBR2/LIMD1/CASP3/CUL2/NOTCH1/SIRT4/HYOU1/NFE…	73
BP	GO:0042176	regulation of protein catabolic process	71/1785	381/18670	2.95591e-08	5.05883e-06	3.85291e-06	ARIH1/USP25/MYLIP/PTK2B/DDA1/FURIN/WAC/PSMD3/MDM4/N4BP1/PTEN/FBXL20/AREL1/SMARCC1/PSME3/TRIM67/UBB/SENP1/EFNA1/YOD1/SOCS5/AURKA/BTRC/WWP2/SNX12/EZR/TMTC3/APC2/AMER1/LAPTM4B/USP14/ARNTL/ADAM9/HECW2/PKD1/FYN/RNF41/FBXW7/EPHA4/RAD23B/UBQLN4/GRIN2A/SMURF1/RDX/TRIB3/ARIH2/OGT/CAV1/PIN1/SMAD3/HFE/UBQLN1/HSP90AA1/SMAD7/UBXN2A/PBK/TIPARP/CBFA2T3/LPCAT1/RNF14/TMF1/PSMF1/TIMP3/SH3D19/LRIG2/SF3B3/NFE2L2/MSN…	71
BP	GO:1901987	regulation of cell cycle phase transition	84/1785	480/18670	3.27651e-08	5.45175e-06	4.15217e-06	MECP2/SIX3/ANAPC16/PSMD3/CEP135/CDK6/WEE1/MDM4/ZFP36L1/ZFP36L2/PTEN/KMT2E/ESPL1/TAOK1/SLFN11/ZNF385A/PSME3/HMGA2/CDC27/CHEK1/TUBB4A/CDKN1A/CDT1/APP/NACC2/AURKA/CDC25A/BTRC/CCND2/CNOT6L/PHB2/YWHAE/TFAP4/CASP2/BTG2/RBL1/CCNE1/CLASP1/PPP1R9B/LSM11/ZNF207/HECW2/DCUN1D3/PKD1/CUL3/TP53/EZH2/CCND1/FBXW7/TFDP2/MAPRE1/CARM1/E2F7/RDX/RB1/PHOX2B/CTDSP1/NPM1/HSP90AA1/PSMA2/FBXL7/RFWD3/FOXN3/CCNB1/ACTR1A/BRD4…	84
BP	GO:0002064	epithelial cell development	46/1785	207/18670	4.15667e-08	6.7293e-06	5.12517e-06	LRTOMT/RARG/SIX3/PDPK1/B4GALT1/FNDC3A/CDK6/NKX2-2/CLDN1/CLOCK/RFX3/CDKN1A/RARA/ARID4B/EZR/RAB13/RARB/ARNTL/ROCK2/TFCP2L1/TBC1D20/RAP2C/FRS2/ONECUT2/VEGFA/RDX/PDGFB/WNT7B/PODXL/YIPF6/VIM/RAP1B/SIDT2/JAG1/MARVELD2/RAPGEF2/HIF1A/NOTCH1/PDE4D/COL4A4/PAFAH1B1/MSN/FASN/BCL11B/F2RL1/VEZF1	46
BP	GO:0006469	negative regulation of protein kinase activity	50/1785	235/18670	4.81633e-08	7.59206e-06	5.78227e-06	SOCS1/GSKIP/IGF1R/PDPK1/LATS2/PTEN/DUSP2/MLLT1/CDKN1A/SPRY1/SOCS5/KAT2B/DUSP4/NR2F2/SH3BP5/TFAP4/DNAJA1/PDCD4/SMCR8/DUSP14/PRKCD/PRKAR2A/SIRT1/CORO1C/TRIB3/EPHA1/IPO5/CAV1/CBL/RB1/IPO7/PAK2/NPM1/PPM1F/STK38/SPRED1/NF2/PRKAR1A/PPP2CA/TARBP2/MYOCD/LYN/SPRY4/PTPRJ/CASP3/LRP6/EPHB2/SRCIN1/ITPRIP/DBNDD2	50
BP	GO:0051648	vesicle localization	45/1785	202/18670	5.37836e-08	8.26061e-06	6.29145e-06	SAR1B/SNAPIN/NDEL1/SEC24A/KIF5B/TGFA/PTEN/TMED10/TRAK1/PDCD6/KIF23/MYO5A/KIF13A/SAR1A/STARD3/KIF5A/PPP6R1/SEC23IP/CLASP1/AP3D1/PPP6C/CUL3/TBC1D20/KIF5C/RAB1B/KIF3B/ANKRD28/RAB1A/FOLR1/KLHL12/SYNJ1/TRAPPC2/PICALM/SEC23A/MYO1C/VPS33A/WASL/GOSR1/FYCO1/ARF1/KIF3A/SEC24C/PAFAH1B1/NLGN2/ARFGAP2	45
BP	GO:0034976	response to endoplasmic reticulum stress	57/1785	285/18670	5.66867e-08	8.41641e-06	6.41011e-06	USP25/PIK3R1/GFPT1/FLOT1/TNFRSF10B/ATP2A2/HSP90B1/PARP16/EDEM3/KLHDC3/SERP1/UFM1/CREBRF/SSR1/HDGF/TMEM67/YOD1/PPP1R15B/JUN/DNAJB9/TMTC3/TMEM33/TMEM117/ATF6B/USP14/DNAJC10/TMBIM6/UGGT1/APAF1/CALR/SIRT1/TP53/CCND1/PDIA6/FOXRED2/BAK1/CFTR/TRIB3/UBE4B/CAV1/CANX/PPP2CB/PMAIP1/UBQLN1/ALOX15/SESN2/EXTL3/THBS1/CHAC1/ATF3/HM13/CTDSP2/CREB3L2/HYOU1/NFE2L2/UBE4A/ATXN3	57
BP	GO:0033673	negative regulation of kinase activity	53/1785	257/18670	5.76081e-08	8.41641e-06	6.41011e-06	SOCS1/GSKIP/IGF1R/PDPK1/LATS2/PTEN/DUSP2/MLLT1/CDKN1A/SPRY1/SOCS5/KAT2B/DUSP4/NR2F2/SH3BP5/TFAP4/DNAJA1/PDCD4/SMCR8/DUSP14/PRKCD/PRKAR2A/SIRT1/CORO1C/TRIB3/EPHA1/IPO5/CAV1/CBL/RB1/IPO7/PAK2/NPM1/PPM1F/STK38/IRS2/SPRED1/NF2/PRKAR1A/PPP2CA/TARBP2/MYOCD/MIDN/LYN/SPRY4/PTPRJ/CASP3/LRP6/EPHB2/HNRNPU/SRCIN1/ITPRIP/DBNDD2	53
BP	GO:0045787	positive regulation of cell cycle	71/1785	389/18670	6.99596e-08	9.97757e-06	7.59912e-06	HCFC1/MECP2/ASCL1/DDX39B/MDM4/TGFA/RAB11FIP4/KMT2E/ESPL1/CEP120/ZNF385A/HMGA2/KIF23/CHEK1/CDKN1A/CDT1/APP/CCNK/AURKA/CDC25A/CCND2/GATA6/CNOT6L/PHB2/RARA/TFAP4/CASP2/BTG2/EDN1/CCNE1/ROCK2/RHOA/LSM11/PKD1/CCNT2/CUL3/CALR/TP53/CCNY/EZH2/CCND1/TFDP2/CARM1/E2F7/UBE2B/UHRF2/RDX/PDGFB/IL1A/WNT4/RB1/PHOX2B/KIF3B/NPM1/PRKCE/CCNB1/BRD4/DDX3X/ID2/RCC2/PLRG1/ADAM17/ZNF268/CCNT1/PCNA/ATM/LRP6/PAFAH1B1/MAPRE3/…	71
BP	GO:0051650	establishment of vesicle localization	42/1785	184/18670	7.18218e-08	1.00049e-05	7.61997e-06	SAR1B/SNAPIN/NDEL1/SEC24A/KIF5B/TGFA/TMED10/TRAK1/PDCD6/KIF23/MYO5A/KIF13A/SAR1A/STARD3/KIF5A/PPP6R1/SEC23IP/CLASP1/AP3D1/PPP6C/CUL3/TBC1D20/KIF5C/RAB1B/KIF3B/ANKRD28/RAB1A/FOLR1/KLHL12/SYNJ1/TRAPPC2/PICALM/SEC23A/MYO1C/WASL/GOSR1/FYCO1/ARF1/KIF3A/SEC24C/PAFAH1B1/ARFGAP2	42
BP	GO:0071496	cellular response to external stimulus	64/1785	339/18670	8.58825e-08	1.16907e-05	8.90387e-06	GLUL/SESN3/SKP2/GABARAPL1/PIM1/MTMR3/ATG14/TNFRSF10B/HSP90B1/SIK1/NR4A2/CHEK1/CDKN1A/JUN/MAPK1/ULK1/CASP2/FNIP1/SLC1A2/PPP1R9B/PRKAA2/FYN/SREBF2/SIRT1/TP53/FOS/ADORA2B/MAX/RALB/BAK1/MAP3K2/WNT4/CBL/MAP3K1/SLC38A2/HFE/PMAIP1/FOLR1/PPM1D/ITGA2/DNAJC15/PDK4/SESN2/ATP2B1/MTPN/SLC2A1/SNAI2/NAMPT/ATF3/WIPI2/TNRC6A/MYOCD/PCK1/PRKAA1/KLF10/SH3GLB1/LYN/MAPK8/NFE2L2/FOXO1/DAP/ATP1A1/HABP4/TLR4	64
BP	GO:1903706	regulation of hemopoiesis	82/1785	475/18670	8.78266e-08	1.16907e-05	8.90387e-06	AGO1/CYP26B1/SOCS1/PTK2B/HMGB1/PIK3R1/RARG/HMGB3/PSMD3/ETS1/CYLD/CDK6/MITF/PIM1/ZEB1/KMT2D/ZFP36L1/ZFP36L2/CLDN18/KMT2E/GABPA/HOXA9/ACVR2A/PSME3/SENP1/KMT2A/MIXL1/AGO4/HMGB2/SOCS5/KAT2B/JUN/RUNX3/RARA/NOTCH2/FNIP1/TRAF6/RHOA/SOS1/SETD1A/RNF41/AP3D1/NFAM1/FOS/CREB1/FBXW7/GLI2/LOX/RB1/SMAD7/PSMA2/CCR2/TOB2/RBFOX2/NUDT21/PURB/SOX13/FOXO3/PSMA7/THBS1/ID2/DPF2/HAX1/CSF1/JAG1/TNRC6A/ACIN1/MYC/HIF1A/KLF…	82
BP	GO:0051099	positive regulation of binding	41/1785	179/18670	9.25118e-08	1.20466e-05	9.17497e-06	HOXA3/HMGB1/TIRAP/BDNF/CAPRIN2/FLOT1/SKI/MBD2/HMGA2/HMGB2/CDT1/APP/RARA/ARF6/TRAF6/PLXND1/NEUROD1/PKD1/HMBOX1/EPHA4/MAPRE1/RALB/STMN1/TCF7L2/TRIB3/CAV1/PIN1/RB1/FKBP1A/PPP2CB/HFE/CTBP2/ITGA2/STK4/WNT3A/PPP2CA/MYOCD/RAPGEF2/PYGO2/CEBPG/MAPRE3	41
BP	GO:0034248	regulation of cellular amide metabolic process	82/1785	476/18670	9.64029e-08	1.22862e-05	9.35745e-06	AGO1/IGF2BP3/PTK2B/PDP2/MKNK2/DDX39B/ZNF706/PDPR/KHSRP/PABPC1/CAPRIN2/ZFP36L1/DPH2/ZFP36L2/BCL3/YTHDF3/RPS6KA3/FXR1/TMED10/CELF1/SERP1/ZNF385A/PUM2/SECISBP2L/EFNA1/AGO4/PPP1R15B/TRIM71/APP/CAPRIN1/MAPK1/CPEB3/CNOT6L/RARA/BTG2/ROCK2/RHOA/PRKCD/ORMDL2/LSM14A/CALR/MRPS27/EPHA4/SYNCRIP/CNBP/PA2G4/FXR2/EIF4G2/YTHDF1/IGF2BP1/PIN1/PURA/NPM1/SAMD4B/ITGA2/PDK4/EIF5A2/RXRA/VIM/SESN2/PICALM/ENC1/UNK/FOXO3/M…	82
BP	GO:0001667	ameboidal-type cell migration	80/1785	462/18670	1.10398e-07	1.34101e-05	1.02134e-05	GLUL/PTK2B/HMGB1/MECP2/CCBE1/PDPK1/HAS2/ETS1/MAP2K5/PTEN/AKAP12/TGFBR1/AMOTL2/PDCD6/MIXL1/EFNA1/ITGB1/AMOT/JUN/FGF2/RREB1/NR2F2/MAP3K3/ITGB3/FN1/RAB13/ARF6/EDN1/SP1/CLASP1/MAPRE2/PLXND1/AMOTL1/ROCK2/RHOA/ADAM9/SEMA6A/PTPRM/SEMA4C/CALR/SIRT1/FBXW7/CORO1C/BAG4/PIP5K1A/PAK3/KDR/ADAMTS9/VEGFA/PDGFB/PHOX2B/EFNB1/PHACTR4/FOLR1/PPM1F/ITGA3/RHOB/ITGA2/CARD10/PRKCE/ACVR1/AKT3/SLIT2/SPRED1/THBS1/RCC2/LOXL2…	80
BP	GO:0034504	protein localization to nucleus	53/1785	262/18670	1.11607e-07	1.34101e-05	1.02134e-05	GLUL/KPNA2/KPNB1/RRS1/PIK3R1/SIX4/ZBTB7A/SIX3/BCL3/KPNA1/CLDN18/SUN2/CDKN1A/TNPO2/MAPK1/TOR1AIP2/OSBPL8/PHB2/YWHAE/TAF8/MORC3/NPAP1/RANBP6/KPNA6/ARNTL/NUP50/TNPO1/FYN/PRKCD/FAM53C/CALR/TP53/NUP153/TXNIP/CD2AP/IPO5/PIN1/SMAD3/IPO7/SIX2/CARD10/OTUD7B/RANBP2/CTDNEP1/SESN2/NXT2/NF2/PLRG1/APPL1/NUP98/HNRNPU/FGF9/NGFR	53
BP	GO:0071383	cellular response to steroid hormone stimulus	51/1785	248/18670	1.11937e-07	1.34101e-05	1.02134e-05	NR6A1/RARG/ARID1A/ZBTB7A/SKP2/KMT2D/ZFP36L1/NR2C2/ZFP36L2/UFM1/CLOCK/CREBRF/FBXO32/NR4A2/YWHAH/NR2F2/PHB2/RARA/TFAP4/DNAJA1/EDN1/RARB/TFPI/ARNTL/CCNE1/RHOA/DDIT4/NCOA3/CRY2/NR3C1/CALR/SIRT1/CARM1/KCTD6/REST/ATP1A3/RB1/PAQR7/DDX5/RXRB/RBFOX2/RORA/RXRA/ATP2B1/FOXO3/PCK1/RNF14/HNRNPU/FOXO1/THRB/ATP1A1	51
BP	GO:0007178	transmembrane receptor protein serine/threonine kinase signaling pathway	65/1785	349/18670	1.15202e-07	1.35306e-05	1.03052e-05	PPM1A/FURIN/ZBTB7A/PDPK1/LEFTY1/RNF111/LEFTY2/TGFBR3/ZEB1/SKI/RNF165/TGFBR1/ACVR2A/UBB/GLG1/BMP3/MTMR4/PPM1L/JUN/BCL9L/CHRDL1/PDCD4/RHOA/FERMT2/ADAM9/SIRT1/TP53/COL3A1/FOS/CREB1/ONECUT2/SKIL/SMURF1/LOX/TMEM100/CAV1/RGMB/PIN1/CBL/SMAD3/FKBP1A/GATA4/HFE/ZNF8/FOLR1/ITGA3/SMAD7/DDX5/USP15/ACVR1/VIM/SMAD1/THBS1/MYOCD/ADAM17/APPL1/TGFBR2/NOTCH1/ZFYVE9/NLK/ZNF703/FGF9/CITED2/PEG10/RBPJ	65
BP	GO:0031647	regulation of protein stability	56/1785	284/18670	1.21998e-07	1.40532e-05	1.07032e-05	HCFC1/USP25/MYLIP/PIK3R1/MDM4/PIM1/FBXL3/PTEN/FLOT1/NAPG/CRTAP/ATP1B3/HIP1/PIM2/CCDC88C/EFNA1/CDKN1A/MAPK1/AURKA/BTRC/ZSWIM7/PHB2/TRIM44/A1CF/MORC3/CDC37L1/ZNF207/PRKCD/GOLGA7/CUL3/CALR/SIRT1/TP53/CREB1/FBXW7/PTGES3/SIAH3/EPHA4/UBE2B/KRAS/PIN1/SMAD3/HSP90AA1/SMAD7/TAF9B/STK4/NAA15/NF2/B4GALT5/TNIP2/SH3GLB1/USP3/CASP3/NLK/WDR81/STXBP1	56
BP	GO:0060070	canonical Wnt signaling pathway	63/1785	335/18670	1.2516e-07	1.41454e-05	1.07734e-05	PPM1A/AXIN2/RARG/NPHP3/GSKIP/RECK/CTNND1/LATS2/PSMD3/CYLD/MITF/CSNK1G2/CAPRIN2/PTEN/GPC5/NR4A2/PSME3/TNKS2/BTRC/BCL9/BCL9L/APC2/AMER1/TBL1XR1/ARNTL/FZD6/ZNRF3/CUL3/FZD5/CCNY/FZD2/TCF7L2/UBE2B/TLE4/CAV1/WNT7B/WNT4/PIN1/SMAD3/FOLR1/CSNK1G3/KLHL12/PSMA2/CTDNEP1/STK4/WNT3A/FOXO3/PSMA7/DDX3X/SNAI2/TBX18/KREMEN1/PSMF1/LIMD1/NOTCH1/PYGO2/MLLT3/ZNF703/LRP6/G3BP1/FOXO1/FGF9/RBPJ	63
BP	GO:0003279	cardiac septum development	30/1785	112/18670	1.32304e-07	1.4676e-05	1.11775e-05	NPHP3/MDM4/TGFBR3/SALL1/TGFBR1/PCSK5/HAND1/GATA6/RARA/NOTCH2/RARB/PLXND1/FGFRL1/TP53/FZD2/FRS2/GATA4/SMAD7/ACVR1/ZFPM2/SLIT2/ID2/JAG1/SALL4/MATR3/TGFBR2/NOTCH1/LUZP1/CITED2/RBPJ	30
BP	GO:0009267	cellular response to starvation	36/1785	149/18670	1.35183e-07	1.47227e-05	1.12131e-05	GLUL/SESN3/GABARAPL1/MTMR3/ATG14/SIK1/CDKN1A/JUN/MAPK1/FNIP1/PRKAA2/SREBF2/SIRT1/TP53/MAX/RALB/WNT4/SLC38A2/HFE/PMAIP1/PPM1D/DNAJC15/PDK4/SESN2/SLC2A1/ATF3/WIPI2/TNRC6A/PCK1/PRKAA1/KLF10/SH3GLB1/MAPK8/NFE2L2/FOXO1/DAP	36
BP	GO:0051348	negative regulation of transferase activity	56/1785	285/18670	1.37969e-07	1.47578e-05	1.12398e-05	SOCS1/GSKIP/IGF1R/PDPK1/LATS2/PTEN/DUSP2/MLLT1/CDKN1A/SPRY1/SOCS5/KAT2B/DUSP4/NR2F2/SH3BP5/TFAP4/DNAJA1/PDCD4/SMCR8/DUSP14/PRKCD/PRKAR2A/SIRT1/TP53/CORO1C/TRIB3/EPHA1/IPO5/CAV1/CBL/RB1/IPO7/PAK2/NPM1/PPM1F/SMAD7/STK38/IRS2/SPRED1/NF2/PRKAR1A/PPP2CA/TARBP2/CERS1/MYOCD/MIDN/LYN/SPRY4/PTPRJ/CASP3/LRP6/EPHB2/HNRNPU/SRCIN1/ITPRIP/DBNDD2	56
BP	GO:0030900	forebrain development	69/1785	381/18670	1.45362e-07	1.52757e-05	1.16343e-05	ASCL1/ARID1A/NDEL1/SIX3/EPHA5/ETS1/CDK6/KIF5B/PTEN/SKI/SALL1/SUN2/RTN4R/CEP120/NR4A2/UBB/RTN4RL1/APP/NR2F2/YWHAE/RARA/EZH1/BTG2/RARB/SLC1A2/PEX13/RHOA/NEUROD1/FYN/APAF1/COL3A1/EZH2/CREB1/PHLPP2/EMX2/BTBD3/FRS2/KRAS/GLI2/DLC1/WNT7B/WNT4/IGF2BP1/SLC38A2/EXT1/CRKL/OTX1/WNT3A/SLIT2/SLC2A1/KDM6B/NFIB/SLC7A11/ID2/NF2/C21orf91/RAPGEF2/HIF1A/DOCK7/CASP3/NOTCH1/PITX2/LRP6/EPHB2/PAFAH1B1/NIN/SEMA7A/BCL11B/…	69
BP	GO:0051056	regulation of small GTPase mediated signal transduction	63/1785	338/18670	1.7469e-07	1.80413e-05	1.37406e-05	ARHGAP21/PSD3/IQSEC3/FLOT1/SSX2IP/SIPA1L2/DNMBP/CDC42SE1/RTN4R/SHOC2/TRIM67/SPRY1/ABL2/ITGB1/AMOT/RHOC/VAV3/NOTCH2/ARF6/GDI1/MAPRE2/RHOA/SOS1/CUL3/COL3A1/STMN1/ARHGAP1/KRAS/CD2AP/RDX/PLEKHG2/DLC1/OGT/CBL/PPP2CB/TNFAIP1/ITSN2/ITGA3/RHOB/CRKL/ARHGAP32/SPATA13/IRS2/ARHGAP15/CDC42SE2/SLIT2/ARHGAP42/CSF1/SIPA1L1/ARHGAP5/F2R/SQSTM1/IQSEC2/LYN/SPRY4/NOTCH1/ARHGAP12/ARHGEF3/EPOR/EPHB2/BCR/ARHGDIA/F2RL1	63
BP	GO:0048193	Golgi vesicle transport	67/1785	368/18670	1.79166e-07	1.81899e-05	1.38538e-05	SAR1B/COG6/SEC24A/LLGL1/TGFA/RAB14/RAB6C/TMED5/NAPG/TMED10/SCAMP2/PDCD6/KIF23/COG5/STX17/RAB10/MYO5A/SPTBN2/KIF13A/SLC10A7/CAPZA2/SAR1A/KIF5A/PPP6R1/SEC23IP/TMED7/GGA2/PROS1/AP3D1/GOLGA7/PPP6C/CUL3/TBC1D20/GOPC/KIF2A/WHAMM/SURF4/BICD2/SCAMP3/KDELR1/RAB1B/ERGIC1/KIF3B/ANKRD28/RAB1A/FOLR1/RER1/NRBP1/KLHL12/STX6/TEX261/CAPZA1/TRAPPC2/ACTR1A/SEC23A/INSIG1/CAPZB/CREB3L2/VAMP8/GOSR1/ARF1/GCC2/KIF3A/HYO…	67
BP	GO:0010256	endomembrane system organization	77/1785	445/18670	1.96577e-07	1.96249e-05	1.49468e-05	YWHAZ/TMCC1/NDEL1/ARHGAP21/RAB22A/SYT7/PTEN/FLOT1/TMED5/ARL6IP1/TMED10/SH3GL2/ATP2A2/SERP1/SUN2/ALS2CL/UBL4A/ZNF385A/STX17/RAB10/MYO5A/NEK9/RAB5B/MPP5/MAPK1/TOR1AIP2/FAM160A2/PACSIN1/AGFG1/TMEM33/FBXW8/SEC23IP/LAPTM4B/TMED7/CLASP1/CAMSAP2/XKR7/MICALL1/STX16/SCARB2/PRKCD/MAP2K1/AP3D1/TBC1D20/CREB1/CORO1C/WHAMM/PI4K2B/SURF4/CAV1/PLEKHM2/RAB3GAP2/RAB1A/TBPL1/MTSS1/STX6/SYNJ1/CTDNEP1/UBXN2A/SNX10/CCN…	77
BP	GO:0017015	regulation of transforming growth factor beta receptor signaling pathway	31/1785	120/18670	2.00292e-07	1.9668e-05	1.49795e-05	PPM1A/ZBTB7A/PDPK1/RNF111/TGFBR3/ZEB1/SKI/TGFBR1/UBB/GLG1/MTMR4/BCL9L/SIRT1/TP53/ONECUT2/SKIL/SMURF1/LOX/CAV1/PIN1/SMAD3/FOLR1/ITGA3/SMAD7/THBS1/MYOCD/ADAM17/TGFBR2/ZNF703/CITED2/PEG10	31
BP	GO:0050821	protein stabilization	40/1785	178/18670	2.27343e-07	2.19642e-05	1.67284e-05	HCFC1/PIK3R1/MDM4/PIM1/PTEN/FLOT1/NAPG/CRTAP/ATP1B3/HIP1/PIM2/EFNA1/CDKN1A/ZSWIM7/PHB2/TRIM44/A1CF/MORC3/CDC37L1/ZNF207/PRKCD/GOLGA7/CALR/TP53/CREB1/FBXW7/PTGES3/EPHA4/UBE2B/PIN1/SMAD3/HSP90AA1/SMAD7/TAF9B/STK4/NAA15/TNIP2/NLK/WDR81/STXBP1	40
BP	GO:0031668	cellular response to extracellular stimulus	53/1785	268/18670	2.39118e-07	2.27352e-05	1.73156e-05	GLUL/SESN3/SKP2/GABARAPL1/PIM1/MTMR3/ATG14/HSP90B1/SIK1/NR4A2/CDKN1A/JUN/MAPK1/ULK1/FNIP1/SLC1A2/PPP1R9B/PRKAA2/FYN/SREBF2/SIRT1/TP53/FOS/ADORA2B/MAX/RALB/WNT4/CBL/SLC38A2/HFE/PMAIP1/FOLR1/PPM1D/DNAJC15/PDK4/SESN2/ATP2B1/SLC2A1/SNAI2/NAMPT/ATF3/WIPI2/TNRC6A/MYOCD/PCK1/PRKAA1/KLF10/SH3GLB1/LYN/MAPK8/NFE2L2/FOXO1/DAP	53
BP	GO:0016358	dendrite development	48/1785	233/18670	2.47831e-07	2.31954e-05	1.76661e-05	MINK1/MECP2/SLC9A6/CAPRIN2/MAPK6/PTEN/TRAK1/EFNA1/YWHAH/ITGB1/ACTR2/APP/DCC/CAPRIN1/CPEB3/ARF6/PACSIN1/FBXW8/CAMSAP2/RHOA/HECW2/FYN/RAB21/EZH2/SLC12A5/EPHA4/CARM1/BTBD3/PAK3/MAP1B/PAK2/ACSL4/CRKL/RBFOX2/PICALM/CD3E/PTPRD/C21orf91/FSTL4/SIPA1L1/RAPGEF2/WASL/CELSR2/ARF1/EPHB2/PAFAH1B1/SRCIN1/CRTC1	48
BP	GO:0070507	regulation of microtubule cytoskeleton organization	41/1785	186/18670	2.80194e-07	2.58209e-05	1.96657e-05	CLIP1/MECP2/MID1IP1/CCNF/CYLD/RAB6C/TAOK1/CEP120/CHEK1/TUBB4A/TMEM67/MARK2/KAT2B/AURKA/SMC1A/SLAIN2/APC2/CLASP1/MAPRE2/CAMSAP2/ROCK2/RHOA/PRKAA2/PKD1/MAPRE1/STMN1/GBA2/BICD2/MAP1B/NPM1/WNT3A/MID1/CCSAP/PRKAA1/CDK2AP2/DYRK1A/CAMSAP1/PAFAH1B1/NIN/MAPRE3/HNRNPU	41
BP	GO:0061458	reproductive system development	75/1785	434/18670	2.97851e-07	2.64588e-05	2.01516e-05	RARG/SIX4/ARID1A/CCNF/FNDC3A/TFAP2C/HOXA10/ZFP36L1/PTEN/HOXA9/UBE2Q1/SALL1/GJB1/TGFBR1/ACVR2A/SMARCC1/UBB/AGO4/HMGB2/KDM5A/HAND1/MAPK1/GATA6/NR2F2/RARA/ARID4B/CASP2/DAZAP1/BASP1/RAB13/RHOBTB3/PLAG1/MC2R/PKD1/ASH1L/MAP2K1/FZD5/SIRT1/TBC1D20/CCND1/RDH10/E2F7/FRS2/BAK1/VEGFA/SF1/GLI2/PDGFB/WNT7B/WNT4/CBL/GATA4/CRKL/RXRA/ZFPM2/STK4/SLIT2/HOXD13/PLEKHA1/FOXO3/TIPARP/CSDE1/MYOCD/HIF1A/DLX3/ATM/TMF1/CAS…	75
BP	GO:1903844	regulation of cellular response to transforming growth factor beta stimulus	31/1785	122/18670	2.9862e-07	2.64588e-05	2.01516e-05	PPM1A/ZBTB7A/PDPK1/RNF111/TGFBR3/ZEB1/SKI/TGFBR1/UBB/GLG1/MTMR4/BCL9L/SIRT1/TP53/ONECUT2/SKIL/SMURF1/LOX/CAV1/PIN1/SMAD3/FOLR1/ITGA3/SMAD7/THBS1/MYOCD/ADAM17/TGFBR2/ZNF703/CITED2/PEG10	31
BP	GO:0051098	regulation of binding	67/1785	373/18670	3.00367e-07	2.64588e-05	2.01516e-05	HOXA3/HMGB1/SNAPIN/ZBTB7A/TIRAP/CYLD/TGFBR3/BDNF/CAPRIN2/BCL3/FLOT1/SKI/MBD2/NSD1/TGFBR1/PIM2/HMGA2/HMGB2/CDT1/MARK2/APP/NUCKS1/HAND1/JUN/AURKA/RARA/TFAP4/ARF6/TRAF6/TMBIM6/PLXND1/NEUROD1/PKD1/PRKCD/HMBOX1/FBXW7/EPHA4/MAPRE1/CARM1/RALB/STMN1/TCF7L2/BAK1/LOX/TRIB3/PDGFB/CAV1/PIN1/RB1/SMAD3/FKBP1A/PPP2CB/HFE/CTBP2/ITGA2/STK4/WNT3A/ID2/PPP2CA/MYOCD/RAPGEF2/PYGO2/BTAF1/CEBPG/MAPK8/MAPRE3/HABP4	67
BP	GO:0007568	aging	60/1785	321/18670	3.08515e-07	2.67827e-05	2.03982e-05	PAX2/CDK6/BCL2L12/PTEN/CLDN1/DNMBP/RNF165/MBD2/SERP1/LIMS1/HMGA2/CHEK1/CDKN1A/APP/SEC63/JUN/MAPK1/MAP3K3/MORC3/CASP2/RBL1/PDCD4/EDN1/MNT/ARNTL/SLC1A2/HMGA1/RSL1D1/TFCP2L1/APAF1/PRKCD/MAP2K1/CALR/SIRT1/TP53/FOS/CREB1/CARM1/PRELP/LITAF/KRAS/BAK1/DNMT3A/CANX/NPM1/AKT3/PICALM/ATP2B1/PRDM2/FOXO3/ID2/NAMPT/FOXG1/LOXL2/PCK1/PAWR/ATM/TGFBR2/PDE4D/NFE2L2	60
BP	GO:0001837	epithelial to mesenchymal transition	34/1785	141/18670	3.13801e-07	2.68524e-05	2.04513e-05	AXIN2/HAS2/TGFBR3/PTEN/TGFBR1/PDCD6/HMGA2/EFNA1/SPRY1/BCL9L/PDCD4/CLASP1/EZH2/TCF7L2/TMEM100/WNT4/SMAD3/SMAD7/KLHL12/DDX5/ACVR1/PDPN/SNAI2/PPP2CA/JAG1/LOXL2/HIF1A/TGFBR2/NOTCH1/HNRNPAB/ZNF703/LRP6/FOXF2/RBPJ	34
BP	GO:0060562	epithelial tube morphogenesis	60/1785	322/18670	3.44539e-07	2.90675e-05	2.21384e-05	RARG/NPHP3/SIX4/ARID1A/PAX2/SKI/SALL1/ETV5/SPRY1/CC2D2A/TRIM71/HAND1/BTRC/FGF2/PHB2/RARA/EDN1/TRAF6/PLXND1/RHOA/FZD6/PKD1/APAF1/SEMA4C/HHIP/EPHA4/MTHFR/RDH10/FZD2/IRX2/KRAS/VEGFA/GLI2/DLC1/WNT4/SMAD3/GATA4/PHACTR4/FOLR1/PODXL/MTSS1/RHOB/SIX2/MIB1/ACVR1/STK4/WNT3A/SLIT2/CSF1/MTHFD1L/SALL4/MYC/HIF1A/TGFBR2/CASP3/NOTCH1/VASP/LRP6/LUZP1/RBPJ	60
BP	GO:0035148	tube formation	35/1785	148/18670	3.50076e-07	2.91243e-05	2.21817e-05	RARG/NPHP3/SIX4/ARID1A/PAX2/SKI/CC2D2A/TRIM71/HAND1/RARA/DICER1/TRAF6/FZD6/APAF1/SEMA4C/MTHFR/FZD2/IRX2/VEGFA/DLC1/WNT4/PHACTR4/FOLR1/PODXL/MIB1/STK4/NFIB/MTHFD1L/SALL4/HIF1A/CASP3/NOTCH1/VASP/LRP6/LUZP1	35
BP	GO:1902903	regulation of supramolecular fiber organization	64/1785	353/18670	3.91838e-07	3.21522e-05	2.44878e-05	CLIP1/PTK2B/PIK3R1/MECP2/CCR7/MID1IP1/SH3PXD2B/TAOK1/TGFBR1/SYNPO2/TWF1/TUBB4A/ACTR2/ELN/APP/RHOC/SPTBN2/CAPZA2/SLAIN2/APC2/ARF6/EDN1/CLASP1/CAMSAP2/ROCK2/RHOA/PRKCD/LIMA1/MAPRE1/BAG4/WHAMM/STMN1/PAK3/GBA2/RDX/PLEKHG2/DLC1/EPHA1/WNT4/MAP1B/RB1/SMAD3/PPM1F/PRKCE/CAPZA1/ALOX15/SLIT2/MYO1C/MID1/MTPN/HAX1/NF2/RICTOR/CFL2/CAPZB/DYRK1A/WASL/CAMSAP1/ARF1/VASP/NIN/MAPRE3/SPIRE1/F2RL1	64
BP	GO:0045637	regulation of myeloid cell differentiation	50/1785	251/18670	4.13029e-07	3.3433e-05	2.54633e-05	AGO1/PTK2B/PIK3R1/RARG/HMGB3/ETS1/CDK6/MITF/KMT2D/ZFP36L1/CLDN18/KMT2E/GABPA/HOXA9/ACVR2A/SENP1/KMT2A/AGO4/HMGB2/KAT2B/JUN/RARA/NOTCH2/TRAF6/SETD1A/RNF41/FOS/CREB1/FBXW7/LOX/RB1/TOB2/RBFOX2/PURB/FOXO3/THBS1/ID2/HAX1/CSF1/JAG1/TNRC6A/ACIN1/MYC/HIF1A/KLF10/MPL/NCAPG2/LYN/TNRC6B/TLR4	50
BP	GO:0003007	heart morphogenesis	51/1785	259/18670	4.6025e-07	3.64425e-05	2.77553e-05	AXIN2/NPHP3/HAS2/LEFTY1/MDM4/TGFBR3/PIM1/TTN/TGFBR1/EFNA1/SPRY1/ELN/HAND1/JUN/GATA6/RARA/NOTCH2/PDCD4/RARB/PLXND1/SOS1/FGFRL1/TP53/FZD2/ASXL1/VEGFA/TMEM100/DLC1/UBE4B/SMAD3/FKBP1A/GATA4/FOLR1/SMAD7/CRKL/MIB1/ACVR1/RXRA/ZFPM2/WNT3A/SLIT2/SNAI2/ID2/JAG1/HIF1A/TGFBR2/NOTCH1/PITX2/EPHB4/CITED2/RBPJ	51
BP	GO:0048608	reproductive structure development	74/1785	431/18670	4.62376e-07	3.64425e-05	2.77553e-05	RARG/SIX4/ARID1A/CCNF/FNDC3A/TFAP2C/HOXA10/ZFP36L1/PTEN/HOXA9/SALL1/GJB1/TGFBR1/ACVR2A/SMARCC1/UBB/AGO4/HMGB2/KDM5A/HAND1/MAPK1/GATA6/NR2F2/RARA/ARID4B/CASP2/DAZAP1/BASP1/RAB13/RHOBTB3/PLAG1/MC2R/PKD1/ASH1L/MAP2K1/FZD5/SIRT1/TBC1D20/CCND1/RDH10/E2F7/FRS2/BAK1/VEGFA/SF1/GLI2/PDGFB/WNT7B/WNT4/CBL/GATA4/CRKL/RXRA/ZFPM2/STK4/SLIT2/HOXD13/PLEKHA1/FOXO3/TIPARP/CSDE1/MYOCD/HIF1A/DLX3/ATM/TMF1/CASP3/NOTC…	74
BP	GO:0046578	regulation of Ras protein signal transduction	48/1785	238/18670	4.79111e-07	3.72711e-05	2.83864e-05	PSD3/IQSEC3/FLOT1/SSX2IP/DNMBP/CDC42SE1/RTN4R/SHOC2/TRIM67/SPRY1/ABL2/ITGB1/VAV3/NOTCH2/ARF6/MAPRE2/SOS1/CUL3/COL3A1/STMN1/KRAS/RDX/PLEKHG2/DLC1/OGT/CBL/PPP2CB/TNFAIP1/ITSN2/ITGA3/CRKL/SPATA13/IRS2/CDC42SE2/ARHGAP42/CSF1/F2R/SQSTM1/IQSEC2/LYN/SPRY4/NOTCH1/ARHGEF3/EPOR/EPHB2/BCR/ARHGDIA/F2RL1	48
BP	GO:0002067	glandular epithelial cell differentiation	17/1785	46/18670	5.07098e-07	3.89425e-05	2.96594e-05	RARG/ASCL1/PDPK1/CDK6/NKX2-2/CLOCK/RFX3/GATA6/RARA/RARB/ARNTL/NEUROD1/WNT4/RXRA/RFX6/SIDT2/NOTCH1	17
BP	GO:1903747	regulation of establishment of protein localization to mitochondrion	22/1785	72/18670	5.28975e-07	4.01083e-05	3.05473e-05	YWHAZ/BAP1/YWHAH/YWHAQ/YWHAE/DNAJA1/SREBF2/FZD5/TP53/FBXW7/SIAH3/TFDP2/NPEPPS/BAG4/ARIH2/PMAIP1/HAX1/PRKAA1/SH3GLB1/SIRT4/LEPROT/MAPK8	22
BP	GO:2000045	regulation of G1/S transition of mitotic cell cycle	40/1785	184/18670	5.71612e-07	4.27994e-05	3.25969e-05	CDK6/WEE1/MDM4/PTEN/KMT2E/SLFN11/ZNF385A/PSME3/CDKN1A/NACC2/AURKA/CCND2/CNOT6L/CASP2/BTG2/RBL1/CCNE1/LSM11/DCUN1D3/PKD1/TP53/EZH2/CCND1/TFDP2/CARM1/E2F7/RDX/RB1/CTDSP1/RFWD3/CCNB1/DDX3X/ID2/PLRG1/CDK2AP2/CTDSP2/ADAM17/PCNA/ATM/CTDSPL	40
BP	GO:0042594	response to starvation	41/1785	191/18670	5.90812e-07	4.36909e-05	3.32759e-05	GLUL/SESN3/GABARAPL1/MTMR3/ATG14/SIK1/CDKN1A/JUN/MAPK1/ULK1/FNIP1/PRKAA2/SREBF2/SIRT1/TP53/MAX/RALB/WNT4/CBL/SLC38A2/HFE/PMAIP1/PPM1D/DNAJC15/PDK4/SESN2/FOXO3/SLC2A1/ATF3/WIPI2/TNRC6A/PCK1/PRKAA1/KLF10/FOXK1/SH3GLB1/MAPK8/NFE2L2/FOXO1/DAP/FOXK2	41
BP	GO:0061013	regulation of mRNA catabolic process	42/1785	199/18670	6.98106e-07	5.09455e-05	3.88011e-05	IGF2BP3/AXIN2/YWHAZ/TIRAP/PSMD3/KHSRP/PABPC1/ZFP36L1/ZFP36L2/YTHDF3/FXR1/PSME3/PUM2/UBB/TRIM71/SET/CPEB3/CNOT6L/HNRNPA0/BTG2/PKP1/TNPO1/ROCK2/PRKCD/SYNCRIP/FXR2/IGF2BP1/NPM1/SAMD4B/PSMA2/SERBP1/VIM/YBX1/PSMA7/HNRNPC/IGF2BP2/TNRC6A/ANGEL2/PSMF1/HNRNPU/PUM1/TNRC6B	42
BP	GO:0018105	peptidyl-serine phosphorylation	56/1785	299/18670	7.08347e-07	5.09455e-05	3.88011e-05	MKNK2/SGK1/PDPK1/LATS2/CSNK1G2/CAPRIN2/CAB39/RPS6KA3/NSD1/TGFBR1/RPS6KA5/SMG1/HMGA2/MARK2/APP/MAPK1/AURKA/ULK1/MORC3/FNIP1/ROCK2/DDIT4/PRKAA2/PKD1/PRKCD/BAG4/BAK1/VEGFA/PDGFB/CAV1/DMD/PAK2/CSNK1G3/HSP90AA1/PPM1F/SMAD7/STK38/PRKCE/AKT3/CCNB1/STK4/WNT3A/TLK1/HIPK1/TBK1/HAX1/RICTOR/PRKAA1/DYRK1A/DOCK7/ATM/TGFBR2/CLSPN/PDE4D/NLK/MAPK8	56
BP	GO:0006900	vesicle budding from membrane	27/1785	102/18670	7.14428e-07	5.09455e-05	3.88011e-05	SAR1B/SEC24A/TGFA/TMED10/PDCD6/AP2M1/SAR1A/PPP6R1/SEC23IP/AP3D1/PPP6C/CUL3/TBC1D20/RAB1B/ANKRD28/RAB1A/FOLR1/KLHL12/TRAPPC2/PICALM/SEC23A/INSIG1/VPS4A/WASL/ARF1/SEC24C/ARFGAP2	27
BP	GO:0018209	peptidyl-serine modification	59/1785	322/18670	7.69322e-07	5.42146e-05	4.12909e-05	MKNK2/SGK1/PDPK1/LATS2/CSNK1G2/CAPRIN2/CAB39/RPS6KA3/NSD1/TGFBR1/RPS6KA5/SMG1/HMGA2/MARK2/APP/MAPK1/AURKA/ULK1/MORC3/FNIP1/ROCK2/DDIT4/GALNT3/PRKAA2/PKD1/PRKCD/MGAT5B/BAG4/BAK1/VEGFA/PDGFB/CAV1/DMD/GALNT1/PAK2/CSNK1G3/HSP90AA1/PPM1F/SMAD7/STK38/PRKCE/AKT3/CCNB1/STK4/WNT3A/TLK1/HIPK1/TBK1/HAX1/RICTOR/PRKAA1/DYRK1A/DOCK7/ATM/TGFBR2/CLSPN/PDE4D/NLK/MAPK8	59
BP	GO:0016239	positive regulation of macroautophagy	21/1785	68/18670	7.84098e-07	5.45379e-05	4.15372e-05	PIP4K2A/SESN3/WAC/PAFAH1B2/PIM2/ULK1/SMCR8/PRKAA2/SIRT1/RALB/SPTLC2/KDR/SMURF1/RAB3GAP2/SCOC/SESN2/TBK1/HIF1A/SH3GLB1/FYCO1/SPTLC1	21
BP	GO:0030522	intracellular receptor signaling pathway	53/1785	278/18670	7.9212e-07	5.45379e-05	4.15372e-05	CYP26B1/NR6A1/RARG/ARID1A/ZBTB7A/SKP2/CYLD/PIM1/KMT2D/UFM1/CLOCK/RIOK3/NR4A2/UBE2V1/PUM2/UBB/ZCCHC3/YWHAH/NR2F2/PHB2/RARA/DNAJA1/RARB/TRAF6/ARNTL/CCNE1/RHOA/NCOA3/CRY2/LSM14A/NR3C1/CALR/SIRT1/EZH2/CARM1/KCTD6/ASXL1/RB1/CTBP2/CRKL/DDX5/RXRB/RBFOX2/RORA/RXRA/ALOX15/SNAI2/RNF14/TAB2/PUM1/CITED2/THRB/TLR4	53
BP	GO:0032984	protein-containing complex disassembly	59/1785	323/18670	8.55324e-07	5.82204e-05	4.43418e-05	MRPL17/MID1IP1/ARID1A/SNAPIN/SMARCE1/IGF1R/GABARAPL1/KIF5B/ATG14/SH3GL2/TAOK1/MRPS23/SMARCC1/TWF1/STX17/MRPS16/SET/SMARCD1/SPTBN2/CAPZA2/APC2/AMER1/CLASP1/HMGA1/CAMSAP2/DDIT4/SMCR8/FZD5/LIMA1/MRPS27/FZD2/UBQLN4/KIF2A/STMN1/LIX1L/RDX/CAV1/MAP1B/UBQLN1/TBC1D25/SYNJ1/CAPZA1/EIF5A2/WNT3A/SUPT16H/MID1/MTPN/CCSAP/VPS4A/CFL2/VPS33A/CAPZB/MYC/VAMP8/CAMSAP1/FYCO1/MRPL34/LRP6/F2RL1	59
BP	GO:0007044	cell-substrate junction assembly	26/1785	97/18670	8.78777e-07	5.84875e-05	4.45453e-05	PTK2B/PDPK1/PTEN/LIMS1/LAMC1/FN1/CLASP1/ROCK2/RHOA/FERMT2/CORO1C/WHAMM/PIP5K1A/KDR/VEGFA/DLC1/WNT4/SMAD3/PPM1F/ITGA2/CD151/THBS1/RCC2/PLEC/PTPRJ/BCR	26
BP	GO:0150115	cell-substrate junction organization	26/1785	97/18670	8.78777e-07	5.84875e-05	4.45453e-05	PTK2B/PDPK1/PTEN/LIMS1/LAMC1/FN1/CLASP1/ROCK2/RHOA/FERMT2/CORO1C/WHAMM/PIP5K1A/KDR/VEGFA/DLC1/WNT4/SMAD3/PPM1F/ITGA2/CD151/THBS1/RCC2/PLEC/PTPRJ/BCR	26
BP	GO:0010770	positive regulation of cell morphogenesis involved in differentiation	35/1785	154/18670	9.57384e-07	6.3019e-05	4.79965e-05	NDEL1/HAS2/BDNF/CAPRIN2/TRAK1/LIMS1/UNC13D/PLXNA2/ACTR2/PLXNA1/CAPRIN1/RREB1/FN1/FBXW8/GDI1/PLXND1/RHOA/MAP2K1/RAB21/CALR/EPHA4/PAK3/SKIL/VEGFA/MAP1B/CRKL/WNT3A/SLIT2/PTPRD/MPL/PAFAH1B1/NIN/ARHGDIA/SEMA7A/NGFR	35
BP	GO:1902806	regulation of cell cycle G1/S phase transition	42/1785	202/18670	1.0595e-06	6.89824e-05	5.25384e-05	CDK6/WEE1/MDM4/PTEN/KMT2E/SLFN11/ZNF385A/PSME3/CDKN1A/NACC2/AURKA/CCND2/CNOT6L/PHB2/CASP2/BTG2/RBL1/CCNE1/LSM11/DCUN1D3/PKD1/TP53/EZH2/CCND1/FBXW7/TFDP2/CARM1/E2F7/RDX/RB1/CTDSP1/RFWD3/CCNB1/DDX3X/ID2/PLRG1/CDK2AP2/CTDSP2/ADAM17/PCNA/ATM/CTDSPL	42
BP	GO:0030111	regulation of Wnt signaling pathway	64/1785	363/18670	1.07443e-06	6.92027e-05	5.27062e-05	PPM1A/AXIN2/NPHP3/GSKIP/RECK/TAX1BP3/SIX3/CTNND1/LATS2/PSMD3/CYLD/CSNK1G2/CAPRIN2/SKI/SALL1/MBD2/GPC5/PSME3/TNKS2/APP/BTRC/APC2/AMER1/TBL1XR1/ARNTL/FZD6/HIC1/ZNRF3/CUL3/CCNY/TCF7L2/UBE2B/NXN/TLE4/CAV1/PIN1/SMAD3/HMGXB4/FOLR1/CSNK1G3/ITGA3/KLHL12/PSMA2/CTDNEP1/STK4/WNT3A/FOXO3/PSMA7/DDX3X/SNAI2/PPP2CA/TBX18/KREMEN1/PSMF1/LIMD1/NOTCH1/MLLT3/NLK/ZNF703/LRP6/G3BP1/FOXO1/FGF9/RBPJ	64
BP	GO:0006914	autophagy	81/1785	496/18670	1.10251e-06	6.95163e-05	5.2945e-05	PIP4K2A/HMGB1/SNAPIN/SESN3/WAC/PAFAH1B2/PRKAB2/SNX5/GABARAPL1/MTMR3/ATG14/ACER2/PIM2/SYNPO2/STX17/YOD1/ABL2/MARK2/CAMKK2/ULK1/TMEM41B/TMBIM6/SMCR8/PRKAA2/RNF41/SREBF2/FZD5/SIRT1/TP53/FBXW7/UBQLN4/RALB/LIX1L/SPTLC2/KDR/EIF4G2/SMURF1/TRIM5/TRIB3/RAB1B/GATA4/PACS2/RAB3GAP2/RAB1A/UBQLN1/HSP90AA1/TBC1D25/TRIM65/MTDH/SCOC/ATP6V0B/UBXN2A/SESN2/ATG9A/FOXO3/VPS39/TBK1/NAMPT/HAX1/TP53INP1/SPATA18/VPS4A/WIP…	81
BP	GO:0061919	process utilizing autophagic mechanism	81/1785	496/18670	1.10251e-06	6.95163e-05	5.2945e-05	PIP4K2A/HMGB1/SNAPIN/SESN3/WAC/PAFAH1B2/PRKAB2/SNX5/GABARAPL1/MTMR3/ATG14/ACER2/PIM2/SYNPO2/STX17/YOD1/ABL2/MARK2/CAMKK2/ULK1/TMEM41B/TMBIM6/SMCR8/PRKAA2/RNF41/SREBF2/FZD5/SIRT1/TP53/FBXW7/UBQLN4/RALB/LIX1L/SPTLC2/KDR/EIF4G2/SMURF1/TRIM5/TRIB3/RAB1B/GATA4/PACS2/RAB3GAP2/RAB1A/UBQLN1/HSP90AA1/TBC1D25/TRIM65/MTDH/SCOC/ATP6V0B/UBXN2A/SESN2/ATG9A/FOXO3/VPS39/TBK1/NAMPT/HAX1/TP53INP1/SPATA18/VPS4A/WIP…	81
BP	GO:0036294	cellular response to decreased oxygen levels	44/1785	217/18670	1.21702e-06	7.5879e-05	5.7791e-05	PSMD3/KCNK3/MDM4/ZFP36L1/PTEN/PSME3/UBB/BACH1/GATA6/PHB2/EDN1/TMBIM6/ROCK2/SIRT1/TP53/NPEPPS/VEGFA/DNMT3A/CBL/PMAIP1/UBQLN1/PSMA2/PRKCE/RORA/CCNB1/FOXO3/PSMA7/NAMPT/PCK1/PRKAA1/MYC/HIF1A/CPEB1/MPL/PSMF1/LIMD1/CUL2/NOTCH1/SIRT4/HYOU1/NFE2L2/CPEB2/CITED2/RBPJ	44
BP	GO:0071902	positive regulation of protein serine/threonine kinase activity	60/1785	334/18670	1.22876e-06	7.5879e-05	5.7791e-05	PTK2B/DAZAP2/MAP4K3/MAP2K5/CAB39/TGFA/PARP16/TAOK1/TGFBR1/UBE2V1/HMGA2/UBB/SLC27A1/MAP3K9/CCNK/MAPK1/FGF2/CCND2/MAP3K3/EDN1/TRAF6/RHOA/ADAM9/PKD1/CCNT2/MAP2K1/FZD5/SIRT1/CCNY/EZH2/CCND1/EPHA4/ADORA2B/RALB/PAK3/FRS2/KRAS/VEGFA/MAP3K2/PDGFB/WNT7B/MAP3K1/CRKL/CCNB1/STK4/DDX3X/THBS1/CALM1/PPP2CA/FLT1/PRKAA1/RAPGEF2/ADAM17/F2R/CCNT1/GFRAL/ERBB2/MAPRE3/TAB2/TLR4	60
BP	GO:0045665	negative regulation of neuron differentiation	45/1785	225/18670	1.37353e-06	8.39538e-05	6.39409e-05	MYLIP/ASCL1/SNAPIN/PMP22/SIX3/NKX2-2/PTEN/RTN4R/ADCY6/EFNA1/YWHAH/RTN4RL1/APP/DCC/ARF6/GDI1/RHOA/SEMA6A/SEMA4C/CALR/EPHA4/CARM1/REST/PHOX2B/CTDSP1/ITM2C/MIB1/VIM/WNT3A/SLIT2/FOXO3/ID2/JAG1/FSTL4/RAPGEF2/KREMEN1/SEMA6D/LRIG2/NOTCH1/EPHB2/PAFAH1B1/ARHGDIA/SEMA7A/THRB/NGFR	45
BP	GO:0016579	protein deubiquitination	53/1785	283/18670	1.39641e-06	8.44897e-05	6.43491e-05	HCFC1/USP25/SKP2/OTUD5/PSMD3/CYLD/MDM4/ATXN7L3/OTUB1/PTEN/BAP1/TGFBR1/USP31/USP42/PSME3/UBB/RCE1/YOD1/USP38/ATXN7/KAT2B/CDC25A/USP14/TRAF6/RHOA/INO80D/TP53/USP37/RAD23B/ASXL1/USP32/CFTR/OGT/SMAD3/SMAD7/PSMA2/OTUD7B/USP15/TAF9B/PSMA7/SMAD1/YY1/SPATA2/MYC/HIF1A/TNIP2/FOXK1/PSMF1/USP3/CLSPN/SHMT2/FOXK2/ATXN3	53
BP	GO:0001838	embryonic epithelial tube formation	30/1785	124/18670	1.41513e-06	8.47663e-05	6.45597e-05	RARG/NPHP3/SIX4/ARID1A/PAX2/SKI/CC2D2A/TRIM71/HAND1/RARA/TRAF6/FZD6/APAF1/SEMA4C/MTHFR/FZD2/IRX2/DLC1/WNT4/PHACTR4/FOLR1/MIB1/STK4/MTHFD1L/SALL4/HIF1A/CASP3/VASP/LRP6/LUZP1	30
BP	GO:0016331	morphogenesis of embryonic epithelium	34/1785	150/18670	1.45208e-06	8.61183e-05	6.55894e-05	RARG/NPHP3/SIX4/ARID1A/PAX2/SKI/CC2D2A/TRIM71/HAND1/RARA/TRAF6/FZD6/APAF1/SEMA4C/MTHFR/RDH10/FZD2/IRX2/GLI2/DLC1/WNT7B/WNT4/PHACTR4/FOLR1/MIB1/STK4/MTHFD1L/SALL4/TBX18/HIF1A/CASP3/VASP/LRP6/LUZP1	34
BP	GO:1903362	regulation of cellular protein catabolic process	48/1785	247/18670	1.47003e-06	8.63282e-05	6.57493e-05	ARIH1/USP25/MYLIP/PTK2B/DDA1/FURIN/WAC/N4BP1/PTEN/SMARCC1/PSME3/TRIM67/UBB/SENP1/EFNA1/YOD1/SOCS5/AURKA/BTRC/EZR/TMTC3/AMER1/LAPTM4B/USP14/PKD1/FBXW7/EPHA4/RAD23B/UBQLN4/SMURF1/RDX/TRIB3/ARIH2/OGT/CAV1/HFE/UBQLN1/HSP90AA1/SMAD7/PBK/CBFA2T3/RNF14/TMF1/PSMF1/NFE2L2/MSN/FOXF2/ATXN3	48
BP	GO:0043488	regulation of mRNA stability	38/1785	177/18670	1.50133e-06	8.73104e-05	6.64973e-05	IGF2BP3/AXIN2/YWHAZ/TIRAP/PSMD3/KHSRP/PABPC1/ZFP36L1/ZFP36L2/YTHDF3/FXR1/PSME3/PUM2/UBB/TRIM71/SET/CPEB3/CNOT6L/HNRNPA0/TNPO1/ROCK2/PRKCD/SYNCRIP/FXR2/IGF2BP1/NPM1/SAMD4B/PSMA2/SERBP1/VIM/YBX1/PSMA7/HNRNPC/IGF2BP2/ANGEL2/PSMF1/HNRNPU/PUM1	38
BP	GO:0006888	endoplasmic reticulum to Golgi vesicle-mediated transport	43/1785	212/18670	1.58719e-06	9.07481e-05	6.91156e-05	SAR1B/COG6/SEC24A/TGFA/TMED5/TMED10/PDCD6/COG5/STX17/SPTBN2/CAPZA2/SAR1A/PPP6R1/SEC23IP/TMED7/PROS1/PPP6C/CUL3/TBC1D20/GOPC/WHAMM/KDELR1/RAB1B/ERGIC1/ANKRD28/RAB1A/FOLR1/NRBP1/KLHL12/TEX261/CAPZA1/TRAPPC2/ACTR1A/SEC23A/INSIG1/CAPZB/CREB3L2/GOSR1/ARF1/HYOU1/DYNC1LI2/SEC24C/ARFGAP2	43
BP	GO:0070646	protein modification by small protein removal	55/1785	299/18670	1.59074e-06	9.07481e-05	6.91156e-05	HCFC1/USP25/SKP2/OTUD5/PSMD3/CYLD/MDM4/ATXN7L3/OTUB1/PTEN/BAP1/TGFBR1/USP31/USP42/PSME3/UBB/SENP1/RCE1/YOD1/USP38/ATXN7/KAT2B/CDC25A/USP14/TRAF6/RHOA/INO80D/TP53/USP37/RAD23B/ASXL1/USP32/CFTR/OGT/SMAD3/SMAD7/PSMA2/OTUD7B/USP15/TAF9B/PSMA7/SMAD1/YY1/SPATA2/MYC/HIF1A/TNIP2/FOXK1/COPS7B/PSMF1/USP3/CLSPN/SHMT2/FOXK2/ATXN3	55
BP	GO:0090287	regulation of cellular response to growth factor stimulus	54/1785	292/18670	1.6663e-06	9.41616e-05	7.17154e-05	PPM1A/CCBE1/SLC9A6/ZBTB7A/PDPK1/RNF111/DSTYK/TGFBR3/ZEB1/SKI/RNF165/TGFBR1/PDCD6/UBB/GLG1/SPRY1/MTMR4/CASK/FGF2/ITGB3/BCL9L/CHRDL1/SEMA6A/SIRT1/TP53/HHIP/ONECUT2/SKIL/VEGFA/SMURF1/LOX/CAV1/WNT4/PIN1/SMAD3/GATA4/FOLR1/ITGA3/SMAD7/SLIT2/MYO1C/THBS1/FLT1/MYOCD/ADAM17/HIF1A/SPRY4/TGFBR2/NOTCH1/ZNF703/FGF9/CITED2/PEG10/RBPJ	54
BP	GO:0003205	cardiac chamber development	37/1785	171/18670	1.68473e-06	9.41645e-05	7.17176e-05	NPHP3/ARID1A/MDM4/TGFBR3/SALL1/TGFBR1/PCSK5/HAND1/GATA6/RARA/NOTCH2/RARB/PLXND1/SOS1/FGFRL1/TP53/FZD2/FRS2/UBE4B/FKBP1A/GATA4/SMAD7/ACVR1/RXRA/ZFPM2/SLIT2/ID2/JAG1/SALL4/MYOCD/MATR3/HIF1A/TGFBR2/NOTCH1/LUZP1/CITED2/RBPJ	37
BP	GO:0021955	central nervous system neuron axonogenesis	14/1785	35/18670	1.69779e-06	9.41645e-05	7.17176e-05	NDEL1/PTEN/NR4A2/DCC/EPHA4/GLI2/PHOX2B/HSP90AA1/SLIT2/NFIB/B4GALT5/EPHB2/PAFAH1B1/NIN	14
BP	GO:0071453	cellular response to oxygen levels	46/1785	234/18670	1.73631e-06	9.5336e-05	7.26098e-05	PSMD3/KCNK3/MDM4/ZFP36L1/PTEN/PSME3/UBB/BACH1/GATA6/PHB2/EDN1/TMBIM6/ROCK2/SIRT1/TP53/NPEPPS/VEGFA/CAV1/DNMT3A/CBL/PMAIP1/UBQLN1/PSMA2/PRKCE/RORA/CCNB1/FOXO3/PSMA7/NAMPT/PCK1/PRKAA1/MYC/HIF1A/CPEB1/MPL/PSMF1/LIMD1/CUL2/NOTCH1/SIRT4/HYOU1/NFE2L2/FOXO1/CPEB2/CITED2/RBPJ	46
BP	GO:0007389	pattern specification process	74/1785	446/18670	1.75074e-06	9.5336e-05	7.26098e-05	CYP26B1/HOXA3/AXIN2/RARG/NPHP3/ASCL1/SIX3/LEFTY1/PAX2/RNF111/NKX2-2/HOXA10/ZEB1/BCOR/HOXA9/SKI/PBX3/TGFBR1/RFX3/ACVR2A/SPRY1/PLXNA2/CC2D2A/PCSK5/HAND1/AURKA/HOXC8/NR2F2/BTG2/BASP1/APC2/EDN1/NEUROD1/RNF2/FZD5/TP53/HHIP/EMX2/IRX2/FRS2/GLI2/CHSY1/WNT7B/SMAD3/GATA4/KIF3B/EFNB1/FOLR1/CRKL/SIX2/OTX1/MIB1/ACVR1/WNT3A/HOXD13/MID1/HIPK1/SMAD1/MTF2/TBX18/YY1/RTTN/HOXC4/HIF1A/ATM/CELSR2/TGFBR2/NOTCH1/PSKH1/…	74
BP	GO:0001952	regulation of cell-matrix adhesion	29/1785	119/18670	1.79943e-06	9.71045e-05	7.39567e-05	MINK1/PTK2B/PIK3R1/CCR7/CDK6/PTEN/ACER2/LIMS1/CASK/CLASP1/ROCK2/RHOA/CORO1C/KDR/ONECUT2/VEGFA/DLC1/EPHA1/WNT4/SMAD3/PPM1F/THBS1/NF2/RCC2/CSF1/JAG1/CD3E/PTPRJ/UTRN	29
BP	GO:0072175	epithelial tube formation	31/1785	132/18670	1.87967e-06	0.000100529	7.65649e-05	RARG/NPHP3/SIX4/ARID1A/PAX2/SKI/CC2D2A/TRIM71/HAND1/RARA/TRAF6/FZD6/APAF1/SEMA4C/MTHFR/FZD2/IRX2/DLC1/WNT4/PHACTR4/FOLR1/PODXL/MIB1/STK4/MTHFD1L/SALL4/HIF1A/CASP3/VASP/LRP6/LUZP1	31
BP	GO:0030330	DNA damage response, signal transduction by p53 class mediator	27/1785	107/18670	1.97036e-06	0.000104447	7.95487e-05	MDM4/BCL3/ACER2/ZNF385A/CDKN1A/AURKA/CNOT6L/TFAP4/CASP2/BTG2/HIC1/SIRT1/TP53/TFDP2/CARM1/E2F7/PMAIP1/PPM1D/DDX5/CCNB1/SESN2/FOXO3/SPRED1/SNAI2/DYRK1A/PCNA/ATM	27
BP	GO:0048863	stem cell differentiation	49/1785	257/18670	2.03267e-06	0.000106804	8.13443e-05	ASCL1/SIX3/PSMD3/PAX2/CDK6/ZFP36L2/PDCD6/PSME3/HMGA2/KMT2A/MAPK1/GATA6/FN1/EDN1/SEMA6A/SETD1A/SEMA4C/TP53/CORO1C/RDH10/REST/PHOX2B/GATA4/JARID2/EFNB1/PHACTR4/FOLR1/KLHL12/PSMA2/ACVR1/NUDT21/WNT3A/PSMA7/SNAI2/JAG1/MTF2/MYOCD/HIF1A/FBXL17/SEMA6D/PSMF1/NOTCH1/PITX2/LRP6/NFE2L2/HNRNPU/PUM1/SEMA7A/RBPJ	49
BP	GO:0071456	cellular response to hypoxia	42/1785	207/18670	2.07007e-06	0.000107824	8.21206e-05	PSMD3/KCNK3/MDM4/ZFP36L1/PTEN/PSME3/UBB/BACH1/GATA6/PHB2/EDN1/TMBIM6/ROCK2/SIRT1/TP53/NPEPPS/VEGFA/DNMT3A/PMAIP1/UBQLN1/PSMA2/PRKCE/RORA/CCNB1/FOXO3/PSMA7/PCK1/PRKAA1/MYC/HIF1A/CPEB1/MPL/PSMF1/LIMD1/CUL2/NOTCH1/SIRT4/HYOU1/NFE2L2/CPEB2/CITED2/RBPJ	42
BP	GO:0032535	regulation of cellular component size	64/1785	370/18670	2.10186e-06	0.000108536	8.26628e-05	LRRC8A/PTK2B/RARG/CCR7/NDEL1/RAB22A/BDNF/PTEN/RTN4R/AP2M1/TWF1/ACTR2/ELN/DCC/SPTBN2/CAPZA2/VAV3/PEX11B/FN1/EZR/ARF6/EDN1/GDI1/RHOA/SEMA6A/PRKCD/RAB21/SEMA4C/SLC12A5/LIMA1/CREB1/BAG4/WHAMM/PAK3/GBA2/VEGFA/RDX/PLEKHG2/WNT7B/MAP1B/PRKCE/CAPZA1/ALOX15/AKT3/WNT3A/PICALM/SLIT2/MYO1C/MTPN/HAX1/RICTOR/CFL2/FSTL4/CAPZB/WASL/SEMA6D/ARF1/VASP/PAFAH1B1/MSN/SEMA7A/SPIRE1/F2RL1/WDTC1	64
BP	GO:0010508	positive regulation of autophagy	29/1785	120/18670	2.15877e-06	0.000110521	8.41754e-05	PIP4K2A/HMGB1/SESN3/WAC/PAFAH1B2/PIM2/CAMKK2/ULK1/SMCR8/PRKAA2/SIRT1/RALB/SPTLC2/KDR/SMURF1/RAB3GAP2/TRIM65/MTDH/SCOC/SESN2/FOXO3/TBK1/TP53INP1/PRKAA1/HIF1A/SH3GLB1/FYCO1/SPTLC1/FOXO1	29
BP	GO:0045446	endothelial cell differentiation	28/1785	114/18670	2.28359e-06	0.000115921	8.8288e-05	ZEB1/CLDN1/FOXJ2/NR2F2/EZR/ROCK2/RAP2C/KDR/VEGFA/RDX/TMEM100/WNT7B/ACVR1/PDPN/RAP1B/KDM6B/JAG1/MARVELD2/RAPGEF2/BTG1/NOTCH1/PDE4D/COL4A4/MSN/FASN/RBPJ/F2RL1/VEZF1	28
BP	GO:0019216	regulation of lipid metabolic process	69/1785	410/18670	2.33355e-06	0.000117462	8.94613e-05	KPNB1/SOCS1/PTK2B/PIK3R1/PDP2/CCR7/TNFRSF21/MID1IP1/SOCS7/PDPR/PRKAB2/ELOVL6/ACOX1/MTMR3/CPT1A/ATG14/NCOA2/SIK1/CYP4A11/SLC27A1/SOCS5/MTMR4/FGF2/SCD/VAV3/RBL1/TBL1XR1/SP1/PRKAA2/PRKCD/ORMDL2/SREBF2/IRS1/SIRT1/CREB1/FBXW7/CARM1/RDH10/REST/SF1/TRIB3/PDGFB/CAV1/WNT4/RB1/CHD9/SOCS6/DNAJC15/PDK4/IRS2/PRKCE/RORA/CTDNEP1/RXRA/SNAI2/INSIG1/ID2/FLT1/LPCAT1/PRKAA1/LYN/ARF1/SIRT4/BSCL2/FASN/WDR81/ATP1A1/BCL…	69
BP	GO:0035270	endocrine system development	30/1785	127/18670	2.40875e-06	0.000120237	9.15749e-05	HOXA3/ASCL1/SIX3/PDPK1/ETS1/CDK6/NKX2-2/SALL1/CLOCK/TGFBR1/RFX3/MAPK1/GATA6/ARNTL/NEUROD1/MAP2K1/CREB1/ONECUT2/BAK1/GLI2/WNT4/SMAD3/CRKL/RFX6/SIDT2/PITX2/FOXO1/CITED2/THRB/RBPJ	30
BP	GO:0000079	regulation of cyclin-dependent protein serine/threonine kinase activity	26/1785	102/18670	2.47238e-06	0.000122393	9.32171e-05	CCNF/LATS2/PTEN/CDKN1A/KAT2B/CCNK/CDC25A/CCND2/NR2F2/TFAP4/CCNE1/PKD1/CCNT2/CCNY/CCND1/PDGFB/IPO5/IPO7/CCNB1/GTF2H1/MYOCD/ADAM17/CCNT1/CCNJ/CASP3/MAPRE3	26
BP	GO:0010976	positive regulation of neuron projection development	52/1785	281/18670	2.52648e-06	0.000124046	9.44759e-05	PTK2B/NDEL1/BDNF/CAPRIN2/MAPK6/CPNE5/TRAK1/TRIM67/TWF1/PLXNA2/ABL2/MARK2/ACTR2/PLXNA1/UNC13A/CAPRIN1/CPEB3/FN1/PACSIN1/FBXW8/RNF157/GDI1/PLXND1/RHOA/SCARB2/FYN/MAP2K1/RAB21/EZH2/EPHA4/PAK3/SKIL/VEGFA/SMURF1/MAP1B/ITSN2/ITGA3/WNT3A/SLIT2/PTPRD/C21orf91/RAPGEF2/CREB3L2/LYN/ARF1/PAFAH1B1/NFE2L2/NIN/ARHGDIA/SEMA7A/CRTC1/NGFR	52
BP	GO:0010975	regulation of neuron projection development	80/1785	499/18670	2.6724e-06	0.000129094	9.83206e-05	MYLIP/PTK2B/SNAPIN/NDEL1/PMP22/BDNF/CAPRIN2/MAPK6/CPNE5/PTEN/TRAK1/RTN4R/ADCY6/TRIM67/TWF1/EFNA1/YWHAH/PLXNA2/ABL2/RTN4RL1/MARK2/ACTR2/PLXNA1/UNC13A/DCC/CAPRIN1/CPEB3/FN1/ARF6/PACSIN1/FBXW8/RNF157/GDI1/PLXND1/CAMSAP2/RHOA/SEMA6A/SCARB2/HECW2/FYN/MAP2K1/RAB21/SEMA4C/EZH2/EPHA4/CARM1/PAK3/SKIL/VEGFA/SMURF1/YTHDF1/MAP1B/ITSN2/ITGA3/CRKL/ITM2C/VIM/WNT3A/SLIT2/PTPRD/SNAP25/C21orf91/FSTL4/SIPA1L1/RAPGE…	80
BP	GO:0031667	response to nutrient levels	80/1785	499/18670	2.6724e-06	0.000129094	9.83206e-05	CYP26B1/GLUL/ASCL1/SESN3/HLCS/PAX2/GABARAPL1/PIM1/MTMR3/ATG14/PTEN/HSP90B1/SIK1/MBD2/CDKN1A/AHCY/JUN/MAPK1/ULK1/RARA/FNIP1/NNT/TBL1XR1/TMBIM6/PRKAA2/FYN/APAF1/SREBF2/SIRT1/TP53/TMEM135/CCND1/CREB1/MTHFR/MAX/RALB/SLC16A1/OGT/CHSY1/WNT4/MAP1B/DNMT3A/CBL/GATA4/SLC38A2/HFE/PMAIP1/ACSL4/FOLR1/PPM1D/ITGA2/DNAJC15/PDK4/KCNJ11/SESN2/ATG9A/ATP2B1/FOXO3/SLC2A1/SRSF2/SNAI2/NAMPT/ATF3/CD3E/WIPI2/TNRC6A/PCK1/…	80
BP	GO:0048568	embryonic organ development	71/1785	428/18670	2.8431e-06	0.000136241	0.000103764	HOXA3/FLVCR1/RARG/NPHP3/SIX4/ARID1A/SIX3/EPN1/PAX2/ZEB1/ZFP36L1/EN2/LRIG3/SALL1/MBD2/TGFBR1/KMT2A/EFNA1/CC2D2A/PCSK5/USH1G/HAND1/MAPK1/NR2F2/RARA/EDN1/RARB/FZD6/NEUROD1/PKD1/MAP2K1/FZD5/TP53/RDH10/RAD23B/FZD2/E2F7/FRS2/KDR/VEGFA/RBBP6/GLI2/PDGFB/WNT7B/SMAD3/GATA4/PHACTR4/FOLR1/SIX2/OTX1/MIB1/ACVR1/ZFPM2/STK4/WNT3A/HIPK1/INSIG1/ID2/MTHFD1L/HOXC4/HIF1A/TGFBR2/NOTCH1/LRP6/EPHB2/BCR/FOXF2/SLC39A1/FGF…	71
BP	GO:0045862	positive regulation of proteolysis	62/1785	358/18670	2.8963e-06	0.000137689	0.000104867	ARIH1/PTK2B/HMGB1/DDA1/FURIN/CCBE1/PTEN/TNFRSF10B/ACER2/HIP1/PDCD6/PSME3/TRIM67/SENP1/EFNA1/SOCS5/APP/AURKA/BTRC/TIMM17A/TFAP4/FN1/TMTC3/CLEC7A/ROCK2/RHOA/ADAM9/FYN/APAF1/SIRT1/FBXW7/EPHA4/PERP/GRIN2A/REST/BAK1/SMURF1/DLC1/TRIB3/ARIH2/OGT/CAV1/SMAD3/PMAIP1/UBQLN1/PPM1F/SMAD7/BCL2L13/WNT3A/PICALM/DDX3X/CBFA2T3/RNF14/MYC/F2R/LYN/SH3D19/NFE2L2/DAP/ANP32B/NGFR/ATXN3	62
BP	GO:2000027	regulation of animal organ morphogenesis	48/1785	253/18670	2.97063e-06	0.000140111	0.000106711	NPHP3/SIX4/PSMD3/PAX2/PIM1/BCOR/SRSF6/TGFBR1/ETV5/PSME3/AP2M1/SPRY1/PHB2/BASP1/EDN1/RHOA/FZD6/ZNRF3/FZD5/FBXW7/CARM1/FZD2/FRS2/VEGFA/SMURF1/WNT4/PSMA2/SIX2/ACVR1/RXRA/WNT3A/HOXD13/PSMA7/SNAI2/NFIB/CSF1/JAG1/CELSR3/VANGL1/MYC/CELSR2/PSMF1/TGFBR2/NOTCH1/MLLT3/CITED2/THRB/RBPJ	48
BP	GO:0001101	response to acid chemical	60/1785	343/18670	2.99743e-06	0.000140271	0.000106833	CYP26B1/SOCS1/PTK2B/RARG/CCR7/ASCL1/SESN3/HLCS/PAX2/TGFBR3/ZEB1/CPT1A/CLDN1/ACER2/ADCY6/IGF2R/ABL2/SMARCD1/CPEB3/SCD/PHB2/RARA/EDN1/RARB/TMBIM6/SLC1A2/RHOA/PRKAA2/FYN/IRS1/COL3A1/CREB1/MTHFR/ASXL1/KDR/VEGFA/PDGFB/IPO5/WNT7B/DNMT3A/FOLR1/ITGA2/PDK4/RXRB/PRKCE/RXRA/CCNB1/SESN2/WNT3A/CRLS1/YY1/PCK1/PRKAA1/CPEB1/PCNA/ATM/LYN/CASP3/SHMT2/FOXO1	60
BP	GO:0001889	liver development	31/1785	135/18670	3.11538e-06	0.00014466	0.000110176	NPHP3/DDX39B/TGFBR3/CLDN1/IGF2R/SEC63/JUN/AURKA/GATA6/RARA/ARF6/RARB/PKD1/CUL3/EZH2/CCND1/FBXW7/E2F7/ONECUT2/KRAS/WNT4/SMAD3/HFE/JARID2/ITGA2/WNT3A/PCK1/PCNA/NOTCH1/CEBPG/CITED2	31
BP	GO:0090068	positive regulation of cell cycle process	54/1785	298/18670	3.15115e-06	0.000145195	0.000110584	MECP2/MDM4/TGFA/RAB11FIP4/KMT2E/ESPL1/CEP120/ZNF385A/HMGA2/KIF23/CDKN1A/CDT1/APP/AURKA/CDC25A/CCND2/GATA6/CNOT6L/PHB2/CASP2/BTG2/EDN1/CCNE1/ROCK2/RHOA/LSM11/CUL3/TP53/EZH2/CCND1/TFDP2/CARM1/E2F7/UBE2B/UHRF2/RDX/PDGFB/IL1A/WNT4/RB1/PHOX2B/KIF3B/NPM1/PRKCE/CCNB1/BRD4/DDX3X/ID2/RCC2/PLRG1/ADAM17/PCNA/ATM/HNRNPU	54
BP	GO:0060317	cardiac epithelial to mesenchymal transition	13/1785	32/18670	3.24794e-06	0.000148513	0.00011311	HAS2/TGFBR3/TGFBR1/EFNA1/SPRY1/PDCD4/TMEM100/ACVR1/SNAI2/JAG1/TGFBR2/NOTCH1/RBPJ	13
BP	GO:0007569	cell aging	28/1785	116/18670	3.29409e-06	0.000149482	0.000113848	CDK6/BCL2L12/PTEN/LIMS1/HMGA2/CHEK1/CDKN1A/MAP3K3/MORC3/RBL1/PDCD4/MNT/ARNTL/HMGA1/RSL1D1/PRKCD/MAP2K1/CALR/SIRT1/TP53/PRELP/KRAS/NPM1/AKT3/ID2/NAMPT/PAWR/ATM	28
BP	GO:0007160	cell-matrix adhesion	44/1785	225/18670	3.33785e-06	0.000150329	0.000114494	MINK1/PTK2B/PIK3R1/CCR7/PDPK1/CDK6/PTEN/ACER2/LIMS1/ITGB1/CASK/ITGB3/FN1/CLASP1/ROCK2/RHOA/FERMT2/ADAM9/PKD1/COL3A1/CORO1C/WHAMM/PIP5K1A/KDR/ONECUT2/ADAMTS9/VEGFA/DLC1/EPHA1/WNT4/SMAD3/PPM1F/ITGA3/ITGA2/THBS1/NF2/RCC2/CSF1/JAG1/CD3E/PARVG/PTPRJ/BCR/UTRN	44
BP	GO:0032271	regulation of protein polymerization	43/1785	218/18670	3.4059e-06	0.000151121	0.000115097	CLIP1/PTK2B/MECP2/CCR7/TWF1/TUBB4A/ACTR2/ELN/SPTBN2/CAPZA2/SLAIN2/ARF6/CLASP1/CAMSAP2/RHOA/PRKCD/MAPRE1/BAG4/WHAMM/STMN1/PAK3/GBA2/RDX/PLEKHG2/MAP1B/HSP90AA1/PRKCE/CAPZA1/ALOX15/SLIT2/MYO1C/MTPN/HAX1/RICTOR/CAPZB/DYRK1A/WASL/CAMSAP1/ARF1/VASP/NIN/MAPRE3/SPIRE1	43
BP	GO:0032886	regulation of microtubule-based process	43/1785	218/18670	3.4059e-06	0.000151121	0.000115097	CLIP1/MECP2/MID1IP1/CCNF/CYLD/RAB6C/TAOK1/CEP120/CHEK1/TUBB4A/TMEM67/MARK2/KAT2B/AURKA/SMC1A/SLAIN2/APC2/CLASP1/MAPRE2/CAMSAP2/ROCK2/RHOA/PRKAA2/PKD1/MAPRE1/STMN1/GBA2/BICD2/MAP1B/NPM1/WNT3A/MID1/CCSAP/PRKAA1/CDK2AP2/DYRK1A/CAMSAP1/ERBB2/PAFAH1B1/NIN/MAPRE3/HNRNPU/CCDC65	43
BP	GO:0043487	regulation of RNA stability	38/1785	183/18670	3.50472e-06	0.000154362	0.000117566	IGF2BP3/AXIN2/YWHAZ/TIRAP/PSMD3/KHSRP/PABPC1/ZFP36L1/ZFP36L2/YTHDF3/FXR1/PSME3/PUM2/UBB/TRIM71/SET/CPEB3/CNOT6L/HNRNPA0/TNPO1/ROCK2/PRKCD/SYNCRIP/FXR2/IGF2BP1/NPM1/SAMD4B/PSMA2/SERBP1/VIM/YBX1/PSMA7/HNRNPC/IGF2BP2/ANGEL2/PSMF1/HNRNPU/PUM1	38
BP	GO:0048199	vesicle targeting, to, from or within Golgi	21/1785	74/18670	3.60764e-06	0.000157735	0.000120135	SAR1B/SEC24A/TGFA/TMED10/PDCD6/SAR1A/PPP6R1/SEC23IP/PPP6C/CUL3/TBC1D20/RAB1B/ANKRD28/RAB1A/FOLR1/KLHL12/TRAPPC2/SEC23A/GOSR1/SEC24C/ARFGAP2	21
BP	GO:0048738	cardiac muscle tissue development	45/1785	233/18670	3.67111e-06	0.000159348	0.000121362	ARID1A/DDX39B/TGFBR3/PIM1/PTEN/TTN/SIK1/TGFBR1/ITGB1/HAND1/MAPK1/FGF2/GATA6/RARA/EDN1/RARB/CALR/CREB1/FRS2/ADAMTS9/VEGFA/UBE4B/PIN1/FKBP1A/GATA4/JARID2/SMAD7/ACVR1/RXRA/ZFPM2/CCNB1/WNT3A/SMAD1/KDM6B/ID2/PRKAR1A/YY1/DSG2/MYOCD/SGCD/TGFBR2/NOTCH1/HNRNPU/FGF9/RBPJ	45
BP	GO:0043087	regulation of GTPase activity	77/1785	479/18670	3.70054e-06	0.00015947	0.000121455	PTK2B/CCR7/NDEL1/TAX1BP3/ARHGAP21/EPHA5/TBC1D2/LLGL1/GNB5/SIPA1L2/CDC42SE1/RTN4R/LIMS1/ALS2CL/CCL22/SPRY1/PLXNA2/ITGB1/AMOT/PLXNA1/JUN/VAV3/APC2/AGFG1/GDI1/NUP50/MAPRE2/PLXND1/SOS1/EZH2/TBC1D20/TBC1D13/CORO1C/EPHA4/ACAP2/SNX18/PIP5K1A/ARHGAP1/RDX/CHML/DLC1/EPHA1/IPO5/WNT4/PIN1/BNIP2/RAB3GAP2/RAB11FIP2/TBC1D25/CRKL/ARHGAP32/RANBP2/EVI5/ARHGAP15/PICALM/SLIT2/SEC23A/PROM2/ARHGAP42/RCC2/RAP1GDS1/RICT…	77
BP	GO:0045927	positive regulation of growth	50/1785	270/18670	3.83069e-06	0.000163899	0.000124829	PTK2B/DDX39B/NDEL1/TGFBR3/BDNF/MAP2K5/PIM1/CPNE5/RPS6KA3/SH3PXD2B/CACNA2D2/SERP1/TGFBR1/UNC13A/MAPK1/FGF2/GATA6/BASP1/FN1/EZR/RNF157/EDN1/GDI1/RHOA/TFCP2L1/CREB1/EIF4G2/VEGFA/SMURF1/PIN1/MAP1B/ITSN2/PPM1F/TAF9B/ZFPM2/CCNB1/WNT3A/MTPN/EXTL3/DDX3X/CSF1/ADAM17/TGFBR2/NOTCH1/ERBB2/PAFAH1B1/FXN/FGF9/SEMA7A/RBPJ	50
BP	GO:1901653	cellular response to peptide	65/1785	385/18670	4.07192e-06	0.000172985	0.000131749	SOCS1/PIK3R1/SESN3/NDEL1/IGF1R/PDPK1/CYP11A1/ZFP36L1/PTEN/ADCY6/NR4A2/SMARCC1/RAB10/KAT2B/APP/MYO5A/NUCKS1/OSBPL8/RAB13/EDN1/SP1/ROCK2/SOS1/FYN/PRKCD/IRS1/PRKAR2A/SIRT1/TP53/CREB1/EPHA4/MAX/ATP1A3/TRIB3/OGT/CAV1/MAP1B/KLF3/PDK4/IRS2/ZNF106/ATP6V0B/VIM/ATP2B1/MYO1C/FOXO3/RAP1B/ADCY9/NAMPT/PRKAR1A/PCK1/PRKAA1/KLF10/CPEB1/ANXA5/LYN/APPL1/LEPROT/NFE2L2/FOXO1/CPEB2/GPR173/NGFR/TLR4/WDTC1	65
BP	GO:0010769	regulation of cell morphogenesis involved in differentiation	54/1785	301/18670	4.29026e-06	0.000180343	0.000137353	NDEL1/HAS2/BDNF/CAPRIN2/PTEN/TRAK1/RTN4R/LIMS1/UNC13D/EFNA1/YWHAH/PLXNA2/MARK2/ACTR2/PLXNA1/DCC/CAPRIN1/RREB1/FN1/FBXW8/GDI1/PLXND1/RHOA/SEMA6A/HECW2/MAP2K1/RAB21/SEMA4C/CALR/CORO1C/EPHA4/PAK3/SKIL/VEGFA/YTHDF1/MAP1B/CRKL/WNT3A/SLIT2/PDPN/RCC2/PTPRD/FSTL4/SIPA1L1/RAPGEF2/MPL/SEMA6D/EPHB2/PAFAH1B1/NIN/ARHGDIA/SRCIN1/SEMA7A/NGFR	54
BP	GO:0060828	regulation of canonical Wnt signaling pathway	52/1785	286/18670	4.30708e-06	0.000180343	0.000137353	PPM1A/AXIN2/NPHP3/GSKIP/RECK/CTNND1/LATS2/PSMD3/CYLD/CSNK1G2/CAPRIN2/GPC5/PSME3/TNKS2/BTRC/APC2/AMER1/TBL1XR1/ARNTL/FZD6/ZNRF3/CUL3/CCNY/TCF7L2/UBE2B/TLE4/CAV1/PIN1/SMAD3/FOLR1/CSNK1G3/KLHL12/PSMA2/CTDNEP1/STK4/WNT3A/FOXO3/PSMA7/DDX3X/SNAI2/TBX18/KREMEN1/PSMF1/LIMD1/NOTCH1/MLLT3/ZNF703/LRP6/G3BP1/FOXO1/FGF9/RBPJ	52
BP	GO:0021537	telencephalon development	47/1785	249/18670	4.33546e-06	0.000180343	0.000137353	ASCL1/NDEL1/SIX3/EPHA5/CDK6/KIF5B/PTEN/SKI/SALL1/SUN2/RTN4R/CEP120/RTN4RL1/YWHAE/RARA/EZH1/BTG2/RARB/SLC1A2/PEX13/RHOA/NEUROD1/COL3A1/EZH2/PHLPP2/EMX2/BTBD3/IGF2BP1/SLC38A2/EXT1/CRKL/WNT3A/SLIT2/SLC2A1/KDM6B/NFIB/SLC7A11/ID2/NF2/HIF1A/CASP3/LRP6/EPHB2/PAFAH1B1/NIN/SEMA7A/BCL11B	47
BP	GO:1903829	positive regulation of cellular protein localization	57/1785	324/18670	4.38907e-06	0.000181244	0.000138039	PPM1A/PIK3R1/SAR1B/YWHAZ/PDPK1/CYLD/KIF5B/BAP1/YWHAH/ITGB1/CDT1/MAPK1/YWHAQ/YWHAE/SAR1A/EZR/ARF6/ROCK2/PRKAA2/FYN/PRKCD/TMEM30B/SREBF2/FZD5/TP53/FBXW7/TFDP2/NPEPPS/TCF7L2/CD2AP/RDX/ARIH2/IPO5/SMAD3/CENPQ/PMAIP1/RER1/ITGA3/RAB11FIP2/WNK3/CARD10/PRKCE/KCNJ11/SESN2/WNT3A/MYO1C/PRKAA1/SQSTM1/SH3GLB1/LRIG2/ERBB2/EPHB2/LEPROT/MAPK8/MSN/ANP32B/NGFR	57
BP	GO:0001841	neural tube formation	26/1785	105/18670	4.41764e-06	0.000181244	0.000138039	RARG/NPHP3/ARID1A/PAX2/SKI/CC2D2A/TRIM71/RARA/TRAF6/FZD6/APAF1/SEMA4C/MTHFR/FZD2/DLC1/PHACTR4/FOLR1/MIB1/STK4/MTHFD1L/SALL4/HIF1A/CASP3/VASP/LRP6/LUZP1	26
BP	GO:0010634	positive regulation of epithelial cell migration	36/1785	171/18670	4.50914e-06	0.00018374	0.00013994	PTK2B/HMGB1/CCBE1/PDPK1/HAS2/ETS1/PDCD6/JUN/FGF2/RREB1/MAP3K3/ITGB3/ARF6/EDN1/SP1/CLASP1/MAPRE2/AMOTL1/ROCK2/ADAM9/CALR/SIRT1/KDR/VEGFA/PDGFB/PPM1F/ITGA3/RHOB/ITGA2/PRKCE/AKT3/THBS1/ADAM17/HIF1A/TGFBR2/NFE2L2	36
BP	GO:1902275	regulation of chromatin organization	38/1785	185/18670	4.59605e-06	0.000186016	0.000141674	MECP2/SETD5/BCOR/OTUB1/MLLT6/KMT2E/SKI/NSD1/RPS6KA5/CHEK1/KMT2A/SET/SPTY2D1/KDM5A/HMGA1/SETD1A/SIRT1/TP53/MTHFR/UBE2B/VEGFA/OGT/PHF19/JARID2/PHF8/CCNB1/MKI67/TLK1/BRD4/SNAI2/ATAD2/MTF2/MYOCD/MIER1/ATM/PYGO2/MAPK8/HNRNPU	38
BP	GO:0045666	positive regulation of neuron differentiation	63/1785	371/18670	4.69938e-06	0.000186097	0.000141735	PTK2B/ASCL1/NDEL1/NKX2-2/BDNF/ZEB1/CAPRIN2/MAPK6/CPNE5/PTEN/TRAK1/ETV5/TRIM67/TWF1/PLXNA2/ABL2/MARK2/ACTR2/PLXNA1/UNC13A/CAPRIN1/CPEB3/RARA/FN1/PACSIN1/FBXW8/RNF157/RARB/GDI1/PLXND1/RHOA/NEUROD1/SCARB2/FYN/MAP2K1/RAB21/EZH2/EPHA4/PAK3/REST/SKIL/VEGFA/SMURF1/GLI2/MAP1B/PHOX2B/ITSN2/ITGA3/WNT3A/SLIT2/PTPRD/C21orf91/RAPGEF2/CREB3L2/LYN/ARF1/PAFAH1B1/NFE2L2/NIN/ARHGDIA/SEMA7A/CRTC1/NGFR	63
BP	GO:0030512	negative regulation of transforming growth factor beta receptor signaling pathway	22/1785	81/18670	4.72175e-06	0.000186097	0.000141735	PPM1A/ZBTB7A/PDPK1/TGFBR3/SKI/TGFBR1/UBB/GLG1/MTMR4/BCL9L/SIRT1/TP53/ONECUT2/SKIL/SMURF1/CAV1/PIN1/SMAD3/SMAD7/ADAM17/TGFBR2/PEG10	22
BP	GO:0048041	focal adhesion assembly	22/1785	81/18670	4.72175e-06	0.000186097	0.000141735	PTK2B/PDPK1/PTEN/LIMS1/CLASP1/ROCK2/RHOA/FERMT2/CORO1C/WHAMM/PIP5K1A/KDR/VEGFA/DLC1/WNT4/SMAD3/PPM1F/ITGA2/THBS1/RCC2/PTPRJ/BCR	22
BP	GO:0032092	positive regulation of protein binding	24/1785	93/18670	4.72232e-06	0.000186097	0.000141735	HOXA3/TIRAP/BDNF/CAPRIN2/FLOT1/APP/ARF6/PLXND1/PKD1/EPHA4/MAPRE1/RALB/TCF7L2/TRIB3/CAV1/PIN1/FKBP1A/PPP2CB/HFE/STK4/WNT3A/PPP2CA/RAPGEF2/MAPRE3	24
BP	GO:0016236	macroautophagy	53/1785	295/18670	5.02171e-06	0.000195572	0.000148952	PIP4K2A/SNAPIN/SESN3/WAC/PAFAH1B2/PRKAB2/SNX5/GABARAPL1/MTMR3/ATG14/PIM2/SYNPO2/STX17/YOD1/ULK1/TMEM41B/SMCR8/PRKAA2/RNF41/SIRT1/TP53/UBQLN4/RALB/LIX1L/SPTLC2/KDR/SMURF1/RAB1B/PACS2/RAB3GAP2/RAB1A/UBQLN1/TBC1D25/SCOC/ATP6V0B/UBXN2A/SESN2/ATG9A/TBK1/TP53INP1/VPS4A/WIPI2/PRKAA1/VPS33A/HIF1A/VAMP8/SQSTM1/SH3GLB1/FYCO1/CASP3/MAPK8/SPTLC1/WDR81	53
BP	GO:0002065	columnar/cuboidal epithelial cell differentiation	27/1785	112/18670	5.02806e-06	0.000195572	0.000148952	LRTOMT/RARG/ASCL1/PDPK1/CDK6/NKX2-2/CLOCK/RFX3/CDKN1A/GATA6/RARA/RARB/ARNTL/NEUROD1/TMEM231/WNT4/GATA4/YIPF6/RXRA/RFX6/SIDT2/JAG1/HIF1A/DLX3/NOTCH1/PAFAH1B1/RBPJ	27
BP	GO:0061008	hepaticobiliary system development	31/1785	138/18670	5.06332e-06	0.000195673	0.000149028	NPHP3/DDX39B/TGFBR3/CLDN1/IGF2R/SEC63/JUN/AURKA/GATA6/RARA/ARF6/RARB/PKD1/CUL3/EZH2/CCND1/FBXW7/E2F7/ONECUT2/KRAS/WNT4/SMAD3/HFE/JARID2/ITGA2/WNT3A/PCK1/PCNA/NOTCH1/CEBPG/CITED2	31
BP	GO:2000134	negative regulation of G1/S transition of mitotic cell cycle	29/1785	125/18670	5.16358e-06	0.000198268	0.000151005	CDK6/WEE1/MDM4/PTEN/SLFN11/ZNF385A/CDKN1A/NACC2/AURKA/CNOT6L/CASP2/BTG2/RBL1/DCUN1D3/TP53/EZH2/CCND1/TFDP2/CARM1/E2F7/RB1/CTDSP1/RFWD3/CCNB1/CDK2AP2/CTDSP2/PCNA/ATM/CTDSPL	29
BP	GO:1904029	regulation of cyclin-dependent protein kinase activity	26/1785	106/18670	5.3272e-06	0.000203248	0.000154798	CCNF/LATS2/PTEN/CDKN1A/KAT2B/CCNK/CDC25A/CCND2/NR2F2/TFAP4/CCNE1/PKD1/CCNT2/CCNY/CCND1/PDGFB/IPO5/IPO7/CCNB1/GTF2H1/MYOCD/ADAM17/CCNT1/CCNJ/CASP3/MAPRE3	26
BP	GO:0006901	vesicle coating	20/1785	70/18670	5.45826e-06	0.00020693	0.000157602	SAR1B/SEC24A/TGFA/TMED10/PDCD6/SAR1A/PPP6R1/SEC23IP/PPP6C/CUL3/TBC1D20/RAB1B/ANKRD28/RAB1A/FOLR1/KLHL12/TRAPPC2/SEC23A/SEC24C/ARFGAP2	20
BP	GO:0016202	regulation of striated muscle tissue development	33/1785	152/18670	5.56916e-06	0.000208689	0.000158942	CYP26B1/SIX4/DDX39B/TGFBR3/PIM1/PTEN/FLOT1/TGFBR1/MAPK1/FGF2/GATA6/EDN1/ARNTL/NLN/CREB1/FRS2/LOX/PIN1/SMAD3/JARID2/DDX5/AKIRIN1/ZFPM2/CCNB1/WNT3A/MTPN/YY1/MYOCD/PRKAA1/TGFBR2/NOTCH1/FGF9/RBPJ	33
BP	GO:0003158	endothelium development	30/1785	132/18670	5.57433e-06	0.000208689	0.000158942	ZEB1/CLDN1/FOXJ2/NR2F2/EZR/ROCK2/RHOA/RAP2C/KDR/VEGFA/RDX/TMEM100/WNT7B/RHOB/ACVR1/PDPN/RAP1B/KDM6B/JAG1/MARVELD2/RAPGEF2/BTG1/NOTCH1/PDE4D/COL4A4/MSN/FASN/RBPJ/F2RL1/VEZF1	30
BP	GO:1990778	protein localization to cell periphery	56/1785	319/18670	5.67287e-06	0.000211059	0.000160747	CLIP1/PIK3R1/PDPK1/KIF5B/FLOT1/ATP1B3/CLSTN1/NFASC/AP2M1/ITGB1/RAB10/MYO5A/MPP5/KIF13A/EZR/RAB13/ARF6/PACSIN1/GGA2/ROCK2/LIN7C/GOLGA7/GOPC/BAG4/PIP5K1A/GRIN2A/SMURF1/RDX/CAV1/PACS2/RER1/ITGA3/RAB11FIP2/WNK3/PRKCE/KCNJ11/WNT3A/PICALM/SEC23A/FAM126A/SCN3B/SNAP25/VPS4A/PDZD11/RAPGEF2/DPP6/CPLX1/VAMP8/CACNG8/SQSTM1/IQSEC2/APPL1/RAB15/LRP6/EPHB2/STXBP1	56
BP	GO:0060411	cardiac septum morphogenesis	21/1785	76/18670	5.74256e-06	0.000212333	0.000161717	TGFBR3/TGFBR1/HAND1/GATA6/RARA/NOTCH2/RARB/FGFRL1/TP53/FZD2/GATA4/SMAD7/ACVR1/ZFPM2/SLIT2/ID2/JAG1/TGFBR2/NOTCH1/CITED2/RBPJ	21
BP	GO:0031669	cellular response to nutrient levels	45/1785	237/18670	5.85536e-06	0.000215175	0.000163882	GLUL/SESN3/GABARAPL1/PIM1/MTMR3/ATG14/HSP90B1/SIK1/CDKN1A/JUN/MAPK1/ULK1/FNIP1/PRKAA2/FYN/SREBF2/SIRT1/TP53/MAX/RALB/WNT4/CBL/SLC38A2/HFE/PMAIP1/FOLR1/PPM1D/DNAJC15/PDK4/SESN2/ATP2B1/SLC2A1/SNAI2/NAMPT/ATF3/WIPI2/TNRC6A/PCK1/PRKAA1/KLF10/SH3GLB1/MAPK8/NFE2L2/FOXO1/DAP	45
BP	GO:0043254	regulation of protein-containing complex assembly	70/1785	429/18670	6.00389e-06	0.000219289	0.000167015	HCFC1/PPM1A/CLIP1/PTK2B/HMGB1/MECP2/SAR1B/CCR7/RIOK3/TWF1/TUBB4A/CDT1/ACTR2/ELN/RHOC/SPTBN2/ULK1/CAPZA2/SAR1A/FNIP1/SLAIN2/ARF6/CLEC7A/CLASP1/CAMSAP2/RHOA/PRKCD/TP53/CREB1/MAPRE1/BAG4/WHAMM/RALB/STMN1/PAK3/GBA2/VEGFA/RDX/PLEKHG2/MAP1B/RB1/PMAIP1/HSP90AA1/DNAJC15/PRKCE/CAPZA1/ALOX15/SLIT2/MYO1C/MTPN/GTF2H1/DDX3X/HAX1/DHX33/RICTOR/CAPZB/DYRK1A/WASL/ATM/SH3GLB1/CAMSAP1/ARF1/GTF2H3/VASP/MSN/NIN/MAPRE…	70
BP	GO:0006470	protein dephosphorylation	56/1785	321/18670	6.87964e-06	0.000249752	0.000190216	PPP1R1A/PPM1A/PDP2/PALD1/ARPP19/PPP1R3B/MTMR3/PTEN/PTPN14/PTPN12/HSP90B1/DUSP2/PTP4A1/SHOC2/PPP1R11/PPP1R15B/SET/DUSP4/MTMR4/PPM1L/CDC25A/BTRC/YWHAE/PPP6R1/PPTC7/PPP1R9B/ROCK2/DUSP14/PRKCD/CRY2/PPP6C/PTPRM/PPP1R12A/PHLPP2/DLC1/PIN1/FKBP1A/PPP2CB/CTDSP1/PHACTR4/PPM1D/PPM1F/PPM1H/CTDNEP1/PPM1K/CALM1/PPP2CA/PTPRD/PPP2R5E/CTDSP2/PTBP1/CTDSPL/PTPDC1/LHPP/PTPRJ/PPP2R2A	56
BP	GO:0010632	regulation of epithelial cell migration	52/1785	291/18670	7.20285e-06	0.00025991	0.000197953	GLUL/PTK2B/HMGB1/MECP2/CCBE1/PDPK1/HAS2/ETS1/MAP2K5/PTEN/PDCD6/EFNA1/JUN/FGF2/RREB1/NR2F2/MAP3K3/ITGB3/ARF6/EDN1/SP1/CLASP1/MAPRE2/AMOTL1/ROCK2/RHOA/ADAM9/PTPRM/CALR/SIRT1/FBXW7/CORO1C/KDR/ADAMTS9/VEGFA/PDGFB/PPM1F/ITGA3/RHOB/ITGA2/CARD10/PRKCE/AKT3/SLIT2/SPRED1/THBS1/ADAM17/HIF1A/TGFBR2/NOTCH1/NFE2L2/SYNJ2BP	52
BP	GO:1903845	negative regulation of cellular response to transforming growth factor beta stimulus	22/1785	83/18670	7.28057e-06	0.000261141	0.00019889	PPM1A/ZBTB7A/PDPK1/TGFBR3/SKI/TGFBR1/UBB/GLG1/MTMR4/BCL9L/SIRT1/TP53/ONECUT2/SKIL/SMURF1/CAV1/PIN1/SMAD3/SMAD7/ADAM17/TGFBR2/PEG10	22
BP	GO:0007163	establishment or maintenance of cell polarity	41/1785	210/18670	7.40769e-06	0.00026412	0.000201159	CYP26B1/PTK2B/CCR7/NDEL1/WEE1/LLGL1/AMOTL2/CLIC4/SPRY1/MARK2/ACTR2/AMOT/RAB10/RHOC/RND3/MPP5/ARF6/RHOBTB3/CLASP1/AMOTL1/ROCK2/RHOA/PKD1/LIN7C/RNF41/WNT7B/MAP1B/HSP90AA1/RAB11FIP2/RHOB/CRKL/ACTR1A/RAP1B/RICTOR/PARVG/PDZD11/DOCK7/PAFAH1B1/MSN/SYNJ2BP/PARD6B	41
BP	GO:0051169	nuclear transport	59/1785	346/18670	8.17236e-06	0.000289089	0.000220176	KPNA2/KPNB1/RRS1/PPM1A/PIK3R1/DDX39B/SIX3/PTPN14/KPNA1/SRSF6/SNRPB/SMG1/ATXN1/CDKN1A/TNPO2/MAPK1/PHB2/YWHAE/NPAP1/RANBP6/AGFG1/KPNA6/RNPS1/PABPN1/ARNTL/NUP50/HMGA1/STRADB/TNPO1/BACH2/SNRPD1/NEUROD1/PKD1/PRKCD/FAM53C/CALR/TP53/PPP1R12A/NUP153/TCF7L2/TXNIP/SMURF1/YTHDC1/IPO5/SMAD3/IPO7/NPM1/SIX2/RANBP2/PHAX/NXT2/SRSF2/APPL1/SNRPD3/NUP98/SMG7/ANP32B/FGF9/NUP210	59
BP	GO:0048207	vesicle targeting, rough ER to cis-Golgi	19/1785	66/18670	8.25279e-06	0.000289089	0.000220176	SAR1B/SEC24A/TGFA/TMED10/PDCD6/SAR1A/PPP6R1/SEC23IP/PPP6C/CUL3/TBC1D20/RAB1B/ANKRD28/RAB1A/FOLR1/KLHL12/TRAPPC2/SEC23A/SEC24C	19
BP	GO:0048208	COPII vesicle coating	19/1785	66/18670	8.25279e-06	0.000289089	0.000220176	SAR1B/SEC24A/TGFA/TMED10/PDCD6/SAR1A/PPP6R1/SEC23IP/PPP6C/CUL3/TBC1D20/RAB1B/ANKRD28/RAB1A/FOLR1/KLHL12/TRAPPC2/SEC23A/SEC24C	19
BP	GO:1901861	regulation of muscle tissue development	33/1785	155/18670	8.64081e-06	0.000300921	0.000229188	CYP26B1/SIX4/DDX39B/TGFBR3/PIM1/PTEN/FLOT1/TGFBR1/MAPK1/FGF2/GATA6/EDN1/ARNTL/NLN/CREB1/FRS2/LOX/PIN1/SMAD3/JARID2/DDX5/AKIRIN1/ZFPM2/CCNB1/WNT3A/MTPN/YY1/MYOCD/PRKAA1/TGFBR2/NOTCH1/FGF9/RBPJ	33
BP	GO:0090114	COPII-coated vesicle budding	20/1785	72/18670	8.73037e-06	0.000302283	0.000230225	SAR1B/SEC24A/TGFA/TMED10/PDCD6/SAR1A/PPP6R1/SEC23IP/PPP6C/CUL3/TBC1D20/RAB1B/ANKRD28/RAB1A/FOLR1/KLHL12/TRAPPC2/SEC23A/INSIG1/SEC24C	20
BP	GO:0050769	positive regulation of neurogenesis	75/1785	474/18670	8.79253e-06	0.000302685	0.000230531	PTK2B/ASCL1/NDEL1/NKX2-2/BDNF/ZEB1/CAPRIN2/MAPK6/NAP1L1/CPNE5/PTEN/TRAK1/ETV5/TRIM67/TWF1/PLXNA2/ABL2/MARK2/ACTR2/PLXNA1/UNC13A/CAPRIN1/CPEB3/RARA/DICER1/FN1/PACSIN1/FBXW8/RNF157/RARB/GDI1/PLAG1/PLXND1/RHOA/NEUROD1/SEMA6A/SCARB2/FYN/MAP2K1/RAB21/EZH2/EPHA4/PAK3/REST/SKIL/VEGFA/SMURF1/GLI2/MAP1B/ZNF609/PHOX2B/ITSN2/ITGA3/CRKL/CCR2/WNT3A/SLIT2/ID2/CSF1/PTPRD/C21orf91/RAPGEF2/CREB3L2/HIF1A/LYN/NOTCH…	75
BP	GO:0021954	central nervous system neuron development	21/1785	78/18670	8.96273e-06	0.000306353	0.000233325	ASCL1/NDEL1/PTEN/GABRB1/NR4A2/UBB/DCC/BTG2/EPHA4/GBA2/GLI2/PHOX2B/HSP90AA1/CRKL/SLIT2/NFIB/RAPGEF2/B4GALT5/EPHB2/PAFAH1B1/NIN	21
BP	GO:0050673	epithelial cell proliferation	70/1785	434/18670	9.00136e-06	0.000306353	0.000233325	GLUL/HMGB1/SIX4/PDPK1/B4GALT1/HAS2/PAX2/CDK6/TGFBR3/MAP2K5/NRAS/ZFP36L1/TGFA/PTEN/SRSF6/TGFBR1/PDCD6/ACVR2A/HMGB2/LAMC1/JUN/MAPK1/CASK/BTRC/FGF2/RREB1/RUNX3/NR2F2/PHB2/ITGB3/NOTCH2/SP1/MAP2K1/PTPRM/SIRT1/CCND1/FBXW7/TCF7L2/FRS2/BTBD10/KDR/VEGFA/PDGFB/CAV1/RB1/SMAD3/PURA/MTSS1/AKT3/WNT3A/SNAI2/NFIB/SIDT2/THBS1/AIMP1/ID2/FLT1/RICTOR/LOXL2/ADAM17/MYC/HIF1A/NOTCH1/PYGO2/ERBB2/ZNF703/FGF9/SYNJ2BP/BCL1…	70
BP	GO:0009952	anterior/posterior pattern specification	42/1785	219/18670	9.15349e-06	0.000309771	0.000235928	HOXA3/AXIN2/RARG/SIX3/HOXA10/HOXA9/SKI/PBX3/TGFBR1/ACVR2A/PLXNA2/PCSK5/AURKA/HOXC8/NR2F2/BTG2/BASP1/NEUROD1/RNF2/FZD5/TP53/EMX2/FRS2/GLI2/SMAD3/GATA4/CRKL/SIX2/OTX1/MIB1/WNT3A/HOXD13/HIPK1/TBX18/YY1/HOXC4/ATM/CELSR2/NOTCH1/MLLT3/LRP6/RBPJ	42
BP	GO:0048634	regulation of muscle organ development	33/1785	156/18670	9.96862e-06	0.000335461	0.000255494	CYP26B1/SIX4/DDX39B/TGFBR3/PIM1/PTEN/FLOT1/TGFBR1/MAPK1/FGF2/GATA6/EDN1/ARNTL/NLN/CREB1/FRS2/LOX/PIN1/SMAD3/JARID2/DDX5/AKIRIN1/ZFPM2/CCNB1/WNT3A/MTPN/YY1/MYOCD/PRKAA1/TGFBR2/NOTCH1/FGF9/RBPJ	33
BP	GO:0014020	primary neural tube formation	24/1785	97/18670	1.0325e-05	0.000345513	0.00026315	RARG/NPHP3/ARID1A/PAX2/SKI/CC2D2A/TRIM71/RARA/TRAF6/FZD6/APAF1/SEMA4C/MTHFR/FZD2/DLC1/PHACTR4/FOLR1/MTHFD1L/SALL4/HIF1A/CASP3/VASP/LRP6/LUZP1	24
BP	GO:0032970	regulation of actin filament-based process	64/1785	388/18670	1.04312e-05	0.000347126	0.000264378	PTK2B/PIK3R1/CCR7/CACNA1C/EPHA5/SH3PXD2B/ATP2A2/TAOK1/TGFBR1/SYNPO2/TWF1/ABL2/ACTR2/ELN/RHOC/SPTBN2/RND3/CAPZA2/NOTCH2/ARF6/RHOBTB3/EDN1/CLASP1/ROCK2/RHOA/PRKCD/LIMA1/BAG4/WHAMM/STMN1/PAK3/GBA2/CD2AP/RDX/PLEKHG2/DLC1/EPHA1/CAV1/WNT4/SMAD3/GATA4/PPM1F/RHOB/PRKCE/CAPZA1/ALOX15/SLIT2/PDPN/MYO1C/MTPN/HAX1/NF2/RICTOR/CFL2/DSG2/CAPZB/WASL/ARF1/PDE4D/VASP/ARHGDIA/SPIRE1/ATP1A1/F2RL1	64
BP	GO:0001701	in utero embryonic development	62/1785	373/18670	1.11607e-05	0.00036935	0.000281305	HCFC1/FLVCR1/NDEL1/EPN1/ZFP36L1/BCOR/GABPA/TGFBR1/ITGB1/AMOT/HAND1/MAPK1/GATA6/NR2F2/TAF8/TBL1XR1/EDN1/TRAF6/SSR2/PKD1/MAP2K1/CUL3/FZD5/TP53/MBNL1/RDH10/E2F7/SH3PXD2A/UBE2B/NXN/SKIL/UBR3/VEGFA/RBBP6/TMEM231/GLI2/TMEM100/PDGFB/TM4SF1/WNT7B/SMAD3/OTUD7B/MIB1/ACVR1/RXRA/ZFPM2/CCNB1/STK4/WNT3A/UNK/ADCY9/HM13/SALL4/HIF1A/NCAPG2/UBE2A/TGFBR2/NOTCH1/PYGO2/SLC39A1/RBPJ/WDTC1	62
BP	GO:0045216	cell-cell junction organization	37/1785	185/18670	1.15358e-05	0.000378393	0.000288192	CTNND1/CLDN1/GJB1/NFASC/TGFBR1/LIMS1/RHOC/MPP5/CADM2/RAB13/ARF6/PKP1/RASSF8/MAPRE2/ROCK2/RHOA/FZD5/PERP/VEGFA/RDX/CAV1/SMAD3/OCLN/SMAD7/MTDH/CDH12/MYO1C/HIPK1/SNAI2/NF2/DSG2/MARVELD2/F2R/ZNF703/NLGN2/F2RL1/PARD6B	37
BP	GO:0061448	connective tissue development	49/1785	273/18670	1.15603e-05	0.000378393	0.000288192	HOXA3/AXIN2/RARG/ZEB1/SH3PXD2B/TGFBR1/ARRDC3/HMGA2/UBB/EVC/GLG1/BMP3/HAND1/FGF2/RUNX3/RARA/AMER1/TBL1XR1/MEF2D/EDN1/RARB/IMPAD1/PKD1/SIRT1/CARM1/SPTLC2/GLI2/LOX/PDGFB/CHSY1/WNT7B/SMAD3/TRPS1/SIX2/SMAD1/SNAI2/NFIB/ID2/CSF1/COCH/LOXL2/HOXC4/CREB3L2/HIF1A/TGFBR2/NOTCH1/SLC25A25/LRP6/FGF9	49
BP	GO:2001233	regulation of apoptotic signaling pathway	66/1785	406/18670	1.24194e-05	0.000404306	0.000307928	YWHAZ/CYLD/BDNF/MAP2K5/BCL2L12/PELI3/PTEN/TNFRSF10B/UNC5B/TGFBR1/PLAGL2/ZMYND11/NR4A2/ZNF385A/PSME3/UBB/YWHAH/HMGB2/NONO/NACC2/YWHAQ/YWHAE/TFAP4/CASP2/DNAJA1/MNT/TMBIM6/STRADB/FYN/APAF1/SLC35F6/PRKCD/SIRT1/TP53/FBXW7/TFDP2/MAZ/TCF7L2/SKIL/BAK1/CAV1/IL1A/WNT4/RB1/SMAD3/GATA4/PMAIP1/PAK2/UBQLN1/ITM2C/ACVR1/TAF9B/STK4/DDX3X/SNAI2/THBS1/ATF3/HIF1A/TIMP3/GFRAL/HYOU1/MAPK8/NFE2L2/FXN/TRAF1/ITPRIP	66
BP	GO:0006913	nucleocytoplasmic transport	58/1785	343/18670	1.25824e-05	0.000407398	0.000310283	KPNA2/KPNB1/RRS1/PPM1A/PIK3R1/DDX39B/SIX3/PTPN14/KPNA1/SRSF6/SNRPB/SMG1/ATXN1/CDKN1A/TNPO2/MAPK1/PHB2/YWHAE/NPAP1/RANBP6/AGFG1/KPNA6/RNPS1/PABPN1/ARNTL/NUP50/STRADB/TNPO1/BACH2/SNRPD1/NEUROD1/PKD1/PRKCD/FAM53C/CALR/TP53/PPP1R12A/NUP153/TCF7L2/TXNIP/SMURF1/YTHDC1/IPO5/SMAD3/IPO7/NPM1/SIX2/RANBP2/PHAX/NXT2/SRSF2/APPL1/SNRPD3/NUP98/SMG7/ANP32B/FGF9/NUP210	58
BP	GO:0010506	regulation of autophagy	56/1785	328/18670	1.32412e-05	0.000424796	0.000323533	PIP4K2A/HMGB1/SESN3/WAC/PAFAH1B2/PRKAB2/SNX5/MTMR3/ACER2/PIM2/ABL2/CAMKK2/ULK1/SMCR8/PRKAA2/RNF41/SREBF2/FZD5/SIRT1/TP53/FBXW7/UBQLN4/RALB/SPTLC2/KDR/EIF4G2/SMURF1/TRIB3/RAB1B/GATA4/RAB3GAP2/UBQLN1/TBC1D25/TRIM65/MTDH/SCOC/ATP6V0B/SESN2/FOXO3/TBK1/NAMPT/HAX1/TP53INP1/PRKAA1/HIF1A/FOXK1/ATM/SH3GLB1/FYCO1/CASP3/MAPK8/SPTLC1/FOXO1/TAB2/DAP/FOXK2	56
BP	GO:0035914	skeletal muscle cell differentiation	19/1785	68/18670	1.32717e-05	0.000424796	0.000323533	CYP26B1/FOXN2/SIX4/BCL9/BCL9L/BTG2/MEF2D/ARNTL/NLN/FOS/HIVEP3/RB1/PHOX2B/DDX5/AKIRIN1/WNT3A/ATF3/MYOCD/NOTCH1	19
BP	GO:0031346	positive regulation of cell projection organization	63/1785	383/18670	1.33325e-05	0.000424796	0.000323533	PTK2B/CCR7/NDEL1/CEP135/BDNF/CAPRIN2/MAPK6/CPNE5/TRAK1/TGFBR1/CEP120/TRIM67/TWF1/PLXNA2/ABL2/MARK2/ACTR2/PLXNA1/UNC13A/CAPRIN1/CPEB3/RREB1/FN1/PACSIN1/FBXW8/RNF157/GDI1/PLXND1/RHOA/SCARB2/FYN/MAP2K1/RAB21/EZH2/CORO1C/EPHA4/PAK3/SKIL/VEGFA/SMURF1/MAP1B/ITSN2/ITGA3/ITGA2/AKIRIN1/WNT3A/SLIT2/PROM2/PTPRD/C21orf91/RAPGEF2/CREB3L2/WASL/LYN/ARF1/PAFAH1B1/NFE2L2/NIN/ARHGDIA/SEMA7A/CRTC1/NGFR/F2RL1	63
BP	GO:0010810	regulation of cell-substrate adhesion	41/1785	215/18670	1.34078e-05	0.000424935	0.000323639	MINK1/PTK2B/PIK3R1/CCR7/HAS2/CDK6/PTEN/ACER2/LIMS1/UNC13D/CASK/RREB1/FN1/CLASP1/ROCK2/RHOA/CALR/CORO1C/KDR/ONECUT2/VEGFA/DLC1/EPHA1/WNT4/SMAD3/PPM1F/ITGA3/CRKL/PRKCE/ALOX15/PDPN/THBS1/NF2/RCC2/CSF1/JAG1/CD3E/PTPRJ/NOTCH1/UTRN/ATXN3	41
BP	GO:0072331	signal transduction by p53 class mediator	48/1785	267/18670	1.35314e-05	0.000426505	0.000324835	RRS1/CHD4/TP53RK/PRKAB2/MDM4/BCL2L12/BCL3/ACER2/ZNF385A/UBB/CHEK1/CDKN1A/AURKA/CNOT6L/TFAP4/CASP2/BTG2/RFC5/DDIT4/PRKAA2/HIC1/SIRT1/TP53/TMEM109/TFDP2/CARM1/DNA2/E2F7/PERP/PIN1/PMAIP1/PPM1D/DDX5/TAF9B/CCNB1/SESN2/SUPT16H/FOXO3/SPRED1/HIPK1/SNAI2/E2F2/TP53INP1/RAD50/PRKAA1/DYRK1A/PCNA/ATM	48
BP	GO:1902807	negative regulation of cell cycle G1/S phase transition	29/1785	131/18670	1.35997e-05	0.000426505	0.000324835	CDK6/WEE1/MDM4/PTEN/SLFN11/ZNF385A/CDKN1A/NACC2/AURKA/CNOT6L/CASP2/BTG2/RBL1/DCUN1D3/TP53/EZH2/CCND1/TFDP2/CARM1/E2F7/RB1/CTDSP1/RFWD3/CCNB1/CDK2AP2/CTDSP2/PCNA/ATM/CTDSPL	29
BP	GO:0048194	Golgi vesicle budding	21/1785	80/18670	1.37321e-05	0.000428414	0.000326289	SAR1B/SEC24A/TGFA/TMED10/PDCD6/SAR1A/PPP6R1/SEC23IP/PPP6C/CUL3/TBC1D20/RAB1B/ANKRD28/RAB1A/FOLR1/KLHL12/TRAPPC2/SEC23A/INSIG1/SEC24C/ARFGAP2	21
BP	GO:0010631	epithelial cell migration	59/1785	352/18670	1.39627e-05	0.00043335	0.000330048	GLUL/PTK2B/HMGB1/MECP2/CCBE1/PDPK1/HAS2/ETS1/MAP2K5/PTEN/TGFBR1/PDCD6/EFNA1/ITGB1/AMOT/JUN/FGF2/RREB1/NR2F2/MAP3K3/ITGB3/RAB13/ARF6/EDN1/SP1/CLASP1/MAPRE2/PLXND1/AMOTL1/ROCK2/RHOA/ADAM9/PTPRM/CALR/SIRT1/FBXW7/CORO1C/KDR/ADAMTS9/VEGFA/PDGFB/PPM1F/ITGA3/RHOB/ITGA2/CARD10/PRKCE/AKT3/SLIT2/SPRED1/THBS1/LOXL2/ADAM17/HIF1A/TGFBR2/NOTCH1/NFE2L2/EPHB4/SYNJ2BP	59
BP	GO:0071375	cellular response to peptide hormone stimulus	55/1785	321/18670	1.41882e-05	0.000438078	0.000333649	SOCS1/PIK3R1/SESN3/NDEL1/IGF1R/PDPK1/CYP11A1/ZFP36L1/PTEN/ADCY6/NR4A2/SMARCC1/RAB10/KAT2B/MYO5A/NUCKS1/OSBPL8/RAB13/EDN1/SP1/ROCK2/SOS1/FYN/PRKCD/IRS1/PRKAR2A/SIRT1/CREB1/MAX/TRIB3/OGT/CAV1/MAP1B/PDK4/IRS2/ZNF106/ATP6V0B/ATP2B1/MYO1C/FOXO3/RAP1B/ADCY9/PRKAR1A/PCK1/PRKAA1/CPEB1/ANXA5/LYN/APPL1/LEPROT/NFE2L2/FOXO1/CPEB2/GPR173/WDTC1	55
BP	GO:0045137	development of primary sexual characteristics	42/1785	223/18670	1.45044e-05	0.000443673	0.00033791	SIX4/FNDC3A/TFAP2C/HOXA10/HOXA9/SALL1/TGFBR1/ACVR2A/UBB/AGO4/HMGB2/KDM5A/CBX2/GATA6/RARA/ARID4B/CASP2/BASP1/RAB13/RHOBTB3/SIRT1/TBC1D20/CCND1/RDH10/VEGFA/SF1/WNT4/CBL/GATA4/CRKL/ZFPM2/SLIT2/PLEKHA1/FOXO3/TIPARP/DACH1/CSDE1/ATM/TMF1/CASP3/FGF9/CITED2	42
BP	GO:0006417	regulation of translation	68/1785	424/18670	1.45551e-05	0.000443673	0.00033791	AGO1/IGF2BP3/PTK2B/MKNK2/DDX39B/ZNF706/KHSRP/PABPC1/CAPRIN2/ZFP36L1/DPH2/ZFP36L2/BCL3/YTHDF3/RPS6KA3/FXR1/CELF1/SERP1/ZNF385A/PUM2/SECISBP2L/AGO4/PPP1R15B/TRIM71/APP/CAPRIN1/MAPK1/CPEB3/CNOT6L/RARA/BTG2/ROCK2/RHOA/LSM14A/CALR/MRPS27/SYNCRIP/CNBP/PA2G4/FXR2/EIF4G2/YTHDF1/IGF2BP1/PURA/NPM1/SAMD4B/ITGA2/EIF5A2/RXRA/VIM/SESN2/ENC1/UNK/FOXO3/MTPN/DDX3X/IGF2BP2/THBS1/TARBP2/TNRC6A/CPEB1/ERBB2/SHMT2/KLH…	68
BP	GO:0007015	actin filament organization	65/1785	400/18670	1.45916e-05	0.000443673	0.00033791	PTK2B/PIK3R1/CCR7/TPM3/ACTA1/SH3PXD2B/HSP90B1/TTN/HIP1/TGFBR1/SYNPO2/TWF1/ACTR2/ELN/RHOC/SPTBN2/RND3/CAPZA2/EZR/ARF6/PACSIN1/RHOBTB3/CLASP1/PPP1R9B/ROCK2/RHOA/MARCKS/PRKCD/CUL3/LIMA1/CORO1C/BAG4/WHAMM/STMN1/PAK3/WASF3/GBA2/CD2AP/RDX/PLEKHG2/DLC1/EPHA1/WNT4/SMAD3/TNFAIP1/PPM1F/RHOB/PRKCE/CAPZA1/ALOX15/SLIT2/MYO1C/MTPN/HAX1/NF2/RICTOR/CFL2/PAWR/CAPZB/WASL/ARF1/ARHGAP12/VASP/SPIRE1/F2RL1	65
BP	GO:1905475	regulation of protein localization to membrane	37/1785	187/18670	1.48479e-05	0.000447613	0.000340911	PIK3R1/YWHAZ/PDPK1/KIF5B/GPC5/AP2M1/YWHAH/ITGB1/YWHAQ/YWHAE/EZR/ARF6/GDI1/FYN/TP53/TFDP2/GOPC/PMAIP1/RER1/ITGA3/RAB11FIP2/CRKL/WNK3/PRKCE/KCNJ11/WNT3A/PICALM/MYO1C/SLC7A11/VPS4A/VAMP8/SQSTM1/IQSEC2/APPL1/ERBB2/EPHB2/MAPK8	37
BP	GO:0061028	establishment of endothelial barrier	14/1785	41/18670	1.48706e-05	0.000447613	0.000340911	CLDN1/EZR/ROCK2/RAP2C/VEGFA/RDX/WNT7B/RAP1B/MARVELD2/RAPGEF2/PDE4D/MSN/FASN/F2RL1	14
BP	GO:0034250	positive regulation of cellular amide metabolic process	32/1785	152/18670	1.49656e-05	0.00044822	0.000341373	PTK2B/DDX39B/PABPC1/BCL3/YTHDF3/FXR1/SERP1/EFNA1/APP/MAPK1/CPEB3/ROCK2/RHOA/PRKCD/MRPS27/EPHA4/CNBP/FXR2/YTHDF1/NPM1/ITGA2/EIF5A2/RXRA/VIM/PICALM/DDX3X/THBS1/TARBP2/CASP3/ERBB2/NFE2L2/HABP4	32
BP	GO:0030705	cytoskeleton-dependent intracellular transport	36/1785	180/18670	1.50589e-05	0.000448772	0.000341794	CLUAP1/SNAPIN/NDEL1/ARHGAP21/KIF5B/SSX2IP/TRAK1/SUN2/KIF23/UBB/CCDC88C/APP/MYO5A/KIF13A/KIF5A/MYO10/TNPO1/RAB21/AP3D1/KIF5C/BICD2/MAP1B/PURA/KIF3B/RAB1A/ARL8B/ACTR1A/MYO1C/ARL8A/TTC26/HIF1A/WASL/FYCO1/KIF3A/PAFAH1B1/HNRNPU	36
BP	GO:0090130	tissue migration	60/1785	361/18670	1.5412e-05	0.000457018	0.000348074	GLUL/PTK2B/HMGB1/MECP2/CCBE1/PDPK1/HAS2/ETS1/ACTA1/MAP2K5/PTEN/TGFBR1/PDCD6/EFNA1/ITGB1/AMOT/JUN/FGF2/RREB1/NR2F2/MAP3K3/ITGB3/RAB13/ARF6/EDN1/SP1/CLASP1/MAPRE2/PLXND1/AMOTL1/ROCK2/RHOA/ADAM9/PTPRM/CALR/SIRT1/FBXW7/CORO1C/KDR/ADAMTS9/VEGFA/PDGFB/PPM1F/ITGA3/RHOB/ITGA2/CARD10/PRKCE/AKT3/SLIT2/SPRED1/THBS1/LOXL2/ADAM17/HIF1A/TGFBR2/NOTCH1/NFE2L2/EPHB4/SYNJ2BP	60
BP	GO:0071229	cellular response to acid chemical	40/1785	209/18670	1.55599e-05	0.000459131	0.000349683	CYP26B1/SOCS1/PTK2B/RARG/SESN3/PAX2/ZEB1/CPT1A/CLDN1/ADCY6/ABL2/SMARCD1/CPEB3/PHB2/RARA/EDN1/RARB/PRKAA2/FYN/IRS1/COL3A1/CREB1/KDR/VEGFA/PDGFB/IPO5/WNT7B/DNMT3A/FOLR1/PDK4/PRKCE/CCNB1/SESN2/WNT3A/PCK1/PRKAA1/CPEB1/ATM/LYN/SHMT2	40
BP	GO:0006903	vesicle targeting	23/1785	93/18670	1.57973e-05	0.00046234	0.000352127	SAR1B/SEC24A/TGFA/TMED10/PDCD6/SAR1A/STARD3/PPP6R1/SEC23IP/CLASP1/PPP6C/CUL3/TBC1D20/RAB1B/ANKRD28/RAB1A/FOLR1/KLHL12/TRAPPC2/SEC23A/GOSR1/SEC24C/ARFGAP2	23
BP	GO:0034329	cell junction assembly	66/1785	409/18670	1.5823e-05	0.00046234	0.000352127	PTK2B/MECP2/SIX4/PDPK1/CTNND1/BDNF/PTEN/FLOT1/CLDN1/CLSTN1/GJB1/NFASC/LIMS1/APP/SLITRK4/RHOC/SPTBN2/LAMC1/MPP5/FN1/RAB13/ARF6/PKP1/CLASP1/PLXND1/ROCK2/RHOA/FERMT2/FZD5/CORO1C/WHAMM/PIP5K1A/KDR/VEGFA/DLC1/CAV1/WNT4/MAP1B/SMAD3/OCLN/PPM1F/SMAD7/ITGA2/CRKL/MTDH/CAPZA1/CDH12/WNT3A/MYO1C/RAP1B/HIPK1/SNAI2/CD151/THBS1/RCC2/PTPRD/MARVELD2/PLEC/RAPGEF2/PTPRJ/ZNF703/VASP/EPHB2/NLGN2/BCR/PARD6B	66
BP	GO:0097191	extrinsic apoptotic signaling pathway	42/1785	224/18670	1.62312e-05	0.000471966	0.000359459	PIK3R1/MKNK2/PDPK1/CYLD/MAP2K5/PELI3/PTEN/TNFRSF10B/UNC5B/TGFBR1/ZMYND11/PSME3/HMGB2/DCC/CASP2/STRADB/FYN/RNF41/TCF7L2/SKIL/BAK1/CAV1/IL1A/SMAD3/PMAIP1/PAK2/ITM2C/ACVR1/STK4/FOXO3/HIPK1/DDX3X/SNAI2/THBS1/ATF3/APPL1/TIMP3/GFRAL/CASP3/SIVA1/TRAF1/ITPRIP	42
BP	GO:0031589	cell-substrate adhesion	59/1785	354/18670	1.6616e-05	0.00047955	0.000365235	MINK1/PTK2B/PIK3R1/CCR7/PDPK1/HAS2/CDK6/PTEN/ACER2/LIMS1/AKIP1/UNC13D/EFNA1/ITGB1/LAMC1/CASK/RREB1/ITGB3/FN1/CLASP1/ROCK2/RHOA/FERMT2/ADAM9/PKD1/CALR/COL3A1/CORO1C/WHAMM/PIP5K1A/KDR/ONECUT2/ADAMTS9/VEGFA/DLC1/EPHA1/WNT4/SMAD3/RAB1A/PPM1F/ITGA3/ITGA2/CRKL/PRKCE/ALOX15/PDPN/THBS1/NF2/RCC2/CSF1/JAG1/CD3E/PARVG/PTPRJ/NOTCH1/BCR/UTRN/SRCIN1/ATXN3	59
BP	GO:0031098	stress-activated protein kinase signaling cascade	54/1785	315/18670	1.66617e-05	0.00047955	0.000365235	MINK1/PTK2B/HMGB1/CCR7/IGF1R/TIRAP/MAP4K3/CYLD/MAP2K5/ZFP36L1/TAOK1/ZMYND11/UBE2V1/UBB/CCDC88C/MAP3K9/APP/MAPK1/BTRC/MAP3K3/EZR/DNAJA1/PDCD4/EDN1/TRAF6/STRADB/RHOA/MAP2K1/SEMA4C/FZD5/EPHA4/ADORA2B/PAK3/VEGFA/MAP3K2/WNT7B/MAP3K1/PAK2/CRKL/IRAK4/STK4/MID1/PBK/ZNF622/MYC/TNIP2/LYN/GFRAL/PAFAH1B1/MAPK8/FOXO1/TAB2/F2RL1/TLR4	54
BP	GO:0099518	vesicle cytoskeletal trafficking	16/1785	52/18670	1.67542e-05	0.00047955	0.000365235	SNAPIN/NDEL1/KIF5B/TRAK1/KIF23/MYO5A/KIF13A/KIF5A/AP3D1/KIF3B/RAB1A/MYO1C/WASL/FYCO1/KIF3A/PAFAH1B1	16
BP	GO:0006367	transcription initiation from RNA polymerase II promoter	37/1785	188/18670	1.68123e-05	0.00047955	0.000365235	NR6A1/HMGB1/RARG/MECP2/NR2C2/PTEN/POLR2F/NR4A2/CDKN1A/KAT2B/RARA/NOTCH2/RARB/GTF2E2/NR3C1/E2F3/TP53/CCND1/CREB1/MAZ/PPM1D/NRBP1/RXRB/MED17/RORA/TAF9B/RXRA/CCNB1/GTF2H1/E2F2/MAML3/NOTCH1/GTF2H3/MED8/CDK8/THRB/RBPJ	37
BP	GO:0003281	ventricular septum development	20/1785	75/18670	1.69885e-05	0.000482281	0.000367315	MDM4/TGFBR3/SALL1/TGFBR1/FGFRL1/FZD2/FRS2/GATA4/SMAD7/ACVR1/ZFPM2/SLIT2/ID2/SALL4/MATR3/TGFBR2/NOTCH1/LUZP1/CITED2/RBPJ	20
BP	GO:0021915	neural tube development	33/1785	160/18670	1.73664e-05	0.000490682	0.000373713	RARG/NPHP3/ARID1A/PAX2/ZFP36L1/SKI/PLXNA2/CC2D2A/TRIM71/RARA/TRAF6/FZD6/PKD1/APAF1/SEMA4C/MTHFR/FZD2/GLI2/DLC1/SALL2/PHACTR4/FOLR1/MIB1/STK4/WNT3A/MTHFD1L/SALL4/HIF1A/CASP3/NOTCH1/VASP/LRP6/LUZP1	33
BP	GO:0090132	epithelium migration	59/1785	355/18670	1.8111e-05	0.000509318	0.000387907	GLUL/PTK2B/HMGB1/MECP2/CCBE1/PDPK1/HAS2/ETS1/MAP2K5/PTEN/TGFBR1/PDCD6/EFNA1/ITGB1/AMOT/JUN/FGF2/RREB1/NR2F2/MAP3K3/ITGB3/RAB13/ARF6/EDN1/SP1/CLASP1/MAPRE2/PLXND1/AMOTL1/ROCK2/RHOA/ADAM9/PTPRM/CALR/SIRT1/FBXW7/CORO1C/KDR/ADAMTS9/VEGFA/PDGFB/PPM1F/ITGA3/RHOB/ITGA2/CARD10/PRKCE/AKT3/SLIT2/SPRED1/THBS1/LOXL2/ADAM17/HIF1A/TGFBR2/NOTCH1/NFE2L2/EPHB4/SYNJ2BP	59
BP	GO:0046620	regulation of organ growth	26/1785	113/18670	1.82199e-05	0.000509987	0.000388416	FLVCR1/DDX39B/LATS2/TGFBR3/PIM1/PTEN/CACNA2D2/SERP1/TGFBR1/MAPK1/FGF2/GATA6/BASP1/EDN1/CARM1/PIN1/JARID2/ZFPM2/CCNB1/STK4/YY1/TGFBR2/NOTCH1/FXN/FGF9/RBPJ	26
BP	GO:0051236	establishment of RNA localization	38/1785	196/18670	1.85614e-05	0.000517129	0.000393856	IGF2BP3/RRS1/DDX39B/KHSRP/ZFP36L1/FLOT1/RBFOX1/SRSF6/SMG1/AGFG1/RNPS1/PABPN1/NUP50/G3BP2/HNRNPA3/KIF5C/NUP153/YTHDC1/BICD2/IGF2BP1/PURA/NPM1/RANBP2/PHAX/EIF5A2/NXT2/MYO1C/AHCTF1/SRSF2/SIDT2/IGF2BP2/ATM/TGFBR2/NUP98/HNRNPU/SMG7/NUP210/PARP11	38
BP	GO:1903749	positive regulation of establishment of protein localization to mitochondrion	17/1785	58/18670	1.88166e-05	0.000521813	0.000397423	YWHAZ/BAP1/YWHAH/YWHAQ/YWHAE/SREBF2/FZD5/TP53/FBXW7/TFDP2/NPEPPS/ARIH2/PMAIP1/PRKAA1/SH3GLB1/LEPROT/MAPK8	17
BP	GO:0043401	steroid hormone mediated signaling pathway	36/1785	182/18670	1.93837e-05	0.000535061	0.000407513	NR6A1/RARG/ARID1A/ZBTB7A/SKP2/KMT2D/NR2C2/UFM1/CLOCK/CREBRF/NR4A2/YWHAH/NR2F2/PHB2/RARA/DNAJA1/RARB/ARNTL/CCNE1/RHOA/NCOA3/CRY2/NR3C1/CALR/SIRT1/CARM1/KCTD6/RB1/PAQR7/DDX5/RXRB/RBFOX2/RORA/RXRA/RNF14/THRB	36
BP	GO:1901991	negative regulation of mitotic cell cycle phase transition	45/1785	248/18670	1.95382e-05	0.000536851	0.000408877	PSMD3/CDK6/WEE1/MDM4/ZFP36L1/ZFP36L2/PTEN/TAOK1/SLFN11/ZNF385A/PSME3/HMGA2/CDKN1A/CDT1/NACC2/AURKA/CNOT6L/CASP2/BTG2/RBL1/ZNF207/DCUN1D3/TP53/EZH2/CCND1/TFDP2/CARM1/E2F7/RB1/CTDSP1/PSMA2/FBXL7/RFWD3/FOXN3/CCNB1/PSMA7/VPS4A/CDK2AP2/CTDSP2/BUB3/PCNA/ATM/CTDSPL/PSMF1/CLSPN	45
BP	GO:0015931	nucleobase-containing compound transport	44/1785	241/18670	2.05584e-05	0.000559748	0.000426316	IGF2BP3/RRS1/DDX39B/SLC25A24/KHSRP/ZFP36L1/FLOT1/RBFOX1/SRSF6/SLC35C2/GJB1/SMG1/SLC25A36/AGFG1/RNPS1/PABPN1/NUP50/G3BP2/HNRNPA3/KIF5C/NUP153/YTHDC1/BICD2/IGF2BP1/PURA/NPM1/SLC35E3/RANBP2/PHAX/EIF5A2/SLC25A32/NXT2/MYO1C/AHCTF1/SRSF2/SIDT2/IGF2BP2/TGFBR2/SLC25A25/NUP98/HNRNPU/SMG7/NUP210/PARP11	44
BP	GO:0090092	regulation of transmembrane receptor protein serine/threonine kinase signaling pathway	44/1785	241/18670	2.05584e-05	0.000559748	0.000426316	PPM1A/ZBTB7A/PDPK1/LEFTY1/RNF111/LEFTY2/TGFBR3/ZEB1/SKI/RNF165/TGFBR1/ACVR2A/UBB/GLG1/BMP3/MTMR4/BCL9L/CHRDL1/SIRT1/TP53/ONECUT2/SKIL/SMURF1/LOX/CAV1/PIN1/SMAD3/FKBP1A/GATA4/HFE/FOLR1/ITGA3/SMAD7/ACVR1/THBS1/MYOCD/ADAM17/TGFBR2/NOTCH1/ZNF703/FGF9/CITED2/PEG10/RBPJ	44
BP	GO:0031076	embryonic camera-type eye development	13/1785	37/18670	2.11017e-05	0.000571941	0.000435602	RARG/ARID1A/SIX3/PAX2/ZEB1/RARA/FZD5/RDH10/FRS2/PHACTR4/HIPK1/LRP6/FOXF2	13
BP	GO:0006352	DNA-templated transcription, initiation	45/1785	249/18670	2.16815e-05	0.000585011	0.000445556	NR6A1/HMGB1/RARG/MECP2/TFAM/MITF/NR2C2/PTEN/CD3EAP/POLR2F/NR4A2/CDKN1A/KAT2B/JUN/RARA/NOTCH2/RARB/GTF2E2/UBTF/NR3C1/E2F3/TP53/CCND1/CREB1/BAZ2A/MAZ/TBPL1/PPM1D/NRBP1/SMARCA5/RXRB/MED17/RORA/TAF9B/RXRA/CCNB1/GTF2H1/E2F2/MAML3/NOTCH1/GTF2H3/MED8/CDK8/THRB/RBPJ	45
BP	GO:0050768	negative regulation of neurogenesis	51/1785	295/18670	2.2388e-05	0.000601365	0.000458012	MYLIP/ASCL1/SNAPIN/PMP22/SIX3/IDH2/NKX2-2/PTEN/SKI/RTN4R/ADCY6/EFNA1/YWHAH/RTN4RL1/APP/DCC/DICER1/ARF6/GDI1/RHOA/SEMA6A/SEMA4C/CALR/TP53/COL3A1/EPHA4/CARM1/REST/PHOX2B/CTDSP1/ITM2C/MIB1/VIM/WNT3A/SLIT2/FOXO3/ID2/JAG1/FSTL4/RAPGEF2/KREMEN1/SEMA6D/LRIG2/NOTCH1/EPHB2/PAFAH1B1/ARHGDIA/SEMA7A/THRB/GPR173/NGFR	51
BP	GO:0071156	regulation of cell cycle arrest	25/1785	108/18670	2.3489e-05	0.000626621	0.000477247	MDM4/ZNF385A/HMGA2/CDKN1A/CCNK/AURKA/GATA6/CNOT6L/TFAP4/CASP2/BTG2/NEUROD1/CALR/TP53/CCND1/TFDP2/CARM1/E2F7/UHRF2/PHOX2B/CCNB1/ID2/ZNF268/PCNA/ATM	25
BP	GO:0060541	respiratory system development	38/1785	198/18670	2.35375e-05	0.000626621	0.000477247	RARG/NPHP3/SIX4/ASCL1/CCBE1/SRSF6/SKI/SPRY1/MAPK1/GATA6/RARA/BASP1/FGFRL1/PKD1/MAP2K1/HHIP/CREB1/FBXW7/RDH10/ASXL1/KRAS/VEGFA/GLI2/LOX/WNT7B/PHOX2B/ITGA3/ZFPM2/PDPN/NFIB/SLC7A11/MYOCD/TGFBR2/NOTCH1/LRP6/FGF9/THRB/RBPJ	38
BP	GO:0072148	epithelial cell fate commitment	8/1785	15/18670	2.39018e-05	0.000632526	0.000481745	NKX2-2/NR2F2/RARA/NEUROD1/ACVR1/PDPN/NOTCH1/RBPJ	8
BP	GO:0043010	camera-type eye development	54/1785	319/18670	2.39705e-05	0.000632526	0.000481745	RARG/ARID1A/NHS/CACNA1C/SIX3/PAX2/MITF/ZEB1/RAB11FIP4/SKI/TGFBR1/CC2D2A/LCTL/JUN/RARA/CASP2/FJX1/SOS1/NEUROD1/PTPRM/FZD5/TBC1D20/RDH10/MAX/FRS2/SKIL/BAK1/VEGFA/TMEM231/WNT7B/SMAD3/PHACTR4/DCX/RXRA/VIM/ATP2B1/HIPK1/SLC7A11/NF2/JAG1/LPCAT1/YY1/RS1/HIF1A/TGFBR2/PYGO2/PITX2/SLC25A25/LRP6/PKNOX1/EPHB2/FOXF2/THRB/BCL11B	54
BP	GO:0030010	establishment of cell polarity	29/1785	135/18670	2.48396e-05	0.000652584	0.000497021	CYP26B1/PTK2B/CCR7/NDEL1/WEE1/LLGL1/AMOTL2/SPRY1/MARK2/AMOT/RAB10/MPP5/ARF6/CLASP1/AMOTL1/ROCK2/RHOA/PKD1/RNF41/MAP1B/HSP90AA1/RAB11FIP2/CRKL/ACTR1A/RAP1B/RICTOR/DOCK7/PAFAH1B1/MSN	29
BP	GO:0000381	regulation of alternative mRNA splicing, via spliceosome	18/1785	65/18670	2.5428e-05	0.000665126	0.000506574	ZBTB7A/RBFOX1/SRSF6/CELF1/MBNL2/RNPS1/SREK1/MBNL1/REST/WTAP/DDX5/RBFOX2/SRSF2/RBM25/DYRK1A/PTBP1/HNRNPU/SRRM4	18
BP	GO:0051170	import into nucleus	33/1785	163/18670	2.58934e-05	0.000674355	0.000513603	KPNA2/KPNB1/PIK3R1/SIX3/KPNA1/SNRPB/CDKN1A/TNPO2/MAPK1/PHB2/NPAP1/RANBP6/KPNA6/ARNTL/NUP50/TNPO1/BACH2/SNRPD1/PRKCD/FAM53C/TP53/NUP153/TXNIP/IPO5/SMAD3/IPO7/SIX2/RANBP2/NXT2/APPL1/SNRPD3/NUP98/FGF9	33
BP	GO:0035966	response to topologically incorrect protein	38/1785	199/18670	2.64584e-05	0.000686085	0.000522536	PIK3R1/GFPT1/KLHL15/HSP90B1/PARP16/EDEM3/KLHDC3/SERP1/CREBRF/SSR1/HDGF/YOD1/PPP1R15B/DNAJB4/DNAJB9/TMEM33/DNAJA1/ATF6B/TMBIM6/UGGT1/CUL3/CALR/CCND1/PDIA6/BAK1/CANX/HSP90AA1/HSPA4L/EXTL3/THBS1/CHAC1/ATF3/CTDSP2/CREB3L2/HYOU1/HSPA4/NFE2L2/ATXN3	38
BP	GO:0010721	negative regulation of cell development	57/1785	344/18670	2.72458e-05	0.00070346	0.000535769	MYLIP/ASCL1/SNAPIN/PMP22/SIX3/IDH2/NKX2-2/PTEN/CLDN18/SKI/RTN4R/ADCY6/EFNA1/YWHAH/RTN4RL1/APP/DCC/DICER1/ARF6/GDI1/RHOA/SEMA6A/SEMA4C/CALR/TP53/COL3A1/FBXW7/CORO1C/EPHA4/CARM1/REST/VEGFA/PHOX2B/CTDSP1/ITM2C/MIB1/VIM/WNT3A/SLIT2/FOXO3/ID2/RCC2/JAG1/YY1/FSTL4/RAPGEF2/KREMEN1/SEMA6D/LRIG2/NOTCH1/EPHB2/PAFAH1B1/ARHGDIA/SEMA7A/THRB/GPR173/NGFR	57
BP	GO:1903050	regulation of proteolysis involved in cellular protein catabolic process	40/1785	214/18670	2.75229e-05	0.000707563	0.000538894	ARIH1/USP25/PTK2B/DDA1/WAC/N4BP1/PTEN/SMARCC1/PSME3/TRIM67/UBB/SENP1/EFNA1/YOD1/SOCS5/AURKA/BTRC/TMTC3/USP14/PKD1/FBXW7/EPHA4/RAD23B/UBQLN4/SMURF1/TRIB3/ARIH2/OGT/CAV1/HFE/UBQLN1/SMAD7/PBK/CBFA2T3/RNF14/TMF1/PSMF1/NFE2L2/FOXF2/ATXN3	40
BP	GO:0016241	regulation of macroautophagy	34/1785	171/18670	2.91521e-05	0.000739945	0.000563557	PIP4K2A/SESN3/WAC/PAFAH1B2/PRKAB2/SNX5/MTMR3/PIM2/ULK1/SMCR8/PRKAA2/RNF41/SIRT1/TP53/UBQLN4/RALB/SPTLC2/KDR/SMURF1/RAB1B/RAB3GAP2/UBQLN1/TBC1D25/SCOC/ATP6V0B/SESN2/TBK1/PRKAA1/HIF1A/SH3GLB1/FYCO1/CASP3/MAPK8/SPTLC1	34
BP	GO:0001843	neural tube closure	22/1785	90/18670	2.91531e-05	0.000739945	0.000563557	RARG/NPHP3/ARID1A/PAX2/SKI/CC2D2A/TRIM71/RARA/TRAF6/FZD6/APAF1/SEMA4C/MTHFR/FZD2/DLC1/PHACTR4/FOLR1/MTHFD1L/SALL4/CASP3/VASP/LRP6	22
BP	GO:0014033	neural crest cell differentiation	22/1785	90/18670	2.91531e-05	0.000739945	0.000563557	PDCD6/MAPK1/FN1/EDN1/SEMA6A/SEMA4C/CORO1C/RDH10/PHOX2B/EFNB1/PHACTR4/FOLR1/KLHL12/ACVR1/SNAI2/JAG1/HIF1A/FBXL17/SEMA6D/PITX2/LRP6/SEMA7A	22
BP	GO:0010639	negative regulation of organelle organization	63/1785	393/18670	3.00532e-05	0.000759573	0.000578506	MID1IP1/CCNF/NME6/BCOR/OTUB1/MLLT6/SKI/ESPL1/TAOK1/TWF1/CHEK1/TUBB4A/TMEM67/TNKS2/CDT1/SET/KAT2B/KDM5A/SPTBN2/CAPZA2/FNIP1/APC2/CLASP1/HMGA1/CAMSAP2/SMCR8/ZNF207/SLC35F6/PRKCD/RNF41/SIRT1/TP53/LIMA1/SIAH3/MAPRE1/BAG4/STMN1/UBE2B/RDX/DLC1/MAP1B/JARID2/NPM1/CAPZA1/PHF8/CCNB1/SLIT2/MID1/MTPN/INSIG1/HNRNPC/ATAD2/PRKAR1A/MTF2/RAD50/CAPZB/DYRK1A/BUB3/ATM/CAMSAP1/SIRT4/HNRNPU/FXN	63
BP	GO:0050657	nucleic acid transport	37/1785	193/18670	3.0704e-05	0.00076364	0.000581604	IGF2BP3/RRS1/DDX39B/KHSRP/ZFP36L1/FLOT1/RBFOX1/SRSF6/SMG1/AGFG1/RNPS1/PABPN1/NUP50/G3BP2/HNRNPA3/KIF5C/NUP153/YTHDC1/BICD2/IGF2BP1/PURA/NPM1/RANBP2/PHAX/EIF5A2/NXT2/MYO1C/AHCTF1/SRSF2/SIDT2/IGF2BP2/TGFBR2/NUP98/HNRNPU/SMG7/NUP210/PARP11	37
BP	GO:0050658	RNA transport	37/1785	193/18670	3.0704e-05	0.00076364	0.000581604	IGF2BP3/RRS1/DDX39B/KHSRP/ZFP36L1/FLOT1/RBFOX1/SRSF6/SMG1/AGFG1/RNPS1/PABPN1/NUP50/G3BP2/HNRNPA3/KIF5C/NUP153/YTHDC1/BICD2/IGF2BP1/PURA/NPM1/RANBP2/PHAX/EIF5A2/NXT2/MYO1C/AHCTF1/SRSF2/SIDT2/IGF2BP2/TGFBR2/NUP98/HNRNPU/SMG7/NUP210/PARP11	37
BP	GO:1901654	response to ketone	37/1785	193/18670	3.0704e-05	0.00076364	0.000581604	CCR7/NKX2-2/TGFBR3/NCOA2/CLDN1/GABRB1/ADCY6/FBXO32/CDKN1A/TFAP4/EDN1/ROCK2/DDIT4/PRKAA2/NR3C1/CALR/SIRT1/FOS/CCND1/TXNIP/CFTR/CAV1/CBL/PRKCE/KCNJ11/SLIT2/ATP2B1/HOXD13/FOXO3/THBS1/DSG2/PCK1/PRKAA1/PCNA/NDOR1/MSN/FOXO1	37
BP	GO:0072659	protein localization to plasma membrane	46/1785	260/18670	3.07241e-05	0.00076364	0.000581604	PIK3R1/PDPK1/KIF5B/FLOT1/ATP1B3/NFASC/AP2M1/ITGB1/RAB10/MYO5A/MPP5/KIF13A/EZR/RAB13/ARF6/PACSIN1/GGA2/ROCK2/GOLGA7/GOPC/BAG4/PIP5K1A/SMURF1/RDX/PACS2/RER1/ITGA3/RAB11FIP2/WNK3/PRKCE/KCNJ11/WNT3A/PICALM/SEC23A/FAM126A/SCN3B/VPS4A/RAPGEF2/DPP6/VAMP8/SQSTM1/APPL1/RAB15/LRP6/EPHB2/STXBP1	46
BP	GO:0001655	urogenital system development	55/1785	330/18670	3.16863e-05	0.000784302	0.00059734	CYP26B1/RARG/NPHP3/SIX4/HAS2/PAX2/PTEN/TMED10/SALL1/TGFBR1/SMARCC1/SPRY1/PCSK5/CEP55/FGF2/RARA/GCNT1/BASP1/AMER1/RARB/PLAG1/PKD1/APAF1/EPHA4/RDH10/EMX2/IRX2/FRS2/VEGFA/GLI2/PDGFB/WNT7B/WNT4/SMAD3/PODXL/ITGA3/MTSS1/SMAD7/CRKL/SIX2/APH1A/RXRA/SLIT2/HOXD13/SMAD1/TIPARP/ID2/JAG1/TBX18/MYOCD/MYC/NOTCH1/PYGO2/COL4A4/EPHB2	55
BP	GO:0006479	protein methylation	35/1785	179/18670	3.24016e-05	0.000788972	0.000600897	MECP2/SETD5/SETD1B/KMT2D/BCOR/MLLT6/KMT2E/SNRPB/NSD1/KMT2A/SUZ12/EZH1/TET3/ARID4B/BTG2/SETD1A/ASH1L/SIRT1/EZH2/CARM1/MTHFR/PRDM4/OGT/PHF19/PCMT1/JARID2/BRD4/PRDM2/RLF/FBXO11/MTF2/ICMT/BTG1/PYGO2/SNRPD3	35
BP	GO:0008213	protein alkylation	35/1785	179/18670	3.24016e-05	0.000788972	0.000600897	MECP2/SETD5/SETD1B/KMT2D/BCOR/MLLT6/KMT2E/SNRPB/NSD1/KMT2A/SUZ12/EZH1/TET3/ARID4B/BTG2/SETD1A/ASH1L/SIRT1/EZH2/CARM1/MTHFR/PRDM4/OGT/PHF19/PCMT1/JARID2/BRD4/PRDM2/RLF/FBXO11/MTF2/ICMT/BTG1/PYGO2/SNRPD3	35
BP	GO:1903034	regulation of response to wounding	35/1785	179/18670	3.24016e-05	0.000788972	0.000600897	NDEL1/PTEN/SRSF6/RTN4R/CDKN1A/RTN4RL1/CASK/FGF2/RREB1/EDN1/CLEC7A/TFPI/CLASP1/PROS1/PRKCD/MAP2K1/EPHA4/PDGFB/CAV1/WNT4/SMAD3/PRKCE/SIGLEC10/PDPN/THBS1/VKORC1/KREMEN1/F2R/ANXA5/LYN/TGFBR2/LRIG2/NFE2L2/F2RL1/TLR4	35
BP	GO:0001654	eye development	59/1785	362/18670	3.2597e-05	0.000788972	0.000600897	RARG/ARID1A/NHS/CACNA1C/SIX3/PAX2/MITF/ZEB1/RAB11FIP4/SH3PXD2B/SKI/TGFBR1/CC2D2A/LCTL/JUN/RARA/CASP2/CHRDL1/RARB/FJX1/SOS1/NEUROD1/PTPRM/FZD5/TBC1D20/RDH10/MAX/FRS2/SKIL/BAK1/VEGFA/TMEM231/SALL2/WNT7B/SMAD3/PHACTR4/DCX/RXRA/VIM/ATP2B1/HIPK1/SLC7A11/NF2/JAG1/LPCAT1/YY1/RS1/HIF1A/TGFBR2/PYGO2/PITX2/SLC25A25/LRP6/PKNOX1/EPHB2/FOXF2/FGF9/THRB/BCL11B	59
BP	GO:0032386	regulation of intracellular transport	60/1785	370/18670	3.26607e-05	0.000788972	0.000600897	PPM1A/PIK3R1/SAR1B/YWHAZ/NDEL1/PDPK1/KIF5B/PTPN14/BAP1/UNC13D/YWHAH/YOD1/MAPK1/YWHAQ/YWHAE/SAR1A/SNX12/EZR/GDI1/FYN/PRKCD/TMEM30B/MAP2K1/RAB21/SREBF2/FZD5/TP53/TBC1D20/FBXW7/SIAH3/TFDP2/PPP1R12A/ADORA2B/NPEPPS/NUP153/BAG4/TCF7L2/ARHGAP1/RDX/ARIH2/IPO5/MAP1B/SMAD3/PMAIP1/MYO1C/INSIG1/HAX1/PRKAA1/VAMP8/SH3GLB1/LYN/ARF1/GCC2/ERBB2/SIRT4/LEPROT/MAPK8/MSN/ANP32B/STXBP1	60
BP	GO:0050678	regulation of epithelial cell proliferation	61/1785	378/18670	3.26653e-05	0.000788972	0.000600897	GLUL/HMGB1/SIX4/PDPK1/B4GALT1/HAS2/PAX2/CDK6/TGFBR3/MAP2K5/NRAS/ZFP36L1/TGFA/PTEN/SRSF6/TGFBR1/PDCD6/HMGB2/LAMC1/JUN/CASK/FGF2/RREB1/RUNX3/NR2F2/PHB2/ITGB3/NOTCH2/SP1/PTPRM/SIRT1/CCND1/FBXW7/TCF7L2/FRS2/KDR/VEGFA/PDGFB/CAV1/RB1/SMAD3/MTSS1/AKT3/WNT3A/SNAI2/NFIB/THBS1/AIMP1/FLT1/RICTOR/ADAM17/MYC/HIF1A/NOTCH1/PYGO2/ERBB2/ZNF703/FGF9/SYNJ2BP/BCL11B/NGFR	61
BP	GO:0050684	regulation of mRNA processing	29/1785	137/18670	3.31666e-05	0.000795099	0.000605564	ZBTB7A/ZFP36L1/RBFOX1/SRSF6/CELF1/MBNL2/CPEB3/DAZAP1/RNPS1/PABPN1/SREK1/MBNL1/REST/YTHDC1/WTAP/DDX5/RBFOX2/NUDT21/CCNB1/SON/SRSF2/RBM25/DYRK1A/CPEB1/CCNT1/PTBP1/NUP98/HNRNPU/SRRM4	29
BP	GO:0016049	cell growth	74/1785	484/18670	3.31844e-05	0.000795099	0.000605564	PTK2B/RARG/SGK1/DDX39B/SLC9A6/NDEL1/BDNF/MAP2K5/KMT2D/CAPRIN2/NME6/CPNE5/RPS6KA3/CLSTN1/SH3GL2/BAP1/RTN4R/TGFBR1/CDKN1A/GNG4/ITGB1/PLXNA1/APP/UNC13A/DCC/AURKA/ULK1/FN1/PTCH2/RNF157/EDN1/GDI1/PPP1R9B/RHOA/SEMA6A/DCUN1D3/RAB21/SEMA4C/SIRT1/TP53/EIF4G2/VEGFA/SMURF1/ARIH2/PIN1/MAP1B/RB1/SMAD3/GATA4/ITSN2/HSP90AA1/CRKL/TAF9B/SESN2/WNT3A/SLIT2/MTPN/EXTL3/DDX3X/SERTAD3/PPP2CA/YY1/MYOCD/FSTL4/ADAM17/BTG1…	74
BP	GO:0110053	regulation of actin filament organization	46/1785	261/18670	3.39094e-05	0.000809231	0.000616327	PTK2B/PIK3R1/CCR7/SH3PXD2B/TGFBR1/SYNPO2/TWF1/ACTR2/ELN/RHOC/SPTBN2/CAPZA2/ARF6/CLASP1/ROCK2/RHOA/PRKCD/LIMA1/BAG4/WHAMM/STMN1/PAK3/GBA2/RDX/PLEKHG2/DLC1/EPHA1/WNT4/SMAD3/PPM1F/PRKCE/CAPZA1/ALOX15/SLIT2/MYO1C/MTPN/HAX1/NF2/RICTOR/CFL2/CAPZB/WASL/ARF1/VASP/SPIRE1/F2RL1	46
BP	GO:0048872	homeostasis of number of cells	44/1785	246/18670	3.45239e-05	0.000820627	0.000625006	FLVCR1/HMGB1/CCR7/ZBTB7A/ETS1/CYLD/CDK6/TGFBR3/ZFP36L1/KMT2E/BAP1/ACVR2A/SENP1/HMGB2/SOS1/PTBP3/EZH2/ASXL1/KRAS/SKIL/BAK1/VEGFA/RB1/PMAIP1/CCR2/RBFOX2/AKT3/FOXO3/SLC7A11/ID2/CSF1/ACIN1/ADAM17/HIF1A/F2R/MPL/NCAPG2/LYN/CASP3/NOTCH1/CEBPG/PKNOX1/ZC3H8/BCR	44
BP	GO:0034629	cellular protein-containing complex localization	10/1785	24/18670	3.47188e-05	0.000821999	0.000626051	KLHL21/SNAPIN/NACC2/EZR/TNFAIP2/RALB/SMAD7/RCC2/WASL/SGCD	10
BP	GO:0060606	tube closure	22/1785	91/18670	3.50189e-05	0.000825839	0.000628975	RARG/NPHP3/ARID1A/PAX2/SKI/CC2D2A/TRIM71/RARA/TRAF6/FZD6/APAF1/SEMA4C/MTHFR/FZD2/DLC1/PHACTR4/FOLR1/MTHFD1L/SALL4/CASP3/VASP/LRP6	22
BP	GO:0048880	sensory system development	60/1785	371/18670	3.541e-05	0.000831789	0.000633507	RARG/ARID1A/NHS/CACNA1C/SIX3/PAX2/MITF/ZEB1/RAB11FIP4/SH3PXD2B/SKI/TGFBR1/CC2D2A/LCTL/JUN/RARA/CASP2/CHRDL1/RARB/FJX1/SOS1/NEUROD1/PTPRM/FZD5/TBC1D20/RDH10/MAX/FRS2/SKIL/BAK1/VEGFA/TMEM231/SALL2/WNT7B/SMAD3/PHOX2B/PHACTR4/DCX/RXRA/VIM/ATP2B1/HIPK1/SLC7A11/NF2/JAG1/LPCAT1/YY1/RS1/HIF1A/TGFBR2/PYGO2/PITX2/SLC25A25/LRP6/PKNOX1/EPHB2/FOXF2/FGF9/THRB/BCL11B	60
BP	GO:0002011	morphogenesis of an epithelial sheet	16/1785	55/18670	3.64756e-05	0.000853471	0.000650021	PTEN/RHOC/MPP5/RREB1/CLASP1/RHOA/SOS1/LIN7C/PHACTR4/PDPN/CD151/JAG1/ADAM17/NOTCH1/ARHGAP12/LRP6	16
BP	GO:0014031	mesenchymal cell development	21/1785	85/18670	3.70504e-05	0.000863548	0.000657696	PDCD6/MAPK1/FN1/EDN1/SEMA6A/SEMA4C/CORO1C/RDH10/PHOX2B/EFNB1/PHACTR4/FOLR1/KLHL12/ACVR1/SNAI2/JAG1/HIF1A/SEMA6D/NOTCH1/PITX2/SEMA7A	21
BP	GO:0070997	neuron death	57/1785	348/18670	3.81562e-05	0.000881471	0.000671346	CDC34/PTK2B/MECP2/SIX4/ASCL1/TNFRSF21/PDPK1/BDNF/EN2/UNC5B/NR4A2/UBB/OXR1/SET/APP/NONO/DCC/JUN/CD200R1/CASP2/BTG2/RHOA/DDIT4/FYN/APAF1/RRAS2/SIRT1/TP53/FOS/CREB1/FBXW7/MAX/PAK3/REST/BTBD10/KRAS/PIN1/CBL/RB1/WNT3A/PICALM/FOXO3/SLC7A11/TBK1/NAMPT/CSF1/HIF1A/F2R/ATM/GFRAL/CASP3/HYOU1/CHL1/THRB/NGFR/STXBP1/TLR4	57
BP	GO:0008584	male gonad development	29/1785	138/18670	3.82137e-05	0.000881471	0.000671346	SIX4/FNDC3A/TFAP2C/HOXA10/HOXA9/TGFBR1/ACVR2A/UBB/AGO4/HMGB2/KDM5A/GATA6/RARA/ARID4B/RAB13/RHOBTB3/TBC1D20/CCND1/SF1/WNT4/CBL/GATA4/CRKL/ZFPM2/PLEKHA1/CSDE1/TMF1/FGF9/CITED2	29
BP	GO:0008406	gonad development	40/1785	217/18670	3.82608e-05	0.000881471	0.000671346	SIX4/FNDC3A/TFAP2C/HOXA10/HOXA9/SALL1/TGFBR1/ACVR2A/UBB/AGO4/HMGB2/KDM5A/GATA6/RARA/ARID4B/CASP2/BASP1/RAB13/RHOBTB3/SIRT1/TBC1D20/CCND1/RDH10/VEGFA/SF1/WNT4/CBL/GATA4/CRKL/ZFPM2/SLIT2/PLEKHA1/FOXO3/TIPARP/CSDE1/ATM/TMF1/CASP3/FGF9/CITED2	40
BP	GO:0007548	sex differentiation	47/1785	270/18670	3.86558e-05	0.000885906	0.000674724	SIX4/FNDC3A/TFAP2C/HOXA10/HOXA9/SALL1/TGFBR1/ACVR2A/UBB/AGO4/HMGB2/KDM5A/CBX2/GATA6/RARA/ARID4B/CASP2/BASP1/RAB13/RHOBTB3/PKD1/SIRT1/TBC1D20/CCND1/RDH10/BAK1/VEGFA/SF1/WNT4/CBL/GATA4/CRKL/ZFPM2/SLIT2/HOXD13/PLEKHA1/FOXO3/TIPARP/DACH1/CSDE1/ATM/TMF1/CASP3/LRP6/FOXF2/FGF9/CITED2	47
BP	GO:0003170	heart valve development	17/1785	61/18670	3.87491e-05	0.000885906	0.000674724	MDM4/EFNA1/ELN/NOTCH2/ROCK2/FGFRL1/ADAMTS9/RB1/GATA4/ACVR1/SLIT2/SNAI2/JAG1/MATR3/TGFBR2/NOTCH1/RBPJ	17
BP	GO:0000083	regulation of transcription involved in G1/S transition of mitotic cell cycle	11/1785	29/18670	4.01553e-05	0.0009111	0.000693912	E2F6/BACH1/CDT1/CCNE1/RRM2/TFDP2/E2F7/RB1/BRD4/ID2/PCNA	11
BP	GO:0051642	centrosome localization	11/1785	29/18670	4.01553e-05	0.0009111	0.000693912	NDEL1/KIF5B/SUN2/PLXNA2/AURKA/EZR/BICD2/RANBP2/DYNC1LI2/PAFAH1B1/NIN	11
BP	GO:0048048	embryonic eye morphogenesis	12/1785	34/18670	4.15719e-05	0.000939682	0.000715681	RARG/ARID1A/SIX3/PAX2/ZEB1/RARB/FZD5/FRS2/PHACTR4/HIPK1/LRP6/FOXF2	12
BP	GO:0035051	cardiocyte differentiation	33/1785	167/18670	4.31744e-05	0.000972235	0.000740474	ARID1A/DDX39B/TGFBR3/TTN/SIK1/SPRY1/ITGB1/MAPK1/GATA6/RARA/PDCD4/EDN1/RARB/CALR/FRS2/REST/VEGFA/PIN1/GATA4/FOLR1/ACVR1/RXRA/CCNB1/WNT3A/KDM6B/JAG1/YY1/MYOCD/SGCD/NOTCH1/PITX2/HNRNPU/RBPJ	33
BP	GO:0046546	development of primary male sexual characteristics	29/1785	139/18670	4.39455e-05	0.000985892	0.000750876	SIX4/FNDC3A/TFAP2C/HOXA10/HOXA9/TGFBR1/ACVR2A/UBB/AGO4/HMGB2/KDM5A/GATA6/RARA/ARID4B/RAB13/RHOBTB3/TBC1D20/CCND1/SF1/WNT4/CBL/GATA4/CRKL/ZFPM2/PLEKHA1/CSDE1/TMF1/FGF9/CITED2	29
BP	GO:0033044	regulation of chromosome organization	56/1785	342/18670	4.48377e-05	0.00100216	0.000763262	AXIN2/MECP2/SETD5/BCOR/OTUB1/MLLT6/KMT2E/SKI/ESPL1/NSD1/RPS6KA5/SMG1/CDC27/CHEK1/KMT2A/TNKS2/CDT1/SET/SPTY2D1/KDM5A/MAPK1/NEK7/HMGA1/ZNF207/HECW2/SETD1A/CUL3/HMBOX1/SIRT1/TP53/MTHFR/UBE2B/VEGFA/OGT/PHF19/RB1/JARID2/PHF8/CCNB1/MKI67/TLK1/BRD4/SNAI2/HNRNPC/ATAD2/MTF2/RAD50/MYOCD/MYC/MIER1/BUB3/ATM/PYGO2/MAPK8/HNRNPU/SMG7	56
BP	GO:0150063	visual system development	59/1785	366/18670	4.50734e-05	0.00100368	0.000764422	RARG/ARID1A/NHS/CACNA1C/SIX3/PAX2/MITF/ZEB1/RAB11FIP4/SH3PXD2B/SKI/TGFBR1/CC2D2A/LCTL/JUN/RARA/CASP2/CHRDL1/RARB/FJX1/SOS1/NEUROD1/PTPRM/FZD5/TBC1D20/RDH10/MAX/FRS2/SKIL/BAK1/VEGFA/TMEM231/SALL2/WNT7B/SMAD3/PHACTR4/DCX/RXRA/VIM/ATP2B1/HIPK1/SLC7A11/NF2/JAG1/LPCAT1/YY1/RS1/HIF1A/TGFBR2/PYGO2/PITX2/SLC25A25/LRP6/PKNOX1/EPHB2/FOXF2/FGF9/THRB/BCL11B	59
BP	GO:0002573	myeloid leukocyte differentiation	38/1785	204/18670	4.6675e-05	0.00103167	0.000785742	PIK3R1/CCR7/CDK6/MITF/ZFP36L1/CLDN18/APP/JUN/RARA/NOTCH2/TRAF6/OSTM1/GLO1/SIRT1/FOS/CREB1/FBXW7/SH3PXD2A/VEGFA/RB1/TOB2/SNX10/TSPAN2/ID2/HAX1/CSF1/CBFA2T3/ACIN1/MYC/KLF10/LYN/TGFBR2/LBR/PAFAH1B1/FASN/RBPJ/F2RL1/TLR4	38
BP	GO:0006473	protein acetylation	38/1785	204/18670	4.6675e-05	0.00103167	0.000785742	HCFC1/CPA4/MECP2/SETD5/NAA30/CRTC2/TAOK1/CLOCK/RPS6KA5/MSL1/CHEK1/MRGBP/KMT2A/SET/KAT2B/DPF1/ARNTL/PRKAA2/NCOA3/SIRT1/YEATS4/KANSL1/OGT/NAA50/KANSL1L/TAF9B/NAA15/SNAI2/DPF2/MSL2/MYOCD/PCK1/PRKAA1/MORF4L2/PYGO2/KAT6B/FOXO1/NAA25	38
BP	GO:0010952	positive regulation of peptidase activity	37/1785	197/18670	4.86358e-05	0.00106869	0.000813934	HMGB1/TNFRSF10B/ACER2/HIP1/PDCD6/PSME3/SENP1/EFNA1/APP/TFAP4/FN1/CLEC7A/ROCK2/RHOA/FYN/APAF1/SIRT1/EPHA4/PERP/GRIN2A/REST/BAK1/DLC1/CAV1/SMAD3/PMAIP1/PPM1F/BCL2L13/WNT3A/PICALM/DDX3X/MYC/F2R/LYN/DAP/ANP32B/NGFR	37
BP	GO:0032956	regulation of actin cytoskeleton organization	56/1785	343/18670	4.87065e-05	0.00106869	0.000813934	PTK2B/PIK3R1/CCR7/EPHA5/SH3PXD2B/TAOK1/TGFBR1/SYNPO2/TWF1/ABL2/ACTR2/ELN/RHOC/SPTBN2/RND3/CAPZA2/NOTCH2/ARF6/RHOBTB3/EDN1/CLASP1/ROCK2/RHOA/PRKCD/LIMA1/BAG4/WHAMM/STMN1/PAK3/GBA2/CD2AP/RDX/PLEKHG2/DLC1/EPHA1/WNT4/SMAD3/PPM1F/RHOB/PRKCE/CAPZA1/ALOX15/SLIT2/MYO1C/MTPN/HAX1/NF2/RICTOR/CFL2/CAPZB/WASL/ARF1/VASP/ARHGDIA/SPIRE1/F2RL1	56
BP	GO:0042770	signal transduction in response to DNA damage	28/1785	133/18670	4.98648e-05	0.00109011	0.00083025	MDM4/BCL3/ACER2/ZNF385A/CHEK1/CDKN1A/AURKA/CNOT6L/TFAP4/CASP2/BTG2/HIC1/SIRT1/TP53/TFDP2/CARM1/E2F7/PMAIP1/PPM1D/DDX5/CCNB1/SESN2/FOXO3/SPRED1/SNAI2/DYRK1A/PCNA/ATM	28
BP	GO:0002262	myeloid cell homeostasis	30/1785	147/18670	5.0582e-05	0.00110177	0.000839129	FLVCR1/HMGB1/ZBTB7A/ETS1/CDK6/TGFBR3/ZFP36L1/KMT2E/BAP1/ACVR2A/SENP1/HMGB2/PTBP3/BAK1/VEGFA/RB1/CCR2/RBFOX2/FOXO3/SLC7A11/ID2/ACIN1/ADAM17/HIF1A/MPL/NCAPG2/LYN/CASP3/CEBPG/PKNOX1	30
BP	GO:0050770	regulation of axonogenesis	35/1785	183/18670	5.22681e-05	0.00112966	0.00086037	NDEL1/BDNF/PTEN/TRAK1/RTN4R/EFNA1/PLXNA2/MARK2/PLXNA1/DCC/FN1/GDI1/PLXND1/RHOA/SEMA6A/MAP2K1/RAB21/SEMA4C/EPHA4/PAK3/SKIL/VEGFA/YTHDF1/MAP1B/WNT3A/SLIT2/FSTL4/SIPA1L1/SEMA6D/EPHB2/PAFAH1B1/NIN/ARHGDIA/SEMA7A/NGFR	35
BP	GO:0046777	protein autophosphorylation	42/1785	235/18670	5.24282e-05	0.00112966	0.00086037	MINK1/PTK2B/MKNK2/IGF1R/PDPK1/CSNK1G2/PIM1/SIK1/TAOK1/PIM2/SMG1/MAP3K9/ABL2/MARK2/JUN/AURKA/CAMKK2/ULK1/MAP3K3/FYN/EPHA4/RAP2C/FRK/KDR/VEGFA/PDGFB/EPHA1/CAV1/PAK2/WNK3/STK4/CALM1/FLT1/PPP2R5E/RAD50/DYRK1A/ATM/LYN/ERBB2/NLK/BCR/EPHB4	42
BP	GO:0060560	developmental growth involved in morphogenesis	42/1785	235/18670	5.24282e-05	0.00112966	0.00086037	RARG/SIX4/SLC9A6/NDEL1/BDNF/CPNE5/SH3GL2/SALL1/RTN4R/SPRY1/ITGB1/PLXNA1/APP/UNC13A/DCC/AURKA/ULK1/FN1/RNF157/GDI1/SEMA6A/RAB21/SEMA4C/RDH10/VEGFA/SMURF1/WNT7B/MAP1B/ITSN2/HSP90AA1/WNT3A/SLIT2/HOXD13/CSF1/FSTL4/SEMA6D/TGFBR2/NOTCH1/LRP6/PAFAH1B1/NIN/SEMA7A	42
BP	GO:0002068	glandular epithelial cell development	10/1785	25/18670	5.29177e-05	0.00113206	0.000862201	RARG/PDPK1/CDK6/NKX2-2/CLOCK/RFX3/RARA/RARB/ARNTL/SIDT2	10
BP	GO:0035459	vesicle cargo loading	10/1785	25/18670	5.29177e-05	0.00113206	0.000862201	SEC24A/TMED10/KIF13A/SAR1A/TBC1D20/RAB1A/PICALM/SEC23A/INSIG1/SEC24C	10
BP	GO:0006986	response to unfolded protein	34/1785	176/18670	5.38664e-05	0.00114826	0.000874534	PIK3R1/GFPT1/HSP90B1/PARP16/EDEM3/KLHDC3/SERP1/CREBRF/SSR1/HDGF/YOD1/PPP1R15B/DNAJB4/DNAJB9/TMEM33/DNAJA1/ATF6B/TMBIM6/CALR/CCND1/PDIA6/BAK1/CANX/HSP90AA1/HSPA4L/EXTL3/THBS1/CHAC1/ATF3/CTDSP2/CREB3L2/HYOU1/HSPA4/NFE2L2	34
BP	GO:0060538	skeletal muscle organ development	33/1785	169/18670	5.52627e-05	0.00117384	0.000894023	CYP26B1/FOXN2/SIX4/ACTA1/FLOT1/SKI/ZBTB18/ELN/BCL9/NR2F2/BCL9L/BTG2/BASP1/GPCPD1/MEF2D/ARNTL/RHOA/NLN/FGFRL1/CCNT2/FOS/HIVEP3/CAV1/RB1/PHOX2B/DDX5/AKIRIN1/WNT3A/ATF3/CFL2/MYOCD/PRKAA1/NOTCH1	33
BP	GO:0042692	muscle cell differentiation	61/1785	385/18670	5.65472e-05	0.00119688	0.00091157	CYP26B1/MECP2/SIX4/ARID1A/DDX39B/ACTA1/BDNF/ZEB1/FLOT1/CHRNB1/SKI/ATP2A2/TTN/SIK1/CACNA2D2/ITGB1/BCL9/GATA6/RARA/PDCD4/EDN1/RARB/NLN/SEMA4C/CALR/SIRT1/EZH2/PTGFRN/FRS2/CSRP1/KRAS/VEGFA/LOX/PDGFB/WNT4/DMD/PIN1/RB1/BNIP2/GATA4/RORA/ACVR1/RXRA/CCNB1/WNT3A/MTPN/KDM6B/PRKAR1A/TARBP2/YY1/CFL2/MYOCD/CSRP2/SGCD/PTBP1/MORF4L2/CASP3/NOTCH1/HNRNPU/FGF9/RBPJ	61
BP	GO:0014032	neural crest cell development	20/1785	81/18670	5.68046e-05	0.0011969	0.000911582	PDCD6/MAPK1/FN1/EDN1/SEMA6A/SEMA4C/CORO1C/RDH10/PHOX2B/EFNB1/PHACTR4/FOLR1/KLHL12/ACVR1/SNAI2/JAG1/HIF1A/SEMA6D/PITX2/SEMA7A	20
BP	GO:0010977	negative regulation of neuron projection development	31/1785	155/18670	5.72512e-05	0.0011969	0.000911582	MYLIP/SNAPIN/PMP22/PTEN/RTN4R/ADCY6/EFNA1/YWHAH/RTN4RL1/DCC/ARF6/GDI1/RHOA/SEMA6A/SEMA4C/EPHA4/CARM1/ITM2C/VIM/WNT3A/SLIT2/FSTL4/RAPGEF2/KREMEN1/SEMA6D/LRIG2/EPHB2/PAFAH1B1/ARHGDIA/SEMA7A/NGFR	31
BP	GO:0043687	post-translational protein modification	58/1785	361/18670	5.73349e-05	0.0011969	0.000911582	DDA1/KLHL21/CCNF/SKP2/PSMD3/CALU/KLHL11/FBXL3/ASB6/FEM1C/FBXL20/CRTAP/HSP90B1/FBXL13/FBXO32/PSME3/DCAF17/SOCS5/APP/TULP4/LAMC1/BTRC/FN1/RAB13/CHRDL1/FBXW8/DCUN1D3/CUL3/FBXW7/FN3K/PDIA6/KCTD6/VCAN/CHML/DCAF10/DCAF16/RAB1B/RAB1A/FBXO41/SOCS6/PSMA2/FBXL7/PSMA7/FBXO11/CSF1/ICMT/WIPI2/HIF1A/RAB2A/TGOLN2/COPS7B/PSMF1/CUL2/DCAF7/ASB7/KLHL25/FBXL18/WDTC1	58
BP	GO:0048565	digestive tract development	28/1785	134/18670	5.73752e-05	0.0011969	0.000911582	NPHP3/ASCL1/NKX2-2/CLDN18/SALL1/MIXL1/CDKN1A/PCSK5/GATA6/RARB/PKD1/COL3A1/GLI2/RB1/SMAD3/GATA4/CRKL/SIX2/YIPF6/CCNB1/HOXD13/ID2/MYOCD/HIF1A/TGFBR2/NOTCH1/FOXF2/FGF9	28
BP	GO:1904031	positive regulation of cyclin-dependent protein kinase activity	12/1785	35/18670	5.7786e-05	0.0011969	0.000911582	CDKN1A/CCNK/CCND2/PKD1/CCNT2/CCNY/CCND1/PDGFB/CCNB1/ADAM17/CCNT1/MAPRE3	12
BP	GO:0048384	retinoic acid receptor signaling pathway	11/1785	30/18670	5.79467e-05	0.0011969	0.000911582	CYP26B1/RARG/RARA/RARB/CALR/EZH2/ASXL1/CTBP2/CRKL/RXRB/RXRA	11
BP	GO:0061842	microtubule organizing center localization	11/1785	30/18670	5.79467e-05	0.0011969	0.000911582	NDEL1/KIF5B/SUN2/PLXNA2/AURKA/EZR/BICD2/RANBP2/DYNC1LI2/PAFAH1B1/NIN	11
BP	GO:0048639	positive regulation of developmental growth	35/1785	184/18670	5.87162e-05	0.00120863	0.000920514	DDX39B/NDEL1/TGFBR3/BDNF/PIM1/CPNE5/SH3PXD2B/CACNA2D2/SERP1/UNC13A/MAPK1/FGF2/GATA6/BASP1/FN1/EZR/RNF157/EDN1/GDI1/CREB1/VEGFA/SMURF1/PIN1/MAP1B/ITSN2/ZFPM2/CCNB1/WNT3A/CSF1/TGFBR2/NOTCH1/PAFAH1B1/FGF9/SEMA7A/RBPJ	35
BP	GO:1901988	negative regulation of cell cycle phase transition	46/1785	267/18670	6.02702e-05	0.00123636	0.000941641	PSMD3/CDK6/WEE1/MDM4/ZFP36L1/ZFP36L2/PTEN/TAOK1/SLFN11/ZNF385A/PSME3/HMGA2/CHEK1/CDKN1A/CDT1/NACC2/AURKA/CNOT6L/CASP2/BTG2/RBL1/ZNF207/DCUN1D3/TP53/EZH2/CCND1/TFDP2/CARM1/E2F7/RB1/CTDSP1/PSMA2/FBXL7/RFWD3/FOXN3/CCNB1/PSMA7/VPS4A/CDK2AP2/CTDSP2/BUB3/PCNA/ATM/CTDSPL/PSMF1/CLSPN	46
BP	GO:0006109	regulation of carbohydrate metabolic process	37/1785	199/18670	6.07864e-05	0.0012427	0.000946463	PTK2B/ARPP19/PPP1R3B/ZBTB7A/HAS2/NCOA2/EPM2AIP1/SIK1/APP/NUP50/DDIT4/NLN/SCARB2/PRKAA2/IRS1/SIRT1/TP53/NUP153/PDGFB/OGT/PMAIP1/PDK4/RANBP2/IRS2/PRKCE/RORA/SESN2/CBFA2T3/PRKAA1/HIF1A/FOXK1/MIDN/FAM3C/NUP98/FOXO1/FOXK2/NUP210	37
BP	GO:0034968	histone lysine methylation	25/1785	114/18670	6.13972e-05	0.00124709	0.000949807	MECP2/SETD5/SETD1B/KMT2D/BCOR/MLLT6/KMT2E/NSD1/KMT2A/SUZ12/EZH1/TET3/ARID4B/SETD1A/ASH1L/SIRT1/EZH2/OGT/PHF19/JARID2/BRD4/PRDM2/RLF/MTF2/PYGO2	25
BP	GO:0032388	positive regulation of intracellular transport	41/1785	229/18670	6.14175e-05	0.00124709	0.000949807	PPM1A/PIK3R1/SAR1B/YWHAZ/KIF5B/BAP1/YWHAH/MAPK1/YWHAQ/YWHAE/SAR1A/EZR/FYN/PRKCD/TMEM30B/RAB21/SREBF2/FZD5/TP53/TBC1D20/FBXW7/TFDP2/ADORA2B/NPEPPS/TCF7L2/RDX/ARIH2/IPO5/SMAD3/PMAIP1/MYO1C/PRKAA1/VAMP8/SH3GLB1/ARF1/ERBB2/LEPROT/MAPK8/MSN/ANP32B/STXBP1	41
BP	GO:0017038	protein import	36/1785	192/18670	6.33866e-05	0.00128272	0.000976947	KPNA2/KPNB1/PIK3R1/SIX3/GRPEL2/KPNA1/CDKN1A/PEX26/TNPO2/MAPK1/PHB2/TIMM17A/NPAP1/RANBP6/KPNA6/ARNTL/NUP50/PEX13/TNPO1/PRKCD/FAM53C/TP53/NUP153/TXNIP/IPO5/SMAD3/IPO7/HSP90AA1/SIX2/DNAJC15/RANBP2/NXT2/APPL1/HSPA4/NUP98/FGF9	36
BP	GO:1903725	regulation of phospholipid metabolic process	21/1785	88/18670	6.41715e-05	0.00129423	0.000985714	SOCS1/PTK2B/PIK3R1/CCR7/SOCS7/MTMR3/ATG14/SLC27A1/SOCS5/MTMR4/FGF2/VAV3/PRKCD/IRS1/PDGFB/SOCS6/FLT1/LPCAT1/LYN/ARF1/WDR81	21
BP	GO:0050773	regulation of dendrite development	30/1785	149/18670	6.57846e-05	0.00131999	0.00100533	CAPRIN2/MAPK6/PTEN/EFNA1/YWHAH/ACTR2/DCC/CAPRIN1/CPEB3/ARF6/PACSIN1/FBXW8/CAMSAP2/RHOA/HECW2/RAB21/EZH2/EPHA4/CARM1/PAK3/CRKL/PTPRD/C21orf91/FSTL4/SIPA1L1/RAPGEF2/ARF1/PAFAH1B1/SRCIN1/CRTC1	30
BP	GO:0043484	regulation of RNA splicing	28/1785	135/18670	6.58892e-05	0.00131999	0.00100533	PIK3R1/ZBTB7A/RBFOX1/SRSF6/CELF1/RBM20/MBNL2/DAZAP1/RNPS1/TMBIM6/SREK1/HNRNPF/PTBP3/MBNL1/REST/YTHDC1/WTAP/DDX5/RBFOX2/SON/SRSF2/RBM25/DYRK1A/PTBP1/NUP98/HNRNPU/SRRM4/HABP4	28
BP	GO:0007411	axon guidance	47/1785	276/18670	6.76744e-05	0.00135123	0.00102913	PIK3R1/EPHA5/DPYSL5/BDNF/UNC5B/NFASC/RNF165/RPS6KA5/EFNA1/PLXNA2/PLXNA1/APP/DCC/SPTBN2/MAPK1/EZR/KIF5A/PLXND1/SOS1/SEMA6A/FYN/PTPRM/SEMA4C/EPHA4/KIF5C/FRS2/VEGFA/YTHDF1/GLI2/EPHA1/EXT1/EFNB1/IRS2/WNT3A/SLIT2/NFIB/CELSR3/LAMA2/SEMA6D/ERBB2/KIF3A/VASP/EPHB2/EPHB4/SEMA7A/CHL1/BCL11B	47
BP	GO:0006403	RNA localization	41/1785	230/18670	6.79695e-05	0.00135261	0.00103018	IGF2BP3/RRS1/DDX39B/KHSRP/ZFP36L1/FLOT1/RBFOX1/SRSF6/SMG1/ZNF385A/A1CF/AGFG1/RNPS1/PABPN1/NUP50/G3BP2/HNRNPA3/KIF5C/NUP153/YTHDC1/BICD2/IGF2BP1/PURA/NPM1/RANBP2/PHAX/EIF5A2/NXT2/MYO1C/AHCTF1/SRSF2/SIDT2/IGF2BP2/YY1/ATM/TGFBR2/NUP98/HNRNPU/SMG7/NUP210/PARP11	41
BP	GO:0010950	positive regulation of endopeptidase activity	34/1785	178/18670	6.82117e-05	0.00135294	0.00103043	HMGB1/TNFRSF10B/ACER2/HIP1/PDCD6/PSME3/SENP1/EFNA1/TFAP4/CLEC7A/ROCK2/RHOA/FYN/APAF1/SIRT1/EPHA4/PERP/GRIN2A/REST/BAK1/DLC1/SMAD3/PMAIP1/PPM1F/BCL2L13/WNT3A/PICALM/DDX3X/MYC/F2R/LYN/DAP/ANP32B/NGFR	34
BP	GO:0003179	heart valve morphogenesis	15/1785	52/18670	7.0722e-05	0.0013981	0.00106482	MDM4/EFNA1/ELN/NOTCH2/ROCK2/FGFRL1/ADAMTS9/RB1/GATA4/ACVR1/SLIT2/SNAI2/JAG1/TGFBR2/NOTCH1	15
BP	GO:0051961	negative regulation of nervous system development	52/1785	316/18670	7.23649e-05	0.00142587	0.00108597	MYLIP/ASCL1/TNFRSF21/SNAPIN/PMP22/SIX3/IDH2/NKX2-2/PTEN/SKI/RTN4R/ADCY6/EFNA1/YWHAH/RTN4RL1/APP/DCC/DICER1/ARF6/GDI1/RHOA/SEMA6A/SEMA4C/CALR/TP53/COL3A1/EPHA4/CARM1/REST/PHOX2B/CTDSP1/ITM2C/MIB1/VIM/WNT3A/SLIT2/FOXO3/ID2/JAG1/FSTL4/RAPGEF2/KREMEN1/SEMA6D/LRIG2/NOTCH1/EPHB2/PAFAH1B1/ARHGDIA/SEMA7A/THRB/GPR173/NGFR	52
BP	GO:1905477	positive regulation of protein localization to membrane	26/1785	122/18670	7.35895e-05	0.00144446	0.00110013	PIK3R1/YWHAZ/PDPK1/KIF5B/YWHAH/ITGB1/YWHAQ/YWHAE/EZR/ARF6/FYN/TP53/TFDP2/PMAIP1/RER1/ITGA3/RAB11FIP2/WNK3/PRKCE/KCNJ11/WNT3A/MYO1C/SQSTM1/ERBB2/EPHB2/MAPK8	26
BP	GO:0097485	neuron projection guidance	47/1785	277/18670	7.41023e-05	0.00144446	0.00110013	PIK3R1/EPHA5/DPYSL5/BDNF/UNC5B/NFASC/RNF165/RPS6KA5/EFNA1/PLXNA2/PLXNA1/APP/DCC/SPTBN2/MAPK1/EZR/KIF5A/PLXND1/SOS1/SEMA6A/FYN/PTPRM/SEMA4C/EPHA4/KIF5C/FRS2/VEGFA/YTHDF1/GLI2/EPHA1/EXT1/EFNB1/IRS2/WNT3A/SLIT2/NFIB/CELSR3/LAMA2/SEMA6D/ERBB2/KIF3A/VASP/EPHB2/EPHB4/SEMA7A/CHL1/BCL11B	47
BP	GO:0051058	negative regulation of small GTPase mediated signal transduction	16/1785	58/18670	7.43822e-05	0.00144446	0.00110013	TRIM67/SPRY1/ABL2/ITGB1/CUL3/STMN1/CD2AP/DLC1/PPP2CB/TNFAIP1/ITGA3/SLIT2/ARHGAP42/SPRY4/ARHGAP12/EPHB2	16
BP	GO:0008360	regulation of cell shape	30/1785	150/18670	7.48344e-05	0.00144446	0.00110013	PTK2B/DNMBP/CDC42SE1/PLXNA2/MARK2/PLXNA1/RHOC/RND3/FN1/EZR/MYO10/RHOBTB3/PLXND1/RHOA/FERMT2/FYN/WASF3/KDR/VEGFA/RDX/DLC1/RHOB/ARHGAP15/CDC42SE2/BRWD1/PDPN/COCH/LIMD1/MSN/BRWD3	30
BP	GO:0006606	protein import into nucleus	29/1785	143/18670	7.54635e-05	0.00144446	0.00110013	KPNA2/KPNB1/PIK3R1/SIX3/KPNA1/CDKN1A/TNPO2/MAPK1/PHB2/NPAP1/RANBP6/KPNA6/ARNTL/NUP50/TNPO1/PRKCD/FAM53C/TP53/NUP153/TXNIP/IPO5/SMAD3/IPO7/SIX2/RANBP2/NXT2/APPL1/NUP98/FGF9	29
BP	GO:0031056	regulation of histone modification	29/1785	143/18670	7.54635e-05	0.00144446	0.00110013	MECP2/SETD5/BCOR/OTUB1/MLLT6/KMT2E/SKI/NSD1/RPS6KA5/CHEK1/KMT2A/SET/KDM5A/SIRT1/TP53/MTHFR/UBE2B/VEGFA/OGT/PHF19/JARID2/CCNB1/BRD4/SNAI2/MTF2/MYOCD/ATM/PYGO2/MAPK8	29
BP	GO:0043550	regulation of lipid kinase activity	17/1785	64/18670	7.54786e-05	0.00144446	0.00110013	SOCS1/PTK2B/PIK3R1/CCR7/SOCS7/ATG14/SOCS5/FGF2/VAV3/RBL1/IRS1/PDGFB/RB1/SOCS6/FLT1/LYN/WDR81	17
BP	GO:0044783	G1 DNA damage checkpoint	17/1785	64/18670	7.54786e-05	0.00144446	0.00110013	WAC/MDM4/ZNF385A/CDKN1A/AURKA/CNOT6L/CASP2/BTG2/TP53/CCND1/TFDP2/CARM1/E2F7/RFWD3/CCNB1/PCNA/ATM	17
BP	GO:0048645	animal organ formation	17/1785	64/18670	7.54786e-05	0.00144446	0.00110013	HOXA3/AXIN2/PAX2/PIM1/SPRY1/MAPK1/GATA6/MAP2K1/RDH10/FRS2/GLI2/FOLR1/WNT3A/TGFBR2/NOTCH1/CITED2/RBPJ	17
BP	GO:0002504	antigen processing and presentation of peptide or polysaccharide antigen via MHC class II	23/1785	102/18670	7.57406e-05	0.00144486	0.00110044	SAR1B/SEC24A/AP1S1/SH3GL2/KIF23/AP2M1/SPTBN2/CAPZA2/KIF5A/TRAF6/KIF2A/HLA-DRA/CANX/KIF3B/CAPZA1/ACTR1A/SEC23A/THBS1/CAPZB/ARF1/KIF3A/DYNC1LI2/SEC24C	23
BP	GO:0048736	appendage development	34/1785	179/18670	7.66086e-05	0.00145217	0.001106	CYP26B1/FLVCR1/RARG/RECK/CACNA1C/HOXA10/HOXA9/SKI/SALL1/RNF165/PLXNA2/KAT2B/PCSK5/AFF3/NR2F2/RARA/RARB/IMPAD1/FZD6/ZNRF3/MBNL1/RDH10/BAK1/TMEM231/GLI2/HOXD13/SLC7A11/SALL4/KREMEN1/NOTCH1/PITX2/LRP6/SLC39A1/FGF9	34
BP	GO:0060173	limb development	34/1785	179/18670	7.66086e-05	0.00145217	0.001106	CYP26B1/FLVCR1/RARG/RECK/CACNA1C/HOXA10/HOXA9/SKI/SALL1/RNF165/PLXNA2/KAT2B/PCSK5/AFF3/NR2F2/RARA/RARB/IMPAD1/FZD6/ZNRF3/MBNL1/RDH10/BAK1/TMEM231/GLI2/HOXD13/SLC7A11/SALL4/KREMEN1/NOTCH1/PITX2/LRP6/SLC39A1/FGF9	34
BP	GO:0048596	embryonic camera-type eye morphogenesis	10/1785	26/18670	7.86464e-05	0.0014861	0.00113184	ARID1A/SIX3/PAX2/ZEB1/FZD5/FRS2/PHACTR4/HIPK1/LRP6/FOXF2	10
BP	GO:0051261	protein depolymerization	24/1785	109/18670	7.98624e-05	0.00150433	0.00114573	MID1IP1/SH3GL2/TAOK1/TWF1/SPTBN2/CAPZA2/APC2/CLASP1/CAMSAP2/LIMA1/KIF2A/STMN1/RDX/MAP1B/SYNJ1/CAPZA1/MID1/MTPN/CCSAP/VPS4A/CFL2/CAPZB/CAMSAP1/F2RL1	24
BP	GO:0045737	positive regulation of cyclin-dependent protein serine/threonine kinase activity	11/1785	31/18670	8.20938e-05	0.00154151	0.00117405	CCNK/CCND2/PKD1/CCNT2/CCNY/CCND1/PDGFB/CCNB1/ADAM17/CCNT1/MAPRE3	11
BP	GO:0061614	pri-miRNA transcription by RNA polymerase II	14/1785	47/18670	8.32831e-05	0.00155896	0.00118733	ETS1/JUN/SREBF2/NR3C1/TP53/FOS/PDGFB/SMAD3/DDX5/SMAD1/NFIB/YY1/HIF1A/NGFR	14
BP	GO:0043393	regulation of protein binding	39/1785	217/18670	8.42604e-05	0.00157234	0.00119752	HOXA3/SNAPIN/TIRAP/CYLD/TGFBR3/BDNF/CAPRIN2/FLOT1/TGFBR1/PIM2/MARK2/APP/AURKA/ARF6/TMBIM6/PLXND1/PKD1/PRKCD/EPHA4/MAPRE1/CARM1/RALB/STMN1/TCF7L2/BAK1/LOX/TRIB3/PDGFB/CAV1/PIN1/FKBP1A/PPP2CB/HFE/STK4/WNT3A/PPP2CA/RAPGEF2/MAPK8/MAPRE3	39
BP	GO:0003231	cardiac ventricle development	27/1785	130/18670	8.60884e-05	0.00160146	0.0012197	MDM4/TGFBR3/SALL1/TGFBR1/HAND1/FGFRL1/FZD2/FRS2/UBE4B/FKBP1A/GATA4/SMAD7/ACVR1/RXRA/ZFPM2/SLIT2/ID2/JAG1/SALL4/MYOCD/MATR3/HIF1A/TGFBR2/NOTCH1/LUZP1/CITED2/RBPJ	27
BP	GO:0051090	regulation of DNA-binding transcription factor activity	66/1785	432/18670	8.85835e-05	0.00164228	0.00125079	SGK1/ZBTB7A/TIRAP/EPHA5/CYLD/NKX2-2/MAP2K5/PIM1/PTEN/FLOT1/CRTC2/SIK1/CLOCK/RPS6KA5/UBE2V1/UBB/APP/KDM5A/HAND1/JUN/MAPK1/NWD1/BTRC/WWP2/PHB2/EDN1/TRAF6/G3BP2/FZD6/NEUROD1/LRRFIP1/RNF2/PKD1/RNF41/SIRT1/NFAM1/EZH2/FOS/CARM1/FZD2/TCF7L2/KRAS/VEGFA/TRIM5/CAV1/RB1/SMAD3/NPM1/SMAD7/TCEAL7/MTDH/IRAK4/WNT3A/MTPN/ID2/CREBZF/DHX33/MYOCD/CEBPG/LRP6/MAPK8/TAB2/DAP/TRAF1/CRTC1/TLR4	66
BP	GO:0043543	protein acylation	43/1785	248/18670	8.88312e-05	0.00164228	0.00125079	HCFC1/CPA4/GLUL/PPM1A/MECP2/SETD5/NAA30/CRTC2/TAOK1/CLOCK/RPS6KA5/MSL1/ZDHHC5/CHEK1/MRGBP/KMT2A/SET/KAT2B/ZDHHC9/DPF1/ARNTL/PRKAA2/NCOA3/GOLGA7/SIRT1/YEATS4/KANSL1/OGT/NAA50/KANSL1L/TAF9B/NAA15/SNAI2/DPF2/MSL2/MYOCD/PCK1/PRKAA1/MORF4L2/PYGO2/KAT6B/FOXO1/NAA25	43
BP	GO:0048511	rhythmic process	49/1785	295/18670	9.10448e-05	0.00167803	0.00127802	SIX3/HAS2/ETS1/FBXL3/CPT1A/NCOA2/GFPT1/PTEN/ENOX2/GABRB1/SIK1/CLOCK/KMT2A/KAT2B/NONO/KDM5A/AHCY/JUN/BTRC/CASP2/ARNTL/SP1/ROCK2/PRKAA2/CRY2/SIRT1/TP53/EZH2/CREB1/FBXW7/OGT/DDX5/BTBD9/RORA/SLIT2/PLEKHA1/FOXO3/ID2/NAMPT/PRKAA1/CBX3/DYRK1A/KLF10/PCNA/CASP3/MAPK8/HNRNPU/CRTC1/NGFR	49
BP	GO:0090288	negative regulation of cellular response to growth factor stimulus	32/1785	166/18670	9.18659e-05	0.00168797	0.00128559	PPM1A/ZBTB7A/PDPK1/TGFBR3/SKI/TGFBR1/PDCD6/UBB/GLG1/SPRY1/MTMR4/CASK/BCL9L/CHRDL1/SEMA6A/SIRT1/TP53/ONECUT2/SKIL/SMURF1/CAV1/WNT4/PIN1/SMAD3/SMAD7/SLIT2/THBS1/ADAM17/SPRY4/TGFBR2/NOTCH1/PEG10	32
BP	GO:0031345	negative regulation of cell projection organization	35/1785	188/18670	9.23552e-05	0.00169062	0.00128761	MYLIP/SNAPIN/PMP22/PTEN/RTN4R/ADCY6/EFNA1/YWHAH/RTN4RL1/DCC/ARF6/GDI1/RHOA/SEMA6A/FYN/PRKCD/SEMA4C/EPHA4/CARM1/ITGA3/ITM2C/VIM/WNT3A/SLIT2/FSTL4/RAPGEF2/CAPZB/KREMEN1/SEMA6D/LRIG2/EPHB2/PAFAH1B1/ARHGDIA/SEMA7A/NGFR	35
BP	GO:0003002	regionalization	56/1785	351/18670	9.2575e-05	0.00169062	0.00128761	CYP26B1/HOXA3/AXIN2/RARG/ASCL1/SIX3/PAX2/NKX2-2/HOXA10/HOXA9/SKI/PBX3/TGFBR1/ACVR2A/SPRY1/PLXNA2/PCSK5/AURKA/HOXC8/NR2F2/BTG2/BASP1/EDN1/NEUROD1/RNF2/FZD5/TP53/HHIP/EMX2/IRX2/FRS2/GLI2/CHSY1/WNT7B/SMAD3/GATA4/CRKL/SIX2/OTX1/MIB1/ACVR1/WNT3A/HOXD13/HIPK1/MTF2/TBX18/YY1/HOXC4/ATM/CELSR2/NOTCH1/MLLT3/PITX2/LRP6/CITED2/RBPJ	56
BP	GO:0001885	endothelial cell development	16/1785	59/18670	9.30926e-05	0.00169491	0.00129088	CLDN1/EZR/ROCK2/RAP2C/VEGFA/RDX/WNT7B/RAP1B/MARVELD2/RAPGEF2/PDE4D/COL4A4/MSN/FASN/F2RL1/VEZF1	16
BP	GO:0007266	Rho protein signal transduction	37/1785	203/18670	9.36852e-05	0.00170053	0.00129516	TAX1BP3/FLOT1/DNMBP/CDC42SE1/RTN4R/ABL2/ITGB1/RHOC/RND3/VAV3/RHOBTB3/ROCK2/RHOA/SOS1/CUL3/COL3A1/STMN1/ARHGAP1/PLEKHG2/DLC1/TNFAIP1/PHACTR4/ITSN2/ITGA3/RHOB/SPATA13/CDC42SE2/PDPN/ARHGAP42/ARHGAP5/F2R/ARHGEF3/BCR/ARHGDIA/SYNJ2BP/NGFR/F2RL1	37
BP	GO:0071901	negative regulation of protein serine/threonine kinase activity	29/1785	145/18670	9.78478e-05	0.00176587	0.00134492	LATS2/PTEN/DUSP2/CDKN1A/SPRY1/KAT2B/DUSP4/NR2F2/TFAP4/DNAJA1/PDCD4/DUSP14/PRKCD/PRKAR2A/SIRT1/IPO5/CAV1/RB1/IPO7/STK38/SPRED1/PRKAR1A/PPP2CA/MYOCD/LYN/SPRY4/PTPRJ/CASP3/LRP6	29
BP	GO:0048562	embryonic organ morphogenesis	48/1785	288/18670	9.8163e-05	0.00176587	0.00134492	HOXA3/FLVCR1/RARG/NPHP3/SIX4/ARID1A/SIX3/PAX2/ZEB1/LRIG3/SALL1/TGFBR1/EFNA1/USH1G/HAND1/MAPK1/EDN1/RARB/FZD6/NEUROD1/FZD5/RDH10/FZD2/FRS2/GLI2/SMAD3/GATA4/PHACTR4/FOLR1/SIX2/OTX1/MIB1/ACVR1/WNT3A/HIPK1/INSIG1/ID2/MTHFD1L/HOXC4/HIF1A/TGFBR2/NOTCH1/LRP6/EPHB2/BCR/FOXF2/SLC39A1/FGF9	48
BP	GO:0060996	dendritic spine development	22/1785	97/18670	9.81692e-05	0.00176587	0.00134492	SLC9A6/CAPRIN2/MAPK6/PTEN/EFNA1/ACTR2/CAPRIN1/CPEB3/ARF6/SLC12A5/EPHA4/PAK3/PAK2/ACSL4/C21orf91/FSTL4/SIPA1L1/WASL/ARF1/EPHB2/PAFAH1B1/SRCIN1	22
BP	GO:1902905	positive regulation of supramolecular fiber organization	37/1785	204/18670	0.000104101	0.00186696	0.00142191	CLIP1/PTK2B/MECP2/CCR7/SH3PXD2B/TGFBR1/SYNPO2/ACTR2/APP/RHOC/SLAIN2/ARF6/EDN1/CLASP1/ROCK2/RHOA/MAPRE1/BAG4/WHAMM/EPHA1/WNT4/MAP1B/RB1/SMAD3/PPM1F/PRKCE/ALOX15/MYO1C/NF2/RICTOR/CFL2/WASL/ARF1/VASP/NIN/SPIRE1/F2RL1	37
BP	GO:0090398	cellular senescence	19/1785	78/18670	0.000105037	0.00187813	0.00143042	CDK6/BCL2L12/HMGA2/CDKN1A/MAP3K3/RBL1/ARNTL/HMGA1/RSL1D1/PRKCD/MAP2K1/CALR/SIRT1/TP53/KRAS/AKT3/ID2/NAMPT/PAWR	19
BP	GO:0007519	skeletal muscle tissue development	31/1785	160/18670	0.000106484	0.00189171	0.00144077	CYP26B1/FOXN2/SIX4/ACTA1/FLOT1/SKI/ZBTB18/ELN/BCL9/NR2F2/BCL9L/BTG2/GPCPD1/MEF2D/ARNTL/RHOA/NLN/CCNT2/FOS/HIVEP3/CAV1/RB1/PHOX2B/DDX5/AKIRIN1/WNT3A/ATF3/CFL2/MYOCD/PRKAA1/NOTCH1	31
BP	GO:0097193	intrinsic apoptotic signaling pathway	48/1785	289/18670	0.000107025	0.00189171	0.00144077	PIK3R1/GSKIP/CYLD/BCL2L12/BCL3/TNFRSF10B/PLAGL2/ZNF385A/UBB/CDKN1A/NONO/NACC2/CASP2/DNAJA1/TMEM117/DNAJC10/TMBIM6/DDIT4/APAF1/PRKCD/HIC1/CUL3/SIRT1/TP53/FBXW7/TMEM109/PERP/SKIL/BAK1/TRIB3/CAV1/PMAIP1/UBQLN1/PPM1F/DDX5/TAF9B/HIPK1/DDX3X/SNAI2/E2F2/CHAC1/ZNF622/HIF1A/ATM/CASP3/CUL2/HYOU1/NFE2L2	48
BP	GO:0031111	negative regulation of microtubule polymerization or depolymerization	12/1785	37/18670	0.00010706	0.00189171	0.00144077	MID1IP1/TAOK1/TUBB4A/APC2/CLASP1/CAMSAP2/MAPRE1/STMN1/MAP1B/MID1/DYRK1A/CAMSAP1	12
BP	GO:0034405	response to fluid shear stress	12/1785	37/18670	0.00010706	0.00189171	0.00144077	PTK2B/HAS2/ETS1/MAP2K5/SOCS5/ADAM9/PKD1/SREBF2/MTSS1/SMAD7/NFE2L2/CITED2	12
BP	GO:1901992	positive regulation of mitotic cell cycle phase transition	21/1785	91/18670	0.000107712	0.00189763	0.00144527	MECP2/KMT2E/ESPL1/CDT1/APP/CDC25A/CCND2/PHB2/CCNE1/LSM11/CUL3/CCND1/RDX/RB1/PHOX2B/CCNB1/BRD4/DDX3X/RCC2/PLRG1/ADAM17	21
BP	GO:0043405	regulation of MAP kinase activity	54/1785	337/18670	0.000109137	0.0019171	0.0014601	PTK2B/IGF1R/MAP4K3/MAP2K5/TGFA/DUSP2/TAOK1/TGFBR1/UBE2V1/UBB/MAP3K9/SPRY1/DUSP4/MAPK1/FGF2/MAP3K3/DNAJA1/PDCD4/EDN1/TRAF6/ADAM9/DUSP14/PRKCD/MAP2K1/FZD5/EZH2/EPHA4/ADORA2B/PAK3/FRS2/KRAS/VEGFA/MAP3K2/TRIB3/PDGFB/CAV1/WNT7B/MAP3K1/CRKL/STK38/SPRED1/THBS1/PPP2CA/FLT1/PRKAA1/F2R/LYN/SPRY4/GFRAL/PTPRJ/ERBB2/EPHB2/TAB2/TLR4	54
BP	GO:0016571	histone methylation	28/1785	139/18670	0.000112474	0.00196994	0.00150035	MECP2/SETD5/SETD1B/KMT2D/BCOR/MLLT6/KMT2E/NSD1/KMT2A/SUZ12/EZH1/TET3/ARID4B/SETD1A/ASH1L/SIRT1/EZH2/CARM1/MTHFR/PRDM4/OGT/PHF19/JARID2/BRD4/PRDM2/RLF/MTF2/PYGO2	28
BP	GO:0043542	endothelial cell migration	46/1785	274/18670	0.000113866	0.00198851	0.00151449	GLUL/PTK2B/HMGB1/MECP2/CCBE1/PDPK1/ETS1/MAP2K5/PTEN/TGFBR1/PDCD6/EFNA1/ITGB1/AMOT/FGF2/NR2F2/MAP3K3/ITGB3/RAB13/EDN1/SP1/PLXND1/AMOTL1/ROCK2/RHOA/PTPRM/CALR/SIRT1/FBXW7/KDR/ADAMTS9/VEGFA/PDGFB/RHOB/CARD10/AKT3/SLIT2/SPRED1/THBS1/LOXL2/ADAM17/HIF1A/NOTCH1/NFE2L2/EPHB4/SYNJ2BP	46
BP	GO:0035883	enteroendocrine cell differentiation	10/1785	27/18670	0.00011425	0.00198941	0.00151518	PDPK1/CDK6/NKX2-2/CLOCK/RFX3/GATA6/ARNTL/NEUROD1/RFX6/SIDT2	10
BP	GO:0019886	antigen processing and presentation of exogenous peptide antigen via MHC class II	22/1785	98/18670	0.000115319	0.00199642	0.00152052	SAR1B/SEC24A/AP1S1/SH3GL2/KIF23/AP2M1/SPTBN2/CAPZA2/KIF5A/TRAF6/KIF2A/HLA-DRA/CANX/KIF3B/CAPZA1/ACTR1A/SEC23A/CAPZB/ARF1/KIF3A/DYNC1LI2/SEC24C	22
BP	GO:0048024	regulation of mRNA splicing, via spliceosome	22/1785	98/18670	0.000115319	0.00199642	0.00152052	ZBTB7A/RBFOX1/SRSF6/CELF1/MBNL2/DAZAP1/RNPS1/SREK1/MBNL1/REST/YTHDC1/WTAP/DDX5/RBFOX2/SON/SRSF2/RBM25/DYRK1A/PTBP1/NUP98/HNRNPU/SRRM4	22
BP	GO:0043434	response to peptide hormone	66/1785	436/18670	0.000116804	0.00200491	0.00152698	SOCS1/PIK3R1/SESN3/NDEL1/IGF1R/PDPK1/CYP11A1/TGFBR3/ZFP36L1/PTEN/SRSF6/EPM2AIP1/ADCY6/NR4A2/SMARCC1/SLC27A1/RAB10/KAT2B/MYO5A/NUCKS1/OSBPL8/GCNT1/BTG2/RAB13/EDN1/SP1/ROCK2/SOS1/FYN/PRKCD/IRS1/PRKAR2A/SIRT1/CREB1/MAX/TRIB3/OGT/CAV1/STXBP3/MAP1B/PDK4/IRS2/ZNF106/ATP6V0B/SESN2/ATP2B1/MYO1C/FOXO3/RAP1B/SLC2A1/ADCY9/PRKAR1A/PCK1/PRKAA1/CPEB1/BTG1/ANXA5/LYN/APPL1/LRP6/LEPROT/NFE2L2/FOXO1/CPEB2/GPR173/W…	66
BP	GO:0048864	stem cell development	20/1785	85/18670	0.000117148	0.00200491	0.00152698	PDCD6/MAPK1/FN1/EDN1/SEMA6A/SEMA4C/CORO1C/RDH10/PHOX2B/EFNB1/PHACTR4/FOLR1/KLHL12/ACVR1/SNAI2/JAG1/HIF1A/SEMA6D/PITX2/SEMA7A	20
BP	GO:0050772	positive regulation of axonogenesis	20/1785	85/18670	0.000117148	0.00200491	0.00152698	NDEL1/BDNF/TRAK1/PLXNA2/PLXNA1/FN1/GDI1/PLXND1/RHOA/MAP2K1/SKIL/VEGFA/MAP1B/WNT3A/SLIT2/PAFAH1B1/NIN/ARHGDIA/SEMA7A/NGFR	20
BP	GO:0072384	organelle transport along microtubule	20/1785	85/18670	0.000117148	0.00200491	0.00152698	SNAPIN/NDEL1/ARHGAP21/KIF5B/TRAK1/SUN2/KIF23/UBB/KIF13A/KIF5A/AP3D1/BICD2/MAP1B/KIF3B/RAB1A/ACTR1A/HIF1A/FYCO1/KIF3A/PAFAH1B1	20
BP	GO:0010970	transport along microtubule	31/1785	161/18670	0.000120012	0.00204795	0.00155976	CLUAP1/SNAPIN/NDEL1/ARHGAP21/KIF5B/SSX2IP/TRAK1/SUN2/KIF23/UBB/APP/KIF13A/KIF5A/TNPO1/RAB21/AP3D1/KIF5C/BICD2/MAP1B/PURA/KIF3B/RAB1A/ARL8B/ACTR1A/ARL8A/TTC26/HIF1A/FYCO1/KIF3A/PAFAH1B1/HNRNPU	31
BP	GO:0061136	regulation of proteasomal protein catabolic process	34/1785	183/18670	0.000120347	0.00204795	0.00155976	ARIH1/USP25/DDA1/WAC/N4BP1/SMARCC1/PSME3/UBB/SENP1/YOD1/SOCS5/AURKA/BTRC/TMTC3/USP14/PKD1/FBXW7/RAD23B/UBQLN4/TRIB3/ARIH2/OGT/CAV1/HFE/UBQLN1/SMAD7/PBK/CBFA2T3/RNF14/TMF1/PSMF1/NFE2L2/FOXF2/ATXN3	34
BP	GO:0051258	protein polymerization	47/1785	283/18670	0.000125819	0.00212707	0.00162002	CLIP1/PTK2B/MECP2/CCR7/MID1IP1/NDEL1/TWF1/TUBB4A/ACTR2/ELN/SPTBN2/CAPZA2/SLAIN2/ARF6/CLASP1/CAMSAP2/RHOA/ZNF207/PRKCD/MAPRE1/BAG4/WHAMM/STMN1/PAK3/WASF3/GBA2/RDX/PLEKHG2/MAP1B/HSP90AA1/PRKCE/CAPZA1/ALOX15/SLIT2/MYO1C/MTPN/HAX1/RICTOR/CAPZB/DYRK1A/WASL/CAMSAP1/ARF1/VASP/NIN/MAPRE3/SPIRE1	47
BP	GO:0003151	outflow tract morphogenesis	19/1785	79/18670	0.000126062	0.00212707	0.00162002	TGFBR3/ELN/JUN/GATA6/RARA/RARB/PLXND1/FZD2/VEGFA/FOLR1/CRKL/ZFPM2/JAG1/HIF1A/TGFBR2/NOTCH1/PITX2/CITED2/RBPJ	19
BP	GO:0031110	regulation of microtubule polymerization or depolymerization	19/1785	79/18670	0.000126062	0.00212707	0.00162002	CLIP1/MECP2/MID1IP1/TAOK1/TUBB4A/SLAIN2/APC2/CLASP1/MAPRE2/CAMSAP2/MAPRE1/STMN1/GBA2/MAP1B/MID1/DYRK1A/CAMSAP1/NIN/MAPRE3	19
BP	GO:0048638	regulation of developmental growth	55/1785	347/18670	0.000126932	0.00213573	0.00162662	FLVCR1/SIX4/DDX39B/NDEL1/LATS2/TGFBR3/BDNF/PIM1/CPNE5/PTEN/SH3PXD2B/CACNA2D2/SERP1/RTN4R/TGFBR1/TNKS2/CDKN1A/APP/UNC13A/DCC/MAPK1/FGF2/GATA6/BASP1/FN1/EZR/RNF157/EDN1/GDI1/SEMA6A/RAB21/SEMA4C/CREB1/CARM1/VEGFA/SMURF1/PIN1/MAP1B/JARID2/ITSN2/ZFPM2/CCNB1/STK4/WNT3A/CSF1/YY1/FSTL4/SEMA6D/TGFBR2/NOTCH1/PAFAH1B1/FXN/FGF9/SEMA7A/RBPJ	55
BP	GO:0021543	pallium development	32/1785	169/18670	0.00013048	0.00218928	0.0016674	ASCL1/NDEL1/EPHA5/CDK6/KIF5B/PTEN/SUN2/CEP120/YWHAE/RARA/EZH1/BTG2/PEX13/RHOA/NEUROD1/COL3A1/EZH2/PHLPP2/EMX2/BTBD3/IGF2BP1/SLC38A2/CRKL/WNT3A/SLIT2/SLC2A1/KDM6B/NF2/HIF1A/CASP3/LRP6/PAFAH1B1	32
BP	GO:0043409	negative regulation of MAPK cascade	34/1785	184/18670	0.000134316	0.00224325	0.00170851	IGF1R/CYLD/PTEN/DUSP2/ZMYND11/EFNA1/SPRY1/DUSP4/EZR/DNAJA1/PDCD4/DUSP14/SEMA6A/PRKCD/ASH1L/CAV1/PIN1/STK38/PBK/SPRED1/NF2/ATF3/PPP2CA/MYC/LYN/SPRY4/TIMP3/PTPRJ/EPHB2/PAFAH1B1/FOXO1/SYNJ2BP/F2RL1/TLR4	34
BP	GO:0043547	positive regulation of GTPase activity	62/1785	405/18670	0.000134921	0.00224325	0.00170851	PTK2B/CCR7/NDEL1/TAX1BP3/ARHGAP21/TBC1D2/LLGL1/GNB5/SIPA1L2/RTN4R/LIMS1/ALS2CL/CCL22/ITGB1/JUN/VAV3/APC2/AGFG1/GDI1/NUP50/MAPRE2/SOS1/EZH2/TBC1D20/TBC1D13/CORO1C/ACAP2/SNX18/PIP5K1A/ARHGAP1/CHML/DLC1/EPHA1/WNT4/PIN1/BNIP2/RAB3GAP2/RAB11FIP2/TBC1D25/CRKL/ARHGAP32/RANBP2/EVI5/ARHGAP15/PICALM/SEC23A/ARHGAP42/RCC2/RAP1GDS1/SIPA1L1/RAPGEF2/ARHGAP5/F2R/DOCK7/RGS6/ERBB2/ARHGAP12/BCR/ARHGDIA/ARFGAP2/ELMO…	62
BP	GO:0090110	COPII-coated vesicle cargo loading	7/1785	14/18670	0.000135194	0.00224325	0.00170851	SEC24A/SAR1A/TBC1D20/RAB1A/SEC23A/INSIG1/SEC24C	7
BP	GO:1902043	positive regulation of extrinsic apoptotic signaling pathway via death domain receptors	7/1785	14/18670	0.000135194	0.00224325	0.00170851	PTEN/SKIL/PMAIP1/STK4/THBS1/ATF3/TIMP3	7
BP	GO:0009895	negative regulation of catabolic process	50/1785	308/18670	0.000139253	0.00230421	0.00175493	USP25/AXIN2/FURIN/WAC/TIRAP/PABPC1/MDM4/N4BP1/SMARCC1/SENP1/EFNA1/YOD1/HNRNPA0/SNX12/LAPTM4B/PKP1/USP14/DDIT4/SMCR8/FYN/RNF41/TP53/EPHA4/SYNCRIP/UBQLN4/GRIN2A/EIF4G2/OGT/IGF2BP1/PIN1/SMAD3/GATA4/HFE/YBX1/PBK/HNRNPC/NAMPT/CBFA2T3/PRKAA1/FOXK1/ANGEL2/PSMF1/TIMP3/LRIG2/SF3B3/HNRNPU/BSCL2/TAB2/DAP/FOXK2	50
BP	GO:0060038	cardiac muscle cell proliferation	17/1785	67/18670	0.000139905	0.00230862	0.00175829	TGFBR3/PIM1/PTEN/TGFBR1/MAPK1/FGF2/GATA6/JARID2/RXRA/ZFPM2/CCNB1/SMAD1/PRKAR1A/TGFBR2/NOTCH1/FGF9/RBPJ	17
BP	GO:1901989	positive regulation of cell cycle phase transition	23/1785	106/18670	0.00014093	0.00231916	0.00176632	MECP2/KMT2E/ESPL1/CDT1/APP/CDC25A/CCND2/PHB2/CCNE1/LSM11/CUL3/EZH2/CCND1/RDX/RB1/PHOX2B/NPM1/CCNB1/BRD4/DDX3X/RCC2/PLRG1/ADAM17	23
BP	GO:0043551	regulation of phosphatidylinositol 3-kinase activity	15/1785	55/18670	0.000142669	0.00233968	0.00178194	SOCS1/PTK2B/PIK3R1/CCR7/SOCS7/ATG14/SOCS5/FGF2/VAV3/IRS1/PDGFB/SOCS6/FLT1/LYN/WDR81	15
BP	GO:0097352	autophagosome maturation	12/1785	38/18670	0.000142958	0.00233968	0.00178194	SNAPIN/GABARAPL1/ATG14/STX17/SMCR8/UBQLN4/LIX1L/UBQLN1/TBC1D25/VPS33A/VAMP8/FYCO1	12
BP	GO:0043244	regulation of protein-containing complex disassembly	24/1785	113/18670	0.000144879	0.00236464	0.00180096	MID1IP1/IGF1R/TAOK1/TWF1/SPTBN2/CAPZA2/APC2/CLASP1/CAMSAP2/SMCR8/LIMA1/UBQLN4/RDX/MAP1B/TBC1D25/CAPZA1/EIF5A2/MID1/MTPN/CFL2/CAPZB/CAMSAP1/FYCO1/F2RL1	24
BP	GO:0072089	stem cell proliferation	25/1785	120/18670	0.000147098	0.00238861	0.00181922	ASCL1/SIX3/PIM1/ZFP36L1/HMGA2/HMGB2/TRIM71/RAB10/FGF2/ZNRF3/TP53/HHIP/FRS2/VEGFA/ARIH2/WNT7B/SIX2/WNT3A/SNAI2/NF2/HIF1A/DOCK7/NOTCH1/PAFAH1B1/HNRNPU	25
BP	GO:0018210	peptidyl-threonine modification	27/1785	134/18670	0.000147145	0.00238861	0.00181922	PDPK1/CSNK1G2/CAB39/TGFBR1/CHEK1/MARK2/APP/MAPK1/ULK1/ROCK2/DDIT4/GALNT3/PRKCD/MAP2K1/GALNT1/CSNK1G3/SMAD7/WNK3/ACVR1/SPRED1/HIPK1/TBK1/CALM1/DYRK1A/TGFBR2/NLK/MAPK8	27
BP	GO:0000045	autophagosome assembly	21/1785	93/18670	0.000149675	0.00241881	0.00184221	PIP4K2A/GABARAPL1/MTMR3/ATG14/SYNPO2/STX17/ULK1/TMEM41B/SMCR8/RALB/SMURF1/RAB1B/PACS2/RAB3GAP2/RAB1A/UBQLN1/UBXN2A/ATG9A/TP53INP1/WIPI2/SH3GLB1	21
BP	GO:0032147	activation of protein kinase activity	53/1785	333/18670	0.000149936	0.00241881	0.00184221	MINK1/SOCS1/PTK2B/PDPK1/TIRAP/MAP4K3/MAP2K5/CAB39/TGFA/TNFRSF10B/TAOK1/TGFBR1/ADCY6/UBE2V1/UBB/MAP3K9/MARK2/MAPK1/FGF2/MAP3K3/OSBPL8/ITGB3/PRRC1/TRAF6/STRADB/ADAM9/PRKCD/MAP2K1/PRKAR2A/ADORA2B/PAK3/FRS2/VEGFA/MAP3K2/PDGFB/WNT7B/MAP3K1/PAK2/CRKL/CARD10/STK4/ADCY9/ZFP91/THBS1/PRKAR1A/RICTOR/PRKAA1/F2R/TGFBR2/GFRAL/CLSPN/TAB2/TLR4	53
BP	GO:0051146	striated muscle cell differentiation	48/1785	293/18670	0.000150216	0.00241881	0.00184221	CYP26B1/SIX4/ARID1A/DDX39B/ACTA1/BDNF/FLOT1/CHRNB1/SKI/TTN/SIK1/CACNA2D2/ITGB1/BCL9/GATA6/RARA/EDN1/RARB/NLN/CALR/EZH2/PTGFRN/FRS2/CSRP1/KRAS/VEGFA/LOX/DMD/PIN1/RB1/GATA4/ACVR1/RXRA/CCNB1/WNT3A/MTPN/KDM6B/PRKAR1A/YY1/CFL2/MYOCD/CSRP2/SGCD/MORF4L2/CASP3/NOTCH1/HNRNPU/RBPJ	48
BP	GO:0055024	regulation of cardiac muscle tissue development	22/1785	100/18670	0.000157768	0.00253359	0.00192964	DDX39B/TGFBR3/PIM1/PTEN/TGFBR1/MAPK1/FGF2/GATA6/EDN1/CREB1/FRS2/PIN1/JARID2/ZFPM2/CCNB1/WNT3A/YY1/MYOCD/TGFBR2/NOTCH1/FGF9/RBPJ	22
BP	GO:0042987	amyloid precursor protein catabolic process	13/1785	44/18670	0.000162698	0.00259192	0.00197406	TMED10/EFNA1/APP/UNC13A/ROCK2/EPHA4/PIN1/FKBP1A/APH1A/PICALM/DYRK1A/LYN/CASP3	13
BP	GO:0060412	ventricular septum morphogenesis	13/1785	44/18670	0.000162698	0.00259192	0.00197406	TGFBR3/TGFBR1/FGFRL1/FZD2/SMAD7/ACVR1/ZFPM2/SLIT2/ID2/TGFBR2/NOTCH1/CITED2/RBPJ	13
BP	GO:1903214	regulation of protein targeting to mitochondrion	13/1785	44/18670	0.000162698	0.00259192	0.00197406	BAP1/SREBF2/FZD5/FBXW7/SIAH3/NPEPPS/BAG4/ARIH2/HAX1/PRKAA1/SH3GLB1/SIRT4/LEPROT	13
BP	GO:0045844	positive regulation of striated muscle tissue development	20/1785	87/18670	0.000164634	0.00260888	0.00198697	CYP26B1/DDX39B/TGFBR3/PIM1/FLOT1/MAPK1/FGF2/GATA6/EDN1/ARNTL/CREB1/PIN1/ZFPM2/CCNB1/WNT3A/MYOCD/PRKAA1/NOTCH1/FGF9/RBPJ	20
BP	GO:0048636	positive regulation of muscle organ development	20/1785	87/18670	0.000164634	0.00260888	0.00198697	CYP26B1/DDX39B/TGFBR3/PIM1/FLOT1/MAPK1/FGF2/GATA6/EDN1/ARNTL/CREB1/PIN1/ZFPM2/CCNB1/WNT3A/MYOCD/PRKAA1/NOTCH1/FGF9/RBPJ	20
BP	GO:0030968	endoplasmic reticulum unfolded protein response	25/1785	121/18670	0.000168841	0.00266849	0.00203237	PIK3R1/GFPT1/HSP90B1/PARP16/KLHDC3/SERP1/CREBRF/SSR1/HDGF/YOD1/PPP1R15B/DNAJB9/TMEM33/ATF6B/CALR/CCND1/PDIA6/BAK1/CANX/EXTL3/ATF3/CTDSP2/CREB3L2/HYOU1/NFE2L2	25
BP	GO:0031113	regulation of microtubule polymerization	14/1785	50/18670	0.000173893	0.0027411	0.00208768	CLIP1/MECP2/TUBB4A/SLAIN2/CLASP1/CAMSAP2/MAPRE1/STMN1/GBA2/MAP1B/DYRK1A/CAMSAP1/NIN/MAPRE3	14
BP	GO:0055025	positive regulation of cardiac muscle tissue development	16/1785	62/18670	0.000176066	0.00276807	0.00210822	DDX39B/TGFBR3/PIM1/MAPK1/FGF2/GATA6/EDN1/CREB1/PIN1/ZFPM2/CCNB1/WNT3A/MYOCD/NOTCH1/FGF9/RBPJ	16
BP	GO:1903078	positive regulation of protein localization to plasma membrane	15/1785	56/18670	0.000177826	0.00278842	0.00212372	PIK3R1/PDPK1/KIF5B/ITGB1/EZR/ARF6/RER1/ITGA3/RAB11FIP2/WNK3/PRKCE/KCNJ11/WNT3A/SQSTM1/EPHB2	15
BP	GO:0110110	positive regulation of animal organ morphogenesis	19/1785	81/18670	0.000179479	0.002807	0.00213786	SIX4/PAX2/PIM1/SRSF6/TGFBR1/SPRY1/BASP1/EDN1/FRS2/VEGFA/WNT4/ACVR1/WNT3A/CSF1/JAG1/MYC/TGFBR2/NOTCH1/RBPJ	19
BP	GO:0061351	neural precursor cell proliferation	29/1785	150/18670	0.000181942	0.00283811	0.00216156	ASCL1/SIX3/NAP1L1/CEP120/TRIM71/RAB10/BTG2/RHOA/FZD6/TP53/HHIP/EMX2/FRS2/VEGFA/SHCBP1/GLI2/IGF2BP1/RORA/WNT3A/FOXO3/ID2/NF2/TARBP2/HIF1A/DOCK7/LYN/NOTCH1/PAFAH1B1/FOXO1	29
BP	GO:0002495	antigen processing and presentation of peptide antigen via MHC class II	22/1785	101/18670	0.000183767	0.00285913	0.00217757	SAR1B/SEC24A/AP1S1/SH3GL2/KIF23/AP2M1/SPTBN2/CAPZA2/KIF5A/TRAF6/KIF2A/HLA-DRA/CANX/KIF3B/CAPZA1/ACTR1A/SEC23A/CAPZB/ARF1/KIF3A/DYNC1LI2/SEC24C	22
BP	GO:0032868	response to insulin	45/1785	272/18670	0.000189515	0.00294092	0.00223987	SOCS1/PIK3R1/SESN3/NDEL1/IGF1R/PDPK1/ZFP36L1/PTEN/SRSF6/EPM2AIP1/SMARCC1/SLC27A1/RAB10/KAT2B/MYO5A/NUCKS1/OSBPL8/GCNT1/RAB13/SP1/SOS1/PRKCD/IRS1/SIRT1/MAX/TRIB3/OGT/STXBP3/PDK4/IRS2/ZNF106/ATP6V0B/SESN2/ATP2B1/MYO1C/FOXO3/SLC2A1/PCK1/PRKAA1/CPEB1/LYN/APPL1/FOXO1/CPEB2/WDTC1	45
BP	GO:0030178	negative regulation of Wnt signaling pathway	37/1785	210/18670	0.000191691	0.002967	0.00225972	AXIN2/NPHP3/TAX1BP3/SIX3/CTNND1/LATS2/PSMD3/CYLD/PSME3/APC2/AMER1/FZD6/HIC1/ZNRF3/CUL3/TCF7L2/NXN/TLE4/CAV1/HMGXB4/KLHL12/PSMA2/STK4/FOXO3/PSMA7/SNAI2/TBX18/KREMEN1/PSMF1/LIMD1/NOTCH1/MLLT3/NLK/LRP6/G3BP1/FOXO1/FGF9	37
BP	GO:0003206	cardiac chamber morphogenesis	26/1785	129/18670	0.000192581	0.00297309	0.00226436	TGFBR3/TGFBR1/HAND1/GATA6/RARA/NOTCH2/RARB/SOS1/FGFRL1/TP53/FZD2/UBE4B/FKBP1A/GATA4/SMAD7/ACVR1/RXRA/ZFPM2/SLIT2/ID2/JAG1/HIF1A/TGFBR2/NOTCH1/CITED2/RBPJ	26
BP	GO:1901863	positive regulation of muscle tissue development	20/1785	88/18670	0.000194181	0.00299009	0.00227731	CYP26B1/DDX39B/TGFBR3/PIM1/FLOT1/MAPK1/FGF2/GATA6/EDN1/ARNTL/CREB1/PIN1/ZFPM2/CCNB1/WNT3A/MYOCD/PRKAA1/NOTCH1/FGF9/RBPJ	20
BP	GO:1903076	regulation of protein localization to plasma membrane	21/1785	95/18670	0.000205451	0.00315417	0.00240228	PIK3R1/PDPK1/KIF5B/AP2M1/ITGB1/EZR/ARF6/GOPC/RER1/ITGA3/RAB11FIP2/WNK3/PRKCE/KCNJ11/WNT3A/PICALM/VPS4A/VAMP8/SQSTM1/APPL1/EPHB2	21
BP	GO:0008088	axo-dendritic transport	17/1785	69/18670	0.00020589	0.00315417	0.00240228	SNAPIN/NDEL1/KIF5B/TRAK1/APP/KIF5A/RAB21/AP3D1/KIF5C/PURA/KIF3B/ARL8B/ARL8A/HIF1A/KIF3A/PAFAH1B1/HNRNPU	17
BP	GO:0031503	protein-containing complex localization	46/1785	281/18670	0.000207627	0.00317266	0.00241636	RRS1/CLUAP1/KLHL21/SNAPIN/DDX39B/SRSF6/SSX2IP/CLSTN1/HIP1/SMG1/NACC2/ITGB3/EZR/KIF5A/AGFG1/RNPS1/TNFAIP2/PABPN1/NUP50/TNPO1/AP3D1/KIF5C/NUP153/RALB/YTHDC1/PURA/KIF3B/NPM1/SMAD7/RANBP2/SRSF2/RCC2/SNAP25/TTC26/WASL/CPLX1/SGCD/CACNG8/ATM/IQSEC2/KIF3A/NUP98/HNRNPU/SMG7/SYNJ2BP/NUP210	46
BP	GO:0031018	endocrine pancreas development	13/1785	45/18670	0.000208956	0.00318486	0.00242565	PDPK1/CDK6/NKX2-2/CLOCK/RFX3/GATA6/ARNTL/NEUROD1/ONECUT2/BAK1/RFX6/SIDT2/FOXO1	13
BP	GO:0048588	developmental cell growth	40/1785	234/18670	0.000209521	0.00318535	0.00242603	RARG/DDX39B/SLC9A6/NDEL1/BDNF/KMT2D/CPNE5/SH3GL2/RTN4R/ITGB1/PLXNA1/APP/UNC13A/DCC/AURKA/ULK1/FN1/RNF157/EDN1/GDI1/SEMA6A/RAB21/SEMA4C/VEGFA/SMURF1/ARIH2/PIN1/MAP1B/GATA4/ITSN2/HSP90AA1/WNT3A/SLIT2/YY1/FSTL4/SEMA6D/TGFBR2/PAFAH1B1/NIN/SEMA7A	40
BP	GO:0031571	mitotic G1 DNA damage checkpoint	16/1785	63/18670	0.00021531	0.0032466	0.00247268	MDM4/ZNF385A/CDKN1A/AURKA/CNOT6L/CASP2/BTG2/TP53/CCND1/TFDP2/CARM1/E2F7/RFWD3/CCNB1/PCNA/ATM	16
BP	GO:0044819	mitotic G1/S transition checkpoint	16/1785	63/18670	0.00021531	0.0032466	0.00247268	MDM4/ZNF385A/CDKN1A/AURKA/CNOT6L/CASP2/BTG2/TP53/CCND1/TFDP2/CARM1/E2F7/RFWD3/CCNB1/PCNA/ATM	16
BP	GO:0046622	positive regulation of organ growth	16/1785	63/18670	0.00021531	0.0032466	0.00247268	DDX39B/TGFBR3/PIM1/CACNA2D2/SERP1/MAPK1/FGF2/GATA6/BASP1/EDN1/PIN1/ZFPM2/CCNB1/NOTCH1/FGF9/RBPJ	16
BP	GO:0072655	establishment of protein localization to mitochondrion	27/1785	137/18670	0.000215717	0.0032466	0.00247268	YWHAZ/GRPEL2/BAP1/YWHAH/YWHAQ/YWHAE/TIMM17A/DNAJA1/SREBF2/FZD5/TP53/FBXW7/SIAH3/TFDP2/NPEPPS/BAG4/ARIH2/PMAIP1/HSP90AA1/DNAJC15/HAX1/PRKAA1/SH3GLB1/SIRT4/LEPROT/HSPA4/MAPK8	27
BP	GO:0033157	regulation of intracellular protein transport	42/1785	250/18670	0.000217588	0.00326655	0.00248787	PPM1A/PIK3R1/SAR1B/YWHAZ/NDEL1/KIF5B/PTPN14/BAP1/YWHAH/YOD1/MAPK1/YWHAQ/YWHAE/SAR1A/GDI1/FYN/PRKCD/TMEM30B/SREBF2/FZD5/TP53/FBXW7/SIAH3/TFDP2/NPEPPS/BAG4/TCF7L2/ARIH2/IPO5/SMAD3/PMAIP1/MYO1C/INSIG1/HAX1/PRKAA1/SH3GLB1/GCC2/ERBB2/SIRT4/LEPROT/MAPK8/ANP32B	42
BP	GO:0001954	positive regulation of cell-matrix adhesion	14/1785	51/18670	0.000218821	0.00326868	0.00248949	PTK2B/CCR7/CDK6/LIMS1/KDR/VEGFA/EPHA1/WNT4/SMAD3/PPM1F/CSF1/CD3E/PTPRJ/UTRN	14
BP	GO:0045599	negative regulation of fat cell differentiation	14/1785	51/18670	0.000218821	0.00326868	0.00248949	ZFP36L2/ZADH2/ARNTL/SIRT1/ASXL1/RUNX1T1/TRIB3/SMAD3/RORA/ZFPM2/WNT3A/INSIG1/JAG1/FOXO1	14
BP	GO:0002066	columnar/cuboidal epithelial cell development	15/1785	57/18670	0.000220245	0.00327361	0.00249325	LRTOMT/RARG/PDPK1/CDK6/NKX2-2/CLOCK/RFX3/CDKN1A/RARA/RARB/ARNTL/YIPF6/SIDT2/HIF1A/PAFAH1B1	15
BP	GO:0051055	negative regulation of lipid biosynthetic process	15/1785	57/18670	0.000220245	0.00327361	0.00249325	SIK1/SLC27A1/ORMDL2/SIRT1/FBXW7/REST/TRIB3/PDGFB/WNT4/SNAI2/INSIG1/LPCAT1/PRKAA1/ATP1A1/WDTC1	15
BP	GO:0044839	cell cycle G2/M phase transition	44/1785	266/18670	0.000222857	0.00330149	0.00251448	MECP2/ARPP19/SKP2/PSMD3/CEP135/WEE1/TAOK1/PSME3/HMGA2/CHEK1/TUBB4A/BACH1/CDKN1A/APP/AURKA/CDC25A/BTRC/YWHAE/CLASP1/TP53/CCNY/CCND1/MAPRE1/PPP1R12A/PHOX2B/PPM1D/NPM1/HSP90AA1/PSMA2/FBXL7/FOXN3/CCNB1/ACTR1A/BRD4/PSMA7/RCC2/VPS4A/HAUS3/ATM/PSMF1/CLSPN/PPP2R2A/PAFAH1B1/FBXL18	44
BP	GO:0062012	regulation of small molecule metabolic process	64/1785	429/18670	0.000223223	0.00330149	0.00251448	KPNB1/PTK2B/PDP2/MID1IP1/ARPP19/PPP1R3B/ZBTB7A/PDPR/PRKAB2/HAS2/PSMD3/ELOVL6/CPT1A/NCOA2/EPM2AIP1/SIK1/PSME3/APP/SCD/PPTC7/NUP50/SP1/DDIT4/NLN/PRKAA2/SREBF2/IRS1/SIRT1/TP53/RDH10/ADORA2B/NUP153/REST/TRIB3/PDGFB/OGT/CAV1/WNT4/PMAIP1/PSMA2/PDK4/RANBP2/IRS2/PRKCE/RORA/SESN2/PSMA7/SNAI2/INSIG1/SLC7A11/CBFA2T3/PRKAA1/HIF1A/FOXK1/MIDN/FAM3C/PSMF1/SIRT4/NUP98/FOXO1/FASN/FOXK2/NUP210/WDTC1	64
BP	GO:0035265	organ growth	36/1785	204/18670	0.000224991	0.00331946	0.00252816	FLVCR1/RARG/DDX39B/LATS2/TGFBR3/PIM1/PTEN/CACNA2D2/SERP1/TGFBR1/EVC/MAPK1/FGF2/GATA6/RARA/BASP1/EDN1/RARB/PLAG1/CARM1/PIN1/GATA4/JARID2/RXRA/ZFPM2/CCNB1/STK4/SMAD1/PRKAR1A/COCH/YY1/TGFBR2/NOTCH1/FXN/FGF9/RBPJ	36
BP	GO:0035404	histone-serine phosphorylation	6/1785	11/18670	0.000229051	0.00337105	0.00256746	RPS6KA5/HMGA2/AURKA/PRKAA2/CCNB1/PRKAA1	6
BP	GO:0000380	alternative mRNA splicing, via spliceosome	18/1785	76/18670	0.000231246	0.00339501	0.00258571	ZBTB7A/RBFOX1/SRSF6/CELF1/MBNL2/RNPS1/SREK1/MBNL1/REST/WTAP/DDX5/RBFOX2/SRSF2/RBM25/DYRK1A/PTBP1/HNRNPU/SRRM4	18
BP	GO:0042921	glucocorticoid receptor signaling pathway	7/1785	15/18670	0.000232575	0.00340617	0.00259421	ARID1A/CLOCK/YWHAH/ARNTL/CRY2/NR3C1/CALR	7
BP	GO:1905037	autophagosome organization	21/1785	96/18670	0.000239647	0.00350119	0.00266658	PIP4K2A/GABARAPL1/MTMR3/ATG14/SYNPO2/STX17/ULK1/TMEM41B/SMCR8/RALB/SMURF1/RAB1B/PACS2/RAB3GAP2/RAB1A/UBQLN1/UBXN2A/ATG9A/TP53INP1/WIPI2/SH3GLB1	21
BP	GO:0018205	peptidyl-lysine modification	60/1785	397/18670	0.0002439	0.00355465	0.0027073	HCFC1/CPA4/MECP2/SETD5/SETD1B/KMT2D/BCOR/MLLT6/CRTC2/KMT2E/CLOCK/NSD1/RPS6KA5/MSL1/CHEK1/MRGBP/SENP1/KMT2A/SET/KAT2B/SUZ12/EZH1/TET3/ARID4B/DPF1/NUP50/PRKAA2/NCOA3/SETD1A/ASH1L/SIRT1/EZH2/NUP153/YEATS4/KANSL1/CBX4/LOX/OGT/PHF19/JARID2/NAA50/KANSL1L/RANBP2/TAF9B/BRD4/PRDM2/SNAI2/RLF/DPF2/MTF2/MSL2/LOXL2/MYOCD/PRKAA1/MORF4L2/PYGO2/SIRT4/KAT6B/NUP98/NUP210	60
BP	GO:0046661	male sex differentiation	30/1785	160/18670	0.000249171	0.00362265	0.00275909	SIX4/FNDC3A/TFAP2C/HOXA10/HOXA9/TGFBR1/ACVR2A/UBB/AGO4/HMGB2/KDM5A/GATA6/RARA/ARID4B/RAB13/RHOBTB3/TBC1D20/CCND1/SF1/WNT4/CBL/GATA4/CRKL/ZFPM2/HOXD13/PLEKHA1/CSDE1/TMF1/FGF9/CITED2	30
BP	GO:0051017	actin filament bundle assembly	29/1785	153/18670	0.000259013	0.00375663	0.00286113	PTK2B/PIK3R1/SH3PXD2B/HSP90B1/TGFBR1/SYNPO2/ELN/RHOC/RND3/EZR/CLASP1/ROCK2/RHOA/MARCKS/CUL3/LIMA1/BAG4/STMN1/RDX/DLC1/EPHA1/WNT4/SMAD3/TNFAIP1/PPM1F/RHOB/NF2/PAWR/SPIRE1	29
BP	GO:0035196	production of miRNAs involved in gene silencing by miRNA	13/1785	46/18670	0.000266034	0.00384914	0.00293158	AGO1/LIN28B/PUM2/AGO4/TRIM71/DICER1/MAP2K1/TP53/SMAD3/DDX5/SMAD1/TARBP2/PUM1	13
BP	GO:1903035	negative regulation of response to wounding	20/1785	90/18670	0.000267528	0.00385015	0.00293235	PTEN/RTN4R/CDKN1A/RTN4RL1/CASK/FGF2/EDN1/TFPI/CLASP1/PROS1/PRKCD/EPHA4/PDGFB/WNT4/SMAD3/SIGLEC10/THBS1/KREMEN1/ANXA5/LRIG2	20
BP	GO:0035264	multicellular organism growth	28/1785	146/18670	0.000268032	0.00385015	0.00293235	FLVCR1/RARG/ZFP36L1/SH3PXD2B/CACNA2D2/TNKS2/APP/SPTBN2/RARA/EZR/TBL1XR1/RARB/SLC1A2/PLAG1/SOS1/TP53/SLC12A5/CREB1/RBBP6/PLEKHA1/CSF1/TARBP2/ATM/SP2/PDE4D/SLC25A25/FXN/WDTC1	28
BP	GO:0055123	digestive system development	28/1785	146/18670	0.000268032	0.00385015	0.00293235	NPHP3/ASCL1/NKX2-2/CLDN18/SALL1/MIXL1/CDKN1A/PCSK5/GATA6/RARB/PKD1/COL3A1/GLI2/RB1/SMAD3/GATA4/CRKL/SIX2/YIPF6/CCNB1/HOXD13/ID2/MYOCD/HIF1A/TGFBR2/NOTCH1/FOXF2/FGF9	28
BP	GO:0060421	positive regulation of heart growth	14/1785	52/18670	0.000273384	0.00390425	0.00297356	DDX39B/TGFBR3/PIM1/MAPK1/FGF2/GATA6/BASP1/EDN1/PIN1/ZFPM2/CCNB1/NOTCH1/FGF9/RBPJ	14
BP	GO:2000772	regulation of cellular senescence	14/1785	52/18670	0.000273384	0.00390425	0.00297356	CDK6/BCL2L12/HMGA2/MAP3K3/RBL1/ARNTL/HMGA1/RSL1D1/SIRT1/TP53/KRAS/AKT3/NAMPT/PAWR	14
BP	GO:0050679	positive regulation of epithelial cell proliferation	36/1785	206/18670	0.000273754	0.00390425	0.00297356	GLUL/HMGB1/PDPK1/B4GALT1/HAS2/PAX2/MAP2K5/NRAS/TGFA/SRSF6/TGFBR1/PDCD6/HMGB2/LAMC1/JUN/FGF2/RREB1/ITGB3/NOTCH2/SP1/SIRT1/CCND1/TCF7L2/KDR/VEGFA/PDGFB/AKT3/WNT3A/RICTOR/ADAM17/MYC/HIF1A/NOTCH1/ERBB2/ZNF703/FGF9	36
BP	GO:0043122	regulation of I-kappaB kinase/NF-kappaB signaling	40/1785	237/18670	0.000275264	0.00391647	0.00298286	PPM1A/CCR7/PDPK1/TIRAP/ZFAND6/LURAP1L/TNFRSF10B/PIM2/RIOK3/ZMYND11/UBE2V1/RHOC/BTRC/MAP3K3/SLC20A1/TRAF6/RHOA/FYN/ASH1L/SIRT1/DDX21/LITAF/TRIM5/FKBP1A/MTDH/TRIM59/OTUD7B/IRAK4/PRKCE/RORA/CXXC5/BRD4/TBK1/F2R/TNIP2/MIER1/SQSTM1/TAB2/F2RL1/TLR4	40
BP	GO:0035967	cellular response to topologically incorrect protein	30/1785	161/18670	0.000278749	0.00395665	0.00301347	PIK3R1/GFPT1/KLHL15/HSP90B1/PARP16/KLHDC3/SERP1/CREBRF/SSR1/HDGF/YOD1/PPP1R15B/DNAJB9/TMEM33/ATF6B/TMBIM6/UGGT1/CUL3/CALR/CCND1/PDIA6/BAK1/CANX/EXTL3/ATF3/CTDSP2/CREB3L2/HYOU1/NFE2L2/ATXN3	30
BP	GO:0090316	positive regulation of intracellular protein transport	32/1785	176/18670	0.000282405	0.00399153	0.00304003	PPM1A/PIK3R1/SAR1B/YWHAZ/KIF5B/BAP1/YWHAH/MAPK1/YWHAQ/YWHAE/SAR1A/FYN/PRKCD/TMEM30B/SREBF2/FZD5/TP53/FBXW7/TFDP2/NPEPPS/TCF7L2/ARIH2/IPO5/SMAD3/PMAIP1/MYO1C/PRKAA1/SH3GLB1/ERBB2/LEPROT/MAPK8/ANP32B	32
BP	GO:1902991	regulation of amyloid precursor protein catabolic process	11/1785	35/18670	0.000282539	0.00399153	0.00304003	TMED10/EFNA1/APP/UNC13A/ROCK2/EPHA4/PIN1/FKBP1A/PICALM/LYN/CASP3	11
BP	GO:0007249	I-kappaB kinase/NF-kappaB signaling	44/1785	269/18670	0.000287079	0.00404612	0.00308161	PPM1A/CCR7/PDPK1/TIRAP/ZFAND6/LURAP1L/BCL3/TNFRSF10B/NKIRAS2/PIM2/RIOK3/ZMYND11/UBE2V1/UBB/RHOC/BTRC/MAP3K3/SLC20A1/TRAF6/ROCK2/RHOA/FYN/ASH1L/SIRT1/DDX21/LITAF/TRIM5/FKBP1A/MTDH/TRIM59/OTUD7B/IRAK4/PRKCE/RORA/CXXC5/BRD4/TBK1/F2R/TNIP2/MIER1/SQSTM1/TAB2/F2RL1/TLR4	44
BP	GO:0048593	camera-type eye morphogenesis	24/1785	118/18670	0.000289498	0.00407064	0.00310028	ARID1A/SIX3/PAX2/ZEB1/SKI/LCTL/FJX1/PTPRM/FZD5/TBC1D20/FRS2/BAK1/VEGFA/PHACTR4/HIPK1/JAG1/YY1/RS1/HIF1A/PITX2/LRP6/EPHB2/FOXF2/THRB	24
BP	GO:0062197	cellular response to chemical stress	54/1785	350/18670	0.0002911	0.00408358	0.00311013	GSKIP/PAX2/SLC25A24/ETS1/CAB39/ZFP36L1/GCH1/ATP2A2/ETV5/NR4A2/OXR1/NONO/JUN/MAPK1/CAMKK2/XRCC6/DNAJA1/ARNTL/PRKAA2/FYN/PRKCD/SIRT1/TP53/EZH2/FOS/FBXW7/REST/CAV1/GATA4/UBQLN1/RHOB/SESN2/PLEKHA1/FOXO3/ALDH3B1/SLC2A1/KDM6B/DDX3X/SLC7A11/ZNF622/TP53INP1/PRKAA1/PAWR/HIF1A/PCNA/ATM/CASP3/MAPK8/NFE2L2/FOXO1/FXN/LRRC8D/CPEB2/TLR4	54
BP	GO:0060420	regulation of heart growth	19/1785	84/18670	0.000296649	0.00414721	0.0031586	DDX39B/TGFBR3/PIM1/PTEN/TGFBR1/MAPK1/FGF2/GATA6/BASP1/EDN1/PIN1/JARID2/ZFPM2/CCNB1/YY1/TGFBR2/NOTCH1/FGF9/RBPJ	19
BP	GO:0018394	peptidyl-lysine acetylation	31/1785	169/18670	0.00029702	0.00414721	0.0031586	HCFC1/CPA4/MECP2/SETD5/CRTC2/CLOCK/RPS6KA5/MSL1/CHEK1/MRGBP/KMT2A/SET/KAT2B/DPF1/PRKAA2/NCOA3/SIRT1/YEATS4/KANSL1/OGT/NAA50/KANSL1L/TAF9B/SNAI2/DPF2/MSL2/MYOCD/PRKAA1/MORF4L2/PYGO2/KAT6B	31
BP	GO:1901888	regulation of cell junction assembly	34/1785	192/18670	0.000309973	0.004318	0.00328868	SIX4/BDNF/PTEN/FLOT1/CLDN1/CLSTN1/LIMS1/APP/SLITRK4/ARF6/CLASP1/ROCK2/RHOA/FZD5/CORO1C/KDR/VEGFA/DLC1/CAV1/WNT4/SMAD3/OCLN/PPM1F/WNT3A/MYO1C/RAP1B/SNAI2/THBS1/RCC2/PTPRD/RAPGEF2/PTPRJ/EPHB2/NLGN2	34
BP	GO:0070317	negative regulation of G0 to G1 transition	12/1785	41/18670	0.000318197	0.00441203	0.00336029	CBX5/PHC3/E2F6/CHEK1/SUZ12/RNF2/APAF1/RRM2/EZH2/TFDP2/MAX/CBX3	12
BP	GO:1902893	regulation of pri-miRNA transcription by RNA polymerase II	12/1785	41/18670	0.000318197	0.00441203	0.00336029	JUN/SREBF2/NR3C1/TP53/FOS/PDGFB/SMAD3/SMAD1/NFIB/YY1/HIF1A/NGFR	12
BP	GO:0003309	type B pancreatic cell differentiation	9/1785	25/18670	0.000323026	0.00445835	0.00339557	PDPK1/CDK6/NKX2-2/CLOCK/RFX3/GATA6/ARNTL/RFX6/SIDT2	9
BP	GO:0021952	central nervous system projection neuron axonogenesis	9/1785	25/18670	0.000323026	0.00445835	0.00339557	NR4A2/DCC/EPHA4/GLI2/SLIT2/NFIB/EPHB2/PAFAH1B1/NIN	9
BP	GO:0018107	peptidyl-threonine phosphorylation	25/1785	126/18670	0.000326175	0.00446176	0.00339817	PDPK1/CSNK1G2/CAB39/TGFBR1/CHEK1/MARK2/APP/MAPK1/ULK1/ROCK2/DDIT4/PRKCD/MAP2K1/CSNK1G3/SMAD7/WNK3/ACVR1/SPRED1/HIPK1/TBK1/CALM1/DYRK1A/TGFBR2/NLK/MAPK8	25
BP	GO:0090101	negative regulation of transmembrane receptor protein serine/threonine kinase signaling pathway	25/1785	126/18670	0.000326175	0.00446176	0.00339817	PPM1A/ZBTB7A/PDPK1/TGFBR3/SKI/TGFBR1/UBB/GLG1/MTMR4/BCL9L/CHRDL1/SIRT1/TP53/ONECUT2/SKIL/SMURF1/CAV1/PIN1/SMAD3/SMAD7/ACVR1/ADAM17/TGFBR2/NOTCH1/PEG10	25
BP	GO:0055021	regulation of cardiac muscle tissue growth	18/1785	78/18670	0.000326252	0.00446176	0.00339817	DDX39B/TGFBR3/PIM1/PTEN/TGFBR1/MAPK1/FGF2/GATA6/EDN1/PIN1/JARID2/ZFPM2/CCNB1/YY1/TGFBR2/NOTCH1/FGF9/RBPJ	18
BP	GO:1903313	positive regulation of mRNA metabolic process	18/1785	78/18670	0.000326252	0.00446176	0.00339817	KHSRP/PABPC1/ZFP36L1/ZFP36L2/YTHDF3/TRIM71/CPEB3/CNOT6L/DAZAP1/BTG2/ROCK2/NUDT21/CCNB1/TNRC6A/CPEB1/NUP98/PUM1/TNRC6B	18
BP	GO:0055017	cardiac muscle tissue growth	22/1785	105/18670	0.00032947	0.0044955	0.00342386	DDX39B/TGFBR3/PIM1/PTEN/TGFBR1/MAPK1/FGF2/GATA6/EDN1/PIN1/GATA4/JARID2/RXRA/ZFPM2/CCNB1/SMAD1/PRKAR1A/YY1/TGFBR2/NOTCH1/FGF9/RBPJ	22
BP	GO:0031109	microtubule polymerization or depolymerization	23/1785	112/18670	0.000331613	0.00450422	0.00343051	CLIP1/MECP2/MID1IP1/NDEL1/TAOK1/TUBB4A/SLAIN2/APC2/CLASP1/MAPRE2/CAMSAP2/ZNF207/MAPRE1/KIF2A/STMN1/GBA2/MAP1B/MID1/CCSAP/DYRK1A/CAMSAP1/NIN/MAPRE3	23
BP	GO:0060419	heart growth	23/1785	112/18670	0.000331613	0.00450422	0.00343051	DDX39B/TGFBR3/PIM1/PTEN/TGFBR1/MAPK1/FGF2/GATA6/BASP1/EDN1/PIN1/GATA4/JARID2/RXRA/ZFPM2/CCNB1/SMAD1/PRKAR1A/YY1/TGFBR2/NOTCH1/FGF9/RBPJ	23
BP	GO:0000086	G2/M transition of mitotic cell cycle	41/1785	247/18670	0.000332754	0.0045095	0.00343453	MECP2/ARPP19/SKP2/PSMD3/CEP135/WEE1/TAOK1/PSME3/HMGA2/TUBB4A/BACH1/CDKN1A/APP/AURKA/CDC25A/BTRC/YWHAE/CLASP1/CCNY/CCND1/MAPRE1/PPP1R12A/PHOX2B/PPM1D/HSP90AA1/PSMA2/FBXL7/FOXN3/CCNB1/ACTR1A/BRD4/PSMA7/RCC2/VPS4A/HAUS3/ATM/PSMF1/CLSPN/PPP2R2A/PAFAH1B1/FBXL18	41
BP	GO:0045023	G0 to G1 transition	13/1785	47/18670	0.000335909	0.00453175	0.00345147	CBX5/PHC3/MDM4/E2F6/CHEK1/SUZ12/RNF2/APAF1/RRM2/EZH2/TFDP2/MAX/CBX3	13
BP	GO:0047496	vesicle transport along microtubule	13/1785	47/18670	0.000335909	0.00453175	0.00345147	SNAPIN/NDEL1/KIF5B/TRAK1/KIF23/KIF13A/KIF5A/AP3D1/KIF3B/RAB1A/FYCO1/KIF3A/PAFAH1B1	13
BP	GO:0007033	vacuole organization	30/1785	163/18670	0.000347409	0.00467636	0.00356161	PIP4K2A/SNAPIN/SYT7/GABARAPL1/MTMR3/RAB14/ATG14/SYNPO2/STX17/ULK1/FAM160A2/TMEM41B/LAPTM4B/SMCR8/SCARB2/RALB/SMURF1/RAB1B/PACS2/RAB3GAP2/RAB1A/UBQLN1/UBXN2A/ATG9A/TP53INP1/VPS4A/WIPI2/VPS33A/SH3GLB1/ARF1	30
BP	GO:0070585	protein localization to mitochondrion	27/1785	141/18670	0.000350591	0.00470861	0.00358617	YWHAZ/GRPEL2/BAP1/YWHAH/YWHAQ/YWHAE/TIMM17A/DNAJA1/SREBF2/FZD5/TP53/FBXW7/SIAH3/TFDP2/NPEPPS/BAG4/ARIH2/PMAIP1/HSP90AA1/DNAJC15/HAX1/PRKAA1/SH3GLB1/SIRT4/LEPROT/HSPA4/MAPK8	27
BP	GO:0016573	histone acetylation	29/1785	156/18670	0.000363801	0.00487251	0.003711	HCFC1/CPA4/MECP2/SETD5/CRTC2/CLOCK/RPS6KA5/MSL1/CHEK1/MRGBP/KMT2A/SET/KAT2B/DPF1/NCOA3/SIRT1/YEATS4/KANSL1/OGT/NAA50/KANSL1L/TAF9B/SNAI2/DPF2/MSL2/MYOCD/MORF4L2/PYGO2/KAT6B	29
BP	GO:0051216	cartilage development	36/1785	209/18670	0.000364658	0.00487251	0.003711	HOXA3/AXIN2/RARG/ZEB1/TGFBR1/HMGA2/EVC/GLG1/BMP3/HAND1/FGF2/RUNX3/RARA/MEF2D/EDN1/RARB/IMPAD1/PKD1/CARM1/GLI2/CHSY1/WNT7B/SMAD3/TRPS1/SIX2/SMAD1/SNAI2/NFIB/COCH/LOXL2/HOXC4/CREB3L2/HIF1A/TGFBR2/LRP6/FGF9	36
BP	GO:0090596	sensory organ morphogenesis	42/1785	256/18670	0.000365235	0.00487251	0.003711	CYP26B1/RARG/SIX4/ARID1A/SIX3/PAX2/ZEB1/LRIG3/SKI/SALL1/USH1G/LCTL/MAPK1/EDN1/RARB/FJX1/FZD6/PTPRM/FZD5/TBC1D20/FZD2/FRS2/BAK1/VEGFA/GLI2/PHACTR4/SIX2/OTX1/WNT3A/HIPK1/INSIG1/JAG1/YY1/RS1/HIF1A/PITX2/LRP6/EPHB2/BCR/FOXF2/FGF9/THRB	42
BP	GO:1902105	regulation of leukocyte differentiation	44/1785	272/18670	0.000367446	0.00489111	0.00372517	CYP26B1/SOCS1/HMGB1/PIK3R1/HMGB3/CYLD/CDK6/MITF/ZEB1/ZFP36L1/ZFP36L2/CLDN18/SOCS5/JUN/RUNX3/RARA/NOTCH2/TRAF6/RHOA/SOS1/RNF41/AP3D1/NFAM1/FOS/CREB1/FBXW7/GLI2/RB1/SMAD7/CCR2/TOB2/SOX13/ID2/HAX1/CSF1/ACIN1/MYC/KLF10/LYN/TGFBR2/ATP11C/ERBB2/ZC3H8/TLR4	44
BP	GO:0031958	corticosteroid receptor signaling pathway	7/1785	16/18670	0.000379408	0.00501835	0.00382208	ARID1A/CLOCK/YWHAH/ARNTL/CRY2/NR3C1/CALR	7
BP	GO:2000058	regulation of ubiquitin-dependent protein catabolic process	28/1785	149/18670	0.000379518	0.00501835	0.00382208	ARIH1/PTK2B/DDA1/WAC/N4BP1/PTEN/SMARCC1/TRIM67/SENP1/SOCS5/AURKA/USP14/FBXW7/RAD23B/UBQLN4/SMURF1/TRIB3/ARIH2/OGT/CAV1/HFE/UBQLN1/SMAD7/PBK/CBFA2T3/RNF14/NFE2L2/FOXF2	28
BP	GO:2001056	positive regulation of cysteine-type endopeptidase activity	28/1785	149/18670	0.000379518	0.00501835	0.00382208	HMGB1/TNFRSF10B/ACER2/HIP1/PDCD6/SENP1/TFAP4/CLEC7A/RHOA/FYN/APAF1/SIRT1/PERP/GRIN2A/REST/BAK1/DLC1/SMAD3/PMAIP1/PPM1F/BCL2L13/WNT3A/DDX3X/MYC/F2R/DAP/ANP32B/NGFR	28
BP	GO:1901880	negative regulation of protein depolymerization	16/1785	66/18670	0.000381819	0.00503765	0.00383678	MID1IP1/TAOK1/TWF1/SPTBN2/CAPZA2/APC2/CLASP1/CAMSAP2/LIMA1/RDX/MAP1B/CAPZA1/MID1/MTPN/CAPZB/CAMSAP1	16
BP	GO:0008064	regulation of actin polymerization or depolymerization	32/1785	179/18670	0.000385827	0.00505908	0.0038531	PTK2B/CCR7/TWF1/ACTR2/ELN/SPTBN2/CAPZA2/ARF6/RHOA/PRKCD/LIMA1/BAG4/WHAMM/PAK3/GBA2/RDX/PLEKHG2/PRKCE/CAPZA1/ALOX15/SLIT2/MYO1C/MTPN/HAX1/RICTOR/CFL2/CAPZB/WASL/ARF1/VASP/SPIRE1/F2RL1	32
BP	GO:0010821	regulation of mitochondrion organization	32/1785	179/18670	0.000385827	0.00505908	0.0038531	YWHAZ/BAP1/YWHAH/CAMKK2/YWHAQ/YWHAE/FNIP1/SLC35F6/RNF41/SREBF2/FZD5/TP53/TMEM135/FBXW7/SIAH3/TFDP2/NPEPPS/BAG4/KDR/BAK1/SMURF1/ARIH2/PMAIP1/HAX1/PRKAA1/HIF1A/SQSTM1/SH3GLB1/SIRT4/LEPROT/MAPK8/FXN	32
BP	GO:1901214	regulation of neuron death	49/1785	313/18670	0.000386707	0.00505908	0.0038531	CDC34/PTK2B/MECP2/SIX4/ASCL1/PDPK1/BDNF/EN2/UNC5B/NR4A2/UBB/OXR1/SET/NONO/DCC/JUN/CD200R1/CASP2/BTG2/RHOA/DDIT4/FYN/RRAS2/SIRT1/TP53/FOS/CREB1/FBXW7/PAK3/REST/BTBD10/KRAS/PIN1/CBL/WNT3A/PICALM/FOXO3/SLC7A11/TBK1/CSF1/HIF1A/F2R/ATM/GFRAL/CASP3/HYOU1/CHL1/STXBP1/TLR4	49
BP	GO:0009755	hormone-mediated signaling pathway	39/1785	233/18670	0.000386821	0.00505908	0.0038531	NR6A1/RARG/ARID1A/ZBTB7A/SKP2/LATS2/KMT2D/NR2C2/UFM1/CLOCK/CREBRF/NR4A2/SLC27A1/YWHAH/NR2F2/PHB2/RARA/DNAJA1/RARB/ARNTL/CCNE1/RHOA/NCOA3/CRY2/NR3C1/CALR/SIRT1/CARM1/KCTD6/RB1/PAQR7/DDX5/RXRB/RBFOX2/RORA/RXRA/RNF14/APPL1/THRB	39
BP	GO:0045930	negative regulation of mitotic cell cycle	52/1785	338/18670	0.000399993	0.00521322	0.00397049	PSMD3/CDK6/WEE1/MDM4/ZFP36L1/NME6/ZFP36L2/PTEN/ZWINT/TAOK1/SLFN11/ZNF385A/PSME3/HMGA2/CHEK1/CDKN1A/CDT1/NACC2/AURKA/CNOT6L/CASP2/BTG2/RBL1/TRIM35/ZNF207/DCUN1D3/TP53/EZH2/CCND1/TFDP2/CARM1/E2F7/RB1/SMAD3/CTDSP1/PSMA2/FBXL7/RFWD3/FOXN3/CCNB1/PSMA7/VPS4A/CDK2AP2/CTDSP2/BUB3/ANGEL2/PCNA/BTG1/ATM/CTDSPL/PSMF1/CLSPN	52
BP	GO:0099111	microtubule-based transport	33/1785	187/18670	0.000402088	0.00521322	0.00397049	CLUAP1/NPHP3/SNAPIN/NDEL1/ARHGAP21/KIF5B/SSX2IP/TRAK1/SUN2/RFX3/KIF23/UBB/APP/KIF13A/KIF5A/TNPO1/RAB21/AP3D1/KIF5C/BICD2/MAP1B/PURA/KIF3B/RAB1A/ARL8B/ACTR1A/ARL8A/TTC26/HIF1A/FYCO1/KIF3A/PAFAH1B1/HNRNPU	33
BP	GO:0051893	regulation of focal adhesion assembly	15/1785	60/18670	0.000403829	0.00521322	0.00397049	PTEN/LIMS1/CLASP1/ROCK2/RHOA/CORO1C/KDR/VEGFA/DLC1/WNT4/SMAD3/PPM1F/THBS1/RCC2/PTPRJ	15
BP	GO:0090109	regulation of cell-substrate junction assembly	15/1785	60/18670	0.000403829	0.00521322	0.00397049	PTEN/LIMS1/CLASP1/ROCK2/RHOA/CORO1C/KDR/VEGFA/DLC1/WNT4/SMAD3/PPM1F/THBS1/RCC2/PTPRJ	15
BP	GO:0090342	regulation of cell aging	15/1785	60/18670	0.000403829	0.00521322	0.00397049	CDK6/BCL2L12/PTEN/HMGA2/MAP3K3/RBL1/ARNTL/HMGA1/RSL1D1/SIRT1/TP53/KRAS/AKT3/NAMPT/PAWR	15
BP	GO:0150116	regulation of cell-substrate junction organization	15/1785	60/18670	0.000403829	0.00521322	0.00397049	PTEN/LIMS1/CLASP1/ROCK2/RHOA/CORO1C/KDR/VEGFA/DLC1/WNT4/SMAD3/PPM1F/THBS1/RCC2/PTPRJ	15
BP	GO:0061572	actin filament bundle organization	29/1785	157/18670	0.000406247	0.00522876	0.00398233	PTK2B/PIK3R1/SH3PXD2B/HSP90B1/TGFBR1/SYNPO2/ELN/RHOC/RND3/EZR/CLASP1/ROCK2/RHOA/MARCKS/CUL3/LIMA1/BAG4/STMN1/RDX/DLC1/EPHA1/WNT4/SMAD3/TNFAIP1/PPM1F/RHOB/NF2/PAWR/SPIRE1	29
BP	GO:0042149	cellular response to glucose starvation	12/1785	42/18670	0.000407116	0.00522876	0.00398233	SESN3/MTMR3/ATG14/SIK1/PRKAA2/TP53/PMAIP1/SESN2/SLC2A1/PRKAA1/SH3GLB1/NFE2L2	12
BP	GO:0048013	ephrin receptor signaling pathway	19/1785	86/18670	0.000407651	0.00522876	0.00398233	EPHA5/AP2M1/EFNA1/ACTR2/VAV3/ROCK2/RHOA/FYN/EPHA4/PAK3/EPHA1/EFNB1/APH1A/SIPA1L1/WASL/LYN/EPHB2/EPHB4/RBPJ	19
BP	GO:0010762	regulation of fibroblast migration	10/1785	31/18670	0.000420779	0.00535175	0.004076	AKAP12/FGF2/CORO1C/BAG4/PAK3/PRKCE/THBS1/RCC2/APPL1/CYGB	10
BP	GO:1902895	positive regulation of pri-miRNA transcription by RNA polymerase II	10/1785	31/18670	0.000420779	0.00535175	0.004076	JUN/SREBF2/NR3C1/TP53/FOS/PDGFB/SMAD3/SMAD1/HIF1A/NGFR	10
BP	GO:0055023	positive regulation of cardiac muscle tissue growth	13/1785	48/18670	0.000420814	0.00535175	0.004076	DDX39B/TGFBR3/PIM1/MAPK1/FGF2/GATA6/EDN1/PIN1/ZFPM2/CCNB1/NOTCH1/FGF9/RBPJ	13
BP	GO:0061014	positive regulation of mRNA catabolic process	13/1785	48/18670	0.000420814	0.00535175	0.004076	KHSRP/PABPC1/ZFP36L1/ZFP36L2/YTHDF3/TRIM71/CPEB3/CNOT6L/BTG2/ROCK2/TNRC6A/PUM1/TNRC6B	13
BP	GO:0030832	regulation of actin filament length	32/1785	180/18670	0.000427095	0.00542013	0.00412808	PTK2B/CCR7/TWF1/ACTR2/ELN/SPTBN2/CAPZA2/ARF6/RHOA/PRKCD/LIMA1/BAG4/WHAMM/PAK3/GBA2/RDX/PLEKHG2/PRKCE/CAPZA1/ALOX15/SLIT2/MYO1C/MTPN/HAX1/RICTOR/CFL2/CAPZB/WASL/ARF1/VASP/SPIRE1/F2RL1	32
BP	GO:0044262	cellular carbohydrate metabolic process	45/1785	282/18670	0.000430276	0.00544895	0.00415003	PPP1R1A/PTK2B/MECP2/ARPP19/PPP1R3B/B4GALT1/HAS2/IDH2/PYGB/NCOA2/PTEN/EPM2AIP1/SIK1/PPIP5K2/IMPAD1/DDIT4/NLN/SCARB2/IRS1/SIRT1/TP53/PHKA1/GK5/OGT/EXT1/PMAIP1/PDK4/RANBP2/SYNJ1/IRS2/PRKCE/RORA/SESN2/SLC2A1/EXTL3/CALM1/CBFA2T3/PCK1/IPPK/B4GALT5/FOXK1/MIDN/FAM3C/FOXO1/FOXK2	45
BP	GO:0008543	fibroblast growth factor receptor signaling pathway	23/1785	114/18670	0.000432965	0.00545992	0.00415839	DSTYK/RAB14/POLR2F/SHOC2/SPRY1/TRIM71/MAPK1/FGF2/HNRNPF/GALNT3/FGFRL1/HHIP/FRS2/SHCBP1/WNT4/CBL/CRKL/RBFOX2/SPRED1/THBS1/PTBP1/SPRY4/FGF9	23
BP	GO:0030218	erythrocyte differentiation	23/1785	114/18670	0.000432965	0.00545992	0.00415839	FLVCR1/ZBTB7A/ETS1/CDK6/TGFBR3/ZFP36L1/KMT2E/ACVR2A/SENP1/HMGB2/PTBP3/VEGFA/RB1/RBFOX2/FOXO3/ID2/ACIN1/HIF1A/NCAPG2/LYN/CASP3/CEBPG/PKNOX1	23
BP	GO:0032986	protein-DNA complex disassembly	8/1785	21/18670	0.000447395	0.00561823	0.00427896	ARID1A/SMARCE1/SMARCC1/SET/SMARCD1/HMGA1/SUPT16H/MYC	8
BP	GO:0043984	histone H4-K16 acetylation	8/1785	21/18670	0.000447395	0.00561823	0.00427896	HCFC1/MSL1/KMT2A/SIRT1/KANSL1/OGT/KANSL1L/MSL2	8
BP	GO:0018022	peptidyl-lysine methylation	25/1785	129/18670	0.000473045	0.00592791	0.00451482	MECP2/SETD5/SETD1B/KMT2D/BCOR/MLLT6/KMT2E/NSD1/KMT2A/SUZ12/EZH1/TET3/ARID4B/SETD1A/ASH1L/SIRT1/EZH2/OGT/PHF19/JARID2/BRD4/PRDM2/RLF/MTF2/PYGO2	25
BP	GO:0006475	internal protein amino acid acetylation	30/1785	166/18670	0.000478517	0.00598396	0.0045575	HCFC1/CPA4/MECP2/SETD5/CRTC2/CLOCK/RPS6KA5/MSL1/CHEK1/MRGBP/KMT2A/SET/KAT2B/DPF1/NCOA3/SIRT1/YEATS4/KANSL1/OGT/NAA50/KANSL1L/TAF9B/SNAI2/DPF2/MSL2/MYOCD/PCK1/MORF4L2/PYGO2/KAT6B	30
BP	GO:1905314	semi-lunar valve development	11/1785	37/18670	0.000484112	0.00604132	0.00460119	EFNA1/ELN/NOTCH2/ROCK2/RB1/GATA4/SLIT2/SNAI2/JAG1/NOTCH1/RBPJ	11
BP	GO:0010675	regulation of cellular carbohydrate metabolic process	26/1785	137/18670	0.000515691	0.00642201	0.00489113	PTK2B/ARPP19/PPP1R3B/NCOA2/EPM2AIP1/SIK1/DDIT4/NLN/SCARB2/IRS1/SIRT1/TP53/OGT/PMAIP1/PDK4/RANBP2/IRS2/PRKCE/RORA/SESN2/CBFA2T3/FOXK1/MIDN/FAM3C/FOXO1/FOXK2	26
BP	GO:0061138	morphogenesis of a branching epithelium	32/1785	182/18670	0.000521514	0.00648105	0.0049361	SIX4/PAX2/SALL1/ETV5/SPRY1/PLXNA1/BTRC/FGF2/PHB2/EDN1/PLXND1/PKD1/FZD5/HHIP/RDH10/FRS2/KRAS/VEGFA/GLI2/WNT4/SIX2/ACVR1/RXRA/STK4/SLIT2/HOXD13/SNAI2/CSF1/MYC/TGFBR2/NOTCH1/LRP6	32
BP	GO:1990090	cellular response to nerve growth factor stimulus	13/1785	49/18670	0.000523247	0.00648913	0.00494226	PDPK1/BDNF/PTEN/SH3GL2/APP/ARF6/MICALL1/CREB1/ACAP2/CBL/FOXO3/RAPGEF2/DYNC1LI2	13
BP	GO:0051028	mRNA transport	28/1785	152/18670	0.000530085	0.00655345	0.00499124	IGF2BP3/DDX39B/KHSRP/ZFP36L1/SRSF6/SMG1/AGFG1/RNPS1/PABPN1/NUP50/G3BP2/HNRNPA3/KIF5C/NUP153/YTHDC1/BICD2/IGF2BP1/RANBP2/EIF5A2/NXT2/MYO1C/AHCTF1/SRSF2/IGF2BP2/NUP98/SMG7/NUP210/PARP11	28
BP	GO:0014855	striated muscle cell proliferation	18/1785	81/18670	0.000531715	0.00655345	0.00499124	TGFBR3/PIM1/PTEN/TGFBR1/MAPK1/FGF2/GATA6/JARID2/AKIRIN1/RXRA/ZFPM2/CCNB1/SMAD1/PRKAR1A/TGFBR2/NOTCH1/FGF9/RBPJ	18
BP	GO:0021766	hippocampus development	18/1785	81/18670	0.000531715	0.00655345	0.00499124	EPHA5/CDK6/KIF5B/PTEN/YWHAE/RARA/EZH1/BTG2/NEUROD1/EZH2/PHLPP2/EMX2/CRKL/WNT3A/KDM6B/NF2/CASP3/PAFAH1B1	18
BP	GO:0072001	renal system development	46/1785	293/18670	0.000538417	0.00662242	0.00504377	CYP26B1/NPHP3/SIX4/HAS2/PAX2/TMED10/SALL1/TGFBR1/SPRY1/PCSK5/CEP55/FGF2/RARA/GCNT1/BASP1/AMER1/RARB/PKD1/APAF1/EPHA4/RDH10/EMX2/IRX2/VEGFA/GLI2/PDGFB/WNT7B/WNT4/SMAD3/PODXL/ITGA3/MTSS1/SMAD7/SIX2/APH1A/SLIT2/SMAD1/TIPARP/ID2/JAG1/TBX18/MYOCD/MYC/NOTCH1/PYGO2/COL4A4	46
BP	GO:0010594	regulation of endothelial cell migration	38/1785	229/18670	0.000542043	0.00665335	0.00506733	GLUL/PTK2B/HMGB1/MECP2/CCBE1/PDPK1/ETS1/MAP2K5/PDCD6/EFNA1/FGF2/NR2F2/MAP3K3/ITGB3/EDN1/SP1/AMOTL1/ROCK2/RHOA/PTPRM/CALR/SIRT1/FBXW7/KDR/ADAMTS9/VEGFA/PDGFB/RHOB/CARD10/AKT3/SLIT2/SPRED1/THBS1/ADAM17/HIF1A/NOTCH1/NFE2L2/SYNJ2BP	38
BP	GO:0003176	aortic valve development	10/1785	32/18670	0.000560067	0.00686053	0.00522512	EFNA1/ELN/ROCK2/RB1/GATA4/SLIT2/SNAI2/JAG1/NOTCH1/RBPJ	10
BP	GO:0045732	positive regulation of protein catabolic process	36/1785	214/18670	0.000576805	0.00705115	0.0053703	ARIH1/MYLIP/PTK2B/DDA1/FURIN/PTEN/AREL1/TRIM67/SOCS5/AURKA/WWP2/EZR/TMTC3/APC2/AMER1/ADAM9/HECW2/RNF41/FBXW7/SMURF1/RDX/TRIB3/ARIH2/CAV1/UBQLN1/HSP90AA1/SMAD7/TIPARP/CBFA2T3/LPCAT1/RNF14/SH3D19/NFE2L2/MSN/FOXO1/ATXN3	36
BP	GO:0043242	negative regulation of protein-containing complex disassembly	17/1785	75/18670	0.000590127	0.00716316	0.00545561	MID1IP1/TAOK1/TWF1/SPTBN2/CAPZA2/APC2/CLASP1/CAMSAP2/LIMA1/UBQLN4/RDX/MAP1B/CAPZA1/MID1/MTPN/CAPZB/CAMSAP1	17
BP	GO:0009743	response to carbohydrate	38/1785	230/18670	0.000590775	0.00716316	0.00545561	GLUL/PTK2B/IGF1R/PAX2/EPHA5/NKX2-2/ZFP36L1/KIF5B/PTEN/CDT1/CLEC7A/RHOA/NEUROD1/PRKAA2/TCF7L2/TXNIP/CFTR/MAP1B/GATA4/RAB11FIP2/ITGA2/IRS2/PRKCE/KCNJ11/VSNL1/SESN2/RFX6/FOXO3/RAP1B/SIDT2/THBS1/NAMPT/PCK1/PRKAA1/HIF1A/LYN/TGFBR2/CASP3	38
BP	GO:0050804	modulation of chemical synaptic transmission	63/1785	436/18670	0.000591291	0.00716316	0.00545561	GLUL/PTK2B/MECP2/SNAPIN/SYT7/BDNF/SNCG/KIF5B/PTEN/FLOT1/FBXL20/CLSTN1/ATP2A2/AKAP12/CACNA2D2/YWHAH/ITGB1/APP/UNC13A/DCC/MAPK1/CPEB3/CASK/RARA/EDN1/PPP1R9B/FYN/CREB1/EPHA4/ADORA2B/GRIN2A/KRAS/YTHDF1/MAP1B/GRIK3/NPTXR/NPTX1/CCR2/PRKCE/GRIN2D/SLC6A9/WNT3A/RIMS3/RAP1B/SLC7A11/SHISA9/SNAP25/LAMA2/SIPA1L1/RAPGEF2/F2R/CPLX1/CACNG8/SQSTM1/IQSEC2/ARF1/EPHB2/NLGN2/BCR/VAMP1/SLC24A2/CRTC1/STXBP1	63
BP	GO:0003198	epithelial to mesenchymal transition involved in endocardial cushion formation	7/1785	17/18670	0.000591948	0.00716316	0.00545561	TGFBR1/TMEM100/ACVR1/SNAI2/TGFBR2/NOTCH1/RBPJ	7
BP	GO:2000641	regulation of early endosome to late endosome transport	7/1785	17/18670	0.000591948	0.00716316	0.00545561	MAPK1/SNX12/EZR/MAP2K1/RAB21/RDX/MSN	7
BP	GO:0030183	B cell differentiation	25/1785	131/18670	0.00060057	0.00725285	0.00552392	LRRC8A/PTK2B/PIK3R1/ZBTB7A/HMGB3/CYLD/ZFP36L1/ZFP36L2/BCL3/ITGB1/DNAJB9/NOTCH2/FNIP1/NFAM1/TP53/BAK1/IRF2BP2/ID2/ADAM17/ATM/ATP11C/PTPRJ/CEBPG/TPD52/RBPJ	25
BP	GO:0030323	respiratory tube development	31/1785	176/18670	0.000612823	0.00738594	0.00562528	NPHP3/ASCL1/CCBE1/SRSF6/SPRY1/PCSK5/MAPK1/GATA6/PKD1/MAP2K1/HHIP/CREB1/FBXW7/RDH10/ASXL1/KRAS/VEGFA/GLI2/LOX/WNT7B/ITGA3/ZFPM2/PDPN/NFIB/SLC7A11/MYOCD/TGFBR2/NOTCH1/FGF9/THRB/RBPJ	31
BP	GO:0071158	positive regulation of cell cycle arrest	18/1785	82/18670	0.000621365	0.00747108	0.00569012	MDM4/ZNF385A/HMGA2/CDKN1A/AURKA/GATA6/CNOT6L/CASP2/BTG2/TP53/TFDP2/CARM1/E2F7/UHRF2/CCNB1/ID2/PCNA/ATM	18
BP	GO:0018393	internal peptidyl-lysine acetylation	29/1785	161/18670	0.000622956	0.00747108	0.00569012	HCFC1/CPA4/MECP2/SETD5/CRTC2/CLOCK/RPS6KA5/MSL1/CHEK1/MRGBP/KMT2A/SET/KAT2B/DPF1/NCOA3/SIRT1/YEATS4/KANSL1/OGT/NAA50/KANSL1L/TAF9B/SNAI2/DPF2/MSL2/MYOCD/MORF4L2/PYGO2/KAT6B	29
BP	GO:0006977	DNA damage response, signal transduction by p53 class mediator resulting in cell cycle arrest	14/1785	56/18670	0.000623665	0.00747108	0.00569012	MDM4/ZNF385A/CDKN1A/AURKA/CNOT6L/CASP2/BTG2/TP53/TFDP2/CARM1/E2F7/CCNB1/PCNA/ATM	14
BP	GO:0045785	positive regulation of cell adhesion	59/1785	403/18670	0.000624876	0.00747108	0.00569012	SOCS1/PTK2B/HMGB1/PIK3R1/CCR7/PDPK1/HAS2/ETS1/CYLD/CDK6/NFAT5/FLOT1/LIMS1/UNC13D/SOCS5/RREB1/RUNX3/RARA/VAV3/FN1/MYO10/TRAF6/RHOA/ADAM9/FYN/AP3D1/CALR/BAG4/PAK3/KDR/VEGFA/BTLA/GLI2/EPHA1/CAV1/WNT4/SMAD3/PAK2/EFNB1/PODXL/PPM1F/ITGA3/SMAD7/ITGA2/CRKL/CCR2/PRKCE/ALOX15/WNT3A/PDPN/CSF1/CD3E/ATM/LYN/TGFBR2/PTPRJ/ERBB2/UTRN/CITED2	59
BP	GO:0099177	regulation of trans-synaptic signaling	63/1785	437/18670	0.000628026	0.00749378	0.00570741	GLUL/PTK2B/MECP2/SNAPIN/SYT7/BDNF/SNCG/KIF5B/PTEN/FLOT1/FBXL20/CLSTN1/ATP2A2/AKAP12/CACNA2D2/YWHAH/ITGB1/APP/UNC13A/DCC/MAPK1/CPEB3/CASK/RARA/EDN1/PPP1R9B/FYN/CREB1/EPHA4/ADORA2B/GRIN2A/KRAS/YTHDF1/MAP1B/GRIK3/NPTXR/NPTX1/CCR2/PRKCE/GRIN2D/SLC6A9/WNT3A/RIMS3/RAP1B/SLC7A11/SHISA9/SNAP25/LAMA2/SIPA1L1/RAPGEF2/F2R/CPLX1/CACNG8/SQSTM1/IQSEC2/ARF1/EPHB2/NLGN2/BCR/VAMP1/SLC24A2/CRTC1/STXBP1	63
BP	GO:0035024	negative regulation of Rho protein signal transduction	8/1785	22/18670	0.000644484	0.00764017	0.00581891	ABL2/ITGB1/CUL3/STMN1/DLC1/TNFAIP1/ITGA3/ARHGAP42	8
BP	GO:1901522	positive regulation of transcription from RNA polymerase II promoter involved in cellular response to chemical stimulus	8/1785	22/18670	0.000644484	0.00764017	0.00581891	TP53/VEGFA/SESN2/SMAD1/HIF1A/NOTCH1/NFE2L2/RBPJ	8
BP	GO:2000773	negative regulation of cellular senescence	8/1785	22/18670	0.000644484	0.00764017	0.00581891	CDK6/BCL2L12/HMGA2/MAP3K3/RBL1/SIRT1/AKT3/NAMPT	8
BP	GO:0010718	positive regulation of epithelial to mesenchymal transition	13/1785	50/18670	0.000645993	0.00764017	0.00581891	AXIN2/TGFBR1/BCL9L/EZH2/TCF7L2/SMAD3/ACVR1/PDPN/JAG1/LOXL2/TGFBR2/NOTCH1/ZNF703	13
BP	GO:0051402	neuron apoptotic process	39/1785	239/18670	0.000646672	0.00764017	0.00581891	CDC34/PTK2B/MECP2/SIX4/ASCL1/TNFRSF21/PDPK1/BDNF/EN2/UNC5B/NR4A2/OXR1/SET/APP/NONO/JUN/CASP2/BTG2/RHOA/FYN/APAF1/TP53/FBXW7/MAX/PAK3/KRAS/PIN1/RB1/FOXO3/HIF1A/F2R/ATM/GFRAL/CASP3/HYOU1/CHL1/THRB/NGFR/STXBP1	39
BP	GO:0030307	positive regulation of cell growth	30/1785	169/18670	0.000651447	0.00768143	0.00585034	PTK2B/DDX39B/NDEL1/BDNF/MAP2K5/CPNE5/RPS6KA3/TGFBR1/UNC13A/FN1/RNF157/EDN1/GDI1/RHOA/EIF4G2/VEGFA/SMURF1/PIN1/MAP1B/ITSN2/TAF9B/WNT3A/MTPN/EXTL3/DDX3X/ADAM17/ERBB2/PAFAH1B1/FXN/SEMA7A	30
BP	GO:0043280	positive regulation of cysteine-type endopeptidase activity involved in apoptotic process	25/1785	132/18670	0.000674906	0.00792684	0.00603724	HMGB1/TNFRSF10B/ACER2/HIP1/PDCD6/SENP1/TFAP4/CLEC7A/RHOA/APAF1/SIRT1/REST/BAK1/DLC1/SMAD3/PMAIP1/PPM1F/BCL2L13/WNT3A/DDX3X/MYC/F2R/DAP/ANP32B/NGFR	25
BP	GO:0045598	regulation of fat cell differentiation	25/1785	132/18670	0.000674906	0.00792684	0.00603724	ZFP36L1/ZFP36L2/SH3PXD2B/ZNF385A/CCDC71L/ZADH2/TAF8/ARNTL/SIRT1/CREB1/CARM1/ASXL1/RUNX1T1/TRIB3/SMAD3/RORA/ZFPM2/STK4/WNT3A/SNAI2/INSIG1/ID2/JAG1/HNRNPU/FOXO1	25
BP	GO:0007623	circadian rhythm	35/1785	208/18670	0.000678953	0.00795877	0.00606156	SIX3/FBXL3/CPT1A/NCOA2/GFPT1/PTEN/SIK1/CLOCK/KMT2A/NONO/KDM5A/AHCY/JUN/BTRC/ARNTL/ROCK2/PRKAA2/CRY2/SIRT1/TP53/EZH2/CREB1/FBXW7/OGT/BTBD9/RORA/ID2/NAMPT/PRKAA1/DYRK1A/KLF10/MAPK8/HNRNPU/CRTC1/NGFR	35
BP	GO:0032869	cellular response to insulin stimulus	36/1785	216/18670	0.000688415	0.00805392	0.00613403	SOCS1/PIK3R1/SESN3/NDEL1/IGF1R/PDPK1/ZFP36L1/PTEN/SMARCC1/RAB10/KAT2B/MYO5A/NUCKS1/OSBPL8/RAB13/SP1/SOS1/PRKCD/IRS1/SIRT1/TRIB3/OGT/PDK4/IRS2/ZNF106/ATP6V0B/ATP2B1/MYO1C/FOXO3/PCK1/PRKAA1/CPEB1/APPL1/FOXO1/CPEB2/WDTC1	36
BP	GO:0030833	regulation of actin filament polymerization	29/1785	162/18670	0.000690888	0.00806709	0.00614406	PTK2B/CCR7/TWF1/ACTR2/ELN/SPTBN2/CAPZA2/ARF6/RHOA/PRKCD/BAG4/WHAMM/PAK3/GBA2/RDX/PLEKHG2/PRKCE/CAPZA1/ALOX15/SLIT2/MYO1C/MTPN/HAX1/RICTOR/CAPZB/WASL/ARF1/VASP/SPIRE1	29
BP	GO:0007369	gastrulation	32/1785	185/18670	0.000697692	0.00813069	0.0061925	NPHP3/ARID1A/PAX2/MAP2K5/ACVR2A/HMGA2/MIXL1/ITGB1/AMOT/HAND1/GATA6/ITGB3/FN1/CLASP1/RNF2/CUL3/TP53/FRS2/SMAD3/EXT1/ITGA3/ITGA2/SIX2/ACVR1/WNT3A/SMAD1/KDM6B/NF2/PRKAR1A/TGFBR2/LRP6/HSBP1	32
BP	GO:0042982	amyloid precursor protein metabolic process	15/1785	63/18670	0.000705297	0.00818746	0.00623574	TMED10/EFNA1/APP/UNC13A/ROCK2/EPHA4/PIN1/FKBP1A/APH1A/ITM2C/PICALM/PAWR/DYRK1A/LYN/CASP3	15
BP	GO:1904377	positive regulation of protein localization to cell periphery	15/1785	63/18670	0.000705297	0.00818746	0.00623574	PIK3R1/PDPK1/KIF5B/ITGB1/EZR/ARF6/RER1/ITGA3/RAB11FIP2/WNK3/PRKCE/KCNJ11/WNT3A/SQSTM1/EPHB2	15
BP	GO:0048681	negative regulation of axon regeneration	6/1785	13/18670	0.000718745	0.00832743	0.00634234	PTEN/RTN4R/RTN4RL1/EPHA4/KREMEN1/LRIG2	6
BP	GO:1901879	regulation of protein depolymerization	18/1785	83/18670	0.00072371	0.00836877	0.00637383	MID1IP1/TAOK1/TWF1/SPTBN2/CAPZA2/APC2/CLASP1/CAMSAP2/LIMA1/RDX/MAP1B/CAPZA1/MID1/MTPN/CFL2/CAPZB/CAMSAP1/F2RL1	18
BP	GO:0034620	cellular response to unfolded protein	26/1785	140/18670	0.000725264	0.00837058	0.0063752	PIK3R1/GFPT1/HSP90B1/PARP16/KLHDC3/SERP1/CREBRF/SSR1/HDGF/YOD1/PPP1R15B/DNAJB9/TMEM33/ATF6B/TMBIM6/CALR/CCND1/PDIA6/BAK1/CANX/EXTL3/ATF3/CTDSP2/CREB3L2/HYOU1/NFE2L2	26
BP	GO:2001236	regulation of extrinsic apoptotic signaling pathway	28/1785	155/18670	0.000730785	0.00841808	0.00641138	CYLD/MAP2K5/PELI3/PTEN/TNFRSF10B/UNC5B/TGFBR1/ZMYND11/PSME3/HMGB2/STRADB/FYN/TCF7L2/SKIL/CAV1/IL1A/PMAIP1/PAK2/ITM2C/ACVR1/STK4/SNAI2/THBS1/ATF3/TIMP3/GFRAL/TRAF1/ITPRIP	28
BP	GO:0036003	positive regulation of transcription from RNA polymerase II promoter in response to stress	10/1785	33/18670	0.000735402	0.00843881	0.00642717	ATF6B/TP53/HSF5/VEGFA/SESN2/ATF3/HIF1A/NOTCH1/NFE2L2/RBPJ	10
BP	GO:0045736	negative regulation of cyclin-dependent protein serine/threonine kinase activity	10/1785	33/18670	0.000735402	0.00843881	0.00642717	LATS2/PTEN/CDKN1A/KAT2B/NR2F2/TFAP4/IPO5/IPO7/MYOCD/CASP3	10
BP	GO:0010771	negative regulation of cell morphogenesis involved in differentiation	20/1785	97/18670	0.00074774	0.00854764	0.00651006	PTEN/RTN4R/EFNA1/YWHAH/DCC/GDI1/RHOA/SEMA6A/SEMA4C/CORO1C/WNT3A/SLIT2/RCC2/FSTL4/RAPGEF2/SEMA6D/EPHB2/ARHGDIA/SEMA7A/NGFR	20
BP	GO:0044773	mitotic DNA damage checkpoint	20/1785	97/18670	0.00074774	0.00854764	0.00651006	MDM4/TAOK1/ZNF385A/HMGA2/CDKN1A/AURKA/CNOT6L/CASP2/BTG2/TP53/CCND1/TFDP2/CARM1/E2F7/RFWD3/FOXN3/CCNB1/PCNA/ATM/CLSPN	20
BP	GO:0048008	platelet-derived growth factor receptor signaling pathway	14/1785	57/18670	0.000755012	0.00856538	0.00652357	PTEN/PTPN12/HIP1/TXNIP/VEGFA/LOX/PDGFB/CBL/PLEKHA1/TIPARP/MYOCD/LRIG2/PTPRJ/BCR	14
BP	GO:0060043	regulation of cardiac muscle cell proliferation	14/1785	57/18670	0.000755012	0.00856538	0.00652357	TGFBR3/PIM1/PTEN/TGFBR1/MAPK1/FGF2/GATA6/JARID2/ZFPM2/CCNB1/TGFBR2/NOTCH1/FGF9/RBPJ	14
BP	GO:0072431	signal transduction involved in mitotic G1 DNA damage checkpoint	14/1785	57/18670	0.000755012	0.00856538	0.00652357	MDM4/ZNF385A/CDKN1A/AURKA/CNOT6L/CASP2/BTG2/TP53/TFDP2/CARM1/E2F7/CCNB1/PCNA/ATM	14
BP	GO:1902400	intracellular signal transduction involved in G1 DNA damage checkpoint	14/1785	57/18670	0.000755012	0.00856538	0.00652357	MDM4/ZNF385A/CDKN1A/AURKA/CNOT6L/CASP2/BTG2/TP53/TFDP2/CARM1/E2F7/CCNB1/PCNA/ATM	14
BP	GO:0006402	mRNA catabolic process	54/1785	364/18670	0.000760279	0.00860883	0.00655666	AGO1/IGF2BP3/AXIN2/YWHAZ/TIRAP/PSMD3/KHSRP/PABPC1/ZFP36L1/ZFP36L2/YTHDF3/FXR1/SMG1/PSME3/PUM2/UBB/AGO4/TRIM71/SET/CPEB3/CNOT6L/HNRNPA0/BTG2/RNPS1/PKP1/TNPO1/ROCK2/PRKCD/SYNCRIP/FXR2/IGF2BP1/RPL30/NPM1/SAMD4B/PSMA2/DDX5/SERBP1/PNRC2/VIM/YBX1/PSMA7/HNRNPC/IGF2BP2/PPP2CA/CSDE1/TNRC6A/ANGEL2/ATM/PSMF1/PPP2R2A/HNRNPU/SMG7/PUM1/TNRC6B	54
BP	GO:0051494	negative regulation of cytoskeleton organization	27/1785	148/18670	0.000770675	0.00869368	0.00662128	MID1IP1/CCNF/TAOK1/TWF1/TUBB4A/TMEM67/KAT2B/SPTBN2/CAPZA2/APC2/CLASP1/CAMSAP2/PRKCD/LIMA1/MAPRE1/STMN1/RDX/DLC1/MAP1B/NPM1/CAPZA1/SLIT2/MID1/MTPN/CAPZB/DYRK1A/CAMSAP1	27
BP	GO:0061041	regulation of wound healing	27/1785	148/18670	0.000770675	0.00869368	0.00662128	PTEN/SRSF6/CDKN1A/CASK/FGF2/RREB1/EDN1/CLEC7A/TFPI/CLASP1/PROS1/PRKCD/PDGFB/CAV1/WNT4/SMAD3/PRKCE/PDPN/THBS1/VKORC1/F2R/ANXA5/LYN/TGFBR2/NFE2L2/F2RL1/TLR4	27
BP	GO:0071214	cellular response to abiotic stimulus	50/1785	331/18670	0.00077914	0.00875619	0.00666889	PIK3R1/ASCL1/N4BP1/CAB39/ZFP36L1/PTEN/TNFRSF10B/CLOCK/HMGA2/CHEK1/CDKN1A/NUCKS1/CDC25A/POLD3/CASP2/XRCC6/CRY2/SIRT1/TP53/TMEM109/REST/BAK1/MAP3K2/MAP3K1/SLC38A2/NPM1/RHOB/ITGA2/PBK/MTPN/SLC2A1/DDX3X/SNAI2/NAMPT/CALM1/CERS1/TP53INP1/YY1/RS1/PCK1/MYC/RAD51AP1/PCNA/ATM/CASP3/MAPK8/LRRC8D/ATP1A1/HABP4/TLR4	50
BP	GO:0104004	cellular response to environmental stimulus	50/1785	331/18670	0.00077914	0.00875619	0.00666889	PIK3R1/ASCL1/N4BP1/CAB39/ZFP36L1/PTEN/TNFRSF10B/CLOCK/HMGA2/CHEK1/CDKN1A/NUCKS1/CDC25A/POLD3/CASP2/XRCC6/CRY2/SIRT1/TP53/TMEM109/REST/BAK1/MAP3K2/MAP3K1/SLC38A2/NPM1/RHOB/ITGA2/PBK/MTPN/SLC2A1/DDX3X/SNAI2/NAMPT/CALM1/CERS1/TP53INP1/YY1/RS1/PCK1/MYC/RAD51AP1/PCNA/ATM/CASP3/MAPK8/LRRC8D/ATP1A1/HABP4/TLR4	50
BP	GO:0006342	chromatin silencing	13/1785	51/18670	0.000792131	0.00885236	0.00674214	HMGB1/MECP2/KMT2D/EZH1/HMGA1/SIRT1/EZH2/MTHFR/PPM1D/ATAD2/MIER1/MORF4L2/SIRT4	13
BP	GO:0031050	dsRNA processing	13/1785	51/18670	0.000792131	0.00885236	0.00674214	AGO1/LIN28B/PUM2/AGO4/TRIM71/DICER1/MAP2K1/TP53/SMAD3/DDX5/SMAD1/TARBP2/PUM1	13
BP	GO:0070918	production of small RNA involved in gene silencing by RNA	13/1785	51/18670	0.000792131	0.00885236	0.00674214	AGO1/LIN28B/PUM2/AGO4/TRIM71/DICER1/MAP2K1/TP53/SMAD3/DDX5/SMAD1/TARBP2/PUM1	13
BP	GO:0010761	fibroblast migration	11/1785	39/18670	0.000793769	0.00885414	0.0067435	AKAP12/FGF2/CORO1C/BAG4/PIP5K1A/PAK3/PRKCE/THBS1/RCC2/APPL1/CYGB	11
BP	GO:0070316	regulation of G0 to G1 transition	12/1785	45/18670	0.000808546	0.00899076	0.00684754	CBX5/PHC3/E2F6/CHEK1/SUZ12/RNF2/APAF1/RRM2/EZH2/TFDP2/MAX/CBX3	12
BP	GO:0009411	response to UV	26/1785	141/18670	0.000809973	0.00899076	0.00684754	PIK3R1/MAP4K3/N4BP1/BCL3/CHEK1/CDKN1A/CDC25A/POLD3/DCUN1D3/SIRT1/TP53/CCND1/UBE2B/BAK1/UBE4B/NPM1/PBK/CERS1/TP53INP1/YY1/PRKAA1/MYC/PCNA/UBE2A/CASP3/MAPK8	26
BP	GO:0009612	response to mechanical stimulus	35/1785	210/18670	0.000810519	0.00899076	0.00684754	PTK2B/ETS1/ACTA1/TNFRSF10B/TTN/STRBP/MBD2/CHEK1/JUN/CASP2/BTG2/EDN1/RHOA/PKD1/FYN/COL3A1/FOS/TXNIP/BAK1/MAP3K2/DMD/MAP1B/GATA4/MAP3K1/SLC38A2/ITGA2/CCNB1/MTPN/SLC2A1/THBS1/TGFBR2/MAPK8/ATP1A1/HABP4/TLR4	35
BP	GO:0051495	positive regulation of cytoskeleton organization	37/1785	226/18670	0.000823988	0.00910413	0.00693389	CLIP1/PTK2B/MECP2/CCR7/SH3PXD2B/TGFBR1/CEP120/SYNPO2/ACTR2/RHOC/SLAIN2/ARF6/EDN1/CLASP1/ROCK2/RHOA/MAPRE1/BAG4/WHAMM/EPHA1/WNT4/MAP1B/SMAD3/PPM1F/PRKCE/ALOX15/MYO1C/HAX1/NF2/RICTOR/CFL2/WASL/ARF1/VASP/NIN/SPIRE1/F2RL1	37
BP	GO:0001558	regulation of cell growth	60/1785	416/18670	0.00082526	0.00910413	0.00693389	PTK2B/SGK1/DDX39B/NDEL1/BDNF/MAP2K5/CAPRIN2/NME6/CPNE5/RPS6KA3/CLSTN1/BAP1/RTN4R/TGFBR1/CDKN1A/GNG4/UNC13A/DCC/FN1/PTCH2/RNF157/EDN1/GDI1/PPP1R9B/RHOA/SEMA6A/DCUN1D3/RAB21/SEMA4C/SIRT1/TP53/EIF4G2/VEGFA/SMURF1/PIN1/MAP1B/RB1/SMAD3/ITSN2/CRKL/TAF9B/SESN2/WNT3A/SLIT2/MTPN/EXTL3/DDX3X/SERTAD3/PPP2CA/YY1/MYOCD/FSTL4/ADAM17/BTG1/SEMA6D/PTPRJ/ERBB2/PAFAH1B1/FXN/SEMA7A	60
BP	GO:0030072	peptide hormone secretion	40/1785	250/18670	0.000825299	0.00910413	0.00693389	GLUL/CACNA1C/EPHA5/RASL10B/SYT7/KIF5B/CPT1A/UBE2Q1/CACNA2D2/SERP1/CLOCK/RFX3/MYO5A/EDN1/ARNTL/NEUROD1/IRS1/TCF7L2/SLC16A1/REST/CFTR/STXBP3/HFE/RAB1A/RAB11FIP2/IRS2/PRKCE/KCNJ11/VSNL1/RFX6/SLC2A1/SIDT2/AIMP1/SNAP25/HIF1A/MIDN/CPLX1/ANXA5/SIRT4/NLGN2	40
BP	GO:0003180	aortic valve morphogenesis	9/1785	28/18670	0.000838857	0.00921974	0.00702194	EFNA1/ELN/ROCK2/RB1/GATA4/SLIT2/SNAI2/JAG1/NOTCH1	9
BP	GO:0090344	negative regulation of cell aging	9/1785	28/18670	0.000838857	0.00921974	0.00702194	CDK6/BCL2L12/PTEN/HMGA2/MAP3K3/RBL1/SIRT1/AKT3/NAMPT	9
BP	GO:0030324	lung development	30/1785	172/18670	0.000876982	0.00962111	0.00732763	NPHP3/ASCL1/CCBE1/SRSF6/SPRY1/MAPK1/GATA6/PKD1/MAP2K1/HHIP/CREB1/FBXW7/RDH10/ASXL1/KRAS/VEGFA/GLI2/LOX/WNT7B/ITGA3/ZFPM2/PDPN/NFIB/SLC7A11/MYOCD/TGFBR2/NOTCH1/FGF9/THRB/RBPJ	30
BP	GO:0043620	regulation of DNA-templated transcription in response to stress	24/1785	127/18670	0.000883688	0.00965929	0.00735671	PSMD3/RPS6KA3/PSME3/UBB/CHEK1/BACH1/JUN/ATF6B/TMBIM6/TP53/HSF5/VEGFA/PSMA2/SESN2/PSMA7/ATF3/HIF1A/PSMF1/LIMD1/CUL2/NOTCH1/NFE2L2/CITED2/RBPJ	24
BP	GO:0045727	positive regulation of translation	24/1785	127/18670	0.000883688	0.00965929	0.00735671	PTK2B/DDX39B/PABPC1/BCL3/YTHDF3/FXR1/SERP1/MAPK1/CPEB3/RHOA/MRPS27/CNBP/FXR2/YTHDF1/NPM1/ITGA2/EIF5A2/RXRA/VIM/DDX3X/THBS1/TARBP2/ERBB2/HABP4	24
BP	GO:1900153	positive regulation of nuclear-transcribed mRNA catabolic process, deadenylation-dependent decay	7/1785	18/18670	0.000889108	0.00970084	0.00738835	PABPC1/ZFP36L1/ZFP36L2/CPEB3/BTG2/TNRC6A/TNRC6B	7
BP	GO:2000637	positive regulation of gene silencing by miRNA	8/1785	23/18670	0.000906003	0.0098637	0.00751239	FXR1/PUM2/TRIM71/MAP2K1/TP53/DDX5/LIMD1/PUM1	8
BP	GO:0071385	cellular response to glucocorticoid stimulus	14/1785	58/18670	0.000908975	0.0098637	0.00751239	ZFP36L1/ZFP36L2/CREBRF/FBXO32/TFAP4/EDN1/DDIT4/NR3C1/REST/ATP2B1/FOXO3/PCK1/HNRNPU/FOXO1	14
BP	GO:0098930	axonal transport	14/1785	58/18670	0.000908975	0.0098637	0.00751239	SNAPIN/NDEL1/KIF5B/TRAK1/KIF5A/RAB21/AP3D1/KIF5C/KIF3B/ARL8B/ARL8A/HIF1A/KIF3A/PAFAH1B1	14
BP	GO:0022612	gland morphogenesis	23/1785	120/18670	0.000916099	0.00992302	0.00755757	RARG/ETV5/PLXNA1/BTRC/PHB2/PLAG1/PLXND1/CUL3/FBXW7/FRS2/GLI2/CAV1/WNT4/RXRA/WNT3A/HOXD13/SNAI2/NFIB/CSF1/TGFBR2/NOTCH1/LRP6/MSN	23
BP	GO:0070371	ERK1 and ERK2 cascade	48/1785	317/18670	0.000930906	0.0100652	0.00766586	PTK2B/HMGB1/CCR7/TIRAP/DSTYK/ZFP36L1/ZFP36L2/PTEN/AKAP12/CCL22/SPRY1/APP/DUSP4/JUN/MAPK1/FGF2/PHB2/NOTCH2/FN1/EZR/SEMA6A/MAP2K1/FBXW7/FRS2/KDR/PDGFB/PIN1/GATA4/DDT/CRKL/ALOX15/RAP1B/SPRED1/ATF3/FLT1/RAPGEF2/MYC/F2R/LYN/SPRY4/TIMP3/NOTCH1/ERBB2/EPHB2/SEMA7A/SYNJ2BP/F2RL1/TLR4	48
BP	GO:0034205	amyloid-beta formation	10/1785	34/18670	0.000953527	0.0102543	0.00780986	TMED10/EFNA1/APP/ROCK2/EPHA4/PIN1/APH1A/PICALM/DYRK1A/CASP3	10
BP	GO:0043516	regulation of DNA damage response, signal transduction by p53 class mediator	10/1785	34/18670	0.000953527	0.0102543	0.00780986	ZNF385A/HIC1/SIRT1/TP53/PMAIP1/DDX5/SPRED1/SNAI2/DYRK1A/ATM	10
BP	GO:1904030	negative regulation of cyclin-dependent protein kinase activity	10/1785	34/18670	0.000953527	0.0102543	0.00780986	LATS2/PTEN/CDKN1A/KAT2B/NR2F2/TFAP4/IPO5/IPO7/MYOCD/CASP3	10
BP	GO:0046580	negative regulation of Ras protein signal transduction	13/1785	52/18670	0.000965047	0.010341	0.00787593	TRIM67/SPRY1/ABL2/ITGB1/CUL3/STMN1/DLC1/PPP2CB/TNFAIP1/ITGA3/ARHGAP42/SPRY4/EPHB2	13
BP	GO:1990089	response to nerve growth factor	13/1785	52/18670	0.000965047	0.010341	0.00787593	PDPK1/BDNF/PTEN/SH3GL2/APP/ARF6/MICALL1/CREB1/ACAP2/CBL/FOXO3/RAPGEF2/DYNC1LI2	13
BP	GO:0010595	positive regulation of endothelial cell migration	24/1785	128/18670	0.000990994	0.0106001	0.00807325	PTK2B/HMGB1/CCBE1/PDPK1/ETS1/PDCD6/FGF2/MAP3K3/ITGB3/EDN1/SP1/AMOTL1/ROCK2/CALR/SIRT1/KDR/VEGFA/PDGFB/RHOB/AKT3/THBS1/ADAM17/HIF1A/NFE2L2	24
BP	GO:0048813	dendrite morphogenesis	26/1785	143/18670	0.00100553	0.0107364	0.00817705	MINK1/CAPRIN2/PTEN/TRAK1/EFNA1/YWHAH/ITGB1/ACTR2/CAPRIN1/FBXW8/HECW2/FYN/RAB21/EPHA4/BTBD3/PAK3/RBFOX2/PICALM/PTPRD/SIPA1L1/RAPGEF2/WASL/CELSR2/EPHB2/PAFAH1B1/SRCIN1	26
BP	GO:0043491	protein kinase B signaling	42/1785	269/18670	0.00102443	0.0109188	0.00831597	PIK3R1/CCR7/SESN3/IGF1R/TRAT1/PAX2/ZFP36L1/TGFA/PTEN/HIP1/TGFBR1/PDCD6/ITGB1/FGF2/OSBPL8/FYN/RNF41/IRS1/SIRT1/MAZ/PHLPP2/BAG4/TCF7L2/FRS2/KDR/LOX/TMEM100/TRIB3/PDGFB/GATA4/HSP90AA1/MTDH/IRS2/SESN2/PLEKHA1/THBS1/HAX1/RICTOR/GFRAL/PTPRJ/ERBB2/FGF9	42
BP	GO:0010811	positive regulation of cell-substrate adhesion	23/1785	121/18670	0.00103079	0.0109475	0.00833787	PTK2B/CCR7/HAS2/CDK6/LIMS1/UNC13D/RREB1/FN1/CALR/KDR/VEGFA/EPHA1/WNT4/SMAD3/PPM1F/ITGA3/CRKL/PRKCE/ALOX15/CSF1/CD3E/PTPRJ/UTRN	23
BP	GO:0043618	regulation of transcription from RNA polymerase II promoter in response to stress	23/1785	121/18670	0.00103079	0.0109475	0.00833787	PSMD3/PSME3/UBB/CHEK1/BACH1/JUN/ATF6B/TMBIM6/TP53/HSF5/VEGFA/PSMA2/SESN2/PSMA7/ATF3/HIF1A/PSMF1/LIMD1/CUL2/NOTCH1/NFE2L2/CITED2/RBPJ	23
BP	GO:0051403	stress-activated MAPK cascade	44/1785	286/18670	0.00107297	0.0113754	0.00866371	MINK1/PTK2B/HMGB1/CCR7/IGF1R/TIRAP/MAP4K3/CYLD/ZFP36L1/TAOK1/ZMYND11/UBE2V1/UBB/MAP3K9/APP/MAPK1/BTRC/MAP3K3/EZR/DNAJA1/PDCD4/EDN1/TRAF6/MAP2K1/SEMA4C/FZD5/EPHA4/ADORA2B/VEGFA/MAP3K2/WNT7B/CRKL/IRAK4/MID1/PBK/ZNF622/MYC/TNIP2/PAFAH1B1/MAPK8/FOXO1/TAB2/F2RL1/TLR4	44
BP	GO:0072413	signal transduction involved in mitotic cell cycle checkpoint	14/1785	59/18670	0.00108853	0.0114794	0.00874297	MDM4/ZNF385A/CDKN1A/AURKA/CNOT6L/CASP2/BTG2/TP53/TFDP2/CARM1/E2F7/CCNB1/PCNA/ATM	14
BP	GO:1902402	signal transduction involved in mitotic DNA damage checkpoint	14/1785	59/18670	0.00108853	0.0114794	0.00874297	MDM4/ZNF385A/CDKN1A/AURKA/CNOT6L/CASP2/BTG2/TP53/TFDP2/CARM1/E2F7/CCNB1/PCNA/ATM	14
BP	GO:1902403	signal transduction involved in mitotic DNA integrity checkpoint	14/1785	59/18670	0.00108853	0.0114794	0.00874297	MDM4/ZNF385A/CDKN1A/AURKA/CNOT6L/CASP2/BTG2/TP53/TFDP2/CARM1/E2F7/CCNB1/PCNA/ATM	14
BP	GO:0098727	maintenance of cell number	28/1785	159/18670	0.00109982	0.0115763	0.00881672	ARID1A/ZNF706/PAX2/ZFP36L2/SKI/SALL1/POLR2F/HMGA2/FGF2/SMC1A/BCL9/BCL9L/NOTCH2/NCOA3/EZH2/REST/EPHA1/IGF2BP1/SIX2/FOXO3/JAG1/MTF2/SALL4/LOXL2/KLF10/NOTCH1/FOXO1/RBPJ	28
BP	GO:0001570	vasculogenesis	17/1785	79/18670	0.00110158	0.0115763	0.00881672	HAS2/TGFBR3/ZFP36L1/AMOT/FBXW7/KDR/VEGFA/TMEM100/CAV1/WNT7B/ZFPM2/SPRED1/TIPARP/MYOCD/RAPGEF2/TGFBR2/NOTCH1	17
BP	GO:0030098	lymphocyte differentiation	52/1785	353/18670	0.00110584	0.0116007	0.00883533	LRRC8A/CYP26B1/SOCS1/PTK2B/HMGB1/PIK3R1/CCR7/ZBTB7A/HMGB3/CYLD/CDK6/ZEB1/ZFP36L1/ZFP36L2/BCL3/ITGB1/SOCS5/RUNX3/RARA/DNAJB9/NOTCH2/FNIP1/RHOA/SOS1/RNF41/AP3D1/FZD5/NFAM1/TP53/BAK1/GLI2/WNT4/KDELR1/SMAD7/CCR2/RORA/IRF2BP2/SOX13/ID2/CD3E/ADAM17/ATM/TGFBR2/ATP11C/PTPRJ/ERBB2/CEBPG/PKNOX1/ZC3H8/TPD52/BCL11B/RBPJ	52
BP	GO:0006476	protein deacetylation	19/1785	93/18670	0.00112543	0.0117855	0.00897607	ELK4/SKI/KDM5A/NACC2/SMARCAD1/TBL1XR1/PRKAA2/SIRT1/TP53/BAZ2A/REST/VEGFA/SPRED1/PRKAA1/DYRK1A/MIER1/MORF4L2/SIRT4/MAPK8	19
BP	GO:2001234	negative regulation of apoptotic signaling pathway	37/1785	230/18670	0.00114538	0.0119735	0.00911924	BDNF/MAP2K5/BCL2L12/PELI3/TNFRSF10B/UNC5B/TGFBR1/ZMYND11/NR4A2/ZNF385A/PSME3/HMGB2/NONO/DNAJA1/MNT/TMBIM6/STRADB/FYN/SLC35F6/SIRT1/MAZ/TCF7L2/IL1A/WNT4/RB1/GATA4/ACVR1/TAF9B/DDX3X/SNAI2/THBS1/HIF1A/GFRAL/HYOU1/NFE2L2/FXN/ITPRIP	37
BP	GO:0032434	regulation of proteasomal ubiquitin-dependent protein catabolic process	23/1785	122/18670	0.00115765	0.0120597	0.00918488	ARIH1/DDA1/WAC/N4BP1/SMARCC1/SENP1/SOCS5/AURKA/USP14/RAD23B/UBQLN4/TRIB3/ARIH2/OGT/CAV1/HFE/UBQLN1/SMAD7/PBK/CBFA2T3/RNF14/NFE2L2/FOXF2	23
BP	GO:0034101	erythrocyte homeostasis	23/1785	122/18670	0.00115765	0.0120597	0.00918488	FLVCR1/ZBTB7A/ETS1/CDK6/TGFBR3/ZFP36L1/KMT2E/ACVR2A/SENP1/HMGB2/PTBP3/VEGFA/RB1/RBFOX2/FOXO3/ID2/ACIN1/HIF1A/NCAPG2/LYN/CASP3/CEBPG/PKNOX1	23
BP	GO:0001678	cellular glucose homeostasis	27/1785	152/18670	0.00116968	0.0121639	0.00926427	PIK3R1/IGF1R/PAX2/EPHA5/KIF5B/NUCKS1/NEUROD1/PRKAA2/SIRT1/CFTR/STXBP3/GATA4/RAB11FIP2/IRS2/PRKCE/KCNJ11/VSNL1/RFX6/FOXO3/SIDT2/PCK1/PRKAA1/HIF1A/FOXK1/FOXO1/FOXK2/NGFR	27
BP	GO:0045165	cell fate commitment	42/1785	271/18670	0.00118819	0.012325	0.00938696	CYP26B1/ASCL1/PAX2/CYLD/NKX2-2/MITF/SH3PXD2B/TGFBR1/ITGB1/RAB10/FGF2/GATA6/NR2F2/RARA/NOTCH2/APC2/PTCH2/RHOA/NEUROD1/TP53/TCF7L2/ONECUT2/GLI2/SOX12/WNT7B/WNT4/SIX2/RORA/ACVR1/WNT3A/SOX13/PDPN/SMAD1/KDM6B/ID2/JAG1/TBX18/DOCK7/CASP3/NOTCH1/BCL11B/RBPJ	42
BP	GO:0009314	response to radiation	63/1785	448/18670	0.00118929	0.012325	0.00938696	PIK3R1/MECP2/MAP4K3/N4BP1/FBXL3/BCL3/SIK1/CLOCK/HMGA2/CHEK1/CDKN1A/ITGB1/APP/NUCKS1/JUN/CDC25A/POLD3/SMC1A/XRCC6/SLC1A2/DCUN1D3/CRY2/SIRT1/TP53/INIP/COL3A1/FOS/CCND1/CREB1/TMEM109/GRIN2A/UBE2B/KRAS/BAK1/UBE4B/DNMT3A/CBL/PPM1D/NPM1/RHOB/RFWD3/PBK/LZIC/SNAI2/SLC7A11/ID2/NAMPT/CALM1/CERS1/TP53INP1/YY1/RS1/PRKAA1/MYC/HIF1A/ELOVL4/RAD51AP1/PCNA/ATM/UBE2A/CASP3/MAPK8/CRTC1	63
BP	GO:1904375	regulation of protein localization to cell periphery	22/1785	115/18670	0.00120154	0.0124304	0.00946728	PIK3R1/PDPK1/KIF5B/AP2M1/ITGB1/EZR/ARF6/GOPC/RER1/ITGA3/RAB11FIP2/WNK3/PRKCE/KCNJ11/WNT3A/PICALM/VPS4A/VAMP8/SQSTM1/IQSEC2/APPL1/EPHB2	22
BP	GO:0048333	mesodermal cell differentiation	10/1785	35/18670	0.00122192	0.0126099	0.00960396	PAX2/HMGA2/ITGB1/ITGB3/ITGA3/ITGA2/SIX2/WNT3A/SMAD1/KDM6B	10
BP	GO:0006401	RNA catabolic process	57/1785	397/18670	0.0012231	0.0126099	0.00960396	AGO1/IGF2BP3/AXIN2/YWHAZ/TIRAP/PSMD3/LIN28B/KHSRP/PABPC1/ZFP36L1/ZFP36L2/YTHDF3/FXR1/SMG1/PSME3/PUM2/UBB/AGO4/TRIM71/SET/CPEB3/CNOT6L/HNRNPA0/BTG2/RNPS1/PKP1/TNPO1/ROCK2/PRKCD/SYNCRIP/DNA2/FXR2/IGF2BP1/RPL30/NPM1/SAMD4B/PSMA2/DDX5/SERBP1/PNRC2/VIM/YBX1/PSMA7/HNRNPC/SIDT2/IGF2BP2/PPP2CA/CSDE1/TNRC6A/ANGEL2/ATM/PSMF1/PPP2R2A/HNRNPU/SMG7/PUM1/TNRC6B	57
BP	GO:0045646	regulation of erythrocyte differentiation	12/1785	47/18670	0.00122772	0.0126141	0.00960715	ETS1/CDK6/ZFP36L1/ACVR2A/SENP1/HMGB2/RBFOX2/FOXO3/ID2/HIF1A/NCAPG2/LYN	12
BP	GO:0070849	response to epidermal growth factor	12/1785	47/18670	0.00122772	0.0126141	0.00960715	ASCL1/PDPK1/PAX2/ZFP36L1/ZFP36L2/PTPN12/MAPK1/MCM7/BAG4/CBL/SNAI2/ERBB2	12
BP	GO:0033002	muscle cell proliferation	38/1785	239/18670	0.00123572	0.0126512	0.00963541	DDX39B/SKP2/TGFBR3/PIM1/PTEN/TGFBR1/CDKN1A/ELN/JUN/MAPK1/FOXJ2/FGF2/GATA6/MEF2D/XRCC6/PDCD4/EDN1/TRAF6/TCF7L2/SF1/PDGFB/JARID2/ITGA2/AKIRIN1/IRAK4/RXRA/ZFPM2/CCNB1/SMAD1/THBS1/ID2/NAMPT/PRKAR1A/MYOCD/TGFBR2/NOTCH1/FGF9/RBPJ	38
BP	GO:2000116	regulation of cysteine-type endopeptidase activity	38/1785	239/18670	0.00123572	0.0126512	0.00963541	HMGB1/PAX2/MAP2K5/BCL2L12/RPS6KA3/TNFRSF10B/ARL6IP1/ACER2/HIP1/PDCD6/SENP1/YWHAE/TFAP4/FNIP1/CLEC7A/RHOA/FYN/APAF1/SIRT1/PERP/GRIN2A/REST/BAK1/VEGFA/DLC1/SMAD3/PMAIP1/PAK2/PPM1F/BCL2L13/WNT3A/DDX3X/THBS1/MYC/F2R/DAP/ANP32B/NGFR	38
BP	GO:2000278	regulation of DNA biosynthetic process	21/1785	108/18670	0.00123921	0.0126512	0.00963541	PTK2B/DDX39B/TNKS2/CDKN1A/MAPK1/FGF2/RFC5/NEK7/HMBOX1/TP53/PTGES3/PAK3/PDGFB/HSP90AA1/HNRNPC/CERS1/DACH1/MYC/ATM/HNRNPU/SMG7	21
BP	GO:0006997	nucleus organization	24/1785	130/18670	0.00123977	0.0126512	0.00963541	NDEL1/ETS1/SUN2/HMGB2/ATXN7/NEK9/AGFG1/NUP153/SF1/TBPL1/SERBP1/CTDNEP1/UBXN2A/CCNB1/AHCTF1/PPP2CA/VPS4A/TMF1/PYGO2/PPP2R2A/PAFAH1B1/NUP98/HABP4/PARP11	24
BP	GO:0043281	regulation of cysteine-type endopeptidase activity involved in apoptotic process	35/1785	215/18670	0.00124191	0.0126514	0.00963558	HMGB1/PAX2/MAP2K5/BCL2L12/RPS6KA3/TNFRSF10B/ARL6IP1/ACER2/HIP1/PDCD6/SENP1/YWHAE/TFAP4/FNIP1/CLEC7A/RHOA/APAF1/SIRT1/REST/BAK1/VEGFA/DLC1/SMAD3/PMAIP1/PAK2/PPM1F/BCL2L13/WNT3A/DDX3X/THBS1/MYC/F2R/DAP/ANP32B/NGFR	35
BP	GO:0060148	positive regulation of posttranscriptional gene silencing	8/1785	24/18670	0.00124611	0.0126727	0.00965176	FXR1/PUM2/TRIM71/MAP2K1/TP53/DDX5/LIMD1/PUM1	8
BP	GO:0051302	regulation of cell division	29/1785	168/18670	0.00125144	0.0127053	0.00967663	KLHL21/TGFA/RAB11FIP4/KIF23/ZFYVE26/AURKA/KIF13A/FGF2/RBL1/MACC1/RHOA/NCOA3/CUL3/E2F7/TXNIP/VEGFA/PDGFB/IL1A/PIN1/KIF3B/PRKCE/YBX1/AHCTF1/CALM1/VPS4A/CDK2AP2/MYC/SH3GLB1/FGF9	29
BP	GO:0006337	nucleosome disassembly	7/1785	19/18670	0.00129236	0.0130544	0.00994246	ARID1A/SMARCE1/SMARCC1/SET/SMARCD1/HMGA1/SUPT16H	7
BP	GO:0060438	trachea development	7/1785	19/18670	0.00129236	0.0130544	0.00994246	RARG/MAPK1/RARA/MAP2K1/WNT7B/TGFBR2/LRP6	7
BP	GO:0072074	kidney mesenchyme development	7/1785	19/18670	0.00129236	0.0130544	0.00994246	SIX4/PAX2/BASP1/AMER1/WNT4/SIX2/MYC	7
BP	GO:0140014	mitotic nuclear division	41/1785	264/18670	0.00129615	0.0130706	0.00995481	KPNB1/RRS1/NDEL1/NME6/TGFA/KLHDC8B/PHF13/TTN/ZWINT/ESPL1/PDS5A/CDC27/KIF23/CHEK1/CDT1/AURKA/POGZ/SMC1A/PHB2/EDN1/CLASP1/PPP1R9B/RHOA/ZNF207/HECW2/CUL3/KIF2A/KNSTRN/PDGFB/IL1A/PIN1/RB1/KIF3B/NAA50/CCNB1/MKI67/CCSAP/VPS4A/BUB3/ATM/HNRNPU	41
BP	GO:0032070	regulation of deoxyribonuclease activity	5/1785	10/18670	0.00132671	0.0133339	0.0101554	HMGB1/PRKCD/SIRT1/NPM1/PCNA	5
BP	GO:1904526	regulation of microtubule binding	5/1785	10/18670	0.00132671	0.0133339	0.0101554	MARK2/MAPRE1/PPP2CB/PPP2CA/MAPRE3	5
BP	GO:0010822	positive regulation of mitochondrion organization	22/1785	116/18670	0.00135159	0.0135612	0.0103285	YWHAZ/BAP1/YWHAH/CAMKK2/YWHAQ/YWHAE/SREBF2/FZD5/TP53/FBXW7/TFDP2/NPEPPS/KDR/BAK1/SMURF1/ARIH2/PMAIP1/PRKAA1/HIF1A/SH3GLB1/LEPROT/MAPK8	22
BP	GO:0006260	DNA replication	42/1785	273/18670	0.0013745	0.013768	0.010486	CDC34/NFIC/NAP1L1/REV3L/S100A11/ORC4/PDS5A/NFIX/SLFN11/CHEK1/CDT1/SET/NUCKS1/JUN/POLD3/SMC1A/RFC5/CCNE1/HMGA1/MCM7/RRM2/TP53/FANCM/FBXW7/USP37/DNA2/E2F7/RBBP6/GLI2/PURA/TNFAIP1/RFWD3/SUPT16H/MCM4/NFIB/PPP2CA/DACH1/RAD50/PCNA/ATM/CLSPN/NUP98	42
BP	GO:0060998	regulation of dendritic spine development	16/1785	74/18670	0.00144521	0.014428	0.0109886	CAPRIN2/MAPK6/PTEN/EFNA1/ACTR2/CAPRIN1/CPEB3/ARF6/EPHA4/PAK3/C21orf91/FSTL4/SIPA1L1/ARF1/PAFAH1B1/SRCIN1	16
BP	GO:1900006	positive regulation of dendrite development	16/1785	74/18670	0.00144521	0.014428	0.0109886	CAPRIN2/MAPK6/ACTR2/CAPRIN1/CPEB3/PACSIN1/FBXW8/RAB21/EZH2/EPHA4/PAK3/PTPRD/C21orf91/ARF1/PAFAH1B1/CRTC1	16
BP	GO:0061157	mRNA destabilization	9/1785	30/18670	0.00145819	0.0145093	0.0110506	KHSRP/ZFP36L1/ZFP36L2/YTHDF3/TRIM71/CPEB3/CNOT6L/ROCK2/PUM1	9
BP	GO:1902751	positive regulation of cell cycle G2/M phase transition	9/1785	30/18670	0.00145819	0.0145093	0.0110506	MECP2/APP/CDC25A/CCND1/PHOX2B/NPM1/CCNB1/BRD4/RCC2	9
BP	GO:1903533	regulation of protein targeting	17/1785	81/18670	0.0014743	0.0146048	0.0111233	BAP1/GDI1/FYN/SREBF2/FZD5/FBXW7/SIAH3/NPEPPS/BAG4/ARIH2/MYO1C/HAX1/PRKAA1/SH3GLB1/ERBB2/SIRT4/LEPROT	17
BP	GO:0009791	post-embryonic development	18/1785	88/18670	0.00147998	0.0146048	0.0111233	MECP2/SERP1/TGFBR1/PLAGL2/IGF2R/NR4A2/MORC3/IMPAD1/ASH1L/ALDH5A1/FZD5/BAK1/VEGFA/PLEKHA1/TIPARP/ATM/PYGO2/BCL11B	18
BP	GO:0061097	regulation of protein tyrosine kinase activity	18/1785	88/18670	0.00147998	0.0146048	0.0111233	BDNF/TGFA/EFNA1/SOCS5/APP/SH3BP5/FYN/FBXW7/EPHA4/RAP2C/PDGFB/CAV1/CBL/PAK2/WNT3A/ADAM17/NCAPG2/SRCIN1	18
BP	GO:0106027	neuron projection organization	18/1785	88/18670	0.00147998	0.0146048	0.0111233	IGF1R/CAPRIN2/PTEN/EFNA1/ACTR2/APP/CAPRIN1/FYN/EPHA4/PAK3/ATP1A3/ITGA3/SIPA1L1/WASL/ARF1/EPHB2/PAFAH1B1/SRCIN1	18
BP	GO:2000177	regulation of neural precursor cell proliferation	18/1785	88/18670	0.00147998	0.0146048	0.0111233	ASCL1/SIX3/NAP1L1/TRIM71/BTG2/RHOA/TP53/VEGFA/SHCBP1/GLI2/WNT3A/FOXO3/ID2/NF2/HIF1A/LYN/NOTCH1/FOXO1	18
BP	GO:0030865	cortical cytoskeleton organization	12/1785	48/18670	0.00149668	0.0147453	0.0112303	LLGL1/KIF23/EZR/RAB13/ARF6/ROCK2/CALR/WIPF2/EPB41L1/VPS4A/WASL/PAFAH1B1	12
BP	GO:0002761	regulation of myeloid leukocyte differentiation	22/1785	117/18670	0.0015174	0.0149248	0.011367	PIK3R1/CDK6/MITF/ZFP36L1/CLDN18/JUN/RARA/NOTCH2/TRAF6/FOS/CREB1/FBXW7/RB1/TOB2/ID2/HAX1/CSF1/ACIN1/MYC/KLF10/LYN/TLR4	22
BP	GO:0090263	positive regulation of canonical Wnt signaling pathway	26/1785	147/18670	0.00152208	0.0149463	0.0113834	PPM1A/AXIN2/GSKIP/RECK/PSMD3/CSNK1G2/CAPRIN2/GPC5/PSME3/TNKS2/AMER1/TBL1XR1/ARNTL/UBE2B/CAV1/PIN1/SMAD3/CSNK1G3/PSMA2/CTDNEP1/WNT3A/PSMA7/DDX3X/PSMF1/FGF9/RBPJ	26
BP	GO:0071384	cellular response to corticosteroid stimulus	14/1785	61/18670	0.00153763	0.015029	0.0114464	ZFP36L1/ZFP36L2/CREBRF/FBXO32/TFAP4/EDN1/DDIT4/NR3C1/REST/ATP2B1/FOXO3/PCK1/HNRNPU/FOXO1	14
BP	GO:0090090	negative regulation of canonical Wnt signaling pathway	30/1785	178/18670	0.00153943	0.015029	0.0114464	AXIN2/NPHP3/CTNND1/LATS2/PSMD3/CYLD/PSME3/APC2/AMER1/FZD6/ZNRF3/CUL3/TCF7L2/TLE4/CAV1/KLHL12/PSMA2/STK4/FOXO3/PSMA7/SNAI2/TBX18/KREMEN1/PSMF1/LIMD1/NOTCH1/MLLT3/LRP6/G3BP1/FOXO1	30
BP	GO:0042177	negative regulation of protein catabolic process	24/1785	132/18670	0.00154053	0.015029	0.0114464	USP25/FURIN/WAC/MDM4/N4BP1/SMARCC1/SENP1/EFNA1/YOD1/SNX12/LAPTM4B/USP14/FYN/EPHA4/GRIN2A/OGT/PIN1/SMAD3/HFE/PBK/PSMF1/TIMP3/LRIG2/SF3B3	24
BP	GO:0055007	cardiac muscle cell differentiation	24/1785	132/18670	0.00154053	0.015029	0.0114464	ARID1A/DDX39B/TTN/SIK1/ITGB1/GATA6/RARA/EDN1/RARB/CALR/FRS2/VEGFA/PIN1/GATA4/ACVR1/RXRA/CCNB1/WNT3A/KDM6B/YY1/MYOCD/SGCD/HNRNPU/RBPJ	24
BP	GO:0060428	lung epithelium development	10/1785	36/18670	0.00154881	0.0150851	0.0114892	ASCL1/SRSF6/GATA6/PKD1/MAP2K1/CREB1/WNT7B/NFIB/THRB/RBPJ	10
BP	GO:1903707	negative regulation of hemopoiesis	27/1785	155/18670	0.00157626	0.0153276	0.0116738	SOCS1/PTK2B/HMGB1/PIK3R1/HMGB3/CDK6/ZFP36L1/CLDN18/GABPA/HOXA9/MIXL1/SOCS5/RUNX3/RARA/FBXW7/SMAD7/TOB2/ID2/DPF2/MYC/NCAPG2/LYN/NOTCH1/ERBB2/NFE2L2/ZC3H8/TLR4	27
BP	GO:0019882	antigen processing and presentation	36/1785	226/18670	0.00158145	0.0153283	0.0116743	SAR1B/CCR7/SEC24A/PSMD3/AP1S1/SH3GL2/PSME3/KIF23/AP2M1/RAB10/RAB5B/SPTBN2/CAPZA2/KIF5A/TRAF6/AP3D1/CALR/KIF2A/YTHDF1/HLA-DRA/CANX/KIF3B/HFE/PSMA2/CAPZA1/ACTR1A/SEC23A/PSMA7/THBS1/CAPZB/VAMP8/PSMF1/ARF1/KIF3A/DYNC1LI2/SEC24C	36
BP	GO:0034249	negative regulation of cellular amide metabolic process	36/1785	226/18670	0.00158145	0.0153283	0.0116743	AGO1/IGF2BP3/KHSRP/CAPRIN2/ZFP36L1/ZFP36L2/YTHDF3/FXR1/CELF1/AGO4/TRIM71/CAPRIN1/CPEB3/CNOT6L/RARA/BTG2/ROCK2/ORMDL2/CALR/SYNCRIP/FXR2/IGF2BP1/PIN1/PURA/SAMD4B/SESN2/ENC1/UNK/DDX3X/IGF2BP2/TNRC6A/PRKAA1/CPEB1/PUM1/CPEB2/TNRC6B	36
BP	GO:0045931	positive regulation of mitotic cell cycle	28/1785	163/18670	0.00162091	0.0156854	0.0119463	MECP2/TGFA/KMT2E/ESPL1/CDT1/APP/AURKA/CDC25A/CCND2/PHB2/EDN1/CCNE1/LSM11/CUL3/CCND1/RDX/PDGFB/IL1A/RB1/PHOX2B/CCNB1/BRD4/DDX3X/RCC2/PLRG1/ADAM17/PAFAH1B1/HNRNPU	28
BP	GO:0000910	cytokinesis	29/1785	171/18670	0.00165664	0.0160053	0.01219	KLHL21/RAB11FIP4/KLHDC8B/ESPL1/KIF23/ZFYVE26/CDT1/ACTR2/RHOC/AURKA/CEP55/KIF13A/ROCK2/RHOA/CUL3/E2F7/STMN1/SNX18/PIN1/KIF3B/RHOB/PRKCE/AHCTF1/SON/CALM1/VPS4A/SH3GLB1/ARF1/SPIRE1	29
BP	GO:0051052	regulation of DNA metabolic process	51/1785	351/18670	0.00165938	0.0160059	0.0121904	KPNA2/AXIN2/PTK2B/HMGB1/MECP2/DDX39B/OTUB1/KPNA1/KLHL15/MBD2/SMG1/UBE2V1/HMGA2/CHEK1/KMT2A/TNKS2/CDKN1A/CDT1/ACTR2/NUCKS1/MAPK1/FGF2/SMARCAD1/FIGN/RFC5/NEK7/APAF1/PRKCD/HMBOX1/SIRT1/TP53/PTGES3/UBQLN4/PAK3/UBE2B/PDGFB/NPM1/HSP90AA1/HNRNPC/RLF/CERS1/DACH1/RAD50/MYC/RAD51AP1/PCNA/ATM/CEBPG/HNRNPU/SMG7/SPIRE1	51
BP	GO:0007026	negative regulation of microtubule depolymerization	8/1785	25/18670	0.0016805	0.0160633	0.0122341	MID1IP1/TAOK1/APC2/CLASP1/CAMSAP2/MAP1B/MID1/CAMSAP1	8
BP	GO:0014065	phosphatidylinositol 3-kinase signaling	26/1785	148/18670	0.00168222	0.0160633	0.0122341	PIP4K2A/PIK3R1/IGF1R/ZFP36L1/PTEN/UNC5B/MAPK1/CEP55/EDN1/FYN/IRS1/SIRT1/MAZ/PIP5K1A/KDR/PDGFB/CBL/IRS2/PLEKHA1/HAX1/FLT1/F2R/LYN/ERBB2/EPOR/F2RL1	26
BP	GO:0035107	appendage morphogenesis	26/1785	148/18670	0.00168222	0.0160633	0.0122341	CYP26B1/FLVCR1/RARG/RECK/CACNA1C/HOXA10/HOXA9/SKI/SALL1/RNF165/PLXNA2/PCSK5/AFF3/RARB/IMPAD1/FZD6/MBNL1/RDH10/BAK1/TMEM231/GLI2/HOXD13/SALL4/NOTCH1/LRP6/FGF9	26
BP	GO:0035108	limb morphogenesis	26/1785	148/18670	0.00168222	0.0160633	0.0122341	CYP26B1/FLVCR1/RARG/RECK/CACNA1C/HOXA10/HOXA9/SKI/SALL1/RNF165/PLXNA2/PCSK5/AFF3/RARB/IMPAD1/FZD6/MBNL1/RDH10/BAK1/TMEM231/GLI2/HOXD13/SALL4/NOTCH1/LRP6/FGF9	26
BP	GO:0003229	ventricular cardiac muscle tissue development	13/1785	55/18670	0.0016831	0.0160633	0.0122341	TGFBR3/TGFBR1/HAND1/ADAMTS9/UBE4B/FKBP1A/SMAD7/RXRA/ZFPM2/ID2/DSG2/NOTCH1/RBPJ	13
BP	GO:0030177	positive regulation of Wnt signaling pathway	30/1785	179/18670	0.0016841	0.0160633	0.0122341	PPM1A/AXIN2/GSKIP/RECK/PSMD3/CSNK1G2/CAPRIN2/SKI/SALL1/MBD2/GPC5/PSME3/TNKS2/AMER1/TBL1XR1/ARNTL/UBE2B/CAV1/PIN1/SMAD3/CSNK1G3/PSMA2/CTDNEP1/WNT3A/PSMA7/DDX3X/PSMF1/MLLT3/FGF9/RBPJ	30
BP	GO:2001235	positive regulation of apoptotic signaling pathway	30/1785	179/18670	0.0016841	0.0160633	0.0122341	YWHAZ/CYLD/PTEN/TGFBR1/PLAGL2/UBB/YWHAH/NACC2/YWHAQ/YWHAE/TFAP4/CASP2/APAF1/PRKCD/SIRT1/TP53/FBXW7/TFDP2/SKIL/BAK1/CAV1/SMAD3/PMAIP1/PAK2/ITM2C/STK4/THBS1/ATF3/TIMP3/MAPK8	30
BP	GO:0034349	glial cell apoptotic process	6/1785	15/18670	0.0017723	0.016771	0.0127731	TNFRSF21/AKAP12/PRKCD/TP53/RB1/CASP3	6
BP	GO:0034616	response to laminar fluid shear stress	6/1785	15/18670	0.0017723	0.016771	0.0127731	ETS1/MAP2K5/ADAM9/SREBF2/SMAD7/NFE2L2	6
BP	GO:0042762	regulation of sulfur metabolic process	6/1785	15/18670	0.0017723	0.016771	0.0127731	PDP2/PDPR/SP1/PDK4/SLC7A11/NFE2L2	6
BP	GO:0043517	positive regulation of DNA damage response, signal transduction by p53 class mediator	6/1785	15/18670	0.0017723	0.016771	0.0127731	ZNF385A/HIC1/PMAIP1/DDX5/SPRED1/ATM	6
BP	GO:0070571	negative regulation of neuron projection regeneration	6/1785	15/18670	0.0017723	0.016771	0.0127731	PTEN/RTN4R/RTN4RL1/EPHA4/KREMEN1/LRIG2	6
BP	GO:0031334	positive regulation of protein-containing complex assembly	38/1785	244/18670	0.00181182	0.0170327	0.0129725	CLIP1/PTK2B/MECP2/CCR7/CDT1/ACTR2/RHOC/FNIP1/SLAIN2/ARF6/CLEC7A/CLASP1/RHOA/TP53/CREB1/MAPRE1/BAG4/WHAMM/VEGFA/MAP1B/PMAIP1/HSP90AA1/PRKCE/ALOX15/MYO1C/GTF2H1/DHX33/RICTOR/WASL/ATM/SH3GLB1/ARF1/GTF2H3/VASP/MSN/NIN/SPIRE1/TLR4	38
BP	GO:0061912	selective autophagy	12/1785	49/18670	0.00181239	0.0170327	0.0129725	ATG14/RNF41/TP53/SPTLC2/SMURF1/UBQLN1/SESN2/TBK1/WIPI2/SQSTM1/SPTLC1/WDR81	12
BP	GO:0032922	circadian regulation of gene expression	14/1785	62/18670	0.00181443	0.0170327	0.0129725	NCOA2/GFPT1/CLOCK/KMT2A/KDM5A/ARNTL/CRY2/SIRT1/OGT/RORA/ID2/NAMPT/HNRNPU/NGFR	14
BP	GO:0003323	type B pancreatic cell development	7/1785	20/18670	0.00182554	0.0170327	0.0129725	PDPK1/CDK6/NKX2-2/CLOCK/RFX3/ARNTL/SIDT2	7
BP	GO:0010002	cardioblast differentiation	7/1785	20/18670	0.00182554	0.0170327	0.0129725	GATA6/REST/GATA4/WNT3A/MYOCD/NOTCH1/RBPJ	7
BP	GO:0060216	definitive hemopoiesis	7/1785	20/18670	0.00182554	0.0170327	0.0129725	TGFBR3/ZFP36L2/HOXA9/SENP1/RBFOX2/HIPK1/BCR	7
BP	GO:0070262	peptidyl-serine dephosphorylation	7/1785	20/18670	0.00182554	0.0170327	0.0129725	PPP1R15B/YWHAE/PPTC7/PPP2CB/PPM1F/PPP2CA/PPP2R2A	7
BP	GO:1900151	regulation of nuclear-transcribed mRNA catabolic process, deadenylation-dependent decay	7/1785	20/18670	0.00182554	0.0170327	0.0129725	PABPC1/ZFP36L1/ZFP36L2/CPEB3/BTG2/TNRC6A/TNRC6B	7
BP	GO:1902993	positive regulation of amyloid precursor protein catabolic process	7/1785	20/18670	0.00182554	0.0170327	0.0129725	EFNA1/APP/ROCK2/EPHA4/PICALM/LYN/CASP3	7
BP	GO:1905330	regulation of morphogenesis of an epithelium	30/1785	180/18670	0.00184036	0.0171442	0.0130574	NPHP3/SIX4/PSMD3/PAX2/PTEN/ETV5/PSME3/AP2M1/RREB1/PHB2/CLASP1/RHOA/FZD6/ZNRF3/FZD5/FZD2/VEGFA/SMURF1/WNT4/PSMA2/SIX2/RXRA/HOXD13/PSMA7/SNAI2/CELSR3/VANGL1/CELSR2/PSMF1/MLLT3	30
BP	GO:0048592	eye morphogenesis	26/1785	149/18670	0.0018566	0.0172687	0.0131522	RARG/ARID1A/SIX3/PAX2/ZEB1/SKI/LCTL/RARB/FJX1/PTPRM/FZD5/TBC1D20/FRS2/BAK1/VEGFA/PHACTR4/HIPK1/JAG1/YY1/RS1/HIF1A/PITX2/LRP6/EPHB2/FOXF2/THRB	26
BP	GO:0001763	morphogenesis of a branching structure	32/1785	196/18670	0.0018681	0.0173487	0.0132131	SIX4/PAX2/SALL1/ETV5/SPRY1/PLXNA1/BTRC/FGF2/PHB2/EDN1/PLXND1/PKD1/FZD5/HHIP/RDH10/FRS2/KRAS/VEGFA/GLI2/WNT4/SIX2/ACVR1/RXRA/STK4/SLIT2/HOXD13/SNAI2/CSF1/MYC/TGFBR2/NOTCH1/LRP6	32
BP	GO:0070306	lens fiber cell differentiation	9/1785	31/18670	0.00188259	0.0174562	0.013295	SIX3/TBC1D20/FRS2/SKIL/WNT7B/SMAD3/VIM/SLC7A11/NF2	9
BP	GO:0050771	negative regulation of axonogenesis	15/1785	69/18670	0.0018973	0.0175654	0.0133782	PTEN/RTN4R/DCC/GDI1/RHOA/SEMA6A/SEMA4C/WNT3A/SLIT2/FSTL4/SEMA6D/EPHB2/ARHGDIA/SEMA7A/NGFR	15
BP	GO:0032392	DNA geometric change	22/1785	119/18670	0.0019016	0.0175776	0.0133875	CHD4/HMGB1/HMGB3/UBB/HMGB2/NAV2/SMARCAD1/XRCC6/RFC5/HMGA1/MCM7/TP53/DNA2/RAD23B/PURA/CHD9/MCM4/GTF2H1/DDX3X/RAD50/GTF2H3/G3BP1	22
BP	GO:0030866	cortical actin cytoskeleton organization	11/1785	43/18670	0.00190773	0.0175776	0.0133875	LLGL1/KIF23/EZR/RAB13/ARF6/ROCK2/CALR/WIPF2/EPB41L1/VPS4A/WASL	11
BP	GO:0001764	neuron migration	27/1785	157/18670	0.00191035	0.0175776	0.0133875	ASCL1/NDEL1/NAV1/NR4A2/MARK2/DCC/NR2F2/YWHAE/PEX13/DDIT4/SEMA6A/FYN/COL3A1/VEGFA/MAP1B/ZNF609/PHOX2B/ITGA3/DCX/CRKL/UNK/CELSR3/RAPGEF2/LRIG2/PAFAH1B1/CHL1/GPR173	27
BP	GO:0019827	stem cell population maintenance	27/1785	157/18670	0.00191035	0.0175776	0.0133875	ARID1A/ZNF706/PAX2/ZFP36L2/SKI/SALL1/POLR2F/HMGA2/FGF2/SMC1A/BCL9/BCL9L/NOTCH2/NCOA3/REST/EPHA1/IGF2BP1/SIX2/FOXO3/JAG1/MTF2/SALL4/LOXL2/KLF10/NOTCH1/FOXO1/RBPJ	27
BP	GO:1901342	regulation of vasculature development	59/1785	422/18670	0.00191545	0.0175974	0.0134026	AGO1/GLUL/PTK2B/MECP2/CCBE1/RECK/PDPK1/EPN1/ETS1/MAP2K5/PDCD6/HMGA2/EFNA1/ITGB1/AMOT/FOXJ2/FGF2/GATA6/MAP3K3/PDCD4/SP1/PLXND1/ROCK2/RHOA/SEMA6A/PTPRM/SIRT1/FBXW7/KDR/ADAMTS9/VEGFA/TMEM100/PDGFB/EPHA1/IL1A/WNT4/GATA4/RHOB/CARD10/MTDH/CCR2/AKT3/SPRED1/HIPK1/SMAD1/E2F2/THBS1/FLT1/MYOCD/RAPGEF2/HIF1A/BTG1/TGFBR2/NOTCH1/ERBB2/NFE2L2/FGF9/SYNJ2BP/NGFR	59
BP	GO:0031330	negative regulation of cellular catabolic process	39/1785	253/18670	0.00192379	0.0176471	0.0134404	USP25/AXIN2/FURIN/WAC/TIRAP/PABPC1/N4BP1/SMARCC1/SENP1/EFNA1/YOD1/HNRNPA0/LAPTM4B/PKP1/USP14/SMCR8/RNF41/TP53/EPHA4/SYNCRIP/UBQLN4/EIF4G2/OGT/IGF2BP1/GATA4/HFE/YBX1/PBK/HNRNPC/NAMPT/FOXK1/ANGEL2/PSMF1/TIMP3/LRIG2/HNRNPU/TAB2/DAP/FOXK2	39
BP	GO:0010717	regulation of epithelial to mesenchymal transition	18/1785	90/18670	0.0019305	0.0176815	0.0134666	AXIN2/PTEN/TGFBR1/EFNA1/BCL9L/CLASP1/EZH2/TCF7L2/SMAD3/SMAD7/ACVR1/PDPN/PPP2CA/JAG1/LOXL2/TGFBR2/NOTCH1/ZNF703	18
BP	GO:0000422	autophagy of mitochondrion	16/1785	76/18670	0.00193938	0.0176817	0.0134667	GABARAPL1/ATG14/MARK2/CAMKK2/RNF41/SREBF2/FZD5/TP53/FBXW7/SMURF1/ATG9A/HAX1/SPATA18/WIPI2/HIF1A/SQSTM1	16
BP	GO:0046785	microtubule polymerization	16/1785	76/18670	0.00193938	0.0176817	0.0134667	CLIP1/MECP2/NDEL1/TUBB4A/SLAIN2/CLASP1/CAMSAP2/ZNF207/MAPRE1/STMN1/GBA2/MAP1B/DYRK1A/CAMSAP1/NIN/MAPRE3	16
BP	GO:0061726	mitochondrion disassembly	16/1785	76/18670	0.00193938	0.0176817	0.0134667	GABARAPL1/ATG14/MARK2/CAMKK2/RNF41/SREBF2/FZD5/TP53/FBXW7/SMURF1/ATG9A/HAX1/SPATA18/WIPI2/HIF1A/SQSTM1	16
BP	GO:0038083	peptidyl-tyrosine autophosphorylation	10/1785	37/18670	0.00194314	0.0176891	0.0134724	PTK2B/IGF1R/ABL2/FYN/FRK/KDR/VEGFA/CAV1/DYRK1A/LYN	10
BP	GO:0001822	kidney development	42/1785	278/18670	0.00195616	0.0177806	0.0135421	CYP26B1/NPHP3/SIX4/HAS2/PAX2/TMED10/SALL1/TGFBR1/SPRY1/PCSK5/FGF2/RARA/GCNT1/BASP1/AMER1/RARB/PKD1/APAF1/EPHA4/RDH10/IRX2/VEGFA/GLI2/PDGFB/WNT7B/WNT4/SMAD3/PODXL/ITGA3/MTSS1/SMAD7/SIX2/APH1A/SLIT2/SMAD1/TIPARP/ID2/JAG1/MYC/NOTCH1/PYGO2/COL4A4	42
BP	GO:0010906	regulation of glucose metabolic process	21/1785	112/18670	0.00199019	0.0180625	0.0137568	ARPP19/PPP1R3B/NCOA2/EPM2AIP1/SIK1/NLN/IRS1/SIRT1/TP53/OGT/PMAIP1/PDK4/RANBP2/IRS2/RORA/SESN2/FOXK1/MIDN/FAM3C/FOXO1/FOXK2	21
BP	GO:0048754	branching morphogenesis of an epithelial tube	26/1785	150/18670	0.00204625	0.0185431	0.0141228	SIX4/PAX2/SALL1/ETV5/SPRY1/BTRC/FGF2/PHB2/EDN1/PLXND1/PKD1/HHIP/RDH10/KRAS/VEGFA/GLI2/WNT4/SIX2/ACVR1/STK4/SLIT2/CSF1/MYC/TGFBR2/NOTCH1/LRP6	26
BP	GO:0007009	plasma membrane organization	20/1785	105/18670	0.00207133	0.0187421	0.0142743	SYT7/PTEN/FLOT1/SH3GL2/ATP2A2/SERP1/MPP5/PACSIN1/XKR7/MICALL1/PRKCD/WHAMM/CAV1/PLEKHM2/MTSS1/WASL/TLCD2/SH3GLB1/PLSCR4/OSBPL2	20
BP	GO:0007498	mesoderm development	24/1785	135/18670	0.00210798	0.0189877	0.0144614	PAX2/ZFP36L1/ACVR2A/HMGA2/MIXL1/ITGB1/HAND1/ITGB3/VEGFA/SMAD3/EXT1/ITGA3/ITGA2/SIX2/ACVR1/CTDNEP1/ZFPM2/WNT3A/SMAD1/KDM6B/NF2/PRKAR1A/PPP2CA/CITED2	24
BP	GO:1903825	organic acid transmembrane transport	24/1785	135/18670	0.00210798	0.0189877	0.0144614	LRRC8A/SLC7A5/MID1IP1/PRKAB2/SLC5A6/CPT1A/ARL6IP1/SLC1A2/PRKAA2/SLC6A8/SLC16A1/SLC38A2/FOLR1/SLC1A5/IRS2/SLC6A9/SLC25A32/PDPN/SLC7A2/THBS1/SLC7A11/SLC38A7/SLC3A2/LRRC8D	24
BP	GO:1905039	carboxylic acid transmembrane transport	24/1785	135/18670	0.00210798	0.0189877	0.0144614	LRRC8A/SLC7A5/MID1IP1/PRKAB2/SLC5A6/CPT1A/ARL6IP1/SLC1A2/PRKAA2/SLC6A8/SLC16A1/SLC38A2/FOLR1/SLC1A5/IRS2/SLC6A9/SLC25A32/PDPN/SLC7A2/THBS1/SLC7A11/SLC38A7/SLC3A2/LRRC8D	24
BP	GO:0098739	import across plasma membrane	22/1785	120/18670	0.00212284	0.0190928	0.0145414	SLC9A6/ATP1B3/ARL6IP1/KCNJ1/SLC1A2/FYN/SLC12A5/ATP1A3/KCNJ6/HFE/FOLR1/SLC1A5/WNK3/IRS2/KCNJ11/KCNJ3/SLC7A2/THBS1/SLC7A11/FXYD2/SLC3A2/ATP1A1	22
BP	GO:0030038	contractile actin filament bundle assembly	19/1785	98/18670	0.00214138	0.0192019	0.0146246	PTK2B/PIK3R1/SH3PXD2B/TGFBR1/ELN/RHOC/CLASP1/ROCK2/RHOA/CUL3/BAG4/STMN1/DLC1/EPHA1/WNT4/SMAD3/TNFAIP1/PPM1F/NF2	19
BP	GO:0043149	stress fiber assembly	19/1785	98/18670	0.00214138	0.0192019	0.0146246	PTK2B/PIK3R1/SH3PXD2B/TGFBR1/ELN/RHOC/CLASP1/ROCK2/RHOA/CUL3/BAG4/STMN1/DLC1/EPHA1/WNT4/SMAD3/TNFAIP1/PPM1F/NF2	19
BP	GO:0046854	phosphatidylinositol phosphorylation	12/1785	50/18670	0.00218073	0.0194977	0.0148498	PIP4K2A/SOCS1/PIK3R1/SOCS7/SMG1/SOCS5/IMPAD1/PIP5K1A/PI4K2B/SOCS6/FAM126A/IP6K1	12
BP	GO:0030879	mammary gland development	25/1785	143/18670	0.00218741	0.0194977	0.0148498	HOXA9/ETV5/MAPK1/BTRC/RREB1/PHB2/CCND1/CREB1/VEGFA/GLI2/CAV1/WNT7B/WNT4/ITGA2/IRS2/WNT3A/ID2/CSF1/ARHGAP5/HIF1A/TGFBR2/PYGO2/ZNF703/LRP6/FASN	25
BP	GO:0044344	cellular response to fibroblast growth factor stimulus	25/1785	143/18670	0.00218741	0.0194977	0.0148498	DSTYK/ZFP36L1/RAB14/ZFP36L2/POLR2F/SHOC2/SPRY1/TRIM71/MAPK1/FGF2/HNRNPF/GALNT3/FGFRL1/HHIP/FRS2/SHCBP1/WNT4/CBL/CRKL/RBFOX2/SPRED1/THBS1/PTBP1/SPRY4/FGF9	25
BP	GO:0019884	antigen processing and presentation of exogenous antigen	30/1785	182/18670	0.00219064	0.0194977	0.0148498	SAR1B/SEC24A/PSMD3/AP1S1/SH3GL2/PSME3/KIF23/AP2M1/SPTBN2/CAPZA2/KIF5A/TRAF6/AP3D1/CALR/KIF2A/HLA-DRA/CANX/KIF3B/PSMA2/CAPZA1/ACTR1A/SEC23A/PSMA7/CAPZB/VAMP8/PSMF1/ARF1/KIF3A/DYNC1LI2/SEC24C	30
BP	GO:0030041	actin filament polymerization	30/1785	182/18670	0.00219064	0.0194977	0.0148498	PTK2B/CCR7/TWF1/ACTR2/ELN/SPTBN2/CAPZA2/ARF6/RHOA/PRKCD/BAG4/WHAMM/PAK3/WASF3/GBA2/RDX/PLEKHG2/PRKCE/CAPZA1/ALOX15/SLIT2/MYO1C/MTPN/HAX1/RICTOR/CAPZB/WASL/ARF1/VASP/SPIRE1	30
BP	GO:0045639	positive regulation of myeloid cell differentiation	18/1785	91/18670	0.00219587	0.0195153	0.0148632	ETS1/ZFP36L1/ACVR2A/HMGB2/JUN/TRAF6/FOS/CREB1/RB1/FOXO3/ID2/HAX1/CSF1/JAG1/ACIN1/HIF1A/KLF10/MPL	18
BP	GO:0033077	T cell differentiation in thymus	15/1785	70/18670	0.00220536	0.0195431	0.0148844	CCR7/CDK6/ZEB1/ZFP36L1/ZFP36L2/SOS1/FZD5/TP53/GLI2/WNT4/CD3E/ADAM17/ERBB2/ZC3H8/BCL11B	15
BP	GO:0031099	regeneration	32/1785	198/18670	0.00220553	0.0195431	0.0148844	NDEL1/TGFBR3/PTEN/PTPN12/CLDN1/RTN4R/IGF2R/CDKN1A/RTN4RL1/JUN/AURKA/BCL9/ULK1/MAP2K1/EZH2/CCND1/PTGFRN/EPHA4/BAK1/MAP1B/GATA4/HFE/FOLR1/AKIRIN1/CCNB1/MTPN/TARBP2/KREMEN1/PCNA/TGFBR2/LRIG2/NOTCH1	32
BP	GO:1900739	regulation of protein insertion into mitochondrial membrane involved in apoptotic signaling pathway	8/1785	26/18670	0.00222633	0.0195432	0.0148845	YWHAZ/YWHAH/YWHAQ/YWHAE/TP53/TFDP2/PMAIP1/MAPK8	8
BP	GO:1900740	positive regulation of protein insertion into mitochondrial membrane involved in apoptotic signaling pathway	8/1785	26/18670	0.00222633	0.0195432	0.0148845	YWHAZ/YWHAH/YWHAQ/YWHAE/TP53/TFDP2/PMAIP1/MAPK8	8
BP	GO:0043200	response to amino acid	21/1785	113/18670	0.00222903	0.0195432	0.0148845	SOCS1/SESN3/ZEB1/CPEB3/EDN1/TMBIM6/SLC1A2/RHOA/FYN/COL3A1/CREB1/MTHFR/IPO5/DNMT3A/SESN2/CRLS1/PCK1/CPEB1/PCNA/LYN/CASP3	21
BP	GO:1905897	regulation of response to endoplasmic reticulum stress	17/1785	84/18670	0.00222931	0.0195432	0.0148845	USP25/PIK3R1/YOD1/PPP1R15B/DNAJB9/TMEM33/ATF6B/USP14/TMBIM6/SIRT1/BAK1/CAV1/PMAIP1/UBQLN1/HYOU1/NFE2L2/ATXN3	17
BP	GO:0061418	regulation of transcription from RNA polymerase II promoter in response to hypoxia	16/1785	77/18670	0.00223506	0.0195432	0.0148845	PSMD3/PSME3/UBB/BACH1/TP53/VEGFA/PSMA2/PSMA7/HIF1A/PSMF1/LIMD1/CUL2/NOTCH1/NFE2L2/CITED2/RBPJ	16
BP	GO:1901224	positive regulation of NIK/NF-kappaB signaling	16/1785	77/18670	0.00223506	0.0195432	0.0148845	AGO1/HMGB1/TIRAP/NFAT5/TNFRSF10B/LIMS1/APP/TRIM44/PDCD4/EDN1/TRAF6/RHOA/CALR/CARD10/ZFP91/TLR4	16
BP	GO:0032908	regulation of transforming growth factor beta1 production	5/1785	11/18670	0.00224143	0.0195432	0.0148845	FURIN/GATA6/LAPTM4B/CD2AP/THBS1	5
BP	GO:0060439	trachea morphogenesis	5/1785	11/18670	0.00224143	0.0195432	0.0148845	MAPK1/MAP2K1/WNT7B/TGFBR2/LRP6	5
BP	GO:0061314	Notch signaling involved in heart development	5/1785	11/18670	0.00224143	0.0195432	0.0148845	NOTCH2/SNAI2/JAG1/NOTCH1/RBPJ	5
BP	GO:1905245	regulation of aspartic-type peptidase activity	5/1785	11/18670	0.00224143	0.0195432	0.0148845	EFNA1/ROCK2/EPHA4/PICALM/LYN	5
BP	GO:2000786	positive regulation of autophagosome assembly	5/1785	11/18670	0.00224143	0.0195432	0.0148845	PIP4K2A/ULK1/RALB/RAB3GAP2/SH3GLB1	5
BP	GO:0007019	microtubule depolymerization	11/1785	44/18670	0.00232742	0.0202143	0.0153957	MID1IP1/TAOK1/APC2/CLASP1/CAMSAP2/KIF2A/STMN1/MAP1B/MID1/CCSAP/CAMSAP1	11
BP	GO:0016311	dephosphorylation	65/1785	478/18670	0.00232742	0.0202143	0.0153957	PPP1R1A/PPM1A/PDP2/PALD1/ARPP19/PPP1R3B/MTMR3/PTEN/PTPN14/PTPN12/HSP90B1/DUSP2/PTP4A1/SHOC2/PPP1R11/PPP1R15B/SET/DUSP4/MTMR4/PPM1L/CDC25A/BTRC/YWHAE/PPP6R1/PPTC7/PPP1R9B/ROCK2/IMPAD1/DUSP14/PRKCD/CRY2/PPP6C/PTPRM/PPP1R12A/PHLPP2/BAG4/DLC1/PIN1/SMAD3/FKBP1A/PPP2CB/CTDSP1/PHACTR4/PPM1D/PPM1F/ITGA2/PPM1H/SYNJ1/CTDNEP1/PPM1K/SPRED1/CALM1/PPP2CA/PTPRD/PPP2R5E/CTDSP2/PTBP1/CTDSPL/PTPDC1/LHPP/PTPRJ/PPP2…	65
BP	GO:0044774	mitotic DNA integrity checkpoint	20/1785	106/18670	0.00232853	0.0202143	0.0153957	MDM4/TAOK1/ZNF385A/HMGA2/CDKN1A/AURKA/CNOT6L/CASP2/BTG2/TP53/CCND1/TFDP2/CARM1/E2F7/RFWD3/FOXN3/CCNB1/PCNA/ATM/CLSPN	20
BP	GO:0045444	fat cell differentiation	35/1785	223/18670	0.00234931	0.0203652	0.0155105	SOCS1/ZBTB7A/ZFP36L1/ZFP36L2/SH3PXD2B/NR4A2/ZNF385A/HMGA2/CCDC71L/ZADH2/OSBPL8/TAF8/TBL1XR1/ARNTL/SIRT1/CCND1/CREB1/CARM1/ASXL1/TCF7L2/RUNX1T1/TRIB3/SMAD3/CTBP2/RORA/ZFPM2/STK4/WNT3A/SNAI2/INSIG1/ID2/JAG1/HNRNPU/BSCL2/FOXO1	35
BP	GO:0002478	antigen processing and presentation of exogenous peptide antigen	29/1785	175/18670	0.00236935	0.0205046	0.0156167	SAR1B/SEC24A/PSMD3/AP1S1/SH3GL2/PSME3/KIF23/AP2M1/SPTBN2/CAPZA2/KIF5A/TRAF6/CALR/KIF2A/HLA-DRA/CANX/KIF3B/PSMA2/CAPZA1/ACTR1A/SEC23A/PSMA7/CAPZB/VAMP8/PSMF1/ARF1/KIF3A/DYNC1LI2/SEC24C	29
BP	GO:0001755	neural crest cell migration	13/1785	57/18670	0.00237223	0.0205046	0.0156167	FN1/SEMA6A/SEMA4C/CORO1C/PHOX2B/EFNB1/PHACTR4/FOLR1/ACVR1/HIF1A/SEMA6D/PITX2/SEMA7A	13
BP	GO:0030073	insulin secretion	33/1785	207/18670	0.00238481	0.0205665	0.0156639	GLUL/CACNA1C/EPHA5/SYT7/KIF5B/CPT1A/CACNA2D2/SERP1/CLOCK/RFX3/MYO5A/ARNTL/NEUROD1/IRS1/TCF7L2/SLC16A1/REST/CFTR/STXBP3/RAB11FIP2/IRS2/PRKCE/KCNJ11/VSNL1/RFX6/SLC2A1/SIDT2/SNAP25/HIF1A/MIDN/CPLX1/SIRT4/NLGN2	33
BP	GO:0002040	sprouting angiogenesis	30/1785	183/18670	0.00238626	0.0205665	0.0156639	GLUL/PTK2B/CCBE1/RECK/PDPK1/EPN1/MAP2K5/ITGB1/FGF2/MAP3K3/RHOA/SEMA6A/FBXW7/E2F7/KDR/ADAMTS9/VEGFA/CARD10/AKT3/SLIT2/SPRED1/SMAD1/E2F2/THBS1/FLT1/LOXL2/NOTCH1/EPHB4/SYNJ2BP/NGFR	30
BP	GO:0043552	positive regulation of phosphatidylinositol 3-kinase activity	9/1785	32/18670	0.0024001	0.0205969	0.015687	PTK2B/CCR7/ATG14/FGF2/VAV3/IRS1/PDGFB/FLT1/LYN	9
BP	GO:0050779	RNA destabilization	9/1785	32/18670	0.0024001	0.0205969	0.015687	KHSRP/ZFP36L1/ZFP36L2/YTHDF3/TRIM71/CPEB3/CNOT6L/ROCK2/PUM1	9
BP	GO:1903955	positive regulation of protein targeting to mitochondrion	9/1785	32/18670	0.0024001	0.0205969	0.015687	BAP1/SREBF2/FZD5/FBXW7/NPEPPS/ARIH2/PRKAA1/SH3GLB1/LEPROT	9
BP	GO:0007223	Wnt signaling pathway, calcium modulating pathway	10/1785	38/18670	0.00241458	0.0206031	0.0156917	AGO1/AGO4/FZD6/FZD5/FZD2/TCF7L2/CALM1/TNRC6A/NLK/TNRC6B	10
BP	GO:0016572	histone phosphorylation	10/1785	38/18670	0.00241458	0.0206031	0.0156917	RPS6KA5/HMGA2/CHEK1/AURKA/PRKAA2/PRKCD/UBE2B/CCNB1/PRKAA1/ATM	10
BP	GO:0045022	early endosome to late endosome transport	10/1785	38/18670	0.00241458	0.0206031	0.0156917	MAPK1/SNX12/EZR/FAM160A2/MAP2K1/RAB21/RDX/SNX16/MSN/WDR81	10
BP	GO:0060045	positive regulation of cardiac muscle cell proliferation	10/1785	38/18670	0.00241458	0.0206031	0.0156917	TGFBR3/PIM1/MAPK1/FGF2/GATA6/ZFPM2/CCNB1/NOTCH1/FGF9/RBPJ	10
BP	GO:0046579	positive regulation of Ras protein signal transduction	14/1785	64/18670	0.0024926	0.0212385	0.0161757	RTN4R/SHOC2/NOTCH2/MAPRE2/COL3A1/KRAS/CRKL/IRS2/CSF1/F2R/LYN/NOTCH1/EPOR/F2RL1	14
BP	GO:0031498	chromatin disassembly	7/1785	21/18670	0.00251462	0.0213049	0.0162262	ARID1A/SMARCE1/SMARCC1/SET/SMARCD1/HMGA1/SUPT16H	7
BP	GO:0071498	cellular response to fluid shear stress	7/1785	21/18670	0.00251462	0.0213049	0.0162262	PTK2B/HAS2/MAP2K5/SOCS5/SREBF2/MTSS1/NFE2L2	7
BP	GO:2000737	negative regulation of stem cell differentiation	7/1785	21/18670	0.00251462	0.0213049	0.0162262	ZFP36L2/REST/WNT3A/JAG1/NOTCH1/NFE2L2/HNRNPU	7
BP	GO:2001014	regulation of skeletal muscle cell differentiation	7/1785	21/18670	0.00251462	0.0213049	0.0162262	CYP26B1/SIX4/ARNTL/NLN/DDX5/AKIRIN1/MYOCD	7
BP	GO:0051057	positive regulation of small GTPase mediated signal transduction	15/1785	71/18670	0.0025538	0.0216063	0.0164558	RTN4R/SHOC2/NOTCH2/MAPRE2/SOS1/COL3A1/KRAS/CRKL/IRS2/CSF1/F2R/LYN/NOTCH1/EPOR/F2RL1	15
BP	GO:0090276	regulation of peptide hormone secretion	33/1785	208/18670	0.00258079	0.0217991	0.0166026	GLUL/CACNA1C/EPHA5/RASL10B/SYT7/KIF5B/CPT1A/CACNA2D2/SERP1/CLOCK/RFX3/ARNTL/NEUROD1/IRS1/TCF7L2/SLC16A1/REST/CFTR/HFE/IRS2/PRKCE/KCNJ11/VSNL1/RFX6/SLC2A1/SIDT2/AIMP1/SNAP25/HIF1A/MIDN/ANXA5/SIRT4/NLGN2	33
BP	GO:0050796	regulation of insulin secretion	29/1785	176/18670	0.00258386	0.0217991	0.0166026	GLUL/CACNA1C/EPHA5/SYT7/KIF5B/CPT1A/CACNA2D2/SERP1/CLOCK/RFX3/ARNTL/NEUROD1/IRS1/TCF7L2/SLC16A1/REST/CFTR/IRS2/PRKCE/KCNJ11/VSNL1/RFX6/SLC2A1/SIDT2/SNAP25/HIF1A/MIDN/SIRT4/NLGN2	29
BP	GO:0032007	negative regulation of TOR signaling	12/1785	51/18670	0.00260799	0.0219104	0.0166874	SESN3/SIK1/PDCD6/FNIP1/ARNTL/DDIT4/PRKAA2/SIRT1/SESN2/PRKAA1/HIF1A/ATM	12
BP	GO:0035970	peptidyl-threonine dephosphorylation	6/1785	16/18670	0.00260803	0.0219104	0.0166874	PPM1A/DUSP4/PPP2CB/PPM1D/PPM1F/PPP2CA	6
BP	GO:1902004	positive regulation of amyloid-beta formation	6/1785	16/18670	0.00260803	0.0219104	0.0166874	EFNA1/APP/ROCK2/EPHA4/PICALM/CASP3	6
BP	GO:0046879	hormone secretion	45/1785	308/18670	0.0026978	0.0226328	0.0172376	GLUL/CACNA1C/EPHA5/RASL10B/SYT7/KIF5B/CPT1A/UBE2Q1/CACNA2D2/SERP1/CLOCK/RFX3/MYO5A/EDN1/ARNTL/NEUROD1/IRS1/RAB11FIP1/CREB1/TCF7L2/SLC16A1/REST/CFTR/STXBP3/HFE/RAB1A/RAB11FIP2/IRS2/PRKCE/KCNJ11/VSNL1/RFX6/SLC2A1/SIDT2/AIMP1/SNAP25/HIF1A/MIDN/CPLX1/VAMP8/ANXA5/TMF1/LYN/SIRT4/NLGN2	45
BP	GO:0034446	substrate adhesion-dependent cell spreading	19/1785	100/18670	0.00272291	0.0228115	0.0173737	HAS2/LIMS1/AKIP1/UNC13D/EFNA1/LAMC1/RREB1/ITGB3/FN1/FERMT2/CALR/CORO1C/EPHA1/RAB1A/CRKL/PDPN/RCC2/PARVG/SRCIN1	19
BP	GO:0006839	mitochondrial transport	39/1785	258/18670	0.00274421	0.0229579	0.0174852	FLVCR1/YWHAZ/MID1IP1/PRKAB2/SLC25A24/CPT1A/GRPEL2/BAP1/SLC25A36/YWHAH/YWHAQ/YWHAE/TIMM17A/STARD3/PRKAA2/SLC35F6/SREBF2/FZD5/TP53/FBXW7/SIAH3/TFDP2/NPEPPS/BAG4/BAK1/ARIH2/PMAIP1/HSP90AA1/DNAJC15/SLC25A32/SLC25A37/HAX1/PRKAA1/SLC25A28/SH3GLB1/SIRT4/LEPROT/HSPA4/MAPK8	39
BP	GO:0030518	intracellular steroid hormone receptor signaling pathway	23/1785	130/18670	0.00274837	0.0229605	0.0174872	ARID1A/ZBTB7A/SKP2/KMT2D/UFM1/CLOCK/YWHAH/PHB2/DNAJA1/ARNTL/CCNE1/RHOA/NCOA3/CRY2/NR3C1/CALR/SIRT1/CARM1/KCTD6/RB1/DDX5/RBFOX2/RNF14	23
BP	GO:0070372	regulation of ERK1 and ERK2 cascade	44/1785	300/18670	0.0027745	0.0231466	0.0176289	PTK2B/HMGB1/CCR7/TIRAP/DSTYK/PTEN/AKAP12/CCL22/SPRY1/APP/DUSP4/JUN/FGF2/PHB2/NOTCH2/FN1/EZR/SEMA6A/MAP2K1/FBXW7/FRS2/KDR/PDGFB/PIN1/GATA4/DDT/CRKL/ALOX15/RAP1B/SPRED1/ATF3/FLT1/RAPGEF2/F2R/LYN/SPRY4/TIMP3/NOTCH1/ERBB2/EPHB2/SEMA7A/SYNJ2BP/F2RL1/TLR4	44
BP	GO:0008154	actin polymerization or depolymerization	33/1785	209/18670	0.00279042	0.0232147	0.0176808	PTK2B/CCR7/TWF1/ACTR2/ELN/SPTBN2/CAPZA2/ARF6/RHOA/PRKCD/LIMA1/BAG4/WHAMM/PAK3/WASF3/GBA2/RDX/PLEKHG2/PRKCE/CAPZA1/ALOX15/SLIT2/MYO1C/MTPN/HAX1/RICTOR/CFL2/CAPZB/WASL/ARF1/VASP/SPIRE1/F2RL1	33
BP	GO:0017148	negative regulation of translation	33/1785	209/18670	0.00279042	0.0232147	0.0176808	AGO1/IGF2BP3/KHSRP/CAPRIN2/ZFP36L1/ZFP36L2/YTHDF3/FXR1/CELF1/AGO4/TRIM71/CAPRIN1/CPEB3/CNOT6L/RARA/BTG2/ROCK2/CALR/SYNCRIP/FXR2/IGF2BP1/PURA/SAMD4B/SESN2/ENC1/UNK/DDX3X/IGF2BP2/TNRC6A/CPEB1/PUM1/CPEB2/TNRC6B	33
BP	GO:1903708	positive regulation of hemopoiesis	30/1785	185/18670	0.00282269	0.0234507	0.0178605	SOCS1/HMGB1/ETS1/CYLD/ZFP36L1/ACVR2A/HMGB2/SOCS5/JUN/RUNX3/RARA/TRAF6/RHOA/AP3D1/FOS/CREB1/GLI2/RB1/NUDT21/FOXO3/ID2/HAX1/CSF1/JAG1/ACIN1/HIF1A/KLF10/MPL/TGFBR2/ATP11C	30
BP	GO:0010971	positive regulation of G2/M transition of mitotic cell cycle	8/1785	27/18670	0.00290205	0.0240497	0.0183167	MECP2/APP/CDC25A/CCND1/PHOX2B/CCNB1/BRD4/RCC2	8
BP	GO:0031060	regulation of histone methylation	14/1785	65/18670	0.00290282	0.0240497	0.0183167	MECP2/BCOR/MLLT6/KMT2E/NSD1/KMT2A/SIRT1/MTHFR/OGT/PHF19/JARID2/BRD4/MTF2/PYGO2	14
BP	GO:0051384	response to glucocorticoid	25/1785	146/18670	0.0029208	0.0241594	0.0184003	ZFP36L1/ZFP36L2/CLDN1/CREBRF/FBXO32/CDKN1A/TFAP4/EDN1/RHOA/DDIT4/ADAM9/NR3C1/FOS/CCND1/REST/KRAS/WNT7B/SLIT2/ATP2B1/FOXO3/PCK1/PCNA/CASP3/HNRNPU/FOXO1	25
BP	GO:0032526	response to retinoic acid	20/1785	108/18670	0.00292413	0.0241594	0.0184003	CYP26B1/PTK2B/RARG/ASCL1/PAX2/ACER2/IGF2R/ABL2/PHB2/RARA/RARB/CREB1/ASXL1/WNT7B/RXRB/RXRA/WNT3A/PCK1/ATM/LYN	20
BP	GO:0043536	positive regulation of blood vessel endothelial cell migration	16/1785	79/18670	0.00293961	0.0242107	0.0184393	HMGB1/PDPK1/ETS1/FGF2/MAP3K3/SP1/AMOTL1/SIRT1/KDR/VEGFA/PDGFB/AKT3/THBS1/ADAM17/HIF1A/NFE2L2	16
BP	GO:1903312	negative regulation of mRNA metabolic process	16/1785	79/18670	0.00293961	0.0242107	0.0184393	AXIN2/TIRAP/PABPC1/SRSF6/HNRNPA0/RNPS1/PKP1/SYNCRIP/IGF2BP1/YBX1/HNRNPC/DYRK1A/CCNT1/ANGEL2/PTBP1/HNRNPU	16
BP	GO:0000281	mitotic cytokinesis	15/1785	72/18670	0.00294651	0.0242107	0.0184393	KLHDC8B/ESPL1/KIF23/ZFYVE26/CDT1/RHOC/CEP55/ROCK2/RHOA/STMN1/SNX18/RHOB/SON/VPS4A/ARF1	15
BP	GO:0061180	mammary gland epithelium development	15/1785	72/18670	0.00294651	0.0242107	0.0184393	ETV5/MAPK1/BTRC/RREB1/PHB2/CCND1/GLI2/WNT7B/WNT4/ID2/CSF1/HIF1A/PYGO2/ZNF703/LRP6	15
BP	GO:0031529	ruffle organization	12/1785	52/18670	0.00310087	0.0254093	0.0193523	CCR7/NDEL1/ARF6/LIMA1/CORO1C/BAG4/PIP5K1A/RDX/CAV1/SNX10/PLEKHA1/RCC2	12
BP	GO:0072132	mesenchyme morphogenesis	12/1785	52/18670	0.00310087	0.0254093	0.0193523	ACTA1/MDM4/TGFBR1/TMEM100/SMAD3/ACVR1/WNT3A/SNAI2/MYC/TGFBR2/NOTCH1/RBPJ	12
BP	GO:0034599	cellular response to oxidative stress	44/1785	302/18670	0.00314882	0.025767	0.0196247	GSKIP/PAX2/SLC25A24/ETS1/GCH1/ATP2A2/ETV5/NR4A2/OXR1/NONO/JUN/MAPK1/CAMKK2/ARNTL/PRKAA2/FYN/PRKCD/SIRT1/TP53/EZH2/FOS/FBXW7/REST/GATA4/UBQLN1/RHOB/SESN2/PLEKHA1/FOXO3/ALDH3B1/KDM6B/SLC7A11/ZNF622/TP53INP1/PRKAA1/PAWR/HIF1A/PCNA/MAPK8/NFE2L2/FOXO1/FXN/CPEB2/TLR4	44
BP	GO:0046486	glycerolipid metabolic process	57/1785	414/18670	0.00318146	0.0259667	0.0197768	PIP4K2A/SOCS1/PIK3R1/MECP2/LCLAT1/SOCS7/MTMR3/CPT1A/RAB14/ATG14/PTEN/CPNE3/SIK1/SMG1/SLC27A1/SOCS5/MTMR4/FGF2/PISD/OSBPL8/GPCPD1/TBL1XR1/GDE1/IMPAD1/ALDH5A1/SIRT1/FBXW7/PIGG/GK5/PIP5K1A/PI4K2B/PDGFB/CAV1/PLA2G12A/PNPLA6/ACSL4/SOCS6/SLC44A1/SYNJ1/CTDNEP1/ALOX15/PLEKHA1/CRLS1/CEPT1/FAM126A/INSIG1/PIGS/LPCAT1/ETNK1/IP6K1/PCK1/MBOAT2/ATM/PCYT1A/ARF1/PAFAH1B1/PLEKHA8	57
BP	GO:1901216	positive regulation of neuron death	18/1785	94/18670	0.0031819	0.0259667	0.0197768	CDC34/ASCL1/JUN/CASP2/RHOA/DDIT4/FYN/TP53/FOS/FBXW7/PAK3/REST/PIN1/PICALM/FOXO3/ATM/CASP3/TLR4	18
BP	GO:0051101	regulation of DNA binding	22/1785	124/18670	0.0032387	0.0263943	0.0201024	HMGB1/ZBTB7A/BCL3/SKI/NSD1/HMGA2/HMGB2/CDT1/HAND1/JUN/TFAP4/TRAF6/NEUROD1/FBXW7/RB1/ITGA2/WNT3A/ID2/MYOCD/CEBPG/MAPK8/HABP4	22
BP	GO:0021761	limbic system development	20/1785	109/18670	0.00326677	0.0265869	0.0202491	EPHA5/ETS1/CDK6/KIF5B/PTEN/UBB/YWHAE/RARA/EZH1/BTG2/NEUROD1/EZH2/PHLPP2/EMX2/CRKL/WNT3A/KDM6B/NF2/CASP3/PAFAH1B1	20
BP	GO:0008361	regulation of cell size	29/1785	179/18670	0.00332952	0.0270609	0.0206101	LRRC8A/RARG/NDEL1/BDNF/PTEN/RTN4R/DCC/VAV3/FN1/EDN1/GDI1/RHOA/SEMA6A/RAB21/SEMA4C/SLC12A5/CREB1/VEGFA/RDX/MAP1B/AKT3/WNT3A/MTPN/FSTL4/SEMA6D/PAFAH1B1/MSN/SEMA7A/WDTC1	29
BP	GO:0002088	lens development in camera-type eye	16/1785	80/18670	0.0033554	0.0271144	0.0206509	NHS/SIX3/SKI/TGFBR1/LCTL/TBC1D20/FRS2/SKIL/WNT7B/SMAD3/VIM/HIPK1/SLC7A11/NF2/TGFBR2/PYGO2	16
BP	GO:0097061	dendritic spine organization	16/1785	80/18670	0.0033554	0.0271144	0.0206509	IGF1R/CAPRIN2/PTEN/EFNA1/ACTR2/CAPRIN1/FYN/EPHA4/PAK3/ITGA3/SIPA1L1/WASL/ARF1/EPHB2/PAFAH1B1/SRCIN1	16
BP	GO:0140029	exocytic process	16/1785	80/18670	0.0033554	0.0271144	0.0206509	SNAPIN/RAB10/UNC13A/RALB/CFTR/STXBP3/CTBP2/SYNJ1/SNAP25/VPS33A/CPLX1/VAMP8/LYN/RAB15/VAMP1/STXBP1	16
BP	GO:0051091	positive regulation of DNA-binding transcription factor activity	39/1785	261/18670	0.00336875	0.0271144	0.0206509	ZBTB7A/TIRAP/EPHA5/NKX2-2/PTEN/FLOT1/CRTC2/CLOCK/RPS6KA5/UBE2V1/UBB/APP/PHB2/EDN1/TRAF6/NEUROD1/LRRFIP1/RNF41/NFAM1/CARM1/FZD2/KRAS/VEGFA/TRIM5/CAV1/SMAD3/NPM1/MTDH/IRAK4/WNT3A/MTPN/DHX33/MYOCD/CEBPG/LRP6/TAB2/TRAF1/CRTC1/TLR4	39
BP	GO:0018108	peptidyl-tyrosine phosphorylation	51/1785	363/18670	0.00337243	0.0271144	0.0206509	SOCS1/PTK2B/IGF1R/EPHA5/DSTYK/WEE1/BDNF/MAP2K5/TGFA/TTN/TWF1/EFNA1/ABL2/SOCS5/APP/CAMKK2/SH3BP5/ITGB3/FYN/PRKCD/MAP2K1/TP53/FBXW7/EPHA4/RAP2C/FRK/KDR/VEGFA/PDGFB/EPHA1/CAV1/CBL/PAK2/PRKCE/ACVR1/WNT3A/HAX1/NF2/PPP2CA/CD3E/FLT1/RICTOR/DYRK1A/ADAM17/NCAPG2/LYN/PTPRJ/ERBB2/EPHB2/SRCIN1/EPHB4	51
BP	GO:0032069	regulation of nuclease activity	7/1785	22/18670	0.00338734	0.0271144	0.0206509	HMGB1/HMGB2/TMBIM6/PRKCD/SIRT1/NPM1/PCNA	7
BP	GO:0046058	cAMP metabolic process	7/1785	22/18670	0.00338734	0.0271144	0.0206509	PDE7B/ADCY6/PDE4C/ADCY9/PDE4A/PDE4D/PDE10A	7
BP	GO:0097320	plasma membrane tubulation	7/1785	22/18670	0.00338734	0.0271144	0.0206509	SH3GL2/PACSIN1/MICALL1/WHAMM/PLEKHM2/WASL/SH3GLB1	7
BP	GO:1901798	positive regulation of signal transduction by p53 class mediator	7/1785	22/18670	0.00338734	0.0271144	0.0206509	ZNF385A/UBB/HIC1/PMAIP1/DDX5/SPRED1/ATM	7
BP	GO:0072401	signal transduction involved in DNA integrity checkpoint	15/1785	73/18670	0.00338762	0.0271144	0.0206509	MDM4/ZNF385A/CHEK1/CDKN1A/AURKA/CNOT6L/CASP2/BTG2/TP53/TFDP2/CARM1/E2F7/CCNB1/PCNA/ATM	15
BP	GO:0072422	signal transduction involved in DNA damage checkpoint	15/1785	73/18670	0.00338762	0.0271144	0.0206509	MDM4/ZNF385A/CHEK1/CDKN1A/AURKA/CNOT6L/CASP2/BTG2/TP53/TFDP2/CARM1/E2F7/CCNB1/PCNA/ATM	15
BP	GO:0006984	ER-nucleus signaling pathway	11/1785	46/18670	0.00339044	0.0271144	0.0206509	ATP2A2/HSP90B1/PPP1R15B/TMEM33/ATF6B/CALR/TP53/FBXW7/INSIG1/ATF3/NFE2L2	11
BP	GO:0045814	negative regulation of gene expression, epigenetic	19/1785	102/18670	0.00343103	0.0273881	0.0208593	HMGB1/MECP2/KMT2D/SUZ12/EZH1/HMGA1/SIRT1/EZH2/MTHFR/PHF19/DNMT3A/JARID2/PPM1D/ATAD2/CREBZF/MTF2/MIER1/MORF4L2/SIRT4	19
BP	GO:1901222	regulation of NIK/NF-kappaB signaling	21/1785	117/18670	0.00344081	0.0273881	0.0208593	AGO1/PPM1A/HMGB1/TIRAP/CYLD/NFAT5/BCL3/TNFRSF10B/LIMS1/AKIP1/APP/TRIM44/PDCD4/EDN1/TRAF6/RHOA/CALR/LITAF/CARD10/ZFP91/TLR4	21
BP	GO:0035023	regulation of Rho protein signal transduction	24/1785	140/18670	0.00344751	0.0273881	0.0208593	FLOT1/DNMBP/CDC42SE1/RTN4R/ABL2/ITGB1/VAV3/SOS1/CUL3/COL3A1/STMN1/PLEKHG2/DLC1/TNFAIP1/ITSN2/ITGA3/SPATA13/CDC42SE2/ARHGAP42/F2R/ARHGEF3/BCR/ARHGDIA/F2RL1	24
BP	GO:0072073	kidney epithelium development	24/1785	140/18670	0.00344751	0.0273881	0.0208593	SIX4/PAX2/SALL1/SPRY1/FGF2/RARA/BASP1/RARB/PKD1/EPHA4/IRX2/VEGFA/WNT7B/WNT4/SMAD3/PODXL/MTSS1/SMAD7/SIX2/SLIT2/SMAD1/JAG1/MYC/NOTCH1	24
BP	GO:1903364	positive regulation of cellular protein catabolic process	24/1785	140/18670	0.00344751	0.0273881	0.0208593	ARIH1/PTK2B/DDA1/PTEN/TRIM67/SOCS5/AURKA/EZR/TMTC3/AMER1/FBXW7/SMURF1/RDX/TRIB3/ARIH2/CAV1/UBQLN1/HSP90AA1/SMAD7/CBFA2T3/RNF14/NFE2L2/MSN/ATXN3	24
BP	GO:0040013	negative regulation of locomotion	53/1785	381/18670	0.00350514	0.027809	0.0211799	HMGB1/MECP2/RECK/IDH2/MITF/MAP2K5/PTEN/CLIC4/ARRDC3/FGF2/CD200R1/NR2F2/OSBPL8/CLASP1/RHOA/SEMA6A/RNF41/PTPRM/SEMA4C/CALR/COL3A1/CORO1C/RAP2C/ADAMTS9/DLC1/EPHA1/WNT4/PIN1/DDT/SMAD7/RHOB/CARD10/WNT3A/SLIT2/FOXO3/SPRED1/THBS1/NF2/JAG1/DACH1/TP53INP1/MYOCD/WASL/SEMA6D/PTPRJ/NOTCH1/NFE2L2/CYGB/BCR/SEMA7A/CITED2/SYNJ2BP/GPR173	53
BP	GO:0030950	establishment or maintenance of actin cytoskeleton polarity	5/1785	12/18670	0.00354173	0.0279512	0.0212882	RHOC/RND3/RHOA/RHOB/RICTOR	5
BP	GO:0032905	transforming growth factor beta1 production	5/1785	12/18670	0.00354173	0.0279512	0.0212882	FURIN/GATA6/LAPTM4B/CD2AP/THBS1	5
BP	GO:0060081	membrane hyperpolarization	5/1785	12/18670	0.00354173	0.0279512	0.0212882	CFTR/KCNQ3/SLC26A3/ATP1A1/CRTC1	5
BP	GO:0060213	positive regulation of nuclear-transcribed mRNA poly(A) tail shortening	5/1785	12/18670	0.00354173	0.0279512	0.0212882	PABPC1/CPEB3/BTG2/TNRC6A/TNRC6B	5
BP	GO:0030326	embryonic limb morphogenesis	22/1785	125/18670	0.00358403	0.0282107	0.0214858	CYP26B1/FLVCR1/RARG/RECK/CACNA1C/HOXA10/HOXA9/SKI/SALL1/AFF3/RARB/IMPAD1/FZD6/MBNL1/RDH10/TMEM231/GLI2/HOXD13/SALL4/NOTCH1/LRP6/FGF9	22
BP	GO:0035113	embryonic appendage morphogenesis	22/1785	125/18670	0.00358403	0.0282107	0.0214858	CYP26B1/FLVCR1/RARG/RECK/CACNA1C/HOXA10/HOXA9/SKI/SALL1/AFF3/RARB/IMPAD1/FZD6/MBNL1/RDH10/TMEM231/GLI2/HOXD13/SALL4/NOTCH1/LRP6/FGF9	22
BP	GO:0043534	blood vessel endothelial cell migration	29/1785	180/18670	0.00361552	0.028384	0.0216178	PTK2B/HMGB1/MECP2/PDPK1/ETS1/MAP2K5/EFNA1/ITGB1/AMOT/FGF2/MAP3K3/SP1/AMOTL1/RHOA/SIRT1/FBXW7/KDR/VEGFA/PDGFB/CARD10/AKT3/SLIT2/SPRED1/THBS1/ADAM17/HIF1A/NOTCH1/NFE2L2/EPHB4	29
BP	GO:1901796	regulation of signal transduction by p53 class mediator	29/1785	180/18670	0.00361552	0.028384	0.0216178	RRS1/CHD4/TP53RK/PRKAB2/MDM4/BCL2L12/ZNF385A/UBB/CHEK1/AURKA/RFC5/PRKAA2/HIC1/SIRT1/TP53/DNA2/PIN1/PMAIP1/DDX5/TAF9B/SUPT16H/SPRED1/HIPK1/SNAI2/TP53INP1/RAD50/PRKAA1/DYRK1A/ATM	29
BP	GO:0071548	response to dexamethasone	10/1785	40/18670	0.00363084	0.0284669	0.021681	CLDN1/FBXO32/TFAP4/EDN1/DDIT4/NR3C1/FOXO3/PCK1/PCNA/FOXO1	10
BP	GO:0031023	microtubule organizing center organization	23/1785	133/18670	0.00369871	0.0289611	0.0220574	CCNF/NDEL1/CEP135/RAB6C/SSX2IP/CEP120/CHEK1/TMEM67/KAT2B/AURKA/CLASP1/ROCK2/PPP1R12A/SLC16A1/KIF3B/NPM1/RTTN/HAUS3/GCC2/KIF3A/PAFAH1B1/NIN/PARD6B	23
BP	GO:0033598	mammary gland epithelial cell proliferation	8/1785	28/18670	0.00372733	0.0290712	0.0221412	MAPK1/BTRC/RREB1/PHB2/CCND1/ID2/PYGO2/ZNF703	8
BP	GO:0048679	regulation of axon regeneration	8/1785	28/18670	0.00372733	0.0290712	0.0221412	NDEL1/PTEN/RTN4R/RTN4RL1/MAP2K1/EPHA4/KREMEN1/LRIG2	8
BP	GO:1902003	regulation of amyloid-beta formation	8/1785	28/18670	0.00372733	0.0290712	0.0221412	TMED10/EFNA1/APP/ROCK2/EPHA4/PIN1/PICALM/CASP3	8
BP	GO:0062208	positive regulation of pattern recognition receptor signaling pathway	9/1785	34/18670	0.00376986	0.0293266	0.0223357	HMGB1/TIRAP/FLOT1/PUM2/ZCCHC3/CAV1/PUM1/F2RL1/TLR4	9
BP	GO:2000273	positive regulation of signaling receptor activity	9/1785	34/18670	0.00376986	0.0293266	0.0223357	TGFA/ITGB1/NCOA3/FBXW7/HFE/CCR2/ADAM17/NCAPG2/EPHB2	9
BP	GO:1902749	regulation of cell cycle G2/M phase transition	33/1785	213/18670	0.003781	0.0293751	0.0223727	MECP2/PSMD3/CEP135/TAOK1/PSME3/HMGA2/CHEK1/TUBB4A/APP/AURKA/CDC25A/YWHAE/CLASP1/TP53/CCND1/MAPRE1/PHOX2B/NPM1/HSP90AA1/PSMA2/FBXL7/FOXN3/CCNB1/ACTR1A/BRD4/PSMA7/RCC2/VPS4A/HAUS3/ATM/PSMF1/CLSPN/PAFAH1B1	33
BP	GO:0035601	protein deacylation	19/1785	103/18670	0.00383879	0.0297854	0.0226852	ELK4/SKI/KDM5A/NACC2/SMARCAD1/TBL1XR1/PRKAA2/SIRT1/TP53/BAZ2A/REST/VEGFA/SPRED1/PRKAA1/DYRK1A/MIER1/MORF4L2/SIRT4/MAPK8	19
BP	GO:0002221	pattern recognition receptor signaling pathway	31/1785	197/18670	0.00387119	0.029998	0.0228471	HMGB1/PDPK1/TIRAP/CYLD/FLOT1/RPS6KA3/HSP90B1/RIOK3/UBE2V1/PUM2/UBB/ZCCHC3/CLEC7A/TRAF6/LSM14A/TRIM5/CAV1/MAP3K1/UBQLN1/RAB11FIP2/UBE2D2/IRAK4/PRKCE/TBK1/TNIP2/LYN/APPL1/TAB2/PUM1/F2RL1/TLR4	31
BP	GO:0072395	signal transduction involved in cell cycle checkpoint	15/1785	74/18670	0.00388145	0.0300386	0.022878	MDM4/ZNF385A/CHEK1/CDKN1A/AURKA/CNOT6L/CASP2/BTG2/TP53/TFDP2/CARM1/E2F7/CCNB1/PCNA/ATM	15
BP	GO:2000573	positive regulation of DNA biosynthetic process	14/1785	67/18670	0.00388955	0.0300466	0.0228841	PTK2B/DDX39B/TNKS2/MAPK1/FGF2/RFC5/NEK7/HMBOX1/PTGES3/PAK3/PDGFB/HSP90AA1/MYC/ATM	14
BP	GO:0031570	DNA integrity checkpoint	26/1785	157/18670	0.00389601	0.0300466	0.0228841	DDX39B/WAC/MDM4/TAOK1/CLOCK/ZNF385A/HMGA2/CHEK1/CDKN1A/CDT1/AURKA/CNOT6L/CASP2/BTG2/TP53/CCND1/TFDP2/CARM1/DNA2/E2F7/RFWD3/FOXN3/CCNB1/PCNA/ATM/CLSPN	26
BP	GO:0048002	antigen processing and presentation of peptide antigen	30/1785	189/18670	0.00390227	0.0300466	0.0228841	SAR1B/SEC24A/PSMD3/AP1S1/SH3GL2/PSME3/KIF23/AP2M1/SPTBN2/CAPZA2/KIF5A/TRAF6/CALR/KIF2A/HLA-DRA/CANX/KIF3B/HFE/PSMA2/CAPZA1/ACTR1A/SEC23A/PSMA7/CAPZB/VAMP8/PSMF1/ARF1/KIF3A/DYNC1LI2/SEC24C	30
BP	GO:0009416	response to light stimulus	45/1785	314/18670	0.00390254	0.0300466	0.0228841	PIK3R1/MECP2/MAP4K3/N4BP1/FBXL3/BCL3/SIK1/CLOCK/CHEK1/CDKN1A/ITGB1/APP/CDC25A/POLD3/SLC1A2/DCUN1D3/CRY2/SIRT1/TP53/FOS/CCND1/CREB1/GRIN2A/UBE2B/KRAS/BAK1/UBE4B/NPM1/PBK/SLC7A11/ID2/CALM1/CERS1/TP53INP1/YY1/RS1/PRKAA1/MYC/HIF1A/ELOVL4/PCNA/UBE2A/CASP3/MAPK8/CRTC1	45
BP	GO:0007093	mitotic cell cycle checkpoint	27/1785	165/18670	0.00392082	0.0301193	0.0229394	WEE1/MDM4/ZWINT/TAOK1/ZNF385A/HMGA2/CDKN1A/CDT1/AURKA/CNOT6L/CASP2/BTG2/ZNF207/TP53/CCND1/TFDP2/CARM1/E2F7/RB1/RFWD3/FOXN3/CCNB1/VPS4A/BUB3/PCNA/ATM/CLSPN	27
BP	GO:0048015	phosphatidylinositol-mediated signaling	29/1785	181/18670	0.00392204	0.0301193	0.0229394	PIP4K2A/PIK3R1/IGF1R/ZFP36L1/PTEN/UNC5B/MAPK1/CEP55/EZR/EDN1/RHOA/FYN/IRS1/SIRT1/MAZ/PIP5K1A/KDR/PDGFB/OGT/CBL/IRS2/PLEKHA1/HAX1/FLT1/F2R/LYN/ERBB2/EPOR/F2RL1	29
BP	GO:0018212	peptidyl-tyrosine modification	51/1785	366/18670	0.00398658	0.0305757	0.023287	SOCS1/PTK2B/IGF1R/EPHA5/DSTYK/WEE1/BDNF/MAP2K5/TGFA/TTN/TWF1/EFNA1/ABL2/SOCS5/APP/CAMKK2/SH3BP5/ITGB3/FYN/PRKCD/MAP2K1/TP53/FBXW7/EPHA4/RAP2C/FRK/KDR/VEGFA/PDGFB/EPHA1/CAV1/CBL/PAK2/PRKCE/ACVR1/WNT3A/HAX1/NF2/PPP2CA/CD3E/FLT1/RICTOR/DYRK1A/ADAM17/NCAPG2/LYN/PTPRJ/ERBB2/EPHB2/SRCIN1/EPHB4	51
BP	GO:0044706	multi-multicellular organism process	34/1785	222/18670	0.00400458	0.0306745	0.0233623	ARID1A/RECK/B4GALT1/EPN1/ETS1/SH3PXD2B/UBE2Q1/ACVR2A/PCSK5/MAPK1/NR2F2/RARA/DAZAP1/KPNA6/EDN1/ARNTL/TFCP2L1/ASH1L/CALR/FOS/KRAS/WNT4/SLC38A2/HFE/ACSL4/ITGA3/ITGA2/RXRA/SLC2A1/NAMPT/DSG2/UBE2A/TGFBR2/EPOR	34
BP	GO:0050435	amyloid-beta metabolic process	11/1785	47/18670	0.00405127	0.0309925	0.0236045	TMED10/EFNA1/APP/UNC13A/ROCK2/EPHA4/PIN1/APH1A/PICALM/DYRK1A/CASP3	11
BP	GO:0045089	positive regulation of innate immune response	33/1785	214/18670	0.00407078	0.0310249	0.0236292	HMGB1/PDPK1/MUC17/HMGB3/PSMD3/NRAS/RIOK3/RPS6KA5/PSME3/ZCCHC3/HMGB2/NONO/BTRC/XRCC6/TRAF6/FYN/PRKCD/LSM14A/PAK3/KRAS/TRIM5/PAK2/PSMA2/MICA/PSMA7/TBK1/SH2D1A/COCH/MATR3/LYN/PSMF1/ULBP2/TAB2	33
BP	GO:2001020	regulation of response to DNA damage stimulus	33/1785	214/18670	0.00407078	0.0310249	0.0236292	AXIN2/HMGB1/DDX39B/BCL2L12/OTUB1/KLHL15/SMG1/ZNF385A/UBE2V1/HMGA2/CHEK1/ACTR2/NACC2/FIGN/PRKCD/HIC1/SIRT1/TP53/UBQLN4/SKIL/PMAIP1/DDX5/RFWD3/TAF9B/SPRED1/SNAI2/DYRK1A/MYC/RAD51AP1/PCNA/ATM/CEBPG/SPIRE1	33
BP	GO:0032273	positive regulation of protein polymerization	23/1785	134/18670	0.00407104	0.0310249	0.0236292	CLIP1/PTK2B/MECP2/CCR7/ACTR2/SLAIN2/ARF6/CLASP1/RHOA/MAPRE1/BAG4/WHAMM/MAP1B/HSP90AA1/PRKCE/ALOX15/MYO1C/RICTOR/WASL/ARF1/VASP/NIN/SPIRE1	23
BP	GO:0051271	negative regulation of cellular component movement	53/1785	384/18670	0.00412323	0.0313827	0.0239017	HMGB1/MECP2/RECK/IDH2/MITF/TGFBR3/MAP2K5/PTEN/CLIC4/FGF2/CD200R1/NR2F2/OSBPL8/CLASP1/RHOA/SEMA6A/RNF41/PTPRM/SEMA4C/CALR/COL3A1/CORO1C/RAP2C/ADAMTS9/DLC1/EPHA1/WNT4/PIN1/DDT/SMAD7/RHOB/CARD10/WNT3A/SLIT2/FOXO3/SPRED1/THBS1/NF2/JAG1/DACH1/TP53INP1/MYOCD/WASL/SEMA6D/PTPRJ/NOTCH1/NFE2L2/CYGB/BCR/SEMA7A/CITED2/SYNJ2BP/GPR173	53
BP	GO:0002218	activation of innate immune response	24/1785	142/18670	0.00415472	0.0315422	0.0240232	HMGB1/PDPK1/MUC17/PSMD3/NRAS/RPS6KA5/PSME3/ZCCHC3/NONO/BTRC/XRCC6/TRAF6/FYN/PRKCD/PAK3/KRAS/TRIM5/PAK2/PSMA2/PSMA7/MATR3/LYN/PSMF1/TAB2	24
BP	GO:0038127	ERBB signaling pathway	24/1785	142/18670	0.00415472	0.0315422	0.0240232	PTK2B/PIK3R1/PDPK1/SNX5/EPN1/TGFA/PIGR/PTPN12/CPNE3/SH3GL2/HIP1/RPS6KA5/SPRY1/SOCS5/APP/MAPK1/SOS1/FBXW7/CBL/HSP90AA1/ADAM17/PTPRJ/ERBB2/RBPJ	24
BP	GO:0046890	regulation of lipid biosynthetic process	31/1785	198/18670	0.00418039	0.0316968	0.024141	KPNB1/MID1IP1/PRKAB2/ELOVL6/SIK1/SLC27A1/SCD/SP1/PRKAA2/PRKCD/ORMDL2/SREBF2/SIRT1/CREB1/FBXW7/RDH10/REST/SF1/TRIB3/PDGFB/WNT4/PDK4/CTDNEP1/SNAI2/INSIG1/LPCAT1/PRKAA1/SIRT4/FASN/ATP1A1/WDTC1	31
BP	GO:0060021	roof of mouth development	17/1785	89/18670	0.00419253	0.0317487	0.0241805	TGFBR3/BCOR/SKI/TGFBR1/SOS1/FZD2/WNT3A/PLEKHA1/SNAI2/TIPARP/INSIG1/TGFBR2/PYGO2/LRP6/EPHB2/FOXF2/ANP32B	17
BP	GO:0035567	non-canonical Wnt signaling pathway	25/1785	150/18670	0.00421347	0.0318268	0.02424	AGO1/NPHP3/PSMD3/PSME3/AP2M1/AGO4/RHOA/FZD6/ZNRF3/FZD5/FZD2/TCF7L2/SMURF1/WNT4/PSMA2/PSMA7/CALM1/CELSR3/TNRC6A/VANGL1/CELSR2/PSMF1/MLLT3/NLK/TNRC6B	25
BP	GO:0071774	response to fibroblast growth factor	25/1785	150/18670	0.00421347	0.0318268	0.02424	DSTYK/ZFP36L1/RAB14/ZFP36L2/POLR2F/SHOC2/SPRY1/TRIM71/MAPK1/FGF2/HNRNPF/GALNT3/FGFRL1/HHIP/FRS2/SHCBP1/WNT4/CBL/CRKL/RBFOX2/SPRED1/THBS1/PTBP1/SPRY4/FGF9	25
BP	GO:0007368	determination of left/right symmetry	21/1785	119/18670	0.00422821	0.0318979	0.0242941	NPHP3/LEFTY1/RFX3/ACVR2A/CC2D2A/PCSK5/HAND1/SMAD3/GATA4/KIF3B/FOLR1/MIB1/ACVR1/WNT3A/RTTN/HIF1A/TGFBR2/NOTCH1/PSKH1/PITX2/CITED2	21
BP	GO:0046488	phosphatidylinositol metabolic process	28/1785	174/18670	0.00426609	0.0321432	0.0244809	PIP4K2A/SOCS1/PIK3R1/LCLAT1/SOCS7/MTMR3/RAB14/PTEN/SMG1/SLC27A1/SOCS5/MTMR4/FGF2/IMPAD1/PIGG/PIP5K1A/PI4K2B/PDGFB/PLA2G12A/SOCS6/SYNJ1/PLEKHA1/FAM126A/PIGS/IP6K1/ATM/ARF1/PLEKHA8	28
BP	GO:0098732	macromolecule deacylation	19/1785	104/18670	0.00428591	0.032252	0.0245638	ELK4/SKI/KDM5A/NACC2/SMARCAD1/TBL1XR1/PRKAA2/SIRT1/TP53/BAZ2A/REST/VEGFA/SPRED1/PRKAA1/DYRK1A/MIER1/MORF4L2/SIRT4/MAPK8	19
BP	GO:0034644	cellular response to UV	16/1785	82/18670	0.00433263	0.0325627	0.0248004	PIK3R1/N4BP1/CHEK1/CDKN1A/CDC25A/POLD3/SIRT1/TP53/BAK1/NPM1/PBK/CERS1/TP53INP1/YY1/MYC/PCNA	16
BP	GO:0098927	vesicle-mediated transport between endosomal compartments	10/1785	41/18670	0.00439822	0.0330142	0.0251443	MAPK1/SNX12/EZR/FAM160A2/MAP2K1/RAB21/RDX/SNX16/MSN/WDR81	10
BP	GO:0001707	mesoderm formation	15/1785	75/18670	0.00443254	0.0331887	0.0252771	PAX2/HMGA2/ITGB1/HAND1/ITGB3/SMAD3/ITGA3/ITGA2/SIX2/ACVR1/WNT3A/SMAD1/KDM6B/NF2/PRKAR1A	15
BP	GO:0033143	regulation of intracellular steroid hormone receptor signaling pathway	15/1785	75/18670	0.00443254	0.0331887	0.0252771	ZBTB7A/SKP2/KMT2D/UFM1/CLOCK/PHB2/ARNTL/RHOA/CRY2/CALR/SIRT1/CARM1/KCTD6/DDX5/RNF14	15
BP	GO:0034284	response to monosaccharide	32/1785	207/18670	0.0044489	0.0332696	0.0253388	GLUL/PTK2B/IGF1R/PAX2/EPHA5/NKX2-2/KIF5B/PTEN/RHOA/NEUROD1/PRKAA2/TCF7L2/TXNIP/CFTR/GATA4/RAB11FIP2/ITGA2/IRS2/PRKCE/KCNJ11/VSNL1/SESN2/RFX6/FOXO3/SIDT2/THBS1/NAMPT/PCK1/PRKAA1/HIF1A/TGFBR2/CASP3	32
BP	GO:0071157	negative regulation of cell cycle arrest	7/1785	23/18670	0.00447293	0.0333659	0.0254122	MDM4/CCNK/TFAP4/CALR/CCND1/PHOX2B/ZNF268	7
BP	GO:0072337	modified amino acid transport	7/1785	23/18670	0.00447293	0.0333659	0.0254122	SLC5A6/SLC6A8/SLC38A2/FOLR1/SLC25A32/SLC7A11/SLC19A2	7
BP	GO:0031032	actomyosin structure organization	31/1785	199/18670	0.00451019	0.033563	0.0255623	PTK2B/PIK3R1/SIX4/ACTA1/SH3PXD2B/TTN/TGFBR1/KIF23/ITGB1/ELN/RHOC/EDN1/CLASP1/ROCK2/RHOA/CUL3/BAG4/STMN1/CSRP1/DLC1/EPHA1/WNT4/SMAD3/TNFAIP1/PPM1F/EPB41L1/NF2/PRKAR1A/VPS4A/CFL2/CSRP2	31
BP	GO:0090630	activation of GTPase activity	18/1785	97/18670	0.00451055	0.033563	0.0255623	PTK2B/CCR7/NDEL1/TAX1BP3/TBC1D2/APC2/TBC1D13/CORO1C/PIP5K1A/EPHA1/TBC1D25/CRKL/EVI5/ARHGAP42/RCC2/SIPA1L1/DOCK7/BCR	18
BP	GO:0098657	import into cell	30/1785	191/18670	0.00456153	0.0339002	0.0258191	NEURL1B/GLUL/SLC9A6/FLOT1/ATP1B3/ARL6IP1/KCNJ1/SLC27A1/ITGB3/SLC1A2/FYN/SLC12A5/ATP1A3/KCNJ6/HFE/FOLR1/SLC1A5/WNK3/IRS2/KCNJ11/KCNJ3/SLC6A9/SLC7A2/THBS1/SLC7A11/SNAP25/FXYD2/CACNG8/SLC3A2/ATP1A1	30
BP	GO:0021953	central nervous system neuron differentiation	29/1785	183/18670	0.00460122	0.0341063	0.0259761	ASCL1/NDEL1/NKX2-2/PTEN/GABRB1/SALL1/NR4A2/UBB/DCC/BTG2/EPHA4/GBA2/GLI2/PHOX2B/HSP90AA1/CRKL/RORA/WNT3A/SLIT2/MTPN/NFIB/C21orf91/RAPGEF2/B4GALT5/LRP6/EPHB2/PAFAH1B1/NIN/BCL11B	29
BP	GO:0043123	positive regulation of I-kappaB kinase/NF-kappaB signaling	29/1785	183/18670	0.00460122	0.0341063	0.0259761	PPM1A/CCR7/TIRAP/LURAP1L/TNFRSF10B/PIM2/UBE2V1/RHOC/MAP3K3/SLC20A1/TRAF6/RHOA/FYN/DDX21/LITAF/TRIM5/FKBP1A/MTDH/IRAK4/PRKCE/CXXC5/BRD4/TBK1/F2R/TNIP2/MIER1/TAB2/F2RL1/TLR4	29
BP	GO:0030336	negative regulation of cell migration	47/1785	334/18670	0.00460635	0.0341063	0.0259761	HMGB1/MECP2/RECK/IDH2/MITF/MAP2K5/PTEN/CLIC4/FGF2/CD200R1/NR2F2/OSBPL8/CLASP1/RHOA/RNF41/PTPRM/CALR/COL3A1/CORO1C/RAP2C/ADAMTS9/DLC1/EPHA1/WNT4/DDT/SMAD7/RHOB/CARD10/SLIT2/FOXO3/SPRED1/THBS1/NF2/JAG1/DACH1/TP53INP1/MYOCD/WASL/SEMA6D/PTPRJ/NOTCH1/NFE2L2/CYGB/BCR/CITED2/SYNJ2BP/GPR173	47
BP	GO:0010259	multicellular organism aging	9/1785	35/18670	0.00465184	0.0343159	0.0261357	RNF165/SERP1/SEC63/EDN1/SLC1A2/TFCP2L1/TP53/PRDM2/ATM	9
BP	GO:0071108	protein K48-linked deubiquitination	9/1785	35/18670	0.00465184	0.0343159	0.0261357	USP25/OTUD5/CYLD/OTUB1/BAP1/YOD1/USP37/OTUD7B/ATXN3	9
BP	GO:1901030	positive regulation of mitochondrial outer membrane permeabilization involved in apoptotic signaling pathway	9/1785	35/18670	0.00465184	0.0343159	0.0261357	YWHAZ/YWHAH/YWHAQ/YWHAE/TP53/TFDP2/BAK1/PMAIP1/MAPK8	9
BP	GO:0009914	hormone transport	45/1785	317/18670	0.00466098	0.034341	0.0261548	GLUL/CACNA1C/EPHA5/RASL10B/SYT7/KIF5B/CPT1A/UBE2Q1/CACNA2D2/SERP1/CLOCK/RFX3/MYO5A/EDN1/ARNTL/NEUROD1/IRS1/RAB11FIP1/CREB1/TCF7L2/SLC16A1/REST/CFTR/STXBP3/HFE/RAB1A/RAB11FIP2/IRS2/PRKCE/KCNJ11/VSNL1/RFX6/SLC2A1/SIDT2/AIMP1/SNAP25/HIF1A/MIDN/CPLX1/VAMP8/ANXA5/TMF1/LYN/SIRT4/NLGN2	45
BP	GO:1901617	organic hydroxy compound biosynthetic process	39/1785	266/18670	0.00468022	0.0344404	0.0262305	KPNB1/PTK2B/ACER3/ELOVL6/GCH1/ACER2/PPIP5K2/NR4A2/MYO5A/FGF2/SCD/SP1/IMPAD1/PRKAA2/SREBF2/SIRT1/CNBP/REST/SPTLC2/CFTR/WNT4/DDT/PSAT1/OSBPL3/ALOX15/SNAI2/INSIG1/SLC7A11/IP6K1/PCK1/PRKAA1/CYP8B1/RAPGEF2/IPPK/APPL1/LBR/OSBPL2/SPTLC1/FASN	39
BP	GO:0030901	midbrain development	17/1785	90/18670	0.0047193	0.0346262	0.026372	EN2/ZNF148/NR4A2/YWHAH/YWHAQ/YWHAE/BASP1/RHOA/FZD6/SOS1/OTX1/WNT3A/SMAD1/COX6B1/CALM1/LRP6/FGF9	17
BP	GO:0031114	regulation of microtubule depolymerization	8/1785	29/18670	0.00472281	0.0346262	0.026372	MID1IP1/TAOK1/APC2/CLASP1/CAMSAP2/MAP1B/MID1/CAMSAP1	8
BP	GO:2000171	negative regulation of dendrite development	8/1785	29/18670	0.00472281	0.0346262	0.026372	PTEN/EFNA1/YWHAH/DCC/ARF6/CARM1/FSTL4/RAPGEF2	8
BP	GO:1901215	negative regulation of neuron death	32/1785	208/18670	0.00478856	0.0350654	0.0267065	PTK2B/MECP2/SIX4/PDPK1/BDNF/EN2/UNC5B/NR4A2/OXR1/SET/NONO/JUN/CD200R1/BTG2/RHOA/FYN/SIRT1/CREB1/REST/BTBD10/KRAS/PIN1/CBL/WNT3A/SLC7A11/CSF1/HIF1A/F2R/GFRAL/HYOU1/CHL1/STXBP1	32
BP	GO:0002576	platelet degranulation	22/1785	128/18670	0.00480972	0.0350991	0.0267322	LEFTY2/GTPBP2/NHLRC2/TTN/APP/ITGB3/FN1/CDC37L1/PROS1/VEGFA/PDGFB/OLA1/PCDH7/TOR4A/THBS1/CALM1/FAM3C/ANXA5/LYN/TIMP3/HABP4/STXBP1	22
BP	GO:0008089	anterograde axonal transport	11/1785	48/18670	0.00481074	0.0350991	0.0267322	SNAPIN/KIF5B/TRAK1/KIF5A/RAB21/AP3D1/KIF5C/KIF3B/ARL8B/ARL8A/KIF3A	11
BP	GO:0051653	spindle localization	11/1785	48/18670	0.00481074	0.0350991	0.0267322	KPNB1/NDEL1/LLGL1/ESPL1/SPRY1/ACTR2/CLASP1/ACTR1A/WASL/PAFAH1B1/SPIRE1	11
BP	GO:0043414	macromolecule methylation	44/1785	309/18670	0.00482102	0.0351313	0.0267567	MECP2/SETD5/SETD1B/KMT2D/BCOR/MLLT6/KMT2E/SNRPB/MBD2/NSD1/TRMT10B/KMT2A/SUZ12/EZH1/TET3/ARID4B/BTG2/SETD1A/ASH1L/SIRT1/EZH2/FOS/BAZ2A/CARM1/MTHFR/PRDM4/OGT/PHF19/WTAP/PCMT1/DNMT3A/JARID2/PPM1D/BRD4/PRDM2/RLF/FBXO11/MTF2/ICMT/MYC/BTG1/PYGO2/SNRPD3/FTSJ3	44
BP	GO:0006970	response to osmotic stress	16/1785	83/18670	0.00490205	0.0356783	0.0271733	LRRC8A/PTK2B/PDPK1/NFAT5/CAB39/ZFP36L1/CLDN1/XRCC6/TSC22D2/TP53/SLC12A5/ITGA2/SLC2A1/DDX3X/CASP3/LRRC8D	16
BP	GO:0048285	organelle fission	60/1785	449/18670	0.00491895	0.0357579	0.0272339	CYP26B1/KPNB1/RRS1/NDEL1/NME6/TGFA/COX10/KLHDC8B/PHF13/TTN/ZWINT/ESPL1/KLHDC3/PDS5A/CDC27/KIF23/UBB/CHEK1/AGO4/CDT1/ACTR2/AURKA/POGZ/SMC1A/PHB2/PEX11B/EDN1/CCNE1/CLASP1/PPP1R9B/RHOA/ZNF207/HECW2/CUL3/CALR/FANCM/TMEM135/KIF2A/KNSTRN/UBE2B/KDR/PDGFB/IL1A/WNT4/PIN1/RB1/KIF3B/NAA50/CCNB1/MKI67/CCSAP/PRKAR1A/VPS4A/RAD50/BUB3/MTFR1/ATM/MTFR1L/HNRNPU/SPIRE1	60
BP	GO:0048017	inositol lipid-mediated signaling	29/1785	184/18670	0.00497627	0.0361307	0.0275179	PIP4K2A/PIK3R1/IGF1R/ZFP36L1/PTEN/UNC5B/MAPK1/CEP55/EZR/EDN1/RHOA/FYN/IRS1/SIRT1/MAZ/PIP5K1A/KDR/PDGFB/OGT/CBL/IRS2/PLEKHA1/HAX1/FLT1/F2R/LYN/ERBB2/EPOR/F2RL1	29
BP	GO:0021700	developmental maturation	41/1785	284/18670	0.00500183	0.0362724	0.0276258	PTK2B/FLVCR1/MECP2/ASCL1/YWHAZ/SNAPIN/RECK/ZBTB7A/SIX3/PAX2/PTEN/CLSTN1/NFASC/RFX3/NR4A2/CDKN1A/APP/MYO5A/UNC13A/AURKA/CLEC7A/RHOA/TFCP2L1/PTBP3/AP3D1/FZD5/VEGFA/CFTR/MAP1B/RB1/CCNB1/PICALM/FOXO3/ID2/B4GALT5/HIF1A/SLC26A3/NOM1/SRRM4/RBPJ/STXBP1	41
BP	GO:0050806	positive regulation of synaptic transmission	27/1785	168/18670	0.00503576	0.0364596	0.0277684	GLUL/PTK2B/MECP2/KIF5B/PTEN/FLOT1/CLSTN1/APP/UNC13A/MAPK1/CREB1/EPHA4/GRIN2A/YTHDF1/CCR2/PRKCE/GRIN2D/RIMS3/SNAP25/LAMA2/CACNG8/SQSTM1/EPHB2/NLGN2/SLC24A2/CRTC1/STXBP1	27
BP	GO:0006626	protein targeting to mitochondrion	18/1785	98/18670	0.00504362	0.0364596	0.0277684	GRPEL2/BAP1/TIMM17A/SREBF2/FZD5/FBXW7/SIAH3/NPEPPS/BAG4/ARIH2/HSP90AA1/DNAJC15/HAX1/PRKAA1/SH3GLB1/SIRT4/LEPROT/HSPA4	18
BP	GO:0061098	positive regulation of protein tyrosine kinase activity	12/1785	55/18670	0.00504592	0.0364596	0.0277684	BDNF/TGFA/EFNA1/FYN/FBXW7/EPHA4/PDGFB/PAK2/WNT3A/ADAM17/NCAPG2/SRCIN1	12
BP	GO:0060977	coronary vasculature morphogenesis	6/1785	18/18670	0.00511701	0.0368843	0.0280919	TGFBR3/TGFBR1/VEGFA/SPRED1/SGCD/NOTCH1	6
BP	GO:1902001	fatty acid transmembrane transport	6/1785	18/18670	0.00511701	0.0368843	0.0280919	MID1IP1/PRKAB2/CPT1A/PRKAA2/IRS2/THBS1	6
BP	GO:0071300	cellular response to retinoic acid	14/1785	69/18670	0.00513293	0.0369324	0.0281284	CYP26B1/PTK2B/RARG/PAX2/ABL2/PHB2/RARA/RARB/CREB1/WNT7B/WNT3A/PCK1/ATM/LYN	14
BP	GO:1902305	regulation of sodium ion transmembrane transport	13/1785	62/18670	0.00514217	0.0369324	0.0281284	KIF5B/ATP1B3/YWHAH/HECW2/DMD/WNK3/KLHL24/PRKCE/GLRX/SCN3B/FXYD2/ARF1/UTRN	13
BP	GO:1905268	negative regulation of chromatin organization	13/1785	62/18670	0.00514217	0.0369324	0.0281284	BCOR/OTUB1/MLLT6/SKI/SET/KDM5A/HMGA1/SIRT1/UBE2B/JARID2/PHF8/ATAD2/MTF2	13
BP	GO:0006650	glycerophospholipid metabolic process	45/1785	319/18670	0.0052336	0.037544	0.0285943	PIP4K2A/SOCS1/PIK3R1/MECP2/LCLAT1/SOCS7/MTMR3/RAB14/PTEN/CPNE3/SMG1/SLC27A1/SOCS5/MTMR4/FGF2/PISD/OSBPL8/GPCPD1/GDE1/IMPAD1/ALDH5A1/PIGG/PIP5K1A/PI4K2B/PDGFB/PLA2G12A/PNPLA6/SOCS6/SLC44A1/SYNJ1/ALOX15/PLEKHA1/CRLS1/CEPT1/FAM126A/PIGS/LPCAT1/ETNK1/IP6K1/MBOAT2/ATM/PCYT1A/ARF1/PAFAH1B1/PLEKHA8	45
BP	GO:0017145	stem cell division	10/1785	42/18670	0.00528774	0.0376136	0.0286473	ZFP36L2/ETV5/RAB10/NCOA3/CUL3/WNT3A/CDK2AP2/DOCK7/NOTCH1/PAFAH1B1	10
BP	GO:0031057	negative regulation of histone modification	10/1785	42/18670	0.00528774	0.0376136	0.0286473	BCOR/OTUB1/MLLT6/SKI/SET/KDM5A/SIRT1/UBE2B/JARID2/MTF2	10
BP	GO:0044088	regulation of vacuole organization	10/1785	42/18670	0.00528774	0.0376136	0.0286473	PIP4K2A/MTMR3/ULK1/LAPTM4B/SMCR8/SCARB2/RALB/RAB1B/RAB3GAP2/SH3GLB1	10
BP	GO:0007043	cell-cell junction assembly	22/1785	129/18670	0.00528842	0.0376136	0.0286473	CTNND1/CLDN1/GJB1/NFASC/RHOC/MPP5/RAB13/PKP1/ROCK2/RHOA/FZD5/CAV1/OCLN/SMAD7/MTDH/CDH12/MYO1C/HIPK1/SNAI2/MARVELD2/ZNF703/PARD6B	22
BP	GO:0001967	suckling behavior	5/1785	13/18670	0.00530609	0.0376136	0.0286473	UBE2Q1/APP/PEX13/UBR3/DACH1	5
BP	GO:0010763	positive regulation of fibroblast migration	5/1785	13/18670	0.00530609	0.0376136	0.0286473	AKAP12/BAG4/PAK3/PRKCE/THBS1	5
BP	GO:0035563	positive regulation of chromatin binding	5/1785	13/18670	0.00530609	0.0376136	0.0286473	MBD2/CDT1/HMBOX1/CTBP2/PYGO2	5
BP	GO:0090594	inflammatory response to wounding	5/1785	13/18670	0.00530609	0.0376136	0.0286473	IL1A/CCR2/SIGLEC10/HIF1A/F2R	5
BP	GO:0099640	axo-dendritic protein transport	5/1785	13/18670	0.00530609	0.0376136	0.0286473	KIF5B/KIF5A/KIF5C/PURA/HNRNPU	5
BP	GO:2000009	negative regulation of protein localization to cell surface	5/1785	13/18670	0.00530609	0.0376136	0.0286473	TAX1BP3/ARF6/GOPC/PICALM/LEPROT	5
BP	GO:0007018	microtubule-based movement	41/1785	285/18670	0.00531739	0.0376491	0.0286744	KPNB1/CLUAP1/NPHP3/SNAPIN/NDEL1/ARHGAP21/KIF21B/KIF5B/SSX2IP/TRAK1/SUN2/RFX3/KIF23/UBB/ACTR2/APP/KIF13A/KIF5A/TNPO1/RAB21/AP3D1/KIF5C/KIF21A/KIF2A/BICD2/MAP1B/PURA/KIF3B/RAB1A/ARL8B/ACTR1A/CCSAP/ARL8A/TTC26/HIF1A/FYCO1/KIF3A/DYNC1LI2/PAFAH1B1/HNRNPU/CCDC65	41
BP	GO:0006979	response to oxidative stress	60/1785	451/18670	0.00541413	0.0382888	0.0291615	PTK2B/CCR7/SESN3/GSKIP/PAX2/SLC25A24/ETS1/GCH1/ATP2A2/ETV5/NR4A2/PPP1R15B/OXR1/APP/NONO/IPCEF1/JUN/MAPK1/CAMKK2/MTF1/EDN1/ARNTL/SP1/ADAM9/PRKAA2/FYN/PRKCD/SIRT1/TP53/EZH2/FOS/FBXW7/REST/TXNIP/BAK1/GATA4/PPP2CB/UBQLN1/RHOB/SESN2/PLEKHA1/FOXO3/ALDH3B1/KDM6B/SLC7A11/ZNF622/TP53INP1/PRKAA1/PAWR/HIF1A/PCNA/BTG1/CASP3/MAPK8/NFE2L2/CYGB/FOXO1/FXN/CPEB2/TLR4	60
BP	GO:0000077	DNA damage checkpoint	24/1785	145/18670	0.00544017	0.0384276	0.0292673	DDX39B/WAC/MDM4/TAOK1/CLOCK/ZNF385A/HMGA2/CHEK1/CDKN1A/AURKA/CNOT6L/CASP2/BTG2/TP53/CCND1/TFDP2/CARM1/E2F7/RFWD3/FOXN3/CCNB1/PCNA/ATM/CLSPN	24
BP	GO:0048144	fibroblast proliferation	16/1785	84/18670	0.00553093	0.0389962	0.0297003	CDK6/SKI/CDKN1A/JUN/MORC3/FN1/TP53/CREB1/PDGFB/WNT7B/CCNB1/FTH1/DACH1/TP53INP1/PAWR/MYC	16
BP	GO:0043523	regulation of neuron apoptotic process	32/1785	210/18670	0.00553369	0.0389962	0.0297003	CDC34/PTK2B/MECP2/SIX4/ASCL1/PDPK1/BDNF/EN2/UNC5B/NR4A2/OXR1/SET/NONO/JUN/CASP2/BTG2/RHOA/FYN/TP53/FBXW7/PAK3/KRAS/PIN1/FOXO3/HIF1A/F2R/ATM/GFRAL/CASP3/HYOU1/CHL1/STXBP1	32
BP	GO:0051817	modulation of process of other organism involved in symbiotic interaction	18/1785	99/18670	0.0056272	0.0396086	0.0301667	KPNA2/KPNB1/KPNA1/IGF2R/HMGA2/NUCKS1/CCNK/JUN/ULK1/TFAP4/KPNA6/PABPN1/SP1/TBC1D20/REST/SMAD3/RXRA/CCNT1	18
BP	GO:0009746	response to hexose	31/1785	202/18670	0.00563401	0.03961	0.0301678	GLUL/PTK2B/IGF1R/PAX2/EPHA5/NKX2-2/KIF5B/PTEN/RHOA/NEUROD1/PRKAA2/TCF7L2/TXNIP/CFTR/GATA4/RAB11FIP2/IRS2/PRKCE/KCNJ11/VSNL1/SESN2/RFX6/FOXO3/SIDT2/THBS1/NAMPT/PCK1/PRKAA1/HIF1A/TGFBR2/CASP3	31
BP	GO:2001238	positive regulation of extrinsic apoptotic signaling pathway	11/1785	49/18670	0.00567868	0.0398773	0.0303713	CYLD/PTEN/SKIL/CAV1/PMAIP1/PAK2/ITM2C/STK4/THBS1/ATF3/TIMP3	11
BP	GO:0090218	positive regulation of lipid kinase activity	9/1785	36/18670	0.00568619	0.0398832	0.0303759	PTK2B/CCR7/ATG14/FGF2/VAV3/IRS1/PDGFB/FLT1/LYN	9
BP	GO:0048332	mesoderm morphogenesis	15/1785	77/18670	0.00572559	0.0401126	0.0305506	PAX2/HMGA2/ITGB1/HAND1/ITGB3/SMAD3/ITGA3/ITGA2/SIX2/ACVR1/WNT3A/SMAD1/KDM6B/NF2/PRKAR1A	15
BP	GO:0051896	regulation of protein kinase B signaling	36/1785	244/18670	0.00578397	0.0402685	0.0306693	PIK3R1/CCR7/SESN3/IGF1R/TRAT1/TGFA/PTEN/HIP1/TGFBR1/PDCD6/ITGB1/FGF2/OSBPL8/FYN/RNF41/IRS1/SIRT1/MAZ/PHLPP2/BAG4/TCF7L2/FRS2/TRIB3/PDGFB/GATA4/HSP90AA1/MTDH/IRS2/PLEKHA1/THBS1/HAX1/RICTOR/GFRAL/PTPRJ/ERBB2/FGF9	36
BP	GO:0001783	B cell apoptotic process	7/1785	24/18670	0.00580162	0.0402685	0.0306693	TNFRSF21/PTEN/FNIP1/BAK1/CRKL/IRS2/LYN	7
BP	GO:0003272	endocardial cushion formation	7/1785	24/18670	0.00580162	0.0402685	0.0306693	TGFBR1/TMEM100/ACVR1/SNAI2/TGFBR2/NOTCH1/RBPJ	7
BP	GO:0010288	response to lead ion	7/1785	24/18670	0.00580162	0.0402685	0.0306693	CLDN1/APP/CPOX/DNMT3A/PPP2CB/PPP2CA/ANXA5	7
BP	GO:0010640	regulation of platelet-derived growth factor receptor signaling pathway	7/1785	24/18670	0.00580162	0.0402685	0.0306693	PTPN12/HIP1/LOX/CBL/MYOCD/LRIG2/PTPRJ	7
BP	GO:0022616	DNA strand elongation	7/1785	24/18670	0.00580162	0.0402685	0.0306693	NUCKS1/POLD3/MCM7/DNA2/MCM4/RAD50/PCNA	7
BP	GO:0046426	negative regulation of receptor signaling pathway via JAK-STAT	7/1785	24/18670	0.00580162	0.0402685	0.0306693	SOCS1/BCL3/NEUROD1/CAV1/NF2/PPP2CA/LEPROT	7
BP	GO:1903649	regulation of cytoplasmic transport	7/1785	24/18670	0.00580162	0.0402685	0.0306693	MAPK1/SNX12/EZR/MAP2K1/RAB21/RDX/MSN	7
BP	GO:0007059	chromosome segregation	45/1785	321/18670	0.00586492	0.0406392	0.0309517	KPNB1/RRS1/AXIN2/NDEL1/KLHDC8B/PHF13/TTN/ZWINT/ESPL1/RIOK3/PDS5A/PUM2/CDC27/KIF23/AGO4/CDT1/ACTR2/POGZ/SMC1A/PHB2/SMARCAD1/CCNE1/ZNF207/HECW2/NR3C1/CUL3/FANCM/FBXW7/KNSTRN/UBE2B/RB1/CENPQ/NAA50/ARL8B/CCNB1/MKI67/TLK1/DDX3X/RCC2/ARL8A/VPS4A/BUB3/ATM/HNRNPU/PUM1	45
BP	GO:0022406	membrane docking	28/1785	178/18670	0.0058686	0.0406392	0.0309517	CEP135/ATG14/TUBB4A/TMEM67/STX17/CC2D2A/RAB10/UNC13A/YWHAE/EZR/CLASP1/STX16/MAPRE1/RALB/CFTR/STXBP3/CTBP2/HSP90AA1/STX6/ACTR1A/SNAP25/VPS33A/HAUS3/VAMP8/RAB15/PAFAH1B1/MSN/STXBP1	28
BP	GO:0001844	protein insertion into mitochondrial membrane involved in apoptotic signaling pathway	8/1785	30/18670	0.00590994	0.0407841	0.031062	YWHAZ/YWHAH/YWHAQ/YWHAE/TP53/TFDP2/PMAIP1/MAPK8	8
BP	GO:0048147	negative regulation of fibroblast proliferation	8/1785	30/18670	0.00590994	0.0407841	0.031062	SKI/MORC3/TP53/FTH1/DACH1/TP53INP1/PAWR/MYC	8
BP	GO:1904837	beta-catenin-TCF complex assembly	8/1785	30/18670	0.00590994	0.0407841	0.031062	AXIN2/KMT2D/BCL9/BCL9L/TCF7L2/TLE4/MYC/PYGO2	8
BP	GO:0045833	negative regulation of lipid metabolic process	17/1785	92/18670	0.00593545	0.0408682	0.0311261	SIK1/SLC27A1/ORMDL2/SIRT1/FBXW7/REST/TRIB3/PDGFB/WNT4/SNAI2/INSIG1/LPCAT1/PRKAA1/SIRT4/BSCL2/ATP1A1/WDTC1	17
BP	GO:0042542	response to hydrogen peroxide	24/1785	146/18670	0.00593579	0.0408682	0.0311261	PTK2B/PAX2/ETS1/PPP1R15B/JUN/ADAM9/FYN/PRKCD/SIRT1/EZH2/TXNIP/BAK1/PPP2CB/RHOB/PLEKHA1/FOXO3/KDM6B/PRKAA1/PAWR/PCNA/CASP3/NFE2L2/FOXO1/FXN	24
BP	GO:0031960	response to corticosteroid	26/1785	162/18670	0.0059469	0.0408978	0.0311486	ZFP36L1/ZFP36L2/CLDN1/CREBRF/FBXO32/CDKN1A/TFAP4/EDN1/RHOA/DDIT4/ADAM9/NR3C1/FOS/CCND1/REST/KRAS/WNT7B/SLIT2/ATP2B1/FOXO3/PCK1/PCNA/CASP3/NOTCH1/HNRNPU/FOXO1	26
BP	GO:0045765	regulation of angiogenesis	52/1785	383/18670	0.00618357	0.0424766	0.032351	AGO1/GLUL/PTK2B/MECP2/CCBE1/RECK/PDPK1/EPN1/ETS1/MAP2K5/PDCD6/HMGA2/EFNA1/ITGB1/AMOT/FOXJ2/FGF2/GATA6/MAP3K3/SP1/PLXND1/ROCK2/RHOA/SEMA6A/PTPRM/SIRT1/FBXW7/KDR/ADAMTS9/VEGFA/EPHA1/IL1A/GATA4/RHOB/CARD10/MTDH/CCR2/AKT3/SPRED1/HIPK1/SMAD1/E2F2/THBS1/FLT1/HIF1A/BTG1/TGFBR2/NOTCH1/ERBB2/NFE2L2/SYNJ2BP/NGFR	52
BP	GO:0046883	regulation of hormone secretion	38/1785	262/18670	0.00620804	0.0425958	0.0324418	GLUL/CACNA1C/EPHA5/RASL10B/SYT7/KIF5B/CPT1A/CACNA2D2/SERP1/CLOCK/RFX3/EDN1/ARNTL/NEUROD1/IRS1/RAB11FIP1/CREB1/TCF7L2/SLC16A1/REST/CFTR/HFE/IRS2/PRKCE/KCNJ11/VSNL1/RFX6/SLC2A1/SIDT2/AIMP1/SNAP25/HIF1A/MIDN/VAMP8/ANXA5/TMF1/SIRT4/NLGN2	38
BP	GO:0002028	regulation of sodium ion transport	16/1785	85/18670	0.00622366	0.0426541	0.0324862	KIF5B/MLLT6/ATP1B3/SIK1/YWHAH/HECW2/DMD/WNK3/KLHL24/PRKCE/GLRX/SCN3B/FXYD2/ARF1/UTRN/ATP1A1	16
BP	GO:0002062	chondrocyte differentiation	21/1785	123/18670	0.00625449	0.0428165	0.0326099	AXIN2/RARG/TGFBR1/HMGA2/GLG1/RUNX3/MEF2D/RARB/IMPAD1/GLI2/CHSY1/SMAD3/TRPS1/SIX2/SNAI2/NFIB/COCH/LOXL2/CREB3L2/TGFBR2/FGF9	21
BP	GO:0001953	negative regulation of cell-matrix adhesion	10/1785	43/18670	0.00631199	0.0430135	0.0327599	PIK3R1/PTEN/ACER2/CASK/CORO1C/DLC1/THBS1/NF2/RCC2/JAG1	10
BP	GO:0006904	vesicle docking involved in exocytosis	10/1785	43/18670	0.00631199	0.0430135	0.0327599	RAB10/UNC13A/RALB/CFTR/STXBP3/CTBP2/SNAP25/VPS33A/RAB15/STXBP1	10
BP	GO:0060612	adipose tissue development	10/1785	43/18670	0.00631199	0.0430135	0.0327599	SH3PXD2B/ARRDC3/UBB/AMER1/TBL1XR1/SIRT1/SPTLC2/ID2/CSF1/SLC25A25	10
BP	GO:0071364	cellular response to epidermal growth factor stimulus	10/1785	43/18670	0.00631199	0.0430135	0.0327599	PDPK1/PAX2/ZFP36L1/ZFP36L2/PTPN12/MCM7/BAG4/CBL/SNAI2/ERBB2	10
BP	GO:0035304	regulation of protein dephosphorylation	23/1785	139/18670	0.0064338	0.0437937	0.0333542	PPP1R1A/ARPP19/PPP1R3B/HSP90B1/SHOC2/PPP1R11/PPP1R15B/SET/YWHAE/PPP6R1/PPP1R9B/ROCK2/PRKCD/CRY2/PPP1R12A/DLC1/PIN1/FKBP1A/PHACTR4/CALM1/PPP2R5E/PTBP1/PPP2R2A	23
BP	GO:0099173	postsynapse organization	26/1785	163/18670	0.00644934	0.0438424	0.0333912	IGF1R/CAPRIN2/PTEN/CHRNB1/ETV5/EFNA1/ACTR2/CAPRIN1/SPTBN2/ARF6/FYN/EPHA4/PAK3/RER1/ITGA3/CRKL/SLC7A11/PTPRD/SIPA1L1/WASL/ARF1/FRMPD4/EPHB2/PAFAH1B1/NLGN2/SRCIN1	26
BP	GO:0010212	response to ionizing radiation	24/1785	147/18670	0.00646815	0.0438424	0.0333912	CLOCK/HMGA2/CDKN1A/NUCKS1/XRCC6/DCUN1D3/SIRT1/TP53/INIP/CCND1/TMEM109/BAK1/DNMT3A/CBL/RHOB/RFWD3/LZIC/SNAI2/NAMPT/PRKAA1/MYC/RAD51AP1/ATM/CASP3	24
BP	GO:0071236	cellular response to antibiotic	24/1785	147/18670	0.00646815	0.0438424	0.0333912	PAX2/ETS1/PTEN/ADCY6/ACTR2/PRKCD/SIRT1/TP53/EZH2/CFTR/PDGFB/DNMT3A/RHOB/PRKCE/PLEKHA1/FOXO3/KDM6B/TP53INP1/PRKAA1/PAWR/PCNA/NFE2L2/FOXO1/FXN	24
BP	GO:0031016	pancreas development	15/1785	78/18670	0.00647755	0.0438424	0.0333912	NPHP3/PDPK1/CDK6/NKX2-2/CLOCK/RFX3/GATA6/ARNTL/NEUROD1/TCF7L2/ONECUT2/BAK1/RFX6/SIDT2/FOXO1	15
BP	GO:0072332	intrinsic apoptotic signaling pathway by p53 class mediator	15/1785	78/18670	0.00647755	0.0438424	0.0333912	BCL2L12/BCL3/ZNF385A/UBB/CDKN1A/DDIT4/SIRT1/TP53/TMEM109/PERP/PMAIP1/DDX5/TAF9B/HIPK1/E2F2	15
BP	GO:0006006	glucose metabolic process	31/1785	204/18670	0.00650651	0.0439391	0.0334649	ARPP19/PPP1R3B/CPT1A/NCOA2/CRTC2/EPM2AIP1/SIK1/SERP1/PFKP/NLN/IRS1/ALDH5A1/SIRT1/TP53/OGT/PMAIP1/PDK4/RANBP2/IRS2/RORA/KCNJ11/SESN2/ATF3/PCK1/PRKAA1/FOXK1/MIDN/FAM3C/FOXO1/FOXK2/WDTC1	31
BP	GO:0031396	regulation of protein ubiquitination	31/1785	204/18670	0.00650651	0.0439391	0.0334649	SKP2/RNF111/N4BP1/OTUB1/PTEN/TGFBR1/PDCD6/ARRDC3/UBB/TRIM44/AMER1/DNAJA1/TRAF6/DCUN1D3/FYN/CUL3/FANCM/FBXW7/NXN/TRIB3/OGT/CAV1/PIN1/FKBP1A/RAB1A/UBQLN1/HSP90AA1/SMAD7/PRKCE/UBXN2A/FOXF2	31
BP	GO:0006275	regulation of DNA replication	19/1785	108/18670	0.00652545	0.0439697	0.0334882	S100A11/PDS5A/SLFN11/CDT1/NUCKS1/JUN/SMC1A/RFC5/TP53/FBXW7/USP37/DNA2/E2F7/RBBP6/GLI2/TNFAIP1/PPP2CA/DACH1/PCNA	19
BP	GO:2000146	negative regulation of cell motility	48/1785	349/18670	0.00652572	0.0439697	0.0334882	HMGB1/MECP2/RECK/IDH2/MITF/MAP2K5/PTEN/CLIC4/FGF2/CD200R1/NR2F2/OSBPL8/CLASP1/RHOA/RNF41/PTPRM/CALR/COL3A1/CORO1C/RAP2C/ADAMTS9/DLC1/EPHA1/WNT4/PIN1/DDT/SMAD7/RHOB/CARD10/SLIT2/FOXO3/SPRED1/THBS1/NF2/JAG1/DACH1/TP53INP1/MYOCD/WASL/SEMA6D/PTPRJ/NOTCH1/NFE2L2/CYGB/BCR/CITED2/SYNJ2BP/GPR173	48
BP	GO:0022407	regulation of cell-cell adhesion	54/1785	402/18670	0.00662529	0.0444894	0.033884	MINK1/SOCS1/HMGB1/PIK3R1/CCR7/TNFRSF21/PDPK1/HAS2/ETS1/CYLD/NFAT5/MAP2K5/FLOT1/SOCS5/RUNX3/RARA/MYO10/TRAF6/RHOA/FYN/PRKCD/AP3D1/PAG1/PAK3/VEGFA/BTLA/RDX/GLI2/CAV1/WNT4/HFE/PAK2/EFNB1/PODXL/PPM1F/SOCS6/SMAD7/CCR2/ALOX15/WNT3A/PDPN/NF2/PRKAR1A/JAG1/CD3E/PAWR/CELSR2/LYN/TGFBR2/CASP3/ERBB2/ZNF703/ZC3H8/CITED2	54
BP	GO:0010389	regulation of G2/M transition of mitotic cell cycle	30/1785	196/18670	0.00663014	0.0444894	0.033884	MECP2/PSMD3/CEP135/TAOK1/PSME3/HMGA2/TUBB4A/APP/AURKA/CDC25A/YWHAE/CLASP1/CCND1/MAPRE1/PHOX2B/HSP90AA1/PSMA2/FBXL7/FOXN3/CCNB1/ACTR1A/BRD4/PSMA7/RCC2/VPS4A/HAUS3/ATM/PSMF1/CLSPN/PAFAH1B1	30
BP	GO:0036473	cell death in response to oxidative stress	17/1785	93/18670	0.00663256	0.0444894	0.033884	GSKIP/OXR1/NONO/FYN/PRKCD/SIRT1/FBXW7/REST/GATA4/UBQLN1/FOXO3/SLC7A11/ZNF622/PAWR/HIF1A/NFE2L2/TLR4	17
BP	GO:1901655	cellular response to ketone	17/1785	93/18670	0.00663256	0.0444894	0.033884	ADCY6/FBXO32/TFAP4/ROCK2/DDIT4/PRKAA2/NR3C1/SIRT1/CFTR/PRKCE/ATP2B1/FOXO3/PCK1/PRKAA1/NDOR1/MSN/FOXO1	17
BP	GO:0014009	glial cell proliferation	11/1785	50/18670	0.00666528	0.0446589	0.0340131	PTK2B/IDH2/SKI/ETV5/DICER1/PLAG1/CREB1/NF2/CSF1/LYN/NOTCH1	11
BP	GO:0036498	IRE1-mediated unfolded protein response	13/1785	64/18670	0.00679992	0.045324	0.0345197	GFPT1/PARP16/KLHDC3/SERP1/SSR1/HDGF/DNAJB9/TMEM33/PDIA6/BAK1/EXTL3/CTDSP2/HYOU1	13
BP	GO:0043297	apical junction assembly	13/1785	64/18670	0.00679992	0.045324	0.0345197	CLDN1/RHOC/MPP5/RAB13/ROCK2/RHOA/FZD5/OCLN/MTDH/MYO1C/SNAI2/MARVELD2/PARD6B	13
BP	GO:0046834	lipid phosphorylation	13/1785	64/18670	0.00679992	0.045324	0.0345197	PIP4K2A/SOCS1/PIK3R1/SOCS7/SMG1/SOCS5/IMPAD1/PIP5K1A/PI4K2B/SOCS6/FAM126A/IP6K1/CERK	13
BP	GO:0048278	vesicle docking	13/1785	64/18670	0.00679992	0.045324	0.0345197	STX17/RAB10/UNC13A/STX16/RALB/CFTR/STXBP3/CTBP2/STX6/SNAP25/VPS33A/RAB15/STXBP1	13
BP	GO:0043525	positive regulation of neuron apoptotic process	12/1785	57/18670	0.00680995	0.045324	0.0345197	CDC34/ASCL1/JUN/CASP2/RHOA/TP53/FBXW7/PAK3/PIN1/FOXO3/ATM/CASP3	12
BP	GO:0071398	cellular response to fatty acid	12/1785	57/18670	0.00680995	0.045324	0.0345197	CPT1A/CLDN1/ADCY6/SMARCD1/EDN1/PRKAA2/IRS1/CREB1/PDK4/PRKCE/CCNB1/PRKAA1	12
BP	GO:0014066	regulation of phosphatidylinositol 3-kinase signaling	21/1785	124/18670	0.00686936	0.0456529	0.0347702	PIP4K2A/PIK3R1/IGF1R/PTEN/UNC5B/MAPK1/CEP55/FYN/SIRT1/MAZ/PIP5K1A/KDR/PDGFB/CBL/IRS2/HAX1/FLT1/F2R/LYN/EPOR/F2RL1	21
BP	GO:0034063	stress granule assembly	6/1785	19/18670	0.00688223	0.0456529	0.0347702	PUM2/G3BP2/PRKAA2/DDX3X/PRKAA1/G3BP1	6
BP	GO:0034138	toll-like receptor 3 signaling pathway	6/1785	19/18670	0.00688223	0.0456529	0.0347702	TIRAP/FLOT1/CAV1/UBQLN1/TNIP2/F2RL1	6
BP	GO:0006890	retrograde vesicle-mediated transport, Golgi to endoplasmic reticulum	16/1785	86/18670	0.00698476	0.0462306	0.0352102	RAB6C/TMED10/KIF23/KIF5A/TMED7/KIF2A/SURF4/BICD2/KDELR1/RAB1B/ERGIC1/KIF3B/RAB1A/RER1/KIF3A/ARFGAP2	16
BP	GO:0070542	response to fatty acid	16/1785	86/18670	0.00698476	0.0462306	0.0352102	CCR7/TGFBR3/CPT1A/CLDN1/ADCY6/SMARCD1/SCD/EDN1/PRKAA2/IRS1/CREB1/PDK4/PRKCE/CCNB1/YY1/PRKAA1	16
BP	GO:0006644	phospholipid metabolic process	57/1785	430/18670	0.00708621	0.0468503	0.0356822	PIP4K2A/SOCS1/PTK2B/PIK3R1/MECP2/CCR7/LCLAT1/SOCS7/MTMR3/RAB14/ATG14/PTEN/CPNE3/SMG1/SLC27A1/SOCS5/MTMR4/FGF2/PISD/GATA6/OSBPL8/VAV3/GPCPD1/GDE1/IMPAD1/PRKCD/IRS1/ALDH5A1/PIGG/PIP5K1A/PI4K2B/SPTLC2/PDGFB/PLA2G12A/PNPLA6/SOCS6/SLC44A1/SYNJ1/ALOX15/PLEKHA1/CRLS1/CEPT1/FAM126A/FLT1/PIGS/LPCAT1/ETNK1/IP6K1/MBOAT2/ATM/LYN/PCYT1A/ARF1/PAFAH1B1/PLEKHA8/SPTLC1/WDR81	57
BP	GO:0009749	response to glucose	30/1785	197/18670	0.00712575	0.0470598	0.0358417	GLUL/PTK2B/IGF1R/PAX2/EPHA5/NKX2-2/KIF5B/PTEN/RHOA/NEUROD1/PRKAA2/TCF7L2/TXNIP/CFTR/GATA4/RAB11FIP2/IRS2/PRKCE/KCNJ11/VSNL1/SESN2/RFX6/FOXO3/SIDT2/THBS1/PCK1/PRKAA1/HIF1A/TGFBR2/CASP3	30
BP	GO:0030193	regulation of blood coagulation	15/1785	79/18670	0.00730675	0.0479644	0.0365306	EDN1/TFPI/PROS1/PRKCD/PDGFB/CAV1/PDPN/THBS1/VKORC1/F2R/ANXA5/LYN/NFE2L2/F2RL1/TLR4	15
BP	GO:0045913	positive regulation of carbohydrate metabolic process	15/1785	79/18670	0.00730675	0.0479644	0.0365306	ARPP19/HAS2/EPM2AIP1/APP/PRKAA2/IRS1/SIRT1/PDGFB/PMAIP1/RANBP2/IRS2/PRKCE/PRKAA1/HIF1A/FOXO1	15
BP	GO:0010165	response to X-ray	8/1785	31/18670	0.00731076	0.0479644	0.0365306	HMGA2/CDKN1A/NUCKS1/XRCC6/TP53/CCND1/ATM/CASP3	8
BP	GO:0034694	response to prostaglandin	8/1785	31/18670	0.00731076	0.0479644	0.0365306	CCR7/TGFBR3/ADCY6/EDN1/PRKAA2/PRKCE/YY1/PRKAA1	8
BP	GO:0044319	wound healing, spreading of cells	8/1785	31/18670	0.00731076	0.0479644	0.0365306	PTEN/RHOC/RREB1/CLASP1/RHOA/PDPN/CD151/ADAM17	8
BP	GO:0090505	epiboly involved in wound healing	8/1785	31/18670	0.00731076	0.0479644	0.0365306	PTEN/RHOC/RREB1/CLASP1/RHOA/PDPN/CD151/ADAM17	8
BP	GO:0009648	photoperiodism	7/1785	25/18670	0.00740427	0.0484717	0.036917	FBXL3/SIK1/CLOCK/CRY2/TP53/ID2/CRTC1	7
BP	GO:0051894	positive regulation of focal adhesion assembly	7/1785	25/18670	0.00740427	0.0484717	0.036917	LIMS1/KDR/VEGFA/WNT4/SMAD3/PPM1F/PTPRJ	7
BP	GO:0003197	endocardial cushion development	10/1785	44/18670	0.00748393	0.048833	0.0371922	MDM4/TGFBR1/TMEM100/GATA4/ACVR1/SNAI2/JAG1/TGFBR2/NOTCH1/RBPJ	10
BP	GO:0061001	regulation of dendritic spine morphogenesis	10/1785	44/18670	0.00748393	0.048833	0.0371922	CAPRIN2/PTEN/EFNA1/ACTR2/CAPRIN1/EPHA4/PAK3/SIPA1L1/PAFAH1B1/SRCIN1	10
BP	GO:1901028	regulation of mitochondrial outer membrane permeabilization involved in apoptotic signaling pathway	10/1785	44/18670	0.00748393	0.048833	0.0371922	YWHAZ/YWHAH/YWHAQ/YWHAE/SLC35F6/TP53/TFDP2/BAK1/PMAIP1/MAPK8	10
BP	GO:0035019	somatic stem cell population maintenance	14/1785	72/18670	0.00757877	0.0489332	0.0372685	PAX2/ZFP36L2/SKI/SALL1/POLR2F/FGF2/BCL9/BCL9L/REST/EPHA1/SIX2/SALL4/KLF10/RBPJ	14
BP	GO:0038034	signal transduction in absence of ligand	14/1785	72/18670	0.00757877	0.0489332	0.0372685	MKNK2/MAP2K5/UNC5B/DCC/CASP2/STRADB/FYN/BAK1/IL1A/FOXO3/SNAI2/APPL1/GFRAL/CASP3	14
BP	GO:0061035	regulation of cartilage development	14/1785	72/18670	0.00757877	0.0489332	0.0372685	AXIN2/RARG/TGFBR1/GLG1/RARA/RARB/CARM1/GLI2/SMAD3/TRPS1/SIX2/SMAD1/SNAI2/LOXL2	14
BP	GO:0097192	extrinsic apoptotic signaling pathway in absence of ligand	14/1785	72/18670	0.00757877	0.0489332	0.0372685	MKNK2/MAP2K5/UNC5B/DCC/CASP2/STRADB/FYN/BAK1/IL1A/FOXO3/SNAI2/APPL1/GFRAL/CASP3	14
BP	GO:0009214	cyclic nucleotide catabolic process	5/1785	14/18670	0.00761147	0.0489332	0.0372685	PDE7B/PDE4C/PDE4A/PDE4D/PDE10A	5
BP	GO:0010248	establishment or maintenance of transmembrane electrochemical gradient	5/1785	14/18670	0.00761147	0.0489332	0.0372685	ATP1B3/BAK1/ATP1A3/FXYD2/ATP1A1	5
BP	GO:0021535	cell migration in hindbrain	5/1785	14/18670	0.00761147	0.0489332	0.0372685	PLXNA2/ITGB1/SEMA4C/PHOX2B/RBFOX2	5
BP	GO:0035791	platelet-derived growth factor receptor-beta signaling pathway	5/1785	14/18670	0.00761147	0.0489332	0.0372685	PTPN12/HIP1/LOX/PDGFB/MYOCD	5
BP	GO:0043922	negative regulation by host of viral transcription	5/1785	14/18670	0.00761147	0.0489332	0.0372685	HMGA2/NUCKS1/JUN/TFAP4/REST	5
BP	GO:0044090	positive regulation of vacuole organization	5/1785	14/18670	0.00761147	0.0489332	0.0372685	PIP4K2A/ULK1/RALB/RAB3GAP2/SH3GLB1	5
BP	GO:0051547	regulation of keratinocyte migration	5/1785	14/18670	0.00761147	0.0489332	0.0372685	HAS2/PTEN/ARF6/MAPRE2/ADAM9	5
BP	GO:0060211	regulation of nuclear-transcribed mRNA poly(A) tail shortening	5/1785	14/18670	0.00761147	0.0489332	0.0372685	PABPC1/CPEB3/BTG2/TNRC6A/TNRC6B	5
BP	GO:0071361	cellular response to ethanol	5/1785	14/18670	0.00761147	0.0489332	0.0372685	PTEN/DNMT3A/PRKCE/TP53INP1/PRKAA1	5
BP	GO:0034401	chromatin organization involved in regulation of transcription	22/1785	133/18670	0.00761364	0.0489332	0.0372685	HMGB1/MECP2/ARID1A/KMT2D/MBD2/HMGA2/CHEK1/SMARCD1/EZH1/HMGA1/SIRT1/EZH2/BAZ2A/MTHFR/DNMT3A/PPM1D/SMARCA5/PHF8/ATAD2/MIER1/MORF4L2/SIRT4	22
BP	GO:0031103	axon regeneration	11/1785	51/18670	0.00778104	0.049902	0.0380063	NDEL1/PTEN/RTN4R/RTN4RL1/JUN/MAP2K1/EPHA4/MAP1B/FOLR1/KREMEN1/LRIG2	11
BP	GO:0051496	positive regulation of stress fiber assembly	11/1785	51/18670	0.00778104	0.049902	0.0380063	SH3PXD2B/TGFBR1/RHOC/ROCK2/RHOA/BAG4/EPHA1/WNT4/SMAD3/PPM1F/NF2	11
CC	GO:0005667	transcription regulator complex	94/1837	415/19717	2.23837e-16	1.55343e-13	1.15217e-13	NR6A1/CHD4/HMGB1/RARG/SIX4/ASCL1/ZBTB7A/SIX3/E2F5/CBX5/ETS1/NFAT5/HOXA10/ZEB1/CD3EAP/HOXA9/SKI/CLOCK/PBX3/RFX3/NR4A2/E2F6/HDGF/NONO/HAND1/JUN/RUNX3/BCL9/GATA6/RARA/TAF8/TFAP4/BCL9L/RBL1/PHF12/TBL1XR1/XRCC6/ATF6B/LIN9/RARB/ARNTL/GTF2E2/SP1/HMGA1/GATAD2B/NEUROD1/RBPJL/E2F3/TP53/FOS/CCND1/CREB1/TFDP2/CARM1/E2F7/MAX/TCF7L2/REST/TLE4/RB1/SMAD3/GATA4/TBPL1/CTBP2/SMAD7/SIX2/RXRB/MED17/TAF9B/RXRA/NAA15/S…	94
CC	GO:0030055	cell-substrate junction	84/1837	412/19717	4.03691e-12	9.46034e-10	7.01669e-10	PTK2B/YWHAZ/NHS/PDPK1/LPP/PABPC1/FLOT1/PTPN12/CPNE3/HSP90B1/AKAP12/NFASC/LIMS1/IGF2R/SYNPO2/KIF23/TWF1/SENP1/ITGB1/ACTR2/RAB10/RND3/MAPK1/CASK/YWHAQ/YWHAE/ITGB3/EZR/ARF6/IRF2/CLASP1/MAPRE2/HMGA1/RHOA/STX16/MARCKS/FERMT2/ADAM9/SCARB2/MAP2K1/RRAS2/RAB21/PRKAR2A/CALR/LIMA1/CORO1C/MAPRE1/PPP1R12A/FZD2/PIP5K1A/TES/CSRP1/KRAS/RDX/DLC1/CAV1/MPRIP/DMD/RPL30/CBL/NPM1/ITGA3/RHOB/ITGA2/LAYN/VIM/CD151/MTF2/F…	84
CC	GO:0005925	focal adhesion	83/1837	405/19717	4.08948e-12	9.46034e-10	7.01669e-10	PTK2B/YWHAZ/NHS/PDPK1/LPP/PABPC1/FLOT1/PTPN12/CPNE3/HSP90B1/AKAP12/NFASC/LIMS1/IGF2R/SYNPO2/KIF23/TWF1/SENP1/ITGB1/ACTR2/RAB10/RND3/MAPK1/CASK/YWHAQ/YWHAE/ITGB3/EZR/ARF6/IRF2/CLASP1/MAPRE2/HMGA1/RHOA/STX16/MARCKS/FERMT2/ADAM9/SCARB2/MAP2K1/RRAS2/RAB21/PRKAR2A/CALR/LIMA1/CORO1C/MAPRE1/PPP1R12A/FZD2/PIP5K1A/TES/CSRP1/KRAS/RDX/DLC1/CAV1/MPRIP/RPL30/CBL/NPM1/ITGA3/RHOB/ITGA2/LAYN/VIM/CD151/MTF2/FLT1/…	83
CC	GO:0090575	RNA polymerase II transcription regulator complex	45/1837	166/19717	2.94008e-11	5.10104e-09	3.78342e-09	RARG/ASCL1/E2F5/E2F6/NONO/HAND1/JUN/RUNX3/BCL9/RARA/TAF8/BCL9L/ATF6B/RARB/GTF2E2/HMGA1/NEUROD1/E2F3/TP53/FOS/CREB1/TFDP2/CARM1/E2F7/MAX/TCF7L2/TLE4/RB1/SMAD3/GATA4/TBPL1/RXRB/MED17/TAF9B/RXRA/GTF2H1/E2F2/POU2F1/HIF1A/PYGO2/GTF2H3/HNRNPAB/MED8/HNRNPU/THRB	45
CC	GO:1902911	protein kinase complex	33/1837	109/19717	5.60179e-10	7.77529e-08	5.7669e-08	CCNF/IGF1R/ZBTB7A/PRKAB2/CDK6/CAB39/SIK1/TGFBR1/ACVR2A/CDKN1A/CCNK/ULK1/CCND2/CCNE1/SMCR8/PRKAA2/CCNT2/IRS1/PRKAR2A/PHKA1/CCNY/CCND1/RB1/ACVR1/CCNB1/SESN2/GTF2H1/PRKAR1A/PRKAA1/CCNT1/CCNJ/PCNA/GTF2H3	33
CC	GO:0000151	ubiquitin ligase complex	57/1837	282/19717	1.58561e-08	1.83402e-06	1.36029e-06	ARIH1/DDA1/KLHL21/CCNF/ANAPC13/ANAPC16/SKP2/PHC3/FBXL3/PCGF3/BCOR/FBXL20/KLHL15/FBXL13/PDCD6/FBXO32/UBE2V1/CDC27/DCAF17/CBX2/BTRC/WWP2/BRAP/KCTD2/FBXW8/RNF2/DCUN1D3/CUL3/FBXW7/SPOP/UBE2B/UBR3/CBX4/DCAF10/ARIH2/UBE4B/DCAF16/WDR26/TNFAIP1/KLHL12/KLHL24/FBXL7/UBE2D2/ENC1/ANAPC7/FBXO11/PLRG1/RNF14/FBXL17/UBE2A/CUL2/DCAF7/CBX7/ZER1/KLHL25/UBE4A/FBXL18	57
CC	GO:0000790	nuclear chromatin	68/1837	376/19717	7.22934e-08	7.16737e-06	5.31601e-06	CHD4/HMGB1/RARG/ARID1A/SMARCE1/ZBTB7A/CBX5/HMGB3/EN2/GABPA/KLHDC3/MBD2/RFX3/SMARCC1/ZNF385A/MIXL1/HMGB2/SUZ12/SMARCD1/NUCKS1/NACC2/JUN/POGZ/RUNX3/RARA/MXD1/PHF12/MEF2D/DPF1/SP1/GATAD2B/RNF2/NCOA3/SETD1A/SIRT1/TP53/EZH2/CREB1/MAX/ASXL1/TCF7L2/UBE2B/UHRF2/DNMT3A/RB1/SMAD3/PHOX2B/HMGXB4/TRPS1/SMARCA5/RXRA/SNAI2/HNRNPC/DPF2/YY1/RAD50/MYOCD/PAWR/CBX3/MYC/HIF1A/RAD51AP1/UBE2A/USP3/KAT6B/CBX7/CITED2/THRB	68
CC	GO:0061695	transferase complex, transferring phosphorus-containing groups	52/1837	259/19717	8.39477e-08	7.28246e-06	5.40137e-06	SOCS1/PIK3R1/SETD5/CCNF/IGF1R/ZBTB7A/SOCS7/PRKAB2/CDK6/CAB39/ATG14/CD3EAP/REV3L/SIK1/POLR2F/TGFBR1/ACVR2A/CDKN1A/SOCS5/CCNK/POLD3/ULK1/CCND2/TAF8/GTF2E2/CCNE1/PFKP/SMCR8/PRKAA2/CCNT2/IRS1/PRKAR2A/TP53/PHKA1/CCNY/CCND1/DNA2/RB1/TBPL1/SOCS6/ACVR1/TAF9B/CCNB1/SESN2/GTF2H1/PRKAR1A/PRKAA1/CCNT1/CCNJ/PCNA/GTF2H3/RPRD2	52
CC	GO:0031461	cullin-RING ubiquitin ligase complex	37/1837	158/19717	1.12056e-07	8.6408e-06	6.40884e-06	ARIH1/DDA1/KLHL21/CCNF/ANAPC13/ANAPC16/SKP2/FBXL3/FBXL20/KLHL15/FBXL13/PDCD6/FBXO32/CDC27/DCAF17/BTRC/KCTD2/FBXW8/CUL3/FBXW7/SPOP/DCAF10/ARIH2/DCAF16/TNFAIP1/KLHL12/KLHL24/FBXL7/ENC1/ANAPC7/PLRG1/FBXL17/CUL2/DCAF7/ZER1/KLHL25/FBXL18	37
CC	GO:0030175	filopodium	28/1837	104/19717	1.80209e-07	1.25065e-05	9.27603e-06	B4GALT1/MORN4/ACTA1/UBE2Q1/TWF1/ITGB1/APP/MYO5A/ITGB3/EZR/MYO10/ARF6/PPP1R9B/EPHA4/RDX/DMD/IGF2BP1/NPTXR/PODXL/ITGA3/SPATA13/OSBPL3/PDPN/NF2/VASP/MSN/UTRN/SRCIN1	28
CC	GO:0031252	cell leading edge	70/1837	403/19717	2.34787e-07	1.48129e-05	1.09867e-05	CLIP1/PTK2B/NDEL1/NHS/RAB22A/TIRAP/SNX5/CTNND1/CDK6/ACTA1/GABARAPL1/PSD3/FLOT1/SSX2IP/S100A11/TWF1/ITGB1/ACTR2/AMOT/APP/MYO5A/DDN/ITGB3/EZR/RAB13/MYO10/APC2/ARF6/PACSIN1/SLC1A2/PLXND1/AMOTL1/PPP1R9B/RHOA/FERMT2/PTPRM/LIMA1/CORO1C/PIP5K1A/WASF3/CD2AP/RDX/DLC1/IGF2BP1/PHACTR4/PODXL/MTSS1/NRBP1/SPATA13/LAYN/KCNJ11/VIM/ATP2B1/PLEKHA1/PDPN/MYO1C/HAX1/NF2/SHISA9/ADAM17/WASL/PDE4A/APPL1/SPRY4/PTPRJ/ARF1…	70
CC	GO:1902554	serine/threonine protein kinase complex	25/1837	88/19717	2.64596e-07	1.53025e-05	1.13498e-05	CCNF/ZBTB7A/CDK6/CAB39/TGFBR1/ACVR2A/CDKN1A/CCNK/ULK1/CCND2/CCNE1/SMCR8/CCNT2/PHKA1/CCNY/CCND1/RB1/ACVR1/CCNB1/SESN2/GTF2H1/CCNT1/CCNJ/PCNA/GTF2H3	25
CC	GO:0034708	methyltransferase complex	29/1837	113/19717	3.33825e-07	1.78211e-05	1.32178e-05	HCFC1/SETD1B/ZNF507/CBX5/KMT2D/SNRPB/E2F6/KMT2A/KDM5A/SUZ12/POGZ/EZH1/SNRPD1/RNF2/SETD1A/SIRT1/EZH2/MAX/KANSL1/ERH/REST/PRDM4/PHF19/WTAP/JARID2/KDM6B/HCFC2/MTF2/SNRPD3	29
CC	GO:0016363	nuclear matrix	28/1837	109/19717	5.18433e-07	2.56994e-05	1.90612e-05	DDX39B/HLCS/CLIC4/ATXN1/ATXN7/NONO/CASK/SMC1A/PHB2/SMARCAD1/MORC3/FIGN/PRKCD/TP53/YEATS4/RUNX1T1/DNMT3A/VIM/ENC1/AHCTF1/YY1/CFL2/MATR3/LMNB1/DCAF7/ZNF703/HNRNPU/ATXN3	28
CC	GO:0035097	histone methyltransferase complex	24/1837	86/19717	6.54145e-07	3.02651e-05	2.24475e-05	HCFC1/SETD1B/ZNF507/CBX5/KMT2D/E2F6/KMT2A/KDM5A/SUZ12/POGZ/EZH1/RNF2/SETD1A/SIRT1/EZH2/MAX/KANSL1/REST/PRDM4/PHF19/JARID2/KDM6B/HCFC2/MTF2	24
CC	GO:0036464	cytoplasmic ribonucleoprotein granule	43/1837	212/19717	8.07199e-07	3.50122e-05	2.59684e-05	AGO1/KPNB1/SOCS1/MEX3A/KHSRP/PABPC1/ZFP36L1/DDX3Y/FXR1/NUFIP2/CLOCK/APOBEC3F/PUM2/AGO4/TRIM71/CAPRIN1/PCBP1/ARNTL/ROCK2/G3BP2/PRKAA2/LSM14A/MBNL1/FXR2/TRIM5/IGF2BP1/SAMD4B/PSMA2/PNRC2/YBX1/DDX3X/HAX1/TNRC6A/CPEB1/SQSTM1/USP3/LIMD1/HNRNPU/G3BP1/PUM1/HABP4/HELZ/TNRC6B	43
CC	GO:0034399	nuclear periphery	31/1837	131/19717	9.16647e-07	3.74208e-05	2.77548e-05	DDX39B/HLCS/CLIC4/ATXN1/ATXN7/NONO/CASK/SMC1A/PHB2/SMARCAD1/MORC3/FIGN/PRKCD/TP53/NUP153/YEATS4/RUNX1T1/DNMT3A/VIM/ENC1/AHCTF1/YY1/CFL2/MATR3/PCNA/LMNB1/DCAF7/ZNF703/NUP98/HNRNPU/ATXN3	31
CC	GO:0001726	ruffle	37/1837	172/19717	1.06093e-06	4.09049e-05	3.0339e-05	CLIP1/RAB22A/TIRAP/SNX5/CDK6/PSD3/S100A11/TWF1/ITGB1/AMOT/MYO5A/ITGB3/EZR/MYO10/ARF6/PACSIN1/PPP1R9B/RHOA/LIMA1/CORO1C/PIP5K1A/CD2AP/RDX/DLC1/PODXL/MTSS1/SPATA13/LAYN/PLEKHA1/PDPN/MYO1C/NF2/ADAM17/PDE4A/APPL1/SPRY4/PTPRJ	37
CC	GO:0035770	ribonucleoprotein granule	44/1837	223/19717	1.32744e-06	4.84865e-05	3.59622e-05	AGO1/KPNB1/SOCS1/MEX3A/KHSRP/PABPC1/ZFP36L1/DDX3Y/FXR1/NUFIP2/CLOCK/APOBEC3F/PUM2/AGO4/TRIM71/CAPRIN1/PCBP1/ARNTL/ROCK2/G3BP2/PRKAA2/LSM14A/HNRNPA3/MBNL1/FXR2/TRIM5/IGF2BP1/SAMD4B/PSMA2/PNRC2/YBX1/DDX3X/HAX1/TNRC6A/CPEB1/SQSTM1/USP3/LIMD1/HNRNPU/G3BP1/PUM1/HABP4/HELZ/TNRC6B	44
CC	GO:0031253	cell projection membrane	57/1837	326/19717	2.44357e-06	8.4792e-05	6.28899e-05	B4GALT1/TIRAP/SLC5A6/GABARAPL1/PSD3/SHOC2/KCNK1/EVC/TWF1/TMEM67/ITGB1/DDN/CASK/ITGB3/EZR/MYO10/APC2/ARF6/PACSIN1/SLC1A2/PLXND1/PPP1R9B/RHOA/FERMT2/PKD1/HHIP/LIMA1/CORO1C/MAPRE1/PHLPP2/PIP5K1A/TMEM231/DLC1/DMD/FOLR1/PODXL/ITGA3/SPATA13/KCNJ11/ATP2B1/PLEKHA1/PDPN/MYO1C/PROM2/SLC7A11/NF2/SHISA9/ADAM17/PDE4A/SPRY4/PTPRJ/SLC26A3/VASP/CYBRD1/MSN/UTRN/VEZT	57
CC	GO:0031519	PcG protein complex	16/1837	47/19717	2.75601e-06	9.10794e-05	6.75532e-05	PHC3/PCGF3/BAP1/SUZ12/CBX2/EZH1/RNF2/SIRT1/EZH2/ASXL1/CBX4/PHF19/JARID2/MTF2/YY1/CBX7	16
CC	GO:0042470	melanosome	25/1837	106/19717	1.07394e-05	0.00032405	0.000240347	YWHAZ/CALU/NAP1L1/FLOT1/ATP1B3/TMED10/HSP90B1/ITGB1/MYO5A/AHCY/RAB5B/YWHAE/ITGB3/TMEM33/PDIA6/CANX/RAB1A/SLC1A5/HSP90AA1/SLC2A1/RAB2A/SLC3A2/FASN/ATP1A1/SYPL1	25
CC	GO:0048770	pigment granule	25/1837	106/19717	1.07394e-05	0.00032405	0.000240347	YWHAZ/CALU/NAP1L1/FLOT1/ATP1B3/TMED10/HSP90B1/ITGB1/MYO5A/AHCY/RAB5B/YWHAE/ITGB3/TMEM33/PDIA6/CANX/RAB1A/SLC1A5/HSP90AA1/SLC2A1/RAB2A/SLC3A2/FASN/ATP1A1/SYPL1	25
CC	GO:0031527	filopodium membrane	9/1837	18/19717	1.1563e-05	0.000334362	0.000247995	ITGB3/MYO10/ARF6/DMD/ITGA3/PDPN/NF2/VASP/UTRN	9
CC	GO:0030133	transport vesicle	63/1837	392/19717	1.27188e-05	0.000353073	0.000261873	SAR1B/FURIN/SNAPIN/NDEL1/SEC24A/AP1S1/SYT7/BDNF/TGFA/RAB14/TMED10/SH3GL2/SCAMP2/PDCD6/IGF2R/UNC13D/STX17/M6PR/RAB10/APP/UNC13A/ZNRF1/RAB5B/RPH3A/SAR1A/SEC23IP/EDN1/TMED7/STX16/FGFRL1/SREBF2/SEMA4C/SLC17A5/GOPC/SYT15/SSPN/SURF4/GRIN2A/HLA-DRA/KDELR1/RAB1B/SV2B/RAB1A/FOLR1/KLHL12/STX6/NPTX1/APH1A/SLC6A9/PLEKHF2/PICALM/ATG9A/SEC23A/SNAP25/PLIN3/TGOLN2/GOSR1/SYNRG/RAB15/SEC24C/VAMP1/TMEM184A/SYPL1	63
CC	GO:0000307	cyclin-dependent protein kinase holoenzyme complex	14/1837	42/19717	1.51896e-05	0.000405444	0.000300716	CCNF/CDK6/CDKN1A/CCNK/CCND2/CCNE1/CCNT2/CCNY/CCND1/RB1/CCNB1/CCNT1/CCNJ/PCNA	14
CC	GO:0017053	transcription repressor complex	20/1837	77/19717	1.77877e-05	0.000457211	0.000339111	CHD4/HMGB1/ZBTB7A/CBX5/SKI/HDGF/JUN/TFAP4/PHF12/TBL1XR1/LIN9/SP1/GATAD2B/CCND1/REST/CTBP2/TBX18/JAZF1/MIER1/RBPJ	20
CC	GO:0030127	COPII vesicle coat	8/1837	15/19717	1.97637e-05	0.000489858	0.000363325	SAR1B/SEC24A/PDCD6/SAR1A/TMED7/KLHL12/SEC23A/SEC24C	8
CC	GO:0005911	cell-cell junction	65/1837	416/19717	2.32561e-05	0.000556542	0.000412785	PIK3R1/NHS/PMP22/B4GALT1/CTNND1/FLOT1/CLDN18/CLDN1/ATP2A2/DNMBP/GJB1/NFASC/TGFBR1/LIMS1/AMOTL2/CLIC4/TWF1/YWHAH/ITGB1/AMOT/APP/MPP5/CASK/CLDN12/RAB13/PKP1/AMOTL1/PPP1R9B/RHOA/FGFRL1/LIN7C/PRKCD/ASH1L/PTPRM/FZD5/CCND1/EPHA4/RAP2C/PERP/CD2AP/OCLN/PODXL/WNK3/KLHL24/MTDH/KCNJ11/RAP1B/SLC2A1/NF2/TJAP1/JAG1/CD3E/DSG2/MARVELD2/PDZD11/RAPGEF2/ADAM17/LIMD1/PTPRJ/NOTCH1/DSG3/VASP/VEZT/ATP1A1/PARD6B	65
CC	GO:0001650	fibrillar center	28/1837	132/19717	2.73024e-05	0.000626685	0.000464809	RRS1/TAX1BP3/NFIC/E2F5/PAFAH1B2/EN2/CD3EAP/POLR2F/MLLT1/FOXJ2/RREB1/EZR/COIL/UBTF/TFCP2L1/BTBD10/SMAD7/SMARCA5/ARHGAP32/MTDH/AFF4/NFIB/JAZF1/PLRG1/IP6K1/SPATA2/ZNF415/UTP15	28
CC	GO:0030135	coated vesicle	49/1837	289/19717	2.79931e-05	0.000626685	0.000464809	SAR1B/FURIN/SEC24A/AP1S1/TGFA/RAB14/TMED5/TMED10/SH3GL2/HIP1/PDCD6/IGF2R/AP2M1/UNC13D/STX17/M6PR/APP/GPR107/SAR1A/PACSIN1/SEC23IP/EDN1/TMED7/GGA2/SCARB2/SREBF2/FZD5/GOPC/FZD2/SNX18/HLA-DRA/CFTR/KDELR1/FOLR1/KLHL12/STX6/TEX261/YIPF6/PICALM/ACTR1A/SEC23A/NECAP1/VPS33A/VAMP8/TGOLN2/ARF1/SYNRG/SEC24C/ARFGAP2	49
CC	GO:1990752	microtubule end	11/1837	29/19717	3.15688e-05	0.000664356	0.00049275	CLIP1/MYO5A/SLAIN2/CLASP1/MAPRE2/CAMSAP2/MAPRE1/KNSTRN/CAMSAP1/NIN/MAPRE3	11
CC	GO:0005802	trans-Golgi network	42/1837	236/19717	3.21706e-05	0.000664356	0.00049275	FURIN/COG6/SCAMP4/AP1S1/ARL5B/LLGL1/RAB14/RBFOX1/SCAMP2/IGF2R/COG5/M6PR/RAB10/APP/PCSK5/KIF13A/SLC10A7/GCNT1/RAB13/RHOBTB3/GGA2/STX16/RAB21/PI4K2B/HLA-DRA/SCAMP3/STX6/YIPF6/SCOC/ATG9A/CHAC1/TJAP1/SNAP25/TGOLN2/CHST4/ATP11C/ARF1/GCC2/GOLGA1/PLEKHA8/ARFGAP2/AP4E1	42
CC	GO:0010008	endosome membrane	72/1837	479/19717	3.25477e-05	0.000664356	0.00049275	FURIN/SLC9A6/RAB22A/ZNRF2/SNX5/SCAMP4/LLGL1/RAB14/RAB11FIP4/LAPTM4A/SUN2/SCAMP2/AP2M1/UBB/RAB10/MTMR4/RAB5B/KIF13A/STARD3/RAB13/ARF6/LAPTM4B/TRAF6/GGA2/MICALL1/SCARB2/RAB21/AP3D1/FZD5/CORO1C/EPHA4/RAP2C/ACAP2/SNX18/LITAF/ARHGAP1/HLA-DRA/CFTR/CD164/SNX16/CAV1/SCAMP3/PLEKHM2/RAB11FIP2/RHOB/ARHGAP32/APH1A/IRAK4/ATP6V0B/ARL8B/SNX10/WNT3A/PLEKHF2/ATG9A/VPS39/TBK1/RCC2/ARL8A/VPS4A/VPS33A/PLIN3/VAMP8/AP…	72
CC	GO:0016607	nuclear speck	62/1837	397/19717	3.60982e-05	0.00071339	0.000529118	CDC34/SGK1/SETD1B/DDX39B/STK17A/WAC/DAZAP2/BDNF/KMT2E/SRSF6/NR4A2/HBP1/NONO/PCBP1/RREB1/BASP1/SMNDC1/RNPS1/PABPN1/PLAG1/GTF2E2/SREK1/GATAD2B/PRKAA2/SETD1A/CRY2/NR3C1/BAZ2A/SPOP/E2F7/PIP5K1A/CBX4/YTHDC1/RBBP6/GLI2/PRPF4B/PNISR/WTAP/PIN1/ZNF106/SON/HIPK1/SRSF2/DDX3X/NAMPT/MAML3/PLRG1/RBM25/PRKAA1/ACIN1/DYRK1A/HIF1A/NCAPG2/SFMBT2/LHPP/LUC7L2/PSKH1/CYGB/HNRNPU/SRP54/PUM1/HABP4	62
CC	GO:0005635	nuclear envelope	70/1837	464/19717	3.70058e-05	0.00071339	0.000529118	FAM169A/KPNB1/CLIP1/NDEL1/CBX5/GCH1/KPNA1/GABRB1/PARP16/DUSP2/MRPS23/SUN2/IGF2R/PUM2/SENP1/ATP2A3/TNKS2/APP/TOR1AIP2/CCND2/GATA6/OSBPL8/NPAP1/BRAP/AGFG1/TMEM33/KPNA6/NUP50/CALR/SIRT1/TBC1D20/TMEM109/NUP153/YEATS4/BICD2/IPO5/WTAP/SMAD3/BNIP2/IPO7/MTDH/AKIRIN1/RANBP2/PHF8/EIF5A2/CTDNEP1/KCNJ11/OSBPL3/YBX1/NXT2/MYO1C/CEPT1/TOR4A/AHCTF1/SMAD1/HAX1/PLRG1/TMPO/CBX3/MATR3/LMNB1/PCYT1A/PDE4D/GNAZ/LBR/PAF…	70
CC	GO:0098978	glutamatergic synapse	56/1837	349/19717	3.94825e-05	0.000740563	0.000549273	KPNA2/PTK2B/YWHAZ/CTNND1/FLOT1/FBXL20/KPNA1/CLSTN1/FXR1/SH3GL2/RTN4R/HIP1/ITGB1/SLITRK4/MYO5A/UNC13A/SPTBN2/PHB2/YWHAE/ITGB3/ARF6/SLC1A2/RHOA/FYN/LIN7C/AP3D1/EPHA4/ADORA2B/PAK3/WASF3/GRIN2A/PIN1/GRIK3/PURA/CANX/PAK2/NPTXR/CTBP2/NPTX1/PPM1H/WNT3A/ATP2B1/PRKAR1A/SHISA9/PTPRD/SNAP25/CPLX1/LYN/ARF1/PPP2R2A/FRMPD4/EPHB2/BCR/VAMP1/CRTC1/STXBP1	56
CC	GO:0030117	membrane coat	22/1837	96/19717	5.6817e-05	0.00101105	0.000749893	SAR1B/SEC24A/AP1S1/HIP1/PDCD6/IGF2R/AP2M1/SAR1A/TMED7/AP3D1/KCNQ5/KLHL12/SYNJ1/PICALM/SEC23A/VPS39/NECAP1/VPS33A/SYNRG/SEC24C/ARFGAP2/AP4E1	22
CC	GO:0048475	coated membrane	22/1837	96/19717	5.6817e-05	0.00101105	0.000749893	SAR1B/SEC24A/AP1S1/HIP1/PDCD6/IGF2R/AP2M1/SAR1A/TMED7/AP3D1/KCNQ5/KLHL12/SYNJ1/PICALM/SEC23A/VPS39/NECAP1/VPS33A/SYNRG/SEC24C/ARFGAP2/AP4E1	22
CC	GO:0043025	neuronal cell body	73/1837	497/19717	6.18455e-05	0.00107302	0.000795854	HCFC1/GLUL/PTK2B/TMPRSS5/ASCL1/NDEL1/CACNA1C/PGRMC1/PDPK1/EPHA5/DPYSL5/SNCG/CPNE5/FXR1/SH3GL2/AKAP12/RTN4R/CNNM4/KCNK1/ZNF385A/UBB/TUBB4A/RTN4RL1/APP/MYO5A/SPTBN2/MAPK1/AURKA/DDN/KIF5A/MYO10/AGFG1/GDI1/SOS1/PRKAA2/FZD5/EPHA4/KIF5C/FXR2/SMURF1/ATP1A3/TMEM100/MAP1B/GRIK3/PURA/CANX/SLC38A2/ACSL4/NPTXR/HSP90AA1/KLHL24/PHAX/CCR2/KCNJ11/PICALM/ATP2B1/KCND1/PRKAA1/RAPGEF2/KREMEN1/SLC38A7/CPLX1/MPL/LRIG2…	73
CC	GO:0120111	neuron projection cytoplasm	20/1837	84/19717	6.879e-05	0.0011644	0.000863628	SNAPIN/NDEL1/GABARAPL1/KIF5B/TRAK1/MAPK1/KIF5A/RAB21/AP3D1/KIF5C/GRIK3/PURA/CANX/KIF3B/ARL8B/ARL8A/HIF1A/KIF3A/PAFAH1B1/HNRNPU	20
CC	GO:0031463	Cul3-RING ubiquitin ligase complex	12/1837	37/19717	8.34334e-05	0.00137864	0.00102253	ARIH1/KLHL21/KLHL15/PDCD6/KCTD2/CUL3/SPOP/TNFAIP1/KLHL12/KLHL24/ENC1/KLHL25	12
CC	GO:0031256	leading edge membrane	32/1837	170/19717	9.0774e-05	0.00146505	0.00108662	TIRAP/GABARAPL1/PSD3/TWF1/ITGB1/DDN/ITGB3/EZR/APC2/PACSIN1/SLC1A2/PLXND1/PPP1R9B/RHOA/FERMT2/CORO1C/PIP5K1A/DLC1/SPATA13/KCNJ11/ATP2B1/PLEKHA1/PDPN/MYO1C/NF2/SHISA9/ADAM17/PDE4A/SPRY4/PTPRJ/VASP/VEZT	32
CC	GO:0005798	Golgi-associated vesicle	33/1837	178/19717	9.65722e-05	0.00152321	0.00112976	SAR1B/FURIN/SEC24A/AP1S1/TGFA/RAB14/TMED5/TMED10/PDCD6/IGF2R/STX17/APP/SAR1A/PACSIN1/SEC23IP/TMED7/PKD1/SREBF2/GOPC/HLA-DRA/CFTR/KDELR1/FOLR1/KLHL12/TEX261/YIPF6/ACTR1A/SEC23A/TGOLN2/ARF1/SYNRG/SEC24C/ARFGAP2	33
CC	GO:0031588	nucleotide-activated protein kinase complex	7/1837	14/19717	0.000114671	0.00176849	0.00131168	PRKAB2/SIK1/PRKAA2/PRKAR2A/SESN2/PRKAR1A/PRKAA1	7
CC	GO:0032587	ruffle membrane	21/1837	94/19717	0.000122487	0.00181253	0.00134435	TIRAP/PSD3/TWF1/ITGB1/ITGB3/EZR/PACSIN1/PPP1R9B/RHOA/CORO1C/PIP5K1A/DLC1/SPATA13/PLEKHA1/PDPN/MYO1C/NF2/ADAM17/PDE4A/SPRY4/PTPRJ	21
CC	GO:0005819	spindle	54/1837	347/19717	0.000122751	0.00181253	0.00134435	KLHL21/NDEL1/LATS2/CYLD/MAP2K5/SNCG/RAB11FIP4/ESPL1/PTP4A1/MAP7D1/MTUS1/CDC27/KIF23/APP/MAPK1/AURKA/SMC1A/TBL1XR1/NEK7/CLASP1/MAPRE2/ZNF207/HECW2/NR3C1/CUL3/MAPRE1/KIF2A/KNSTRN/SHCBP1/RB1/KIF3B/PPP2CB/NPM1/EVI5/ARL8B/CCNB1/CEP350/KATNAL1/MID1/CCSAP/CALM1/RCC2/PPP2CA/ARL8A/VPS4A/CBX3/HAUS3/ATM/KIF3A/CEP104/PAFAH1B1/NIN/MAPRE3/HNRNPU	54
CC	GO:0000792	heterochromatin	18/1837	76/19717	0.000167685	0.00242445	0.0017982	MECP2/CBX5/SALL1/MBD2/HMGA2/SUZ12/CBX2/SMARCAD1/HMGA1/RNF2/SIRT1/BAZ2A/UBE2B/UHRF2/DNMT3A/SALL4/CBX3/UBE2A	18
CC	GO:0098858	actin-based cell projection	36/1837	208/19717	0.000202461	0.00283088	0.00209965	B4GALT1/MORN4/ACTA1/UBE2Q1/NFASC/ADCY6/CLIC4/TWF1/ITGB1/APP/MYO5A/RHOC/ITGB3/EZR/MYO10/ARF6/PPP1R9B/EPHA4/RDX/DMD/IGF2BP1/NPTXR/PODXL/ITGA3/SPATA13/OSBPL3/PDPN/MYO1C/PROM2/NF2/VASP/PAFAH1B1/MSN/UTRN/VEZT/SRCIN1	36
CC	GO:0030120	vesicle coat	15/1837	58/19717	0.000204481	0.00283088	0.00209965	SAR1B/SEC24A/AP1S1/HIP1/PDCD6/AP2M1/SAR1A/TMED7/KLHL12/PICALM/SEC23A/NECAP1/SYNRG/SEC24C/ARFGAP2	15
CC	GO:0030027	lamellipodium	34/1837	193/19717	0.000212762	0.00283088	0.00209965	PTK2B/NHS/CTNND1/ACTA1/FLOT1/ITGB1/ACTR2/AMOT/APP/ITGB3/RAB13/MYO10/APC2/PLXND1/AMOTL1/PPP1R9B/RHOA/FERMT2/PTPRM/CORO1C/PIP5K1A/WASF3/RDX/IGF2BP1/PHACTR4/PODXL/NRBP1/SPATA13/PDPN/HAX1/NF2/WASL/VASP/SRCIN1	34
CC	GO:0000932	P-body	19/1837	84/19717	0.000213347	0.00283088	0.00209965	AGO1/MEX3A/ZFP36L1/APOBEC3F/AGO4/TRIM71/CAPRIN1/LSM14A/TRIM5/SAMD4B/PSMA2/PNRC2/HAX1/TNRC6A/CPEB1/SQSTM1/LIMD1/PUM1/TNRC6B	19
CC	GO:0031984	organelle subcompartment	57/1837	380/19717	0.000218786	0.00283088	0.00209965	KPNB1/SAR1B/FURIN/COG6/B4GALT1/SCAMP4/AP1S1/ARL5B/LLGL1/RAB14/RBFOX1/PARP16/DNMBP/SCAMP2/IGF2R/COG5/M6PR/RAB10/APP/PCSK5/KIF13A/SLC10A7/GCNT1/RAB13/RHOBTB3/GGA2/STX16/GALNT3/RNF41/RAB21/GOLGA7/MOB4/PI4K2B/HLA-DRA/CHSY1/SCAMP3/GALNT1/FKBP1A/STX6/APH1A/YIPF6/SCOC/ATG9A/CHAC1/TJAP1/SNAP25/B4GALT5/TGOLN2/CHST4/GOSR1/ATP11C/ARF1/GCC2/GOLGA1/PLEKHA8/ARFGAP2/AP4E1	57
CC	GO:0005793	endoplasmic reticulum-Golgi intermediate compartment	25/1837	126/19717	0.00022027	0.00283088	0.00209965	HMGB1/TGFA/TMED5/TMED10/PRRG4/SLC35C2/STX17/DICER1/FN1/SEC23IP/TMED7/UGGT1/CALR/TBC1D20/WHAMM/PDIA6/SURF4/RGMB/KDELR1/RAB1B/ERGIC1/FOLR1/RER1/TRAPPC2/RAB2A	25
CC	GO:0035371	microtubule plus-end	8/1837	20/19717	0.000252731	0.00318901	0.00236527	CLIP1/MYO5A/SLAIN2/CLASP1/MAPRE2/MAPRE1/KNSTRN/MAPRE3	8
CC	GO:0005769	early endosome	53/1837	350/19717	0.000282566	0.00347673	0.00257867	NEURL1B/SLC9A6/RAB22A/SNX5/LLGL1/RAB14/FLOT1/ANKRD13B/SH3GL2/TRAK1/PTP4A1/IGF2R/ARRDC3/APP/MYO5A/GPR107/MTMR4/RAB5B/MAPK1/SNX12/ARF6/LAPTM4B/GGA2/MAP2K1/RAB21/FZD5/EPHA4/LITAF/KDR/CFTR/SNX16/CAV1/HFE/RAB1A/RHOB/STX6/APH1A/WNT3A/PLEKHF2/PICALM/NF2/RCC2/VPS4A/VPS33A/F2R/VAMP8/APPL1/ZFYVE9/LRP6/TMEM184A/WDR81/F2RL1/TLR4	53
CC	GO:0010494	cytoplasmic stress granule	16/1837	66/19717	0.000285553	0.00347673	0.00257867	KPNB1/KHSRP/PABPC1/NUFIP2/PUM2/CAPRIN1/G3BP2/PRKAA2/LSM14A/MBNL1/IGF2BP1/YBX1/DDX3X/G3BP1/PUM1/HABP4	16
CC	GO:0030496	midbody	31/1837	173/19717	0.000290771	0.00347923	0.00258053	CTNND1/CYLD/RAB11FIP4/BCL3/KLHDC8B/HSP90B1/CLIC4/KIF23/ZFYVE26/AURKA/CEP55/KIF13A/APC2/ARF6/GDI1/RHOA/RALB/ERH/RDX/SHCBP1/PIN1/KIF3B/ARL8B/SLC2A1/RCC2/ARL8A/VPS4A/SH3GLB1/USP3/MAPRE3/HNRNPU	31
CC	GO:0035098	ESC/E(Z) complex	7/1837	16/19717	0.000323267	0.0038025	0.0028203	SUZ12/EZH1/SIRT1/EZH2/PHF19/JARID2/MTF2	7
CC	GO:0030662	coated vesicle membrane	32/1837	182/19717	0.000333193	0.00385393	0.00285844	SAR1B/SEC24A/AP1S1/TGFA/TMED10/SH3GL2/HIP1/PDCD6/IGF2R/AP2M1/STX17/M6PR/SAR1A/SEC23IP/TMED7/SCARB2/SREBF2/FZD5/FZD2/HLA-DRA/CFTR/KDELR1/FOLR1/KLHL12/PICALM/SEC23A/NECAP1/VAMP8/TGOLN2/SYNRG/SEC24C/ARFGAP2	32
CC	GO:0019898	extrinsic component of membrane	46/1837	295/19717	0.000359333	0.00408815	0.00303217	KPNA2/SOCS1/PTK2B/PIK3R1/SOCS7/SNX5/CTNND1/CYLD/MTMR3/ATG14/ATP2A2/HIP1/GNG4/SOCS5/GNG5/ULK1/RPH3A/EZR/APC2/MICALL1/RHOA/FERMT2/FYN/FRK/SNX18/PRSS22/GBA2/KRAS/SNX16/FKBP1A/SOCS6/SMAD7/CRKL/ALOX15/CDH12/SNX10/PICALM/SEC23A/SNAP25/RS1/WIPI2/RGS6/LYN/GNAZ/OSBPL2/WDR81	46
CC	GO:0005923	bicellular tight junction	24/1837	123/19717	0.000378004	0.00423121	0.00313827	NHS/PMP22/CLDN18/CLDN1/TGFBR1/AMOTL2/AMOT/MPP5/CLDN12/RAB13/AMOTL1/LIN7C/ASH1L/FZD5/CCND1/RAP2C/OCLN/WNK3/MTDH/TJAP1/MARVELD2/RAPGEF2/VASP/PARD6B	24
CC	GO:0012507	ER to Golgi transport vesicle membrane	15/1837	62/19717	0.000448145	0.00493671	0.00366154	SAR1B/SEC24A/TGFA/TMED10/PDCD6/STX17/SAR1A/SEC23IP/TMED7/SREBF2/HLA-DRA/FOLR1/KLHL12/SEC23A/SEC24C	15
CC	GO:0005643	nuclear pore	19/1837	89/19717	0.00046664	0.00506013	0.00375308	KPNB1/KPNA1/NPAP1/AGFG1/TMEM33/KPNA6/NUP50/NUP153/BICD2/IPO5/IPO7/RANBP2/EIF5A2/NXT2/MYO1C/AHCTF1/NUP98/NUP210/PARP11	19
CC	GO:0005938	cell cortex	47/1837	308/19717	0.000510583	0.00545145	0.00404332	PTK2B/CTNND1/LLGL1/FLOT1/AKAP12/TRAK1/HIP1/ACTR2/RAB10/UNC13A/RHOC/SPTBN2/RND3/CAPZA2/EZR/MYO10/ARF6/TNFAIP2/RHOBTB3/TRAF6/CLASP1/RHOA/MARCKS/FERMT2/CORO1C/MAPRE1/RDX/DLC1/CAV1/FRYL/HFE/WIPF2/CTBP2/RHOB/NRBP1/ARHGAP32/CAPZA1/ACTR1A/RIMS3/SLC2A1/HAX1/NF2/WASL/PAFAH1B1/UTRN/SPIRE1/PARD6B	47
CC	GO:0098791	Golgi apparatus subcompartment	53/1837	359/19717	0.000525877	0.00552967	0.00410134	SAR1B/FURIN/COG6/B4GALT1/SCAMP4/AP1S1/ARL5B/LLGL1/RAB14/RBFOX1/DNMBP/SCAMP2/IGF2R/COG5/M6PR/RAB10/APP/PCSK5/KIF13A/SLC10A7/GCNT1/RAB13/RHOBTB3/GGA2/STX16/GALNT3/RAB21/GOLGA7/MOB4/PI4K2B/HLA-DRA/CHSY1/SCAMP3/GALNT1/STX6/APH1A/YIPF6/SCOC/ATG9A/CHAC1/TJAP1/SNAP25/B4GALT5/TGOLN2/CHST4/GOSR1/ATP11C/ARF1/GCC2/GOLGA1/PLEKHA8/ARFGAP2/AP4E1	53
CC	GO:1904115	axon cytoplasm	14/1837	57/19717	0.000583797	0.00604709	0.0044851	SNAPIN/NDEL1/KIF5B/TRAK1/KIF5A/RAB21/AP3D1/KIF5C/KIF3B/ARL8B/ARL8A/HIF1A/KIF3A/PAFAH1B1	14
CC	GO:0042405	nuclear inclusion body	6/1837	13/19717	0.000625312	0.00636492	0.00472083	ATXN1/PABPN1/NUP153/RANBP2/NUP98/ATXN3	6
CC	GO:0008287	protein serine/threonine phosphatase complex	12/1837	45/19717	0.000641994	0.00636492	0.00472083	PPP1R3B/SHOC2/IER5/PPP1R11/PPP1R15B/PPP1R9B/PPP1R12A/PPP2CB/CTDNEP1/PPP2CA/PPP2R5E/PPP2R2A	12
CC	GO:1903293	phosphatase complex	12/1837	45/19717	0.000641994	0.00636492	0.00472083	PPP1R3B/SHOC2/IER5/PPP1R11/PPP1R15B/PPP1R9B/PPP1R12A/PPP2CB/CTDNEP1/PPP2CA/PPP2R5E/PPP2R2A	12
CC	GO:0030139	endocytic vesicle	46/1837	303/19717	0.000651373	0.00636694	0.00472233	RAB22A/TIRAP/SYT7/KIF5B/RAB14/RAB11FIP4/ATG14/SH3GL2/HSP90B1/HIP1/IGF2R/AP2M1/UBB/AMOT/RAB10/RAB5B/RAB13/ARF6/SCARB2/FZD5/CALR/RAB11FIP1/FZD2/CD2AP/ENTPD7/HLA-DRA/CAV1/STXBP3/WNT7B/WNT4/OCLN/HSP90AA1/MTSS1/STX6/ATP6V0B/VIM/WNT3A/PICALM/MYO1C/RAPGEF2/WASL/VAMP8/CACNG8/APPL1/HYOU1/STXBP1	46
CC	GO:0033116	endoplasmic reticulum-Golgi intermediate compartment membrane	16/1837	71/19717	0.000684491	0.0064799	0.00480611	TGFA/TMED5/TMED10/PRRG4/SLC35C2/STX17/TMED7/CALR/TBC1D20/WHAMM/SURF4/KDELR1/RAB1B/ERGIC1/FOLR1/RAB2A	16
CC	GO:0043296	apical junction complex	26/1837	143/19717	0.000688318	0.0064799	0.00480611	NHS/PMP22/CTNND1/CLDN18/CLDN1/TGFBR1/AMOTL2/AMOT/MPP5/CLDN12/RAB13/AMOTL1/RHOA/LIN7C/ASH1L/FZD5/CCND1/RAP2C/OCLN/WNK3/MTDH/TJAP1/MARVELD2/RAPGEF2/VASP/PARD6B	26
CC	GO:0070160	tight junction	24/1837	128/19717	0.00069094	0.0064799	0.00480611	NHS/PMP22/CLDN18/CLDN1/TGFBR1/AMOTL2/AMOT/MPP5/CLDN12/RAB13/AMOTL1/LIN7C/ASH1L/FZD5/CCND1/RAP2C/OCLN/WNK3/MTDH/TJAP1/MARVELD2/RAPGEF2/VASP/PARD6B	24
CC	GO:0030660	Golgi-associated vesicle membrane	22/1837	114/19717	0.000758904	0.00702239	0.00520848	SAR1B/SEC24A/AP1S1/TGFA/TMED10/PDCD6/STX17/SAR1A/SEC23IP/TMED7/PKD1/SREBF2/GOPC/HLA-DRA/CFTR/KDELR1/FOLR1/KLHL12/SEC23A/SYNRG/SEC24C/ARFGAP2	22
CC	GO:0030134	COPII-coated ER to Golgi transport vesicle	19/1837	93/19717	0.000826849	0.00755043	0.00560012	SAR1B/SEC24A/TGFA/TMED5/TMED10/PDCD6/STX17/APP/SAR1A/SEC23IP/TMED7/SREBF2/HLA-DRA/FOLR1/KLHL12/TEX261/YIPF6/SEC23A/SEC24C	19
CC	GO:0005876	spindle microtubule	14/1837	59/19717	0.000845621	0.00762157	0.00565289	KLHL21/CDC27/AURKA/CLASP1/CUL3/MAPRE1/KIF2A/KIF3B/CCSAP/CALM1/KIF3A/PAFAH1B1/MAPRE3/HNRNPU	14
CC	GO:0030658	transport vesicle membrane	34/1837	208/19717	0.000866888	0.00771308	0.00572076	SAR1B/SNAPIN/SEC24A/AP1S1/SYT7/TGFA/TMED10/SH3GL2/PDCD6/STX17/UNC13A/ZNRF1/RAB5B/RPH3A/SAR1A/SEC23IP/TMED7/STX16/SREBF2/SEMA4C/SLC17A5/HLA-DRA/SV2B/RAB1A/FOLR1/KLHL12/STX6/SLC6A9/SEC23A/SYNRG/SEC24C/VAMP1/TMEM184A/SYPL1	34
CC	GO:0098562	cytoplasmic side of membrane	30/1837	178/19717	0.00102829	0.00903329	0.00669995	PTK2B/SNX5/CYLD/PTEN/EPM2AIP1/ATP2A2/PTP4A1/HIP1/GNG4/GNG5/EZR/DNAJA1/TRAF6/RHOA/FERMT2/FYN/RAB21/FRK/SNX18/LITAF/KRAS/FKBP1A/NPTXR/ALOX15/ATP2B1/HM13/SNAP25/LYN/GNAZ/OSBPL2	30
CC	GO:0031248	protein acetyltransferase complex	19/1837	95/19717	0.00108274	0.00927684	0.00688059	HCFC1/NAA30/ATXN7L3/MSL1/MRGBP/KAT2B/DPF1/YEATS4/KANSL1/OGT/NAA50/KANSL1L/TAF9B/NAA15/DPF2/MSL2/MORF4L2/KAT6B/NAA25	19
CC	GO:1902493	acetyltransferase complex	19/1837	95/19717	0.00108274	0.00927684	0.00688059	HCFC1/NAA30/ATXN7L3/MSL1/MRGBP/KAT2B/DPF1/YEATS4/KANSL1/OGT/NAA50/KANSL1L/TAF9B/NAA15/DPF2/MSL2/MORF4L2/KAT6B/NAA25	19
CC	GO:0000164	protein phosphatase type 1 complex	5/1837	10/19717	0.00117875	0.00997627	0.00739936	PPP1R3B/SHOC2/PPP1R11/PPP1R15B/PPP1R9B	5
CC	GO:0031965	nuclear membrane	44/1837	296/19717	0.00130065	0.0108674	0.00806034	FAM169A/KPNB1/GCH1/DUSP2/MRPS23/SUN2/PUM2/SENP1/ATP2A3/TOR1AIP2/CCND2/GATA6/OSBPL8/NPAP1/BRAP/NUP50/SIRT1/TBC1D20/TMEM109/NUP153/YEATS4/WTAP/SMAD3/MTDH/AKIRIN1/RANBP2/PHF8/CTDNEP1/OSBPL3/YBX1/CEPT1/AHCTF1/SMAD1/HAX1/PLRG1/CBX3/MATR3/LMNB1/PDE4D/LBR/PAFAH1B1/NUP98/C2orf42/NUP210	44
CC	GO:0005871	kinesin complex	13/1837	55/19717	0.00133103	0.0108674	0.00806034	NDEL1/KIF21B/KIF5B/KIF23/KIF13A/YWHAE/KIF5A/KIF5C/KIF21A/KIF2A/KIF3B/KIF3A/PAFAH1B1	13
CC	GO:0032154	cleavage furrow	13/1837	55/19717	0.00133103	0.0108674	0.00806034	RAB11FIP4/KLHDC8B/ITGB1/RHOC/CEP55/ARF6/RHOA/RAB21/LIMA1/RDX/RHOB/NF2/SPIRE1	13
CC	GO:0043209	myelin sheath	12/1837	49/19717	0.0014524	0.0117205	0.00869307	GLUL/PMP22/PTEN/TUBB4A/ITGB1/MPP5/GDI1/HSP90AA1/KCNJ11/TSPAN2/MARVELD2/ERBB2	12
CC	GO:0098984	neuron to neuron synapse	50/1837	350/19717	0.00153986	0.0119471	0.00886108	MINK1/PTK2B/YWHAZ/CACNA1C/PDPK1/CTNND1/SYT7/PSD3/IQSEC3/KPNA1/CLSTN1/FXR1/SH3GL2/ACTR2/DCC/MAPK1/CPEB3/PHB2/PPP1R9B/SOS1/FYN/LIN7C/SEMA4C/HNRNPA3/EPHA4/GOPC/FXR2/PAK3/GRIN2A/RPL30/MAP1B/PAK2/ARHGAP32/MIB1/GRIN2D/SLC6A9/SHISA9/SIPA1L1/CPEB1/CACNG8/PRR12/LYN/ARF1/FRMPD4/NLGN2/BCR/SRCIN1/SYNJ2BP/ATP1A1/CRTC1	50
CC	GO:0035102	PRC1 complex	6/1837	15/19717	0.00154868	0.0119471	0.00886108	PHC3/PCGF3/CBX2/RNF2/CBX4/CBX7	6
CC	GO:0071565	nBAF complex	6/1837	15/19717	0.00154868	0.0119471	0.00886108	ARID1A/SMARCE1/SMARCC1/SMARCD1/DPF1/DPF2	6
CC	GO:0000152	nuclear ubiquitin ligase complex	11/1837	43/19717	0.00154933	0.0119471	0.00886108	ANAPC13/ANAPC16/PHC3/PCGF3/BCOR/CDC27/CBX2/RNF2/CBX4/ANAPC7/CBX7	11
CC	GO:0031234	extrinsic component of cytoplasmic side of plasma membrane	18/1837	91/19717	0.00164968	0.0125811	0.00933135	PTK2B/SNX5/CYLD/ATP2A2/HIP1/GNG4/GNG5/RHOA/FERMT2/FYN/FRK/SNX18/KRAS/ALOX15/SNAP25/LYN/GNAZ/OSBPL2	18
CC	GO:0019005	SCF ubiquitin ligase complex	14/1837	64/19717	0.00195892	0.0145792	0.0108133	ARIH1/CCNF/SKP2/FBXL3/FBXL20/FBXL13/FBXO32/BTRC/CUL3/FBXW7/FBXL7/FBXL17/CUL2/FBXL18	14
CC	GO:0098589	membrane region	47/1837	328/19717	0.00196551	0.0145792	0.0108133	PTK2B/FURIN/HAS2/FLOT1/UNC5B/ATP1B3/RTN4R/TGFBR1/ITGB1/RTN4RL1/APP/MAPK1/EZR/TFPI/FYN/IRS1/PRKAR2A/CORO1C/PAG1/KDR/KRAS/BICD2/DLC1/CAV1/RGMB/DMD/CBL/EFNB1/PODXL/RANBP2/OLR1/ATP2B1/PDPN/MYO1C/SLC2A1/SPRED1/PROM2/EFHD2/PRKAR1A/PPP2CA/ADAM17/F2R/LYN/TGFBR2/CASP3/LRP6/ATP1A1	47
CC	GO:0002178	palmitoyltransferase complex	5/1837	11/19717	0.00199571	0.0145792	0.0108133	ZDHHC9/ORMDL2/GOLGA7/SPTLC2/SPTLC1	5
CC	GO:1990907	beta-catenin-TCF complex	5/1837	11/19717	0.00199571	0.0145792	0.0108133	BCL9/BCL9L/TCF7L2/TLE4/PYGO2	5
CC	GO:0009898	cytoplasmic side of plasma membrane	26/1837	154/19717	0.00209328	0.0151327	0.0112239	PTK2B/SNX5/CYLD/PTEN/ATP2A2/PTP4A1/HIP1/GNG4/GNG5/EZR/TRAF6/RHOA/FERMT2/FYN/RAB21/FRK/SNX18/LITAF/KRAS/NPTXR/ALOX15/ATP2B1/SNAP25/LYN/GNAZ/OSBPL2	26
CC	GO:0005697	telomerase holoenzyme complex	7/1837	21/19717	0.0021665	0.0155005	0.0114966	SNRPB/LSM11/PTGES3/HNRNPC/SNRPD3/HNRNPU/SMG7	7
CC	GO:0030479	actin cortical patch	6/1837	16/19717	0.00228392	0.0158488	0.011755	HIP1/ACTR2/CAPZA2/WIPF2/CAPZA1/WASL	6
CC	GO:0061645	endocytic patch	6/1837	16/19717	0.00228392	0.0158488	0.011755	HIP1/ACTR2/CAPZA2/WIPF2/CAPZA1/WASL	6
CC	GO:0071437	invadopodium	6/1837	16/19717	0.00228392	0.0158488	0.011755	ITGB1/ACTR2/EZR/ITGA3/PDPN/MSN	6
CC	GO:0099572	postsynaptic specialization	49/1837	348/19717	0.00230653	0.0158488	0.011755	KPNA2/MINK1/PTK2B/CACNA1C/PDPK1/CTNND1/PSD3/IQSEC3/KPNA1/CHRNB1/CLSTN1/FXR1/ACTR2/DCC/MAPK1/CPEB3/PHB2/PPP1R9B/SOS1/FYN/LIN7C/SEMA4C/HNRNPA3/EPHA4/GOPC/FXR2/PAK3/GRIN2A/RPL30/MAP1B/PAK2/ARHGAP32/MIB1/GRIN2D/SLC6A9/SHISA9/SIPA1L1/CPEB1/CACNG8/PRR12/LYN/ARF1/FRMPD4/NLGN2/BCR/SRCIN1/SYNJ2BP/ATP1A1/CRTC1	49
CC	GO:0045121	membrane raft	45/1837	315/19717	0.00256563	0.0174564	0.0129473	PTK2B/FURIN/HAS2/FLOT1/UNC5B/ATP1B3/RTN4R/TGFBR1/ITGB1/RTN4RL1/APP/MAPK1/EZR/TFPI/FYN/IRS1/PRKAR2A/CORO1C/PAG1/KDR/KRAS/DLC1/CAV1/RGMB/DMD/CBL/EFNB1/PODXL/OLR1/ATP2B1/PDPN/MYO1C/SLC2A1/SPRED1/PROM2/EFHD2/PRKAR1A/PPP2CA/ADAM17/F2R/LYN/TGFBR2/CASP3/LRP6/ATP1A1	45
CC	GO:0014069	postsynaptic density	46/1837	324/19717	0.0026181	0.0176404	0.0130838	MINK1/PTK2B/CACNA1C/PDPK1/CTNND1/PSD3/IQSEC3/KPNA1/CLSTN1/FXR1/ACTR2/DCC/MAPK1/CPEB3/PHB2/PPP1R9B/SOS1/FYN/LIN7C/SEMA4C/HNRNPA3/EPHA4/GOPC/FXR2/PAK3/GRIN2A/RPL30/MAP1B/PAK2/ARHGAP32/MIB1/GRIN2D/SLC6A9/SHISA9/SIPA1L1/CPEB1/CACNG8/PRR12/LYN/ARF1/FRMPD4/BCR/SRCIN1/SYNJ2BP/ATP1A1/CRTC1	46
CC	GO:0098857	membrane microdomain	45/1837	316/19717	0.00272859	0.0181923	0.0134932	PTK2B/FURIN/HAS2/FLOT1/UNC5B/ATP1B3/RTN4R/TGFBR1/ITGB1/RTN4RL1/APP/MAPK1/EZR/TFPI/FYN/IRS1/PRKAR2A/CORO1C/PAG1/KDR/KRAS/DLC1/CAV1/RGMB/DMD/CBL/EFNB1/PODXL/OLR1/ATP2B1/PDPN/MYO1C/SLC2A1/SPRED1/PROM2/EFHD2/PRKAR1A/PPP2CA/ADAM17/F2R/LYN/TGFBR2/CASP3/LRP6/ATP1A1	45
CC	GO:0019897	extrinsic component of plasma membrane	27/1837	165/19717	0.00275244	0.0181923	0.0134932	KPNA2/PTK2B/SNX5/CTNND1/CYLD/ATP2A2/HIP1/GNG4/GNG5/APC2/RHOA/FERMT2/FYN/FRK/SNX18/PRSS22/KRAS/SMAD7/CRKL/ALOX15/CDH12/PICALM/SNAP25/RS1/LYN/GNAZ/OSBPL2	27
CC	GO:0051233	spindle midzone	9/1837	34/19717	0.00316672	0.020733	0.0153776	APP/AURKA/MAPRE2/MAPRE1/ARL8B/RCC2/ARL8A/MAPRE3/HNRNPU	9
CC	GO:0032279	asymmetric synapse	46/1837	328/19717	0.00332553	0.0215693	0.0159979	MINK1/PTK2B/CACNA1C/PDPK1/CTNND1/PSD3/IQSEC3/KPNA1/CLSTN1/FXR1/ACTR2/DCC/MAPK1/CPEB3/PHB2/PPP1R9B/SOS1/FYN/LIN7C/SEMA4C/HNRNPA3/EPHA4/GOPC/FXR2/PAK3/GRIN2A/RPL30/MAP1B/PAK2/ARHGAP32/MIB1/GRIN2D/SLC6A9/SHISA9/SIPA1L1/CPEB1/CACNG8/PRR12/LYN/ARF1/FRMPD4/BCR/SRCIN1/SYNJ2BP/ATP1A1/CRTC1	46
CC	GO:0032153	cell division site	14/1837	68/19717	0.00355044	0.0228149	0.0169217	RAB11FIP4/KLHDC8B/ITGB1/RHOC/RND3/CEP55/ARF6/RHOA/RAB21/LIMA1/RDX/RHOB/NF2/SPIRE1	14
CC	GO:0070603	SWI/SNF superfamily-type complex	15/1837	76/19717	0.00396819	0.0252654	0.0187392	CHD4/ARID1A/SMARCE1/ZBTB7A/EN2/SMARCC1/SUZ12/SMARCD1/DPF1/GATAD2B/RB1/HMGXB4/SMARCA5/DPF2/YY1	15
CC	GO:0016605	PML body	18/1837	99/19717	0.00430666	0.0271711	0.0201527	MKNK2/CBX5/RNF111/N4BP1/PTEN/SKI/MORC3/ARNTL/HMBOX1/SIRT1/TP53/MAX/TCF7L2/RB1/RFWD3/HIPK1/TP53INP1/SQSTM1	18
CC	GO:0030426	growth cone	27/1837	171/19717	0.0045593	0.0285059	0.0211427	PTK2B/NDEL1/CTNND1/KIF21B/KIF5B/TRAK1/RTN4R/APP/MYO5A/YWHAE/DICER1/BASP1/EPHA4/KIF5C/IGF2BP1/MAP1B/CBL/NPTXR/HSP90AA1/ITGA3/SNAP25/DOCK7/LRIG2/PAFAH1B1/NIN/UTRN/ORAI2	27
CC	GO:0030136	clathrin-coated vesicle	29/1837	188/19717	0.00473636	0.0293485	0.0217677	FURIN/AP1S1/TGFA/RAB14/TMED10/SH3GL2/HIP1/IGF2R/AP2M1/UNC13D/M6PR/GPR107/EDN1/GGA2/SCARB2/FZD5/GOPC/FZD2/SNX18/HLA-DRA/CFTR/FOLR1/STX6/PICALM/NECAP1/VPS33A/VAMP8/TGOLN2/SYNRG	29
CC	GO:0097386	glial cell projection	7/1837	24/19717	0.00503138	0.0307734	0.0228245	GLUL/NFASC/ITGB1/APP/EZR/FYN/SLC7A11	7
CC	GO:0000803	sex chromosome	8/1837	30/19717	0.00505499	0.0307734	0.0228245	PCGF3/SMARCC1/SUZ12/RNF2/UBE2B/DNMT3A/UBE2A/HNRNPU	8
CC	GO:0005874	microtubule	55/1837	416/19717	0.0051169	0.0308794	0.0229031	CLIP1/KLHL21/MID1IP1/NDEL1/CYLD/GABARAPL1/KIF21B/KIF5B/NAV1/SERP1/MTUS1/CDC27/KIF23/TUBB4A/MYO5A/AURKA/KIF13A/APPBP2/KIF5A/FIGN/SLAIN2/APC2/NEK7/CLASP1/MAPRE2/CAMSAP2/ZNF207/CUL3/MAPRE1/KIF5C/KIF21A/KIF2A/WHAMM/STMN1/KNSTRN/MAP1B/KIF3B/DCX/SYNJ1/KATNAL1/MID1/CCSAP/CALM1/RCC2/FAM161B/CDK2AP2/HAUS3/CAMSAP1/TUBB2A/KIF3A/DYNC1LI2/PAFAH1B1/NIN/MAPRE3/HNRNPU	55
CC	GO:0044853	plasma membrane raft	19/1837	109/19717	0.00550082	0.0329101	0.0244093	HAS2/FLOT1/ATP1B3/MAPK1/EZR/TFPI/IRS1/PRKAR2A/CORO1C/DLC1/CAV1/CBL/SLC2A1/SPRED1/PRKAR1A/F2R/TGFBR2/LRP6/ATP1A1	19
CC	GO:0016328	lateral plasma membrane	12/1837	57/19717	0.0055575	0.0329605	0.0244467	CLDN1/GJB1/MARK2/CLDN12/RAB13/PKD1/CORO1C/DMD/OCLN/MYO1C/DSG2/VANGL1	12
CC	GO:0031901	early endosome membrane	24/1837	149/19717	0.00560423	0.0329605	0.0244467	SLC9A6/SNX5/LLGL1/RAB14/MTMR4/RAB5B/ARF6/GGA2/RAB21/FZD5/EPHA4/LITAF/CFTR/SNX16/CAV1/WNT3A/PLEKHF2/RCC2/VAMP8/APPL1/ZFYVE9/LRP6/TMEM184A/WDR81	24
CC	GO:0030140	trans-Golgi network transport vesicle	8/1837	31/19717	0.00626689	0.0365481	0.0271075	FURIN/AP1S1/RAB14/TMED10/IGF2R/GOPC/TGOLN2/SYNRG	8
CC	GO:0008023	transcription elongation factor complex	12/1837	58/19717	0.00642668	0.0371052	0.0275207	SETD5/MLLT1/AFF3/CCNK/CCNT2/RB1/AFF4/ELL2/SUPT16H/CCNT1/MLLT3/ZC3H8	12
CC	GO:0005901	caveola	15/1837	80/19717	0.00652281	0.0371052	0.0275207	FLOT1/ATP1B3/MAPK1/TFPI/IRS1/CORO1C/DLC1/CAV1/CBL/SLC2A1/SPRED1/F2R/TGFBR2/LRP6/ATP1A1	15
CC	GO:1904949	ATPase complex	15/1837	80/19717	0.00652281	0.0371052	0.0275207	CHD4/ARID1A/SMARCE1/ZBTB7A/EN2/SMARCC1/SUZ12/SMARCD1/DPF1/GATAD2B/RB1/HMGXB4/SMARCA5/DPF2/YY1	15
CC	GO:0030427	site of polarized growth	27/1837	176/19717	0.00674284	0.0378986	0.0281093	PTK2B/NDEL1/CTNND1/KIF21B/KIF5B/TRAK1/RTN4R/APP/MYO5A/YWHAE/DICER1/BASP1/EPHA4/KIF5C/IGF2BP1/MAP1B/CBL/NPTXR/HSP90AA1/ITGA3/SNAP25/DOCK7/LRIG2/PAFAH1B1/NIN/UTRN/ORAI2	27
CC	GO:0000776	kinetochore	22/1837	135/19717	0.00677151	0.0378986	0.0281093	CLIP1/NDEL1/ANAPC16/CBX5/ZWINT/CDT1/KAT2B/SMC1A/CLASP1/ZNF207/PPP1R12A/KANSL1/KNSTRN/CENPQ/CCNB1/AHCTF1/BUB3/GPATCH11/DYNC1LI2/PAFAH1B1/NUP98/HNRNPU	22
CC	GO:0000775	chromosome, centromeric region	29/1837	193/19717	0.00685984	0.0380859	0.0282481	CLIP1/NDEL1/ANAPC16/CBX5/ZWINT/PDS5A/CDT1/KAT2B/AURKA/SMC1A/CLASP1/ZNF207/PPP1R12A/KANSL1/KNSTRN/DNMT3A/CENPQ/PPP2CB/CCNB1/AHCTF1/RCC2/PPP2CA/CBX3/BUB3/GPATCH11/DYNC1LI2/PAFAH1B1/NUP98/HNRNPU	29
CC	GO:0032839	dendrite cytoplasm	8/1837	32/19717	0.00768682	0.0423385	0.0314023	GABARAPL1/MAPK1/KIF5A/KIF5C/GRIK3/PURA/CANX/HNRNPU	8
CC	GO:0016234	inclusion body	15/1837	82/19717	0.00822181	0.0449286	0.0333234	ARIH1/ATXN1/SLFN11/PABPN1/STRADB/NUP153/UBQLN1/RANBP2/PICALM/TRIM66/TBK1/SQSTM1/SFMBT2/NUP98/ATXN3	15
CC	GO:0098793	presynapse	62/1837	491/19717	0.00848452	0.046002	0.0341195	GLUL/SNAPIN/SLC9A6/NDEL1/ZNRF2/CTNND1/AP1S1/SYT7/BDNF/GNB5/FLOT1/FBXL20/SH3GL2/DNMBP/RTN4R/HIP1/PRSS12/RAB10/APP/UNC13A/ZNRF1/RAB5B/SPTBN2/CASK/PHB2/RPH3A/ARF6/PACSIN1/SLC1A2/STX16/LIN7C/AP3D1/SEMA4C/SLC17A5/EPHA4/GRIN2A/STXBP3/PNISR/GRIK3/CANX/SV2B/CTBP2/ITGA2/STX6/APH1A/SYNJ1/KCNJ3/SLC6A9/WNT3A/PICALM/RIMS3/ATG9A/ATP2B1/SNAP25/PDZD11/CPLX1/RAB15/EPHB2/NLGN2/VAMP1/STXBP1/SYPL1	62
CC	GO:0030118	clathrin coat	10/1837	46/19717	0.0086711	0.0466492	0.0345995	AP1S1/HIP1/IGF2R/AP2M1/KCNQ5/SYNJ1/PICALM/NECAP1/VPS33A/SYNRG	10
CC	GO:0098687	chromosomal region	46/1837	347/19717	0.0093577	0.0499557	0.0370519	CLIP1/NDEL1/ANAPC16/CBX5/SALL1/ZWINT/SUN2/ORC4/PDS5A/CHEK1/TNKS2/CDT1/KAT2B/AURKA/SMC1A/EZH1/XRCC6/CLASP1/ZNF207/MCM7/HMBOX1/EZH2/PTGES3/PPP1R12A/DNA2/KANSL1/KNSTRN/DNMT3A/CENPQ/PURA/PPP2CB/CCNB1/MCM4/AHCTF1/RCC2/PPP2CA/RAD50/CBX3/BUB3/GPATCH11/PCNA/ATM/DYNC1LI2/PAFAH1B1/NUP98/HNRNPU	46
MF	GO:0001228	DNA-binding transcription activator activity, RNA polymerase II-specific	91/1783	439/17696	1.4124e-11	8.44875e-09	7.30108e-09	HCFC1/NR6A1/SIX4/ELK4/DMTF1/NFIC/SIX3/ETS1/TFAP2C/MITF/NFAT5/HOXA10/NR2C2/GABPA/MLXIP/CLOCK/CREBRF/PBX3/PLAGL2/ETV5/NR4A2/HMGA2/BACH1/MIXL1/TLX1/NUCKS1/JUN/FOXJ2/RREB1/MTF1/TFAP4/MEF2D/IRF2/MACC1/ATF6B/ARNTL/PLAG1/SP1/NEUROD1/RBPJL/NR3C1/SIRT1/E2F3/TP53/FOS/CREB1/TFDP2/LITAF/REST/ONECUT2/PRDM4/GLI2/SALL2/SOX12/SMAD3/PHOX2B/GATA4/TBPL1/SIX2/OTX1/RXRB/RORA/IRF2BP2/RFX6/YBX1/HOXD13/PRDM2/FOXJ3/FOXO3…	91
MF	GO:0001216	DNA-binding transcription activator activity	91/1783	440/17696	1.60929e-11	8.44875e-09	7.30108e-09	HCFC1/NR6A1/SIX4/ELK4/DMTF1/NFIC/SIX3/ETS1/TFAP2C/MITF/NFAT5/HOXA10/NR2C2/GABPA/MLXIP/CLOCK/CREBRF/PBX3/PLAGL2/ETV5/NR4A2/HMGA2/BACH1/MIXL1/TLX1/NUCKS1/JUN/FOXJ2/RREB1/MTF1/TFAP4/MEF2D/IRF2/MACC1/ATF6B/ARNTL/PLAG1/SP1/NEUROD1/RBPJL/NR3C1/SIRT1/E2F3/TP53/FOS/CREB1/TFDP2/LITAF/REST/ONECUT2/PRDM4/GLI2/SALL2/SOX12/SMAD3/PHOX2B/GATA4/TBPL1/SIX2/OTX1/RXRB/RORA/IRF2BP2/RFX6/YBX1/HOXD13/PRDM2/FOXJ3/FOXO3…	91
MF	GO:0046332	SMAD binding	28/1783	80/17696	1.58808e-09	5.55827e-07	4.80323e-07	PPM1A/AXIN2/ZBTB7A/RNF111/TGFBR3/SKI/TGFBR1/ACVR2A/HMGA2/JUN/COL3A1/FOS/SKIL/SMURF1/SMAD3/FKBP1A/GATA4/PURA/IPO7/SMAD7/DDX5/USP15/ACVR1/PURB/SMAD1/YY1/MYOCD/TGFBR2	28
MF	GO:0004674	protein serine/threonine kinase activity	84/1783	439/17696	5.08496e-09	1.3348e-06	1.15348e-06	MINK1/PTK2B/MKNK2/SGK1/TP53RK/STK17A/PDPK1/PRKAB2/CDK19/LATS2/MAP4K3/DSTYK/CDK6/CSNK1G2/TGFBR3/MAP2K5/PIM1/MAPK6/CAB39/RPS6KA3/CPNE3/TTN/SIK1/TAOK1/TGFBR1/PIM2/RIOK3/RPS6KA5/SMG1/ACVR2A/CHEK1/MAP3K9/MARK2/NEK9/CDK17/CCNK/MAPK1/AURKA/CASK/CAMKK2/ULK1/MAP3K3/PDIK1L/NEK7/STRADB/ROCK2/PRKAA2/PRKCD/MAP2K1/PHKA1/PAK3/MAP3K2/PRPF4B/MAP3K1/PAK2/CSNK1G3/PPM1D/WNK3/SNRK/STK38/IRAK4/PRKCE/ACVR1/AKT3/STK4/TL…	84
MF	GO:0003730	mRNA 3'-UTR binding	29/1783	91/17696	9.60516e-09	2.01708e-06	1.74308e-06	IGF2BP3/KHSRP/PABPC1/ZFP36L1/ZFP36L2/FXR1/ZNF385A/PUM2/SECISBP2L/CPEB3/ELAVL2/HNRNPA0/DAZAP1/RNPS1/ELAVL4/RSL1D1/TP53/FXR2/IGF2BP1/DDX5/SERBP1/NUDT21/HNRNPC/IGF2BP2/CPEB1/ANGEL2/HNRNPU/PUM1/CPEB2	29
MF	GO:0003714	transcription corepressor activity	52/1783	238/17696	5.71151e-08	9.99514e-06	8.63741e-06	MECP2/MIER3/ZBTB7A/ZEB1/BCOR/SKI/NSD1/ZMYND11/ZHX1/E2F6/HDGF/NACC2/NR2F2/RARA/EZH1/MXD1/BASP1/PHF12/TBL1XR1/MNT/TFCP2L1/SIRT1/EZH2/CCND1/E2F7/CBX4/TLE4/SF1/RUNX1T1/TRIB3/WNT4/DNMT3A/CTBP2/TOB2/RBFOX2/TAF9B/ZFPM2/SRSF2/DPF2/ATF3/CBFA2T3/JAZF1/YY1/PAWR/MIER1/SFMBT2/LIMD1/HNRNPU/KLF12/HSBP1/CITED2/THRB	52
MF	GO:0140297	DNA-binding transcription factor binding	67/1783	351/17696	1.98233e-07	2.97349e-05	2.56958e-05	HCFC1/CHD4/HMGB1/RARG/ASCL1/MIER3/ARID1A/SMARCE1/ZBTB7A/CBX5/GABARAPL1/NCOA2/CRTC2/GABPA/SKI/SIK1/NSD1/NR4A2/MIXL1/YWHAH/HAND1/JUN/GATA6/PHB2/RBL1/MEF2D/DNAJA1/RARB/ARNTL/CCNE1/SP1/HMGA1/NEUROD1/NCOA3/CALR/SIRT1/FOS/CREB1/BAZ2A/ASXL1/TCF7L2/TLE4/RB1/SMAD3/GATA4/NPM1/CTBP2/DDX5/MTDH/MED17/TOB2/RXRA/DHX33/TBX18/MYOCD/HOXC4/RNF14/MYC/HIF1A/MIER1/PCNA/NCAPG2/PITX2/ZNF703/NFE2L2/CRTC1/RBPJ	67
MF	GO:0004722	protein serine/threonine phosphatase activity	23/1783	76/17696	8.97272e-07	0.000117767	0.00010177	PPM1A/PDP2/PALD1/MTMR3/PTEN/SHOC2/DUSP4/MTMR4/PPM1L/PPTC7/PPP6C/PHLPP2/PPP2CB/CTDSP1/PPM1D/PPM1F/PPM1H/CTDNEP1/PPM1K/PPP2CA/CTDSP2/CTDSPL/PPP2R2A	23
MF	GO:0008139	nuclear localization sequence binding	12/1783	25/17696	1.56756e-06	0.000182882	0.000158039	KPNA2/KPNB1/KPNA1/TNPO2/NPAP1/RANBP6/BRAP/KPNA6/TNPO1/NUP153/IPO5/NUP98	12
MF	GO:0003713	transcription coactivator activity	59/1783	319/17696	3.00813e-06	0.000288301	0.000249138	HCFC1/HMGB1/RARG/ARID1A/SMARCE1/SIX3/NKX2-2/ZEB1/KMT2D/ATXN7L3/NR2C2/NCOA2/GABPA/ZFX/ZBTB18/SMARCC1/HMGB2/KAT2B/KDM5A/SMARCD1/HAND1/JUN/FGF2/BCL9/MTF1/RARA/BCL9L/RARB/MNT/CCNE1/HMGA1/NEUROD1/SP4/NCOA3/RAP2C/CARM1/MAX/ASXL1/SOX12/RB1/GATA4/MYCBP/TBPL1/NPM1/CTBP2/MTDH/RXRB/MED17/RXRA/ZFPM2/WNT3A/HCFC2/MAML3/YY1/MYOCD/RNF14/NUP98/CITED2/THRB	59
MF	GO:0001217	DNA-binding transcription repressor activity	48/1783	242/17696	3.46075e-06	0.000288301	0.000249138	HIC2/MECP2/ASCL1/ZBTB7A/TFAP2C/MITF/ZEB1/ZNF148/SALL1/E2F6/HMGA2/BACH1/HAND1/ZBTB5/MXD1/BTG2/MNT/BACH2/LRRFIP1/HIC1/SREBF2/HMBOX1/CNBP/EMX2/E2F7/MAX/IRX2/REST/SKIL/ZBTB4/PURA/TRPS1/JARID2/PURB/FOXO3/KLF16/SNAI2/ATF3/DACH1/TBX18/YY1/MYC/FOXK1/SP2/ZC3H8/KLF12/FOXO1/FOXK2	48
MF	GO:0001227	DNA-binding transcription repressor activity, RNA polymerase II-specific	48/1783	242/17696	3.46075e-06	0.000288301	0.000249138	HIC2/MECP2/ASCL1/ZBTB7A/TFAP2C/MITF/ZEB1/ZNF148/SALL1/E2F6/HMGA2/BACH1/HAND1/ZBTB5/MXD1/BTG2/MNT/BACH2/LRRFIP1/HIC1/SREBF2/HMBOX1/CNBP/EMX2/E2F7/MAX/IRX2/REST/SKIL/ZBTB4/PURA/TRPS1/JARID2/PURB/FOXO3/KLF16/SNAI2/ATF3/DACH1/TBX18/YY1/MYC/FOXK1/SP2/ZC3H8/KLF12/FOXO1/FOXK2	48
MF	GO:0042826	histone deacetylase binding	28/1783	111/17696	3.59676e-06	0.000288301	0.000249138	KPNA2/CHD4/MIER3/SIX3/CBX5/HOXA10/BCOR/KAT2B/NACC2/KCTD21/YWHAE/RARA/TFAP4/MEF2D/TRAF6/SP1/HIC1/TP53/CCND1/HSP90AA1/NUDT21/MYOCD/HIF1A/MIER1/SP2/MAPK8/UHRF1BP1/WDTC1	28
MF	GO:0008013	beta-catenin binding	23/1783	82/17696	3.84401e-06	0.000288301	0.000249138	AXIN2/TAX1BP3/SALL1/NR4A2/BTRC/BCL9/BCL9L/APC2/AMER1/TBL1XR1/SETD1A/CARM1/TCF7L2/CD2AP/PIN1/SMAD3/SMAD7/RORA/FOXO3/LZIC/KDM6B/PTPRJ/FOXO1	23
MF	GO:0035035	histone acetyltransferase binding	12/1783	29/17696	1.06509e-05	0.000745565	0.000644288	ZBTB7A/ETS1/MTF1/SP1/TP53/CREB1/KANSL1/KANSL1L/MYOCD/HIF1A/PCNA/CITED2	12
MF	GO:0042393	histone binding	40/1783	197/17696	1.23249e-05	0.00080882	0.00069895	CBX5/KMT2D/MLLT6/KMT2E/PHF13/ZMYND11/SMARCC1/KMT2A/SET/SPTY2D1/KDM5A/SUZ12/CBX2/EZH1/TBL1XR1/DPF1/SIRT1/BAZ2A/CARM1/CBX4/UHRF2/PHF19/IPO7/NPM1/SMARCA5/USP15/PHF8/SUPT16H/BRD4/ATAD2/DPF2/MTF2/NCAPG2/SFMBT2/USP3/PYGO2/MLLT3/KAT6B/ANP32B/WDTC1	40
MF	GO:0031625	ubiquitin protein ligase binding	53/1783	290/17696	1.33535e-05	0.000824776	0.000712739	ARIH1/USP25/AXIN2/PTK2B/YWHAZ/GABARAPL1/OTUB1/SKI/UBB/YOD1/CDKN1A/UBE2G1/JUN/AURKA/YWHAE/DNAJA1/LAPTM4B/TRAF6/TMBIM6/FZD6/CUL3/PRKAR2A/FZD5/CALR/TP53/FBXW7/SPOP/BAG4/RALB/PA2G4/UBE2B/TXNIP/TRIB3/SCAMP3/RB1/SMAD3/HSP90AA1/SMAD7/UBE2D2/MID1/PRKAR1A/HM13/HIF1A/CACUL1/SQSTM1/LYN/UBE2A/CUL2/NLK/FOXO1/TRAF1/NGFR/ATXN3	53
MF	GO:0008022	protein C-terminus binding	38/1783	187/17696	1.97415e-05	0.00115159	0.000995155	PTK2B/HIC2/MID1IP1/TAX1BP3/KCNK3/CEP135/PABPC1/RBFOX1/SH3GL2/CEP120/PRRC2C/ATXN1/PEX26/YWHAQ/PHB2/FN1/EZR/FIGN/XRCC6/SP1/COIL/MAP2K1/SREBF2/SIRT1/MAPRE1/YEATS4/CD2AP/PPP2CB/FOXN3/KCNJ11/MKI67/MYO1C/PPP2CA/VPS4A/PRKAA1/ERBB2/MAPRE3/SYNJ2BP	38
MF	GO:0005048	signal sequence binding	15/1783	46/17696	2.61969e-05	0.00144772	0.00125107	KPNA2/KPNB1/KPNA1/AP2M1/TNPO2/NPAP1/RANBP6/BRAP/KPNA6/TNPO1/NUP153/IPO5/KDELR1/NUP98/SRP54	15
MF	GO:0061629	RNA polymerase II-specific DNA-binding transcription factor binding	50/1783	277/17696	3.25056e-05	0.00170654	0.00147473	CHD4/RARG/MIER3/ARID1A/SMARCE1/ZBTB7A/GABARAPL1/NCOA2/NSD1/NR4A2/MIXL1/YWHAH/JUN/GATA6/PHB2/RBL1/DNAJA1/RARB/ARNTL/CCNE1/SP1/HMGA1/NEUROD1/NCOA3/CALR/SIRT1/FOS/CREB1/BAZ2A/ASXL1/TCF7L2/RB1/SMAD3/GATA4/NPM1/CTBP2/DDX5/MTDH/MED17/TOB2/RXRA/TBX18/MYOCD/RNF14/HIF1A/MIER1/PCNA/PITX2/NFE2L2/RBPJ	50
MF	GO:0044389	ubiquitin-like protein ligase binding	54/1783	308/17696	3.69752e-05	0.00184876	0.00159763	ARIH1/USP25/AXIN2/PTK2B/YWHAZ/GABARAPL1/OTUB1/SKI/UBB/YOD1/CDKN1A/UBE2G1/JUN/AURKA/YWHAE/DNAJA1/LAPTM4B/TRAF6/TMBIM6/FZD6/CUL3/PRKAR2A/FZD5/CALR/TP53/FBXW7/SPOP/BAG4/RALB/PA2G4/UBE2B/TXNIP/TRIB3/SCAMP3/RB1/SMAD3/HSP90AA1/SMAD7/UBE2D2/CCNB1/MID1/PRKAR1A/HM13/HIF1A/CACUL1/SQSTM1/LYN/UBE2A/CUL2/NLK/FOXO1/TRAF1/NGFR/ATXN3	54
MF	GO:0004842	ubiquitin-protein transferase activity	63/1783	382/17696	5.93055e-05	0.0027097	0.00234162	NEURL1B/ARIH1/MYLIP/CDC34/KLHL21/ZNRF2/SKP2/RNF111/FBXL3/BCOR/PELI3/FBXL20/UBE2Q1/AREL1/RNF165/FBXL13/UBE2V1/PPP1R11/UBE2G1/UBE3C/TRIM71/ZNRF1/NHLRC3/BTRC/WWP2/RNF24/BRAP/FBXW8/RNF157/TRAF6/HECW2/RNF2/RNF41/ZNRF3/CUL3/SIAH3/UBE2B/UBE2H/UBR3/SMURF1/UHRF2/RBBP6/TRIM5/ARIH2/UBE4B/CBL/TNFAIP1/RNF138/TRIM59/FBXL7/UBE2D2/RFWD3/MIB1/G2E3/ZFP91/FBXO11/MSL2/RNF14/UBE2Z/FBXL17/UBE2A/UBE4A/FBXL18	63
MF	GO:0051087	chaperone binding	24/1783	102/17696	5.93554e-05	0.0027097	0.00234162	GRPEL2/GNB5/DNAJA2/UBL4A/CDC25A/DNAJB4/DNAJB9/FN1/FNIP1/DNAJA1/DNAJC10/CDC37L1/SCARB2/CALR/TP53/PTGES3/BAG4/ST13/BAK1/ATP1A3/CFTR/PDPN/HYOU1/ATP1A1	24
MF	GO:0019787	ubiquitin-like protein transferase activity	66/1783	407/17696	6.76527e-05	0.00295981	0.00255775	NEURL1B/ARIH1/MYLIP/CDC34/KLHL21/ZNRF2/SKP2/RNF111/FBXL3/BCOR/PELI3/FBXL20/UBE2Q1/AREL1/RNF165/FBXL13/UBL4A/UBE2V1/PPP1R11/UBE2G1/UBE3C/TRIM71/ZNRF1/NHLRC3/BTRC/WWP2/RNF24/BRAP/FBXW8/RNF157/TRAF6/HECW2/RNF2/RNF41/ZNRF3/CUL3/SIAH3/UBE2B/UBE2H/UBR3/SMURF1/CBX4/UHRF2/RBBP6/TRIM5/ARIH2/UBE4B/CBL/TNFAIP1/RNF138/TRIM59/RANBP2/FBXL7/UBE2D2/RFWD3/MIB1/G2E3/ZFP91/FBXO11/MSL2/RNF14/UBE2Z/FBXL17/UBE2A/UBE4A…	66
MF	GO:0045296	cadherin binding	56/1783	331/17696	7.40413e-05	0.00310974	0.00268731	HCFC1/YWHAZ/BZW1/SNX5/CTNND1/TBC1D2/KIF5B/S100A11/TWF1/HDLBP/ITGB1/MARK2/RAB10/SPTBN2/PCBP1/YWHAE/EZR/PKP1/PFKP/MICALL1/RSL1D1/LRRFIP1/PTPRM/LIMA1/MAPRE1/BZW2/TES/ARHGAP1/KDR/EIF4G2/CD2AP/RDX/MPRIP/PCMT1/OLA1/CBL/PAK2/RAB1A/CRKL/STK38/SERBP1/CAPZA1/ACVR1/CDH12/PICALM/EFHD2/DDX3X/TMPO/PLEC/CAPZB/PLIN3/SLC3A2/SH3GLB1/PTPRJ/VASP/FASN	56
MF	GO:0140030	modification-dependent protein binding	30/1783	144/17696	8.83925e-05	0.00349343	0.00301888	CBX5/ZFAND6/KMT2E/PHF13/ANKRD13B/ZMYND11/KMT2A/KDM5A/SUZ12/CBX2/BAZ2A/CARM1/RAD23B/UBQLN4/CBX4/PHF19/UBQLN1/OTUD7B/USP15/PHF8/BRD4/DPF2/MTF2/TNIP2/SQSTM1/NCAPG2/LYN/MLLT3/TAB2/WDR81	30
MF	GO:0019207	kinase regulator activity	39/1783	207/17696	8.9831e-05	0.00349343	0.00301888	SOCS1/PIK3R1/CCNF/GSKIP/SOCS7/DAZAP2/CAB39/PARP16/TAOK1/CDKN1A/MARK2/SOCS5/KAT2B/CCNK/CCND2/SH3BP5/CCNE1/SMCR8/CCNT2/MAP2K1/PRKAR2A/CCNY/CCND1/TRIB3/PAK2/NPM1/SOCS6/CCNB1/STK4/SPRED1/DDX3X/CALM1/PRKAR1A/CCNT1/CCNJ/CASP3/LRP6/WDR81/ITPRIP	39
MF	GO:0019003	GDP binding	19/1783	74/17696	9.86019e-05	0.00369757	0.00319529	RAB22A/NRAS/RAB14/RAB10/RAB5B/RHOA/RRAS2/RAB21/RAP2C/RALB/KRAS/RASEF/RHOB/ARL8B/RAP1B/PCK1/RAB2A/ARF1/SRP54	19
MF	GO:0004721	phosphoprotein phosphatase activity	35/1783	182/17696	0.000132603	0.00480114	0.00414895	PPM1A/PDP2/PALD1/PPP1R3B/MTMR3/PTEN/PTPN14/PTPN12/DUSP2/PTP4A1/SHOC2/DUSP4/MTMR4/PPM1L/CDC25A/PPTC7/DUSP14/PPP6C/PTPRM/PHLPP2/PPP2CB/CTDSP1/PPM1D/PPM1F/PPM1H/CTDNEP1/PPM1K/PPP2CA/PTPRD/CTDSP2/CTDSPL/PTPDC1/LHPP/PTPRJ/PPP2R2A	35
MF	GO:0043539	protein serine/threonine kinase activator activity	12/1783	37/17696	0.000176857	0.00618999	0.00534915	DAZAP2/CAB39/PARP16/TAOK1/CCNK/CCNT2/MAP2K1/CCNB1/STK4/DDX3X/CALM1/CCNT1	12
MF	GO:0048185	activin binding	7/1783	14/17696	0.000188656	0.00638997	0.00552196	TGFBR3/TGFBR1/ACVR2A/SMURF1/FKBP1A/SMAD7/ACVR1	7
MF	GO:0050839	cell adhesion molecule binding	75/1783	499/17696	0.00026934	0.00883773	0.00763722	HCFC1/HMGB1/YWHAZ/BZW1/SNX5/CTNND1/TBC1D2/KIF5B/S100A11/TWF1/HDLBP/ITGB1/MARK2/RAB10/SPTBN2/PCBP1/FGF2/YWHAE/ITGB3/FN1/EZR/PKP1/PFKP/MICALL1/ADAM9/RSL1D1/LRRFIP1/PTPRM/CALR/COL3A1/LIMA1/MAPRE1/BZW2/TES/ARHGAP1/KDR/EIF4G2/CD2AP/RDX/MPRIP/PCMT1/OLA1/CBL/PAK2/RAB1A/ITGA3/ITGA2/CRKL/STK38/SERBP1/CAPZA1/ACVR1/CDH12/PICALM/EFHD2/DDX3X/CD151/THBS1/PTPRD/TMPO/DSG2/PLEC/CAPZB/ADAM17/PLIN3/SLC3A2/SH3GLB1/L…	75
MF	GO:0061630	ubiquitin protein ligase activity	39/1783	221/17696	0.000367586	0.0114139	0.00986341	NEURL1B/ARIH1/MYLIP/ZNRF2/SKP2/RNF111/FBXL3/PELI3/AREL1/RNF165/PPP1R11/TRIM71/ZNRF1/NHLRC3/BTRC/WWP2/RNF24/BRAP/RNF157/TRAF6/HECW2/RNF2/RNF41/ZNRF3/SIAH3/UBR3/SMURF1/UHRF2/RBBP6/ARIH2/UBE4B/CBL/RNF138/TRIM59/MSL2/RNF14/FBXL17/UBE4A/FBXL18	39
MF	GO:0003725	double-stranded RNA binding	18/1783	75/17696	0.000369592	0.0114139	0.00986341	AGO1/FXR1/STRBP/AGO4/DICER1/LRRFIP1/LSM14A/MBNL1/DDX21/MTDH/VIM/DDX3X/SIDT2/DHX33/TARBP2/SLC3A2/MSN/HNRNPU	18
MF	GO:0061608	nuclear import signal receptor activity	8/1783	20/17696	0.000433399	0.013002	0.0112358	KPNA2/KPNB1/KPNA1/TNPO2/RANBP6/KPNA6/TNPO1/IPO5	8
MF	GO:0019887	protein kinase regulator activity	33/1783	180/17696	0.00050245	0.0146548	0.0126641	SOCS1/CCNF/GSKIP/DAZAP2/CAB39/PARP16/TAOK1/CDKN1A/MARK2/KAT2B/CCNK/CCND2/SH3BP5/CCNE1/SMCR8/CCNT2/MAP2K1/PRKAR2A/CCNY/CCND1/TRIB3/PAK2/NPM1/CCNB1/STK4/SPRED1/DDX3X/CALM1/PRKAR1A/CCNT1/CCNJ/CASP3/ITPRIP	33
MF	GO:0060589	nucleoside-triphosphatase regulator activity	54/1783	344/17696	0.000665356	0.0180016	0.0155563	ARHGAP21/TBC1D2/LLGL1/GRPEL2/GNB5/DNAJA2/ATP1B3/SIPA1L2/CDC42SE1/ALS2CL/JUN/DNAJB4/TOR1AIP2/VAV3/FNIP1/AGFG1/DNAJA1/DNAJC10/GDI1/NUP50/SOS1/TBC1D20/TBC1D13/ACAP2/ARHGAP1/CHML/DLC1/IPO5/BNIP2/RAB3GAP2/IPO7/TBC1D25/DNAJC15/ARHGAP32/RANBP2/EVI5/ARHGAP15/SESN2/SLIT2/SEC23A/ARHGAP42/RAP1GDS1/SIPA1L1/RAPGEF2/ARHGAP5/WASL/RGS6/ARHGAP12/RALGDS/BCR/ARHGDIA/ARFGAP2/CPEB2/ELMOD2	54
MF	GO:0035925	mRNA 3'-UTR AU-rich region binding	9/1783	26/17696	0.000666689	0.0180016	0.0155563	KHSRP/ZFP36L1/ZFP36L2/CPEB3/HNRNPA0/ELAVL4/NUDT21/CPEB1/CPEB2	9
MF	GO:0033613	activating transcription factor binding	19/1783	85/17696	0.000668632	0.0180016	0.0155563	HCFC1/ZBTB7A/GABPA/JUN/RBL1/MEF2D/NEUROD1/FOS/CREB1/RB1/SMAD3/GATA4/NPM1/DHX33/TBX18/HOXC4/MYC/PITX2/NFE2L2	19
MF	GO:0004713	protein tyrosine kinase activity	26/1783	134/17696	0.00079806	0.0202075	0.0174625	PTK2B/IGF1R/EPHA5/DSTYK/WEE1/MAP2K5/TTN/IGF2R/ABL2/CAMKK2/FGFRL1/FYN/PRKCD/MAP2K1/EPHA4/FRK/KDR/EPHA1/CRIM1/HIPK1/FLT1/DYRK1A/LYN/ERBB2/EPHB2/EPHB4	26
MF	GO:0004724	magnesium-dependent protein serine/threonine phosphatase activity	7/1783	17/17696	0.000814278	0.0202075	0.0174625	PPM1A/PDP2/PPM1L/PPM1D/PPM1F/PPM1H/PPM1K	7
MF	GO:0061659	ubiquitin-like protein ligase activity	39/1783	230/17696	0.000822806	0.0202075	0.0174625	NEURL1B/ARIH1/MYLIP/ZNRF2/SKP2/RNF111/FBXL3/PELI3/AREL1/RNF165/PPP1R11/TRIM71/ZNRF1/NHLRC3/BTRC/WWP2/RNF24/BRAP/RNF157/TRAF6/HECW2/RNF2/RNF41/ZNRF3/SIAH3/UBR3/SMURF1/UHRF2/RBBP6/ARIH2/UBE4B/CBL/RNF138/TRIM59/MSL2/RNF14/FBXL17/UBE4A/FBXL18	39
MF	GO:0001221	transcription cofactor binding	12/1783	43/17696	0.000827544	0.0202075	0.0174625	TFAM/ZBTB7A/SIX3/HDGF/PHF12/CCNT2/CREB1/RORA/FOXO3/ZBTB49/NFE2L2/FOXO1	12
MF	GO:0016538	cyclin-dependent protein serine/threonine kinase regulator activity	13/1783	49/17696	0.000861137	0.0205499	0.0177584	CCNF/CDKN1A/KAT2B/CCNK/CCND2/CCNE1/CCNT2/CCNY/CCND1/CCNB1/CCNT1/CCNJ/CASP3	13
MF	GO:0070888	E-box binding	13/1783	50/17696	0.00105789	0.0246842	0.0213311	ASCL1/MITF/ZEB1/CLOCK/NONO/TFAP4/ARNTL/NEUROD1/SREBF2/MAX/SNAI2/MYC/HIF1A	13
MF	GO:0035257	nuclear hormone receptor binding	28/1783	152/17696	0.00119393	0.0267811	0.0231431	RARG/ARID1A/SMARCE1/ZBTB7A/NCOA2/NSD1/NR4A2/YWHAH/PHB2/RARB/CCNE1/HMGA1/NCOA3/CALR/SIRT1/BAZ2A/ASXL1/TCF7L2/RB1/SMAD3/CTBP2/DDX5/MED17/TOB2/RXRA/RNF14/HIF1A/PCNA	28
MF	GO:0008353	RNA polymerase II CTD heptapeptide repeat kinase activity	7/1783	18/17696	0.00121727	0.0267811	0.0231431	CDK19/CCNK/MAPK1/BRD4/GTF2H1/GTF2H3/CDK8	7
MF	GO:0017091	AU-rich element binding	9/1783	28/17696	0.00122428	0.0267811	0.0231431	KHSRP/ZFP36L1/ZFP36L2/CPEB3/HNRNPA0/ELAVL4/NUDT21/CPEB1/CPEB2	9
MF	GO:0048156	tau protein binding	12/1783	45/17696	0.0012837	0.0275078	0.0237712	TAOK1/MARK2/ROCK2/FYN/PIN1/PPP2CB/HSP90AA1/PICALM/PPP2CA/PRKAA1/DYRK1A/PPP2R2A	12
MF	GO:0051219	phosphoprotein binding	18/1783	83/17696	0.00132736	0.0278745	0.024088	PIK3R1/SH3BP2/IGF2R/ABL2/MAPK1/BTRC/YWHAE/IRS1/FBXW7/CBX4/PIN1/CBL/RB1/CRKL/MID1/TBK1/LYN/PAFAH1B1	18
MF	GO:0071889	14-3-3 protein binding	9/1783	29/17696	0.0016183	0.0333179	0.028792	ZFP36L1/SIK1/SYNPO2/YWHAQ/DDIT4/PPP1R12A/IRS2/PRKCE/FOXK1	9
MF	GO:0019199	transmembrane receptor protein kinase activity	17/1783	79/17696	0.00195012	0.0393774	0.0340284	IGF1R/EPHA5/TGFBR3/TGFBR1/IGF2R/ACVR2A/FGFRL1/EPHA4/KDR/EPHA1/CRIM1/ACVR1/FLT1/TGFBR2/ERBB2/EPHB2/EPHB4	17
MF	GO:1990782	protein tyrosine kinase binding	19/1783	93/17696	0.00207509	0.0411104	0.035526	PIK3R1/DAZAP2/TRAT1/PTEN/PTPN14/CPNE3/SOCS5/RNF41/IRS1/TP53/EPHA4/FRS2/CBL/HSP90AA1/ACVR1/PCNA/SQSTM1/ANXA5/GFRAL	19
MF	GO:0000900	translation repressor activity, mRNA regulatory element binding	6/1783	15/17696	0.00232697	0.0444239	0.0383894	CELF1/CPEB3/RARA/PURA/CPEB1/CPEB2	6
MF	GO:0005161	platelet-derived growth factor receptor binding	6/1783	15/17696	0.00232697	0.0444239	0.0383894	PTEN/ITGB3/VEGFA/PDGFB/LYN/PTPRJ	6
MF	GO:0047485	protein N-terminus binding	21/1783	109/17696	0.00265975	0.0498703	0.0430959	MECP2/SMARCE1/ACOX1/ZWINT/SMARCC1/YWHAQ/PHB2/TBL1XR1/ARF6/TRAF6/NCOA3/MAP2K1/TP53/GLRX/CALM1/HAX1/TARBP2/ATM/GTF2H3/RBPJ/STXBP1	21
