# Supplementary material for: Bone-Metabolism-Related Serum microRNAs to Diagnose Osteoporosis in Middle-Aged and Elderly Women
Source: Diagnostics (Basel). 2022 Nov 19;12(11):2872. doi: 10.3390/diagnostics12112872 (PMC9689310; doi:10.3390/diagnostics12112872)
Supplement: Supplementary file 1 [file diagnostics-12-02872-s001.zip › Supplementary Table S9.xls]

## Sheet: Sheet1
Supplementary Table S9. KEGG enrichment analysis of DEmiRNA target genes
ID	Description	GeneRatio	BgRatio	pvalue	p.adjust	qvalue	geneID	Count
hsa05210	Colorectal cancer	29/863	86/8102	6.88119e-09	1.29095e-06	9.03088e-07	AXIN2/PIK3R1/NRAS/TGFA/TGFBR1/CDKN1A/DCC/JUN/MAPK1/APC2/RHOA/SOS1/MAP2K1/TP53/FOS/CCND1/RALB/TCF7L2/KRAS/BAK1/SMAD3/PMAIP1/AKT3/MYC/APPL1/TGFBR2/CASP3/RALGDS/MAPK8	29
hsa05223	Non-small cell lung cancer	26/863	72/8102	8.09371e-09	1.29095e-06	9.03088e-07	PIK3R1/PDPK1/CDK6/NRAS/KIF5B/TGFA/CDKN1A/MAPK1/KIF5A/RARB/SOS1/MAP2K1/E2F3/TP53/CCND1/KIF5C/KRAS/BAK1/RB1/RXRB/RXRA/AKT3/STK4/FOXO3/E2F2/ERBB2	26
hsa04218	Cellular senescence	41/863	156/8102	2.40735e-08	2.55982e-06	1.79073e-06	PIK3R1/E2F5/ETS1/CDK6/NRAS/ZFP36L1/ZFP36L2/PTEN/TGFBR1/CHEK1/CDKN1A/MAPK1/CDC25A/BTRC/CCND2/RBL1/LIN9/CCNE1/MAP2K1/RRAS2/SIRT1/E2F3/TP53/CCND1/KRAS/IL1A/RB1/SMAD3/GATA4/AKT3/CCNB1/FOXO3/HIPK1/E2F2/CALM1/RAD50/MYC/ATM/SQSTM1/TGFBR2/FOXO1	41
hsa05222	Small cell lung cancer	29/863	92/8102	3.84682e-08	3.06784e-06	2.14612e-06	PIK3R1/SKP2/CDK6/PTEN/CDKN1A/ITGB1/LAMC1/FN1/RARB/TRAF6/CCNE1/APAF1/E2F3/TP53/CCND1/MAX/BAK1/RB1/ITGA3/ITGA2/RXRB/RXRA/AKT3/E2F2/LAMA2/MYC/CASP3/COL4A4/TRAF1	29
hsa04140	Autophagy - animal	37/863	137/8102	5.40937e-08	3.45118e-06	2.41429e-06	HMGB1/PIK3R1/IGF1R/PDPK1/GABARAPL1/MTMR3/NRAS/ATG14/PTEN/STX17/MTMR4/MAPK1/CAMKK2/ULK1/TRAF6/DDIT4/SMCR8/PRKAA2/PRKCD/MAP2K1/RRAS2/IRS1/KRAS/PPP2CB/RAB1A/IRS2/AKT3/ATG9A/TBK1/PPP2CA/WIPI2/PRKAA1/HIF1A/VAMP8/SQSTM1/SH3GLB1/MAPK8	37
hsa04110	Cell cycle	34/863	124/8102	1.25938e-07	5.74766e-06	4.0208e-06	YWHAZ/ANAPC13/E2F5/SKP2/CDK6/WEE1/ESPL1/ORC4/CDC27/CHEK1/YWHAH/CDKN1A/CDC25A/SMC1A/YWHAQ/CCND2/YWHAE/RBL1/CCNE1/MCM7/E2F3/TP53/CCND1/TFDP2/RB1/SMAD3/CCNB1/ANAPC7/MCM4/E2F2/MYC/BUB3/PCNA/ATM	34
hsa05224	Breast cancer	38/863	147/8102	1.26124e-07	5.74766e-06	4.0208e-06	AXIN2/PIK3R1/IGF1R/CDK6/NRAS/PTEN/CDKN1A/JUN/MAPK1/FGF2/NOTCH2/APC2/SP1/FZD6/SOS1/NCOA3/MAP2K1/FZD5/E2F3/TP53/FOS/CCND1/FZD2/TCF7L2/KRAS/BAK1/WNT7B/WNT4/RB1/AKT3/WNT3A/E2F2/JAG1/MYC/NOTCH1/ERBB2/LRP6/FGF9	38
hsa04068	FoxO signaling pathway	35/863	131/8102	1.65719e-07	6.33818e-06	4.4339e-06	PIK3R1/SGK1/IGF1R/PDPK1/PRKAB2/SKP2/GABARAPL1/NRAS/PTEN/TGFBR1/FBXO32/CDKN1A/MAPK1/CCND2/SOS1/PRKAA2/MAP2K1/IRS1/SIRT1/CCND1/KRAS/SMAD3/IRS2/AKT3/CCNB1/STK4/FOXO3/FOXG1/PCK1/PRKAA1/ATM/TGFBR2/NLK/MAPK8/FOXO1	35
hsa04152	AMPK signaling pathway	33/863	120/8102	1.7882e-07	6.33818e-06	4.4339e-06	PIK3R1/IGF1R/PDPK1/PRKAB2/CAB39/CPT1A/RAB14/CRTC2/RAB10/CAMKK2/ULK1/SCD/PFKP/STRADB/PRKAA2/IRS1/SIRT1/CCND1/CREB1/CFTR/PPP2CB/IRS2/AKT3/FOXO3/PPP2CA/PPP2R5E/PCK1/PRKAA1/CREB3L2/RAB2A/PPP2R2A/FOXO1/FASN	33
hsa05215	Prostate cancer	28/863	97/8102	5.16991e-07	1.6492e-05	1.15371e-05	PIK3R1/IGF1R/PDPK1/ZEB1/NRAS/TGFA/PTEN/HSP90B1/ETV5/CDKN1A/MAPK1/CCNE1/SOS1/MAP2K1/E2F3/TP53/CCND1/CREB1/TCF7L2/KRAS/PDGFB/RB1/HSP90AA1/AKT3/E2F2/CREB3L2/ERBB2/FOXO1	28
hsa05205	Proteoglycans in cancer	46/863	205/8102	5.74977e-07	1.66743e-05	1.16646e-05	PIK3R1/IGF1R/PDPK1/NRAS/CDKN1A/ITGB1/MAPK1/FGF2/VAV3/ITGB3/TFAP4/FN1/EZR/PDCD4/ROCK2/RHOA/FZD6/SOS1/MAP2K1/RRAS2/FZD5/TP53/CCND1/PPP1R12A/FZD2/FRS2/KDR/KRAS/VEGFA/RDX/CAV1/WNT7B/WNT4/CBL/ITGA2/DDX5/AKT3/WNT3A/THBS1/MYC/HIF1A/TIMP3/CASP3/ERBB2/MSN/TLR4	46
hsa04151	PI3K-Akt signaling pathway	68/863	354/8102	6.88389e-07	1.6912e-05	1.18309e-05	PIK3R1/SGK1/YWHAZ/IGF1R/PDPK1/CDK6/BDNF/NRAS/TGFA/GNB5/PTEN/CRTC2/HSP90B1/EFNA1/YWHAH/CDKN1A/GNG4/ITGB1/GNG5/LAMC1/MAPK1/FGF2/YWHAQ/CCND2/YWHAE/ITGB3/FN1/ATF6B/CCNE1/SOS1/DDIT4/PRKAA2/MAP2K1/IRS1/TP53/CCND1/CREB1/PHLPP2/KDR/KRAS/VEGFA/PDGFB/PPP2CB/HSP90AA1/ITGA3/ITGA2/RXRA/AKT3/FOXO3/THBS1/CSF1/PPP2CA/FLT1/PPP2R5E/LAMA2/PCK1/PRKAA1/CREB3L2/MYC/F2R/ERBB2/COL4A4/PPP2R2A/EPOR/GNB2/FGF9/NGFR/TLR4	68
hsa04919	Thyroid hormone signaling pathway	32/863	121/8102	7.18974e-07	1.6912e-05	1.18309e-05	PIK3R1/PDPK1/NRAS/NCOA2/ATP1B3/ATP2A2/ATP2A3/KAT2B/MAPK1/ITGB3/NOTCH2/PFKP/NCOA3/MAP2K1/TP53/CCND1/KRAS/ATP1A3/WNT4/GATA4/RXRB/MED17/RXRA/AKT3/SLC2A1/FXYD2/MYC/HIF1A/NOTCH1/FOXO1/THRB/ATP1A1	32
hsa04530	Tight junction	40/863	169/8102	7.42219e-07	1.6912e-05	1.18309e-05	PRKAB2/LLGL1/CLDN18/CLDN1/AMOTL2/ITGB1/ACTR2/AMOT/JUN/MPP5/EZR/RAB13/AMOTL1/ROCK2/RHOA/PRKAA2/CCND1/RAP2C/WHAMM/RDX/CFTR/GATA4/MAP3K1/OCLN/PPP2CB/PRKCE/NF2/TJAP1/PPP2CA/MARVELD2/PRKAA1/RAPGEF2/PCNA/ERBB2/PPP2R2A/VASP/HSPA4/MAPK8/MSN/PARD6B	40
hsa04115	p53 signaling pathway	23/863	73/8102	9.94224e-07	2.11438e-05	1.47913e-05	SESN3/CDK6/MDM4/PTEN/TNFRSF10B/CHEK1/CDKN1A/ZMAT3/CCND2/CCNE1/APAF1/RRM2/TP53/CCND1/PERP/PMAIP1/PPM1D/CCNB1/SESN2/THBS1/ATM/CASP3/SIVA1	23
hsa04722	Neurotrophin signaling pathway	31/863	119/8102	1.52377e-06	3.03801e-05	2.12526e-05	PIK3R1/PDPK1/BDNF/MAP2K5/NRAS/RPS6KA3/RPS6KA5/JUN/MAPK1/MAP3K3/YWHAE/TRAF6/RHOA/SOS1/PRKCD/MAP2K1/IRS1/TP53/FRS2/PRDM4/KRAS/MAP3K1/CRKL/IRAK4/AKT3/FOXO3/RAP1B/CALM1/MAPK8/ARHGDIA/NGFR	31
hsa05220	Chronic myeloid leukemia	23/863	76/8102	2.18228e-06	4.09499e-05	2.86467e-05	PIK3R1/CDK6/NRAS/TGFBR1/CDKN1A/MAPK1/SOS1/MAP2K1/E2F3/TP53/CCND1/KRAS/BAK1/CBL/RB1/SMAD3/CTBP2/CRKL/AKT3/E2F2/MYC/TGFBR2/BCR	23
hsa05166	Human T-cell leukemia virus 1 infection	46/863	219/8102	4.01274e-06	6.583e-05	4.60517e-05	PIK3R1/ELK4/ETS1/NRAS/PTEN/CRTC2/ESPL1/TGFBR1/ADCY6/CDC27/CHEK1/CDKN1A/KAT2B/JUN/MAPK1/CCND2/MAP3K3/ATF6B/CCNE1/MAP2K1/CALR/E2F3/TP53/FOS/CCND1/CREB1/KRAS/HLA-DRA/RB1/SMAD3/MAP3K1/CANX/TBPL1/AKT3/ANAPC7/SLC2A1/E2F2/ADCY9/CD3E/CREB3L2/MYC/BUB3/ATM/TGFBR2/MAPK8/CRTC1	46
hsa04010	MAPK signaling pathway	57/863	294/8102	4.18621e-06	6.583e-05	4.60517e-05	PPM1A/MKNK2/ELK4/IGF1R/CACNA1C/MAP4K3/BDNF/MAP2K5/NRAS/TGFA/RPS6KA3/DUSP2/CACNA2D2/TAOK1/TGFBR1/RPS6KA5/EFNA1/DUSP4/JUN/MAPK1/FGF2/MAP3K3/CACNA2D3/TRAF6/SOS1/MAP2K1/RRAS2/TP53/FOS/MAX/STMN1/KDR/KRAS/VEGFA/MAP3K2/PDGFB/IL1A/MAP3K1/PAK2/CRKL/IRAK4/AKT3/STK4/RAP1B/CSF1/FLT1/RAPGEF2/MYC/CACNG8/TGFBR2/CASP3/ERBB2/NLK/MAPK8/TAB2/FGF9/NGFR	57
hsa05226	Gastric cancer	35/863	149/8102	4.3817e-06	6.583e-05	4.60517e-05	AXIN2/PIK3R1/NRAS/TGFBR1/CDKN1A/MAPK1/FGF2/APC2/RARB/CCNE1/FZD6/SOS1/MAP2K1/FZD5/E2F3/TP53/CCND1/FZD2/TCF7L2/KRAS/BAK1/WNT7B/WNT4/RB1/SMAD3/RXRB/RXRA/AKT3/WNT3A/E2F2/MYC/TGFBR2/ERBB2/LRP6/FGF9	35
hsa05225	Hepatocellular carcinoma	38/863	168/8102	4.52402e-06	6.583e-05	4.60517e-05	AXIN2/PIK3R1/ARID1A/SMARCE1/IGF1R/CDK6/NRAS/TGFA/PTEN/TGFBR1/SMARCC1/CDKN1A/SMARCD1/MAPK1/APC2/DPF1/FZD6/SOS1/MAP2K1/FZD5/E2F3/TP53/CCND1/FZD2/TCF7L2/KRAS/BAK1/WNT7B/WNT4/RB1/SMAD3/AKT3/WNT3A/E2F2/MYC/TGFBR2/LRP6/NFE2L2	38
hsa05213	Endometrial cancer	19/863	58/8102	4.54491e-06	6.583e-05	4.60517e-05	AXIN2/PIK3R1/PDPK1/NRAS/PTEN/CDKN1A/MAPK1/APC2/SOS1/MAP2K1/TP53/CCND1/TCF7L2/KRAS/BAK1/AKT3/FOXO3/MYC/ERBB2	19
hsa05161	Hepatitis B	37/863	162/8102	4.74636e-06	6.583e-05	4.60517e-05	PTK2B/PIK3R1/YWHAZ/TIRAP/NRAS/TGFBR1/CDKN1A/JUN/MAPK1/YWHAQ/ATF6B/TRAF6/CCNE1/SOS1/APAF1/MAP2K1/E2F3/TP53/FOS/CREB1/KRAS/RB1/SMAD3/MAP3K1/IRAK4/AKT3/DDX3X/E2F2/TBK1/CREB3L2/MYC/PCNA/TGFBR2/CASP3/MAPK8/TAB2/TLR4	37
hsa05206	MicroRNAs in cancer	59/863	310/8102	5.21927e-06	6.93728e-05	4.853e-05	SOCS1/PIK3R1/RECK/CDK6/MDM4/PIM1/ZEB1/NRAS/PTEN/RPS6KA5/HMGA2/KIF23/EFNA1/CDKN1A/TRIM71/MAPK1/CDC25A/CCND2/ITGB3/DICER1/NOTCH2/EZR/APC2/PDCD4/CCNE1/RHOA/SOS1/MARCKS/DDIT4/MAP2K1/IRS1/SIRT1/E2F3/TP53/EZH2/CCND1/STMN1/KRAS/BAK1/VEGFA/RDX/PDGFB/IGF2BP1/DNMT3A/CRKL/IRS2/PRKCE/VIM/ZFPM2/WNT3A/COMMD3-BMI1/E2F2/THBS1/MYC/ATM/TIMP3/CASP3/NOTCH1/ERBB2	59
hsa01522	Endocrine resistance	26/863	98/8102	7.37147e-06	9.406e-05	6.58001e-05	PIK3R1/IGF1R/NRAS/ADCY6/CDKN1A/JUN/MAPK1/NOTCH2/SP1/SOS1/NCOA3/MAP2K1/E2F3/TP53/FOS/CCND1/CARM1/KRAS/RB1/AKT3/E2F2/ADCY9/JAG1/NOTCH1/ERBB2/MAPK8	26
hsa05212	Pancreatic cancer	22/863	76/8102	8.11384e-06	9.95506e-05	6.96411e-05	PIK3R1/CDK6/TGFA/TGFBR1/CDKN1A/MAPK1/MAP2K1/E2F3/TP53/CCND1/RALB/KRAS/BAK1/VEGFA/RB1/SMAD3/AKT3/E2F2/TGFBR2/ERBB2/RALGDS/MAPK8	22
hsa05219	Bladder cancer	15/863	41/8102	1.00717e-05	0.000118995	8.32436e-05	NRAS/RPS6KA5/CDKN1A/MAPK1/MAP2K1/E2F3/TP53/CCND1/KRAS/VEGFA/RB1/E2F2/THBS1/MYC/ERBB2	15
hsa04211	Longevity regulating pathway	24/863	89/8102	1.21886e-05	0.000134465	9.40654e-05	PIK3R1/SESN3/IGF1R/PRKAB2/NRAS/ADCY6/CAMKK2/ULK1/ATF6B/PRKAA2/IRS1/SIRT1/TP53/CREB1/KRAS/IRS2/AKT3/SESN2/FOXO3/ADCY9/PRKAA1/CREB3L2/APPL1/FOXO1	24
hsa04550	Signaling pathways regulating pluripotency of stem cells	33/863	143/8102	1.22241e-05	0.000134465	9.40654e-05	AXIN2/PIK3R1/IGF1R/LEFTY1/LEFTY2/NRAS/PCGF3/ACVR2A/HAND1/MAPK1/FGF2/SMARCAD1/APC2/FZD6/MAP2K1/FZD5/FZD2/REST/KRAS/SKIL/WNT7B/WNT4/SMAD3/JARID2/OTX1/ACVR1/AKT3/WNT3A/SMAD1/COMMD3-BMI1/ID2/MYC/HOXD1	33
hsa05216	Thyroid cancer	14/863	37/8102	1.26927e-05	0.000134965	9.44155e-05	TPM3/NRAS/CDKN1A/MAPK1/CCDC6/MAP2K1/TP53/CCND1/TCF7L2/KRAS/BAK1/RXRB/RXRA/MYC	14
hsa04390	Hippo signaling pathway	35/863	157/8102	1.50052e-05	0.000154408	0.000108017	AXIN2/YWHAZ/LATS2/LLGL1/TGFBR1/YWHAH/AMOT/MPP5/BTRC/YWHAQ/CCND2/YWHAE/APC2/FZD6/FZD5/CCND1/FZD2/TCF7L2/GLI2/WNT7B/WNT4/SMAD3/PPP2CB/SMAD7/WNT3A/SMAD1/SNAI2/ID2/NF2/PPP2CA/MYC/TGFBR2/LIMD1/PPP2R2A/PARD6B	35
hsa04931	Insulin resistance	27/863	108/8102	1.62877e-05	0.000162368	0.000113586	PIK3R1/PPP1R3B/PDPK1/PRKAB2/PYGB/CPT1A/GFPT1/PTEN/CRTC2/RPS6KA3/MLXIP/SLC27A1/PRKAA2/PRKCD/IRS1/CREB1/TRIB3/OGT/IRS2/PRKCE/AKT3/SLC2A1/PCK1/PRKAA1/CREB3L2/MAPK8/FOXO1	27
hsa05211	Renal cell carcinoma	20/863	69/8102	2.03613e-05	0.000196826	0.000137691	PIK3R1/ETS1/NRAS/TGFA/CDKN1A/JUN/MAPK1/SOS1/MAP2K1/PAK3/KRAS/VEGFA/PDGFB/PAK2/CRKL/AKT3/RAP1B/SLC2A1/HIF1A/CUL2	20
hsa04150	mTOR signaling pathway	34/863	155/8102	2.83524e-05	0.000266012	0.00018609	CLIP1/PIK3R1/SGK1/SLC7A5/IGF1R/PDPK1/SKP2/CAB39/NRAS/PTEN/RPS6KA3/MAPK1/ULK1/FNIP1/STRADB/RHOA/FZD6/SOS1/DDIT4/PRKAA2/MAP2K1/IRS1/FZD5/FZD2/KRAS/WNT7B/WNT4/AKT3/SESN2/WNT3A/RICTOR/PRKAA1/SLC3A2/LRP6	34
hsa04350	TGF-beta signaling pathway	24/863	94/8102	3.2845e-05	0.000299358	0.000209417	E2F5/LEFTY1/LEFTY2/TGFBR1/ACVR2A/MAPK1/RBL1/SP1/RHOA/SMURF1/RGMB/SMAD3/PPP2CB/SMAD7/ACVR1/SMAD1/THBS1/ID2/PPP2CA/MYC/THSD4/TGFBR2/ZFYVE9/PITX2	24
hsa05218	Melanoma	20/863	72/8102	4.02832e-05	0.000356954	0.000249709	PIK3R1/IGF1R/CDK6/MITF/NRAS/PTEN/CDKN1A/MAPK1/FGF2/MAP2K1/E2F3/TP53/CCND1/KRAS/BAK1/PDGFB/RB1/AKT3/E2F2/FGF9	20
hsa05202	Transcriptional misregulation in cancer	39/863	192/8102	4.79642e-05	0.000413529	0.000289286	SIX4/ELK4/IGF1R/MITF/HOXA10/ZEB1/HOXA9/PBX3/ETV5/HMGA2/MLLT1/KMT2A/CDKN1A/TLX1/CCND2/RARA/SP1/CCNT2/TP53/MAX/BAK1/RUNX1T1/KLF3/DDX5/RXRB/RXRA/SMAD1/COMMD3-BMI1/ID2/FLT1/MYC/CCNT1/ATM/TGFBR2/MLLT3/FOXO1/TRAF1/BCL11B/NGFR	39
hsa04137	Mitophagy - animal	19/863	68/8102	5.71998e-05	0.000480177	0.00033591	MITF/GABARAPL1/NRAS/UBB/JUN/ULK1/SP1/RRAS2/TP53/KRAS/USP15/BCL2L13/ATG9A/FOXO3/TBK1/HIF1A/SQSTM1/MAPK8/CITED2	19
hsa05132	Salmonella infection	47/863	249/8102	5.91409e-05	0.000483742	0.000338404	TIRAP/KIF5B/TNFRSF10B/KPNA1/HSP90B1/TUBB4A/M6PR/ACTR2/RAB5B/JUN/MAPK1/KIF5A/ARF6/TRAF6/ROCK2/RHOA/MAP2K1/FOS/KIF5C/SNX18/PAK3/TCF7L2/WASF3/BAK1/ELMO1/PLEKHM2/PODXL/HSP90AA1/RHOB/IRAK4/ARL8B/AKT3/ACTR1A/VPS39/ARL8A/VPS33A/MYC/WASL/TUBB2A/FYCO1/CASP3/ARF1/GCC2/DYNC1LI2/MAPK8/TAB2/TLR4	47
hsa04510	Focal adhesion	40/863	201/8102	6.244e-05	0.000497959	0.000348349	PIK3R1/IGF1R/PDPK1/PTEN/ITGB1/LAMC1/JUN/MAPK1/CCND2/VAV3/ITGB3/FN1/ROCK2/RHOA/SOS1/FYN/MAP2K1/CCND1/PPP1R12A/PIP5K1A/PAK3/KDR/VEGFA/PDGFB/CAV1/PAK2/ITGA3/ITGA2/CRKL/AKT3/RAP1B/THBS1/FLT1/PARVG/LAMA2/ARHGAP5/ERBB2/COL4A4/VASP/MAPK8	40
hsa05214	Glioma	20/863	75/8102	7.60347e-05	0.000591587	0.000413848	PIK3R1/IGF1R/CDK6/NRAS/TGFA/PTEN/CDKN1A/MAPK1/SOS1/MAP2K1/E2F3/TP53/CCND1/KRAS/BAK1/PDGFB/RB1/AKT3/E2F2/CALM1	20
hsa05165	Human papillomavirus infection	58/863	331/8102	7.7932e-05	0.000591912	0.000414075	AXIN2/CHD4/PIK3R1/CDK6/LLGL1/NRAS/PTEN/CDKN1A/ITGB1/LAMC1/MPP5/MAPK1/CCND2/ITGB3/NOTCH2/FN1/RBL1/APC2/CCNE1/FZD6/SOS1/RBPJL/MAP2K1/FZD5/TP53/CCND1/CREB1/FZD2/TCF7L2/KRAS/BAK1/VEGFA/WNT7B/WNT4/RB1/PPP2CB/TBPL1/ITGA3/ITGA2/ATP6V0B/AKT3/WNT3A/THBS1/TBK1/PPP2CA/JAG1/MAML3/PPP2R5E/LAMA2/CREB3L2/ATM/CASP3/NOTCH1/COL4A4/PPP2R2A/FOXO1/RBPJ/PARD6B	58
hsa05130	Pathogenic Escherichia coli infection	39/863	197/8102	8.65881e-05	0.000642363	0.000449368	SEC24A/TIRAP/TNFRSF10B/CLDN18/CLDN1/TMED10/TUBB4A/ITGB1/ACTR2/MYO5A/JUN/MAPK1/EZR/MYO10/ARF6/TRAF6/TMBIM6/ROCK2/RHOA/FYN/FOS/PAK3/WASF3/BAK1/OCLN/WIPF2/PAK2/RAB1A/IRAK4/MYO1C/F2R/WASL/TUBB2A/CASP3/ARF1/SEC24C/MAPK8/TAB2/TLR4	39
hsa04934	Cushing syndrome	32/863	155/8102	0.000163883	0.00118815	0.000831179	AXIN2/CACNA1C/CYP11A1/KCNK3/CDK6/KMT2D/ADCY6/NCEH1/KMT2A/CDKN1A/MAPK1/APC2/ATF6B/CCNE1/SP1/FZD6/MC2R/MAP2K1/FZD5/E2F3/CCND1/CREB1/FZD2/TCF7L2/WNT7B/WNT4/RB1/WNT3A/RAP1B/E2F2/ADCY9/CREB3L2	32
hsa05160	Hepatitis C	32/863	157/8102	0.00021009	0.0014893	0.00104185	PIK3R1/YWHAZ/CDK6/NRAS/CLDN18/CLDN1/PSME3/YWHAH/CDKN1A/MAPK1/YWHAQ/YWHAE/TRAF6/SOS1/APAF1/MAP2K1/E2F3/TP53/CCND1/KRAS/BAK1/RB1/OCLN/PPP2CB/RXRA/AKT3/E2F2/TBK1/PPP2CA/MYC/CASP3/PPP2R2A	32
hsa04141	Protein processing in endoplasmic reticulum	34/863	171/8102	0.000221906	0.00153887	0.00107652	SAR1B/SEC24A/DNAJA2/HSP90B1/EDEM3/SSR1/YOD1/UBE2G1/SEC63/SAR1A/DNAJA1/ATF6B/DNAJC10/SSR2/UGGT1/CALR/RAD23B/UBQLN4/PDIA6/BAK1/UBE4B/TRAM1/CANX/UBQLN1/HSP90AA1/UBE2D2/HSPA4L/UBXN2A/SEC23A/HYOU1/SEC24C/MAPK8/NFE2L2/ATXN3	34
hsa05167	Kaposi sarcoma-associated herpesvirus infection	37/863	193/8102	0.00025738	0.0017469	0.00122205	PIK3R1/CDK6/GABARAPL1/NRAS/GNB5/ATG14/UBB/CDKN1A/GNG4/GNG5/JUN/MAPK1/FGF2/CD200R1/MAP2K1/E2F3/TP53/FOS/CCND1/CREB1/TCF7L2/KRAS/BAK1/VEGFA/PDGFB/RB1/AKT3/MICA/E2F2/TBK1/CALM1/MYC/HIF1A/LYN/CASP3/MAPK8/GNB2	37
hsa04014	Ras signaling pathway	42/863	232/8102	0.000369911	0.00245837	0.00171976	PIK3R1/IGF1R/ETS1/BDNF/NRAS/TGFA/GNB5/SHOC2/EFNA1/GNG4/ABL2/GNG5/RAB5B/MAPK1/FGF2/BRAP/ARF6/RHOA/SOS1/MAP2K1/RRAS2/RALB/PAK3/GRIN2A/KDR/KRAS/VEGFA/PDGFB/PLA2G12A/PAK2/AKT3/STK4/RAP1B/TBK1/CALM1/CSF1/FLT1/RALGDS/MAPK8/GNB2/FGF9/NGFR	42
hsa04910	Insulin signaling pathway	28/863	137/8102	0.000489161	0.00318454	0.00222776	SOCS1/PIK3R1/MKNK2/PPP1R3B/PDPK1/PRKAB2/PYGB/NRAS/FLOT1/MAPK1/SOS1/PRKAA2/MAP2K1/IRS1/PRKAR2A/PHKA1/KRAS/CBL/CRKL/IRS2/AKT3/CALM1/PRKAR1A/PCK1/PRKAA1/MAPK8/FOXO1/FASN	28
hsa04144	Endocytosis	44/863	252/8102	0.000606428	0.00386901	0.00270658	IGF1R/RAB22A/SNX5/EPN1/PSD3/KIF5B/RAB11FIP4/IQSEC3/SH3GL2/TGFBR1/IGF2R/AP2M1/ACTR2/RAB10/RAB5B/CAPZA2/SNX12/KIF5A/ARF6/TRAF6/RHOA/RNF41/RAB11FIP1/KIF5C/ACAP2/PIP5K1A/SMURF1/CAV1/CBL/SMAD3/WIPF2/FOLR1/RAB11FIP2/CAPZA1/VPS4A/CAPZB/WASL/SH3GLB1/IQSEC2/TGFBR2/ARF1/ZFYVE9/ARFGAP2/PARD6B	44
hsa04024	cAMP signaling pathway	39/863	216/8102	0.000625045	0.00390959	0.00273497	PIK3R1/CACNA1C/ACOX1/BDNF/ATP1B3/ATP2A2/ADCY6/ATP2A3/JUN/MAPK1/VAV3/EDN1/ROCK2/RHOA/MC2R/MAP2K1/RRAS2/FOS/HHIP/CREB1/PPP1R12A/GRIN2A/ATP1A3/PDE4C/CFTR/GRIN2D/AKT3/ATP2B1/RAP1B/ADCY9/CALM1/FXYD2/CREB3L2/F2R/PDE4A/PDE4D/MAPK8/PDE10A/ATP1A1	39
hsa04933	AGE-RAGE signaling pathway in diabetic complications	22/863	100/8102	0.000680947	0.0041532	0.00290539	PIK3R1/PIM1/NRAS/TGFBR1/JUN/MAPK1/FN1/EDN1/PRKCD/COL3A1/CCND1/KRAS/VEGFA/IL1A/SMAD3/PRKCE/AKT3/TGFBR2/CASP3/COL4A4/MAPK8/FOXO1	22
hsa04015	Rap1 signaling pathway	38/863	210/8102	0.000699244	0.0041532	0.00290539	PIK3R1/IGF1R/CTNND1/NRAS/SIPA1L2/ADCY6/EFNA1/ITGB1/MAPK1/FGF2/VAV3/ITGB3/RHOA/MAP2K1/ADORA2B/RALB/GRIN2A/KDR/KRAS/VEGFA/PDGFB/CRKL/AKT3/RAP1B/ADCY9/THBS1/CALM1/CSF1/FLT1/SIPA1L1/RAPGEF2/F2R/RALGDS/VASP/PRKD3/FGF9/NGFR/PARD6B	38
hsa04120	Ubiquitin mediated proteolysis	28/863	140/8102	0.00070305	0.0041532	0.00290539	CDC34/SOCS1/ANAPC13/SKP2/UBE2Q1/CDC27/UBB/UBE2G1/UBE3C/BTRC/WWP2/FBXW8/TRAF6/CUL3/FBXW7/UBE2B/UBE2H/SMURF1/UBE4B/CBL/MAP3K1/UBE2D2/ANAPC7/MID1/UBE2Z/UBE2A/CUL2/UBE4A	28
hsa05203	Viral carcinogenesis	37/863	204/8102	0.000782059	0.00453594	0.00317314	CHD4/PIK3R1/YWHAZ/SKP2/CDK6/NRAS/CHEK1/YWHAH/CDKN1A/KAT2B/JUN/MAPK1/YWHAQ/CCND2/YWHAE/RBL1/ATF6B/GTF2E2/CCNE1/RHOA/RBPJL/TP53/CCND1/CREB1/KRAS/BAK1/RB1/PMAIP1/TBPL1/GTF2H1/DDX3X/CREB3L2/LYN/CASP3/GTF2H3/TRAF1/RBPJ	37
hsa04114	Oocyte meiosis	26/863	129/8102	0.000954169	0.00543535	0.00380233	YWHAZ/IGF1R/ANAPC13/RPS6KA3/ESPL1/ADCY6/CDC27/YWHAH/MAPK1/CPEB3/AURKA/BTRC/SMC1A/YWHAQ/YWHAE/CCNE1/MAP2K1/PPP2CB/CCNB1/ANAPC7/ADCY9/CALM1/PPP2CA/PPP2R5E/CPEB1/CPEB2	26
hsa04710	Circadian rhythm	10/863	31/8102	0.000978077	0.0054738	0.00382922	PRKAB2/FBXL3/CLOCK/BTRC/ARNTL/PRKAA2/CRY2/CREB1/RORA/PRKAA1	10
hsa04520	Adherens junction	17/863	71/8102	0.000999942	0.00549968	0.00384733	IGF1R/CTNND1/SSX2IP/TGFBR1/MAPK1/RHOA/FYN/PTPRM/TCF7L2/WASF3/SMAD3/SNAI2/WASL/TGFBR2/PTPRJ/ERBB2/NLK	17
hsa04960	Aldosterone-regulated sodium reabsorption	11/863	37/8102	0.00118442	0.00640389	0.00447987	PIK3R1/SGK1/PDPK1/ATP1B3/KCNJ1/MAPK1/IRS1/KRAS/ATP1A3/FXYD2/ATP1A1	11
hsa04213	Longevity regulating pathway - multiple species	15/863	62/8102	0.00174129	0.00925786	0.00647638	PIK3R1/IGF1R/PRKAB2/NRAS/ADCY6/PRKAA2/IRS1/SIRT1/KRAS/IRS2/AKT3/FOXO3/ADCY9/PRKAA1/FOXO1	15
hsa05217	Basal cell carcinoma	15/863	63/8102	0.00206563	0.0108022	0.00755675	AXIN2/CDKN1A/APC2/PTCH2/FZD6/FZD5/TP53/HHIP/FZD2/TCF7L2/BAK1/GLI2/WNT7B/WNT4/WNT3A	15
hsa04926	Relaxin signaling pathway	25/863	129/8102	0.00210595	0.0108354	0.00757999	PIK3R1/NRAS/GNB5/TGFBR1/ADCY6/GNG4/GNG5/JUN/MAPK1/ATF6B/EDN1/SOS1/MAP2K1/COL3A1/FOS/CREB1/KRAS/VEGFA/AKT3/ADCY9/CREB3L2/TGFBR2/COL4A4/MAPK8/GNB2	25
hsa04917	Prolactin signaling pathway	16/863	70/8102	0.00233788	0.0115732	0.00809606	SOCS1/PIK3R1/SOCS7/NRAS/SOCS5/MAPK1/CCND2/SOS1/MAP2K1/FOS/CCND1/KRAS/SOCS6/AKT3/FOXO3/MAPK8	16
hsa05230	Central carbon metabolism in cancer	16/863	70/8102	0.00233788	0.0115732	0.00809606	PIK3R1/SLC7A5/IDH2/NRAS/PTEN/MAPK1/PFKP/MAP2K1/TP53/KRAS/SLC1A5/AKT3/SLC2A1/MYC/HIF1A/ERBB2	16
hsa05135	Yersinia infection	26/863	137/8102	0.00235817	0.0115732	0.00809606	PTK2B/PIK3R1/RPS6KA3/ITGB1/ACTR2/JUN/MAPK1/VAV3/FN1/ARF6/TRAF6/ROCK2/RHOA/MAP2K1/FOS/PIP5K1A/ELMO1/WIPF2/CRKL/IRAK4/AKT3/TBK1/WASL/MAPK8/TAB2/TLR4	26
hsa05410	Hypertrophic cardiomyopathy	19/863	90/8102	0.00255814	0.0123643	0.00864952	TPM3/CACNA1C/PRKAB2/ATP2A2/TTN/CACNA2D2/ATP2A3/ITGB1/ITGB3/CACNA2D3/EDN1/PRKAA2/DMD/ITGA3/ITGA2/LAMA2/PRKAA1/SGCD/CACNG8	19
hsa04915	Estrogen signaling pathway	26/863	138/8102	0.00262005	0.0124746	0.00872663	PIK3R1/NRAS/TGFA/NCOA2/HSP90B1/ADCY6/JUN/MAPK1/RARA/ATF6B/SP1/SOS1/NCOA3/PRKCD/MAP2K1/FOS/CREB1/KRAS/KRT10/KCNJ6/HSP90AA1/KCNJ3/AKT3/ADCY9/CALM1/CREB3L2	26
hsa04728	Dopaminergic synapse	25/863	132/8102	0.00291578	0.0136784	0.00956881	LRTOMT/CACNA1C/KIF5B/GNB5/CLOCK/GNG4/GNG5/KIF5A/ATF6B/ARNTL/FOS/CREB1/KIF5C/GRIN2A/PPP2CB/KCNJ6/KCNJ3/AKT3/CALM1/PPP2CA/PPP2R5E/CREB3L2/PPP2R2A/MAPK8/GNB2	25
hsa05170	Human immunodeficiency virus 1 infection	36/863	212/8102	0.00300674	0.0138543	0.00969181	PTK2B/PIK3R1/AP1S1/WEE1/NRAS/GNB5/APOBEC3F/CHEK1/GNG4/GNG5/JUN/MAPK1/BTRC/TRAF6/MAP2K1/CALR/FOS/PAK3/KRAS/BAK1/TRIM5/PAK2/CRKL/IRAK4/AKT3/CCNB1/TBK1/CALM1/CD3E/CFL2/ATM/CASP3/MAPK8/TAB2/GNB2/TLR4	36
hsa05231	Choline metabolism in cancer	20/863	98/8102	0.00304012	0.0138543	0.00969181	PIK3R1/PDPK1/NRAS/JUN/MAPK1/GPCPD1/SP1/SOS1/MAP2K1/FOS/PIP5K1A/WASF3/KRAS/PDGFB/SLC44A1/AKT3/HIF1A/PCYT1A/RALGDS/MAPK8	20
hsa04012	ErbB signaling pathway	18/863	85/8102	0.00316641	0.0142265	0.00995225	PIK3R1/NRAS/TGFA/CDKN1A/ABL2/JUN/MAPK1/SOS1/MAP2K1/PAK3/KRAS/CBL/PAK2/CRKL/AKT3/MYC/ERBB2/MAPK8	18
hsa04071	Sphingolipid signaling pathway	23/863	119/8102	0.0032275	0.0142996	0.0100034	PIK3R1/PDPK1/DEGS1/NRAS/PTEN/ACER2/MAPK1/ROCK2/RHOA/FYN/MAP2K1/TP53/SPTLC2/KRAS/PPP2CB/PRKCE/AKT3/PPP2CA/CERS1/PPP2R5E/PPP2R2A/MAPK8/SPTLC1	23
hsa04914	Progesterone-mediated oocyte maturation	20/863	100/8102	0.00388104	0.0169596	0.0118642	PIK3R1/IGF1R/ANAPC13/RPS6KA3/ADCY6/CDC27/MAPK1/CPEB3/AURKA/CDC25A/MAP2K1/KRAS/HSP90AA1/AKT3/CCNB1/ANAPC7/ADCY9/CPEB1/MAPK8/CPEB2	20
hsa04371	Apelin signaling pathway	25/863	137/8102	0.00484728	0.0208957	0.0146177	TFAM/PRKAB2/GABARAPL1/NRAS/GNB5/TGFBR1/ADCY6/GNG4/GNG5/MAPK1/MEF2D/PRKAA2/MAP2K1/RRAS2/CCND1/KRAS/PLIN1/SMAD3/PRKCE/AKT3/ADCY9/CALM1/JAG1/PRKAA1/GNB2	25
hsa04340	Hedgehog signaling pathway	13/863	56/8102	0.00505681	0.0215083	0.0150462	CSNK1G2/EVC/BTRC/CCND2/PTCH2/CUL3/CCND1/HHIP/SPOP/SMURF1/GLI2/CSNK1G3/KIF3A	13
hsa04360	Axon guidance	31/863	182/8102	0.00540446	0.0226845	0.0158691	PIK3R1/EPHA5/DPYSL5/NRAS/UNC5B/EFNA1/PLXNA2/ITGB1/PLXNA1/DCC/MAPK1/ROCK2/RHOA/SEMA6A/FYN/SEMA4C/EPHA4/PAK3/KRAS/EPHA1/WNT4/PAK2/EFNB1/SLIT2/CFL2/SEMA6D/LRIG2/EPHB2/EPHB4/SEMA7A/PARD6B	31
hsa04666	Fc gamma R-mediated phagocytosis	19/863	97/8102	0.00609102	0.0252342	0.0176527	PIK3R1/MARCKSL1/ACTR2/MAPK1/VAV3/MYO10/ARF6/MARCKS/PRKCD/MAP2K1/PIP5K1A/WASF3/FCGR3B/CRKL/PRKCE/AKT3/CFL2/LYN/VASP	19
hsa04725	Cholinergic synapse	21/863	113/8102	0.00758627	0.0310259	0.0217043	PIK3R1/CACNA1C/NRAS/GNB5/ADCY6/GNG4/GNG5/MAPK1/FYN/MAP2K1/FOS/CREB1/KRAS/KCNJ6/KCNQ5/KCNJ3/AKT3/ADCY9/KCNQ3/CREB3L2/GNB2	21
hsa05163	Human cytomegalovirus infection	36/863	225/8102	0.00801773	0.0323749	0.022648	PTK2B/PIK3R1/CDK6/NRAS/GNB5/ADCY6/CDKN1A/GNG4/GNG5/MAPK1/ITGB3/ATF6B/SP1/ROCK2/RHOA/SOS1/MAP2K1/CALR/E2F3/TP53/CCND1/CREB1/KRAS/BAK1/VEGFA/RB1/CRKL/AKT3/E2F2/ADCY9/TBK1/CALM1/CREB3L2/MYC/CASP3/GNB2	36
hsa01521	EGFR tyrosine kinase inhibitor resistance	16/863	79/8102	0.00818601	0.0323749	0.022648	PIK3R1/IGF1R/NRAS/TGFA/PTEN/MAPK1/FGF2/SOS1/MAP2K1/KDR/KRAS/VEGFA/PDGFB/AKT3/FOXO3/ERBB2	16
hsa04261	Adrenergic signaling in cardiomyocytes	26/863	150/8102	0.00822059	0.0323749	0.022648	PPP1R1A/TPM3/CACNA1C/ATP1B3/ATP2A2/CACNA2D2/ADCY6/RPS6KA5/ATP2A3/MAPK1/CACNA2D3/ATF6B/CREB1/ATP1A3/PPP2CB/AKT3/ATP2B1/ADCY9/CALM1/PPP2CA/PPP2R5E/FXYD2/CREB3L2/CACNG8/PPP2R2A/ATP1A1	26
hsa05221	Acute myeloid leukemia	14/863	67/8102	0.00982086	0.0382055	0.0267269	PIK3R1/PIM1/NRAS/PIM2/MAPK1/RARA/SOS1/MAP2K1/CCND1/TCF7L2/KRAS/RUNX1T1/AKT3/MYC	14
hsa05418	Fluid shear stress and atherosclerosis	24/863	139/8102	0.0113522	0.0436306	0.030522	PIK3R1/MAP2K5/HSP90B1/ACVR2A/JUN/ITGB3/EDN1/RHOA/PRKAA2/TP53/FOS/KDR/VEGFA/PDGFB/CAV1/IL1A/HSP90AA1/ACVR1/AKT3/CALM1/PRKAA1/SQSTM1/MAPK8/NFE2L2	24
hsa04921	Oxytocin signaling pathway	26/863	154/8102	0.0115044	0.0436893	0.0305631	CACNA1C/PRKAB2/MAP2K5/NRAS/CACNA2D2/ADCY6/CDKN1A/JUN/MAPK1/CAMKK2/CACNA2D3/ROCK2/RHOA/PRKAA2/MAP2K1/FOS/CCND1/PPP1R12A/KRAS/KCNJ6/KCNJ3/GUCY1A2/ADCY9/CALM1/PRKAA1/CACNG8	26
hsa04920	Adipocytokine signaling pathway	14/863	69/8102	0.012709	0.0476962	0.0333661	PRKAB2/CPT1A/CAMKK2/PRKAA2/IRS1/ACSL4/RXRB/IRS2/RXRA/AKT3/SLC2A1/PCK1/PRKAA1/MAPK8	14
